# Supplementary material for: Differential Gene Expression in Soybean Leaf Tissues at Late Developmental Stages under Drought Stress Revealed by Genome-Wide Transcriptome Analysis
Source: PLoS One. 2012 Nov 19;7(11):e49522. doi: 10.1371/journal.pone.0049522 (PMC3505142; doi:10.1371/journal.pone.0049522)
Supplement: Table S4 — Differential expression data of soybean genes in R2 leaves under drought stress. (A) Numbers of genes on the 66 K Affymetrix Soybean Array GeneChip that could be annotated. (B) Microarray analysis of genes that are annotated with a function. (C) List of upregulated genes which have an annotated function. (D) List of downregulated genes which have an annotated function. (XLSX) [file pone.0049522.s004.xlsx]

## Sheet: Table S4A
Table S4. Differential expression data of soybean genes in R2 leaves under drought stress. (A) Numbers of genes on the 66K Affymetrix Soybean Array GeneChip that could be annotated.
Probe ID	Glyma ID	Descriptiona	Fold change (drought vs. well-water)	q-valueb
11764300	glyma01g00320	highly similar to ( 991)AT4G38180| Symbols: FRS5 | FRS5 (FAR1-RELATED SEQUENCE 5); zinc ion binding | chr4:17906696-17909398 REVERSE no original description	1.05829	0.665443	a: Description was derived from the Mapman file for Glycine max
11764307	glyma01g00380	nearly identical (1025)AT5G58100| Symbols: | similar to unknown protein [Arabidopsis thaliana] (TAIR:AT3G28720.1); similar to unnamed protein product [Vitis vinifera] (GB:CAO45500.1); similar to unknown protein [Oryza sativa (japonica cultivar-group)] (GB:BAD19375.1); similar to predicted protein [Physcomitrella patens subsp. patens] (GB:EDQ76415.1) | chr5:23525054-23532089 FORWARD no original de…	-1.10245	0.779144	b: Benjamini-Hochberg false discovery rate
11764329	glyma01g00400	moderately similar to ( 222)AT5G58110| Symbols: | ATPase activator/ chaperone activator/ chaperone binding | chr5:23532501-23533705 FORWARD no original description	1.50767	0.0224272
11764340	glyma01g00410	moderately similar to ( 500)AT4G31040| Symbols: | proton extrusion protein-related | chr4:15111817-15113887 REVERSEweakly similar to ( 124)CEMA_NEPOL no original description	-1.4526	0.192544
11764348	glyma01g00440	no original description	1.08071	0.804759
11764350	glyma01g00450	nearly identical (1119)AT2G07050| Symbols: CAS1 | CAS1 (CYCLOARTENOL SYNTHASE 1); cycloartenol synthase | chr2:2924626-2930292 FORWARD no original description	1.038	0.930065
11764369	glyma01g00470	weakly similar to ( 193)AT3G10572| Symbols: | 3-phosphoinositide-dependent protein kinase-1, putative | chr3:3304351-3306311 FORWARD no original description	-1.15728	0.25095
11764376	glyma01g00480	moderately similar to ( 229)AT2G07040| Symbols: ATPRK2A | ATPRK2A; ATP binding / protein serine/threonine kinase | chr2:2916618-2918757 FORWARDvery weakly similar to (92.0)PSKR_DAUCA no original description	1.07313	0.435756
11764381	glyma01g00490	highly similar to ( 706)AT2G24370| Symbols: | kinase | chr2:10377059-10380143 REVERSEweakly similar to ( 162)PSKR_DAUCA no original description	1.43816	0.444292
11764389	glyma01g00500	no original description	1.31345	0.305412
11764394	glyma01g00530	moderately similar to ( 362)AT4G10310| Symbols: ATHKT1, HKT1 | HKT1 (HIGH-AFFINITY K+ TRANSPORTER 1); sodium ion transmembrane transporter | chr4:6392004-6395663 FORWARDmoderately similar to ( 345)HKT6_ORYSA no original description	-1.07264	0.693318
11764400	glyma01g00540	moderately similar to ( 205)AT2G06925| Symbols: ATSPLA2-ALPHA, PLA2-ALPHA | ATSPLA2-ALPHA/PLA2-ALPHA (PHOSPHOLIPASE A2-ALPHA); phospholipase A2 | chr2:2842472-2843209 REVERSE no original description	-1.58345	0.32297
11764407	glyma01g00560	highly similar to ( 635)AT4G29680| Symbols: | type I phosphodiesterase/nucleotide pyrophosphatase family protein | chr4:14538073-14539563 REVERSE no original description	-2.41953	0.0528309
11764411	glyma01g00570	moderately similar to ( 255)AT4G29670| Symbols: | thioredoxin family protein | chr4:14535989-14537114 REVERSE no original description	-1.5665	0.0715544
11764418	glyma01g00580	weakly similar to ( 122)AT1G55190| Symbols: | prenylated rab acceptor (PRA1) family protein | chr1:20592117-20592686 FORWARD no original description	-1.03842	0.915095
11764420	glyma01g00590	moderately similar to ( 367)AT4G29590| Symbols: | methyltransferase | chr4:14512742-14514410 REVERSE no original description	-1.00887	0.988434
11764429	glyma01g00610	no original description	-1.1977	0.29712
11764436	glyma01g00630	weakly similar to ( 132)AT5G56780| Symbols: | similar to unknown protein [Arabidopsis thaliana] (TAIR:AT5G56770.1); similar to effector of transcription [Brassica napus] (GB:AAT00536.1) | chr5:22981610-22983467 REVERSE no original description	1.16562	0.759501
11764440	glyma01g00640	moderately similar to ( 421)AT2G15690| Symbols: | pentatricopeptide (PPR) repeat-containing protein | chr2:6838937-6840676 REVERSE no original description	-1.16862	0.491746
11764445	glyma01g00660	moderately similar to ( 452)AT5G56750| Symbols: | Ndr family protein | chr5:22975212-22977832 FORWARDmoderately similar to ( 390)SF21_HELAN no original description	1.48478	0.10211
11764457	glyma01g00680	moderately similar to ( 304)AT4G29520| Symbols: | similar to unnamed protein product [Vitis vinifera] (GB:CAO65389.1); contains InterPro domain Saposin B (InterPro:IPR008139) | chr4:14494062-14495663 REVERSE no original description	2.53858	0.0310338
11764467	glyma01g00700	highly similar to ( 655)AT4G26200| Symbols: ACS7 | ACS7 (1-Amino-cyclopropane-1-carboxylate synthase 7); 1-aminocyclopropane-1-carboxylate synthase | chr4:13275316-13276955 FORWARDhighly similar to ( 521)1A12_CUCMA no original description	1.35787	0.519362
11764471	glyma01g00710	weakly similar to ( 140)AT4G29460| Symbols: | phospholipase A2 gamma, secretory low molecular weight | chr4:14483072-14483936 REVERSE no original description	1.55867	0.155383
11764477	glyma01g00720	weakly similar to ( 190)AT2G19710| Symbols: | similar to unknown protein [Arabidopsis thaliana] (TAIR:AT4G29440.1); similar to unnamed protein product [Vitis vinifera] (GB:CAO65395.1); contains InterPro domain Protein of unknown function DUF292, eukaryotic (InterPro:IPR005061) | chr2:8513421-8516899 FORWARD no original description	1.59385	0.0358367
11764487	glyma01g00730	moderately similar to ( 286)AT4G26220| Symbols: | caffeoyl-CoA 3-O-methyltransferase, putative | chr4:13284188-13285155 FORWARDmoderately similar to ( 274)CAMT_MESCR no original description	1.74091	0.301582
11764498	glyma01g00740	weakly similar to ( 142)AT2G19740| Symbols: | 60S ribosomal protein L31 (RPL31A) | chr2:8520659-8521428 FORWARDweakly similar to ( 148)RL31_PANGI no original description	-1.88912	0.0274414
11764505	glyma01g00760	weakly similar to ( 192)AT4G29160| Symbols: SNF7.1 | SNF7.1 | chr4:14381025-14382348 FORWARD no original description	1.71705	0.0305661
11764516	glyma01g00790	highly similar to ( 666)AT4G29450| Symbols: | leucine-rich repeat protein kinase, putative | chr4:14478843-14482632 REVERSEmoderately similar to ( 284)NORK_PEA no original description	2.19119	0.140051
11764531	glyma01g00800	no original description	1.02801	0.95716
11764536	glyma01g00840	moderately similar to ( 436)AT2G19800| Symbols: MIOX2 | MIOX2 (MYO-INOSITOL OXYGENASE 2) | chr2:8538188-8540436 REVERSEmoderately similar to ( 416)MIOX_ORYSA no original description	1.10246	0.787995
11764555	glyma01g00850	highly similar to ( 701)AT4G29210| Symbols: GGT3, GGT4 | GGT3/GGT4 (GAMMA-GLUTAMYL TRANSPEPTIDASE 3); gamma-glutamyltransferase | chr4:14400996-14402758 FORWARD no original description	1.91992	0.0927431
11764565	glyma01g00880	moderately similar to ( 341)AT5G56620| Symbols: ANAC099 | ANAC099 (Arabidopsis NAC domain containing protein 99); transcription factor | chr5:22935747-22938365 REVERSE no original description	1.00038	0.999421
11764575	glyma01g00890	moderately similar to ( 421)AT4G29240| Symbols: | leucine-rich repeat family protein / extensin family protein | chr4:14418832-14420079 FORWARDweakly similar to ( 108)RPK1_IPONI no original description	-1.59548	0.141024
11764579	glyma01g00920	weakly similar to ( 196)AT4G29340| Symbols: PRF4 | PRF4 (PROFILIN 4); actin binding | chr4:14447724-14448473 FORWARDmoderately similar to ( 206)PROF6_HEVBR no original description	-1.20531	0.765609
11764583	glyma01g00930	very weakly similar to (88.2)AT5G56550| Symbols: | similar to unknown protein [Arabidopsis thaliana] (TAIR:AT4G26288.1); similar to hypothetical protein [Vitis vinifera] (GB:CAN69977.1) | chr5:22913073-22913728 REVERSE no original description	-1.15986	0.873006
11764588	glyma01g00950	no original description	1.35857	0.358445
11764592	glyma01g00960	highly similar to ( 709)AT4G26300| Symbols: EMB1027 | EMB1027 (EMBRYO DEFECTIVE 1027); ATP binding / arginine-tRNA ligase | chr4:13308409-13313118 REVERSE no original description	-1.2131	0.0900337
11764628	glyma01g00980	nearly identical (1281)AT5G45140| Symbols: NRPC2 | NRPC2 (nuclear RNA polymerase C 2); DNA binding / DNA-directed RNA polymerase | chr5:18264643-18274940 REVERSEweakly similar to ( 182)RPOB_CHLVU no original description	-1.8919	0.0207806
11764654	glyma01g00990	nearly identical (2013)AT4G29380| Symbols: | protein kinase family protein / WD-40 repeat family protein | chr4:14458828-14464698 FORWARD no original description	1.29716	0.059402
11764666	glyma01g01010	highly similar to ( 519)AT5G19730| Symbols: | pectinesterase family protein | chr5:6670564-6673204 FORWARDweakly similar to ( 167)PME_PRUPE no original description	1.04698	0.905243
11764676	glyma01g01020	weakly similar to ( 160)AT3G51100| Symbols: | similar to Os06g0713900 [Oryza sativa (japonica cultivar-group)] (GB:NP_001058569.1); similar to unknown protein [Oryza sativa (japonica cultivar-group)] (GB:BAD54105.1); similar to hypothetical protein OsI_023576 [Oryza sativa (indica cultivar-group)] (GB:EAZ02344.1) | chr3:18991511-18993154 REVERSE no original description	1.021	0.900563
11764684	glyma01g01040	no original description	1.18257	0.638017
11764691	glyma01g01060	highly similar to ( 728)AT4G29130| Symbols: GIN2, HXK1, ATHXK1 | ATHXK1 (GLUCOSE INSENSITIVE 2); ATP binding / hexokinase | chr4:14352344-14354871 REVERSEhighly similar to ( 712)HXK1_SPIOL no original description	-1.42179	0.268436
11764705	glyma01g01070	highly similar to ( 702)AT4G29130| Symbols: GIN2, HXK1, ATHXK1 | ATHXK1 (GLUCOSE INSENSITIVE 2); ATP binding / hexokinase | chr4:14352344-14354871 REVERSEhighly similar to ( 678)HXK1_SPIOL no original description	-1.04441	0.943551
11764716	glyma01g01120	highly similar to ( 819)AT1G69770| Symbols: CMT3 | CMT3 (CHROMOMETHYLASE 3) | chr1:26252159-26257182 REVERSEhighly similar to ( 785)CMT1_MAIZE no original description	1.46293	0.264262
11764739	glyma01g01130	highly similar to ( 770)AT2G19880| Symbols: | ceramide glucosyltransferase, putative | chr2:8588660-8592200 FORWARD no original description	1.16889	0.738802
11764754	glyma01g01150	moderately similar to ( 344)AT3G21600| Symbols: | senescence/dehydration-associated protein-related | chr3:7607084-7608371 REVERSE no original description	1.01696	0.970685
11764762	glyma01g01160	nearly identical (1152)AT3G28345| Symbols: | ABC transporter family protein | chr3:10595158-10600012 REVERSEnearly identical (1199)MDR_ORYSA no original description	-1.01597	0.97974
11764772	glyma01g01170	moderately similar to ( 483)AT1G35190| Symbols: | oxidoreductase, 2OG-Fe(II) oxygenase family protein | chr1:12890522-12892610 FORWARDweakly similar to ( 107)FLS_PETHY no original description	1.06786	0.889275
11764792	glyma01g01220	weakly similar to ( 157)AT3G18760| Symbols: | ribosomal protein S6 family protein | chr3:6457936-6459564 REVERSE no original description	-1.24904	0.542133
11764798	glyma01g01260	weakly similar to ( 150)AT2G25770| Symbols: | similar to unknown protein [Arabidopsis thaliana] (TAIR:AT4G32870.1); similar to hypothetical protein [Vitis vinifera] (GB:CAN83252.1); contains domain SSF55961 (SSF55961) | chr2:11000065-11000568 FORWARD no original description	-5.96922	0.0275284
11764802	glyma01g01270	nearly identical (1092)AT5G19690| Symbols: STT3A | STT3A (STAUROSPORIN AND TEMPERATURE SENSITIVE 3-LIKE A); oligosaccharyl transferase | chr5:6652651-6658216 FORWARD no original description	1.07926	0.702517
11764828	glyma01g01290	weakly similar to ( 111)AT1G32100| Symbols: | pinoresinol-lariciresinol reductase, putative | chr1:11546452-11547933 REVERSE no original description	-1.4978	0.151372
11764836	glyma01g01310	no original description	-1.43635	0.248339
11764842	glyma01g01330	no original description	-1.0918	0.788198
11764849	glyma01g01390	highly similar to ( 677)AT1G31970| Symbols: STRS1 | STRS1 (STRESS RESPONSE SUPPRESSOR 1); ATP-dependent helicase | chr1:11479901-11482687 FORWARDmoderately similar to ( 310)DB10_NICSY no original description	-1.01801	0.90279
11764864	glyma01g01400	moderately similar to ( 417)AT3G07040| Symbols: RPS3, RPM1 | RPM1 (RESISTANCE TO P. SYRINGAE PV MACULICOLA 1); protein binding | chr3:2226250-2229030 REVERSE no original description	1.40635	0.351269
11764868	glyma01g01410	weakly similar to ( 160)AT1G33810| Symbols: | similar to unknown [Populus trichocarpa] (GB:ABK94119.1) | chr1:12265064-12266635 FORWARD no original description	-1.32932	0.282471
11764874	glyma01g01420	moderately similar to ( 388)AT3G07040| Symbols: RPS3, RPM1 | RPM1 (RESISTANCE TO P. SYRINGAE PV MACULICOLA 1); protein binding | chr3:2226250-2229030 REVERSE no original description	1.8598	0.137659
11764880	glyma01g01440	weakly similar to ( 176)AT1G31940| Symbols: | similar to unknown protein [Arabidopsis thaliana] (TAIR:AT2G35585.1); similar to hypothetical protein [Vitis vinifera] (GB:CAN79460.1) | chr1:11470273-11471134 REVERSE no original description	1.6291	0.0233869
11764886	glyma01g01460	highly similar to ( 598)AT5G45620| Symbols: | 26S proteasome regulatory subunit, putative (RPN9) | chr5:18518817-18521095 FORWARD no original description	-1.10827	0.263379
11764895	glyma01g01480	highly similar to ( 711)AT1G31920| Symbols: | pentatricopeptide (PPR) repeat-containing protein | chr1:11461844-11463664 REVERSEvery weakly similar to (81.6)RF1_ORYSA no original description	-3.46745	0.0188334
11764898	glyma01g01490	weakly similar to ( 187)AT4G19003| Symbols: | similar to unnamed protein product [Vitis vinifera] (GB:CAO63315.1); contains InterPro domain ESCRT-II complex, vps25 subunit (InterPro:IPR008570); contains InterPro domain ESCRT-II complex, vps25 subunit, C-terminal winged helix (InterPro:IPR014040); contains InterPro domain ESCRT-II complex, vps25 subunit, N-terminal winged helix (InterPro:IPR014041…	-1.17201	0.530924
11764906	glyma01g01520	moderately similar to ( 483)AT1G31920| Symbols: | pentatricopeptide (PPR) repeat-containing protein | chr1:11461844-11463664 REVERSE no original description	-2.17189	0.0687504
11764911	glyma01g01560	weakly similar to ( 185)AT3G14470| Symbols: | disease resistance protein (NBS-LRR class), putative | chr3:4857947-4861111 FORWARD no original description	1.23343	0.575548
11764920	glyma01g01600	moderately similar to ( 423)AT1G32160| Symbols: | similar to unknown protein [Arabidopsis thaliana] (TAIR:AT3G17800.1); similar to unknown protein [Arabidopsis thaliana] (TAIR:AT3G17800.2); similar to unnamed protein product [Vitis vinifera] (GB:CAO63331.1); contains InterPro domain Protein of unknown function DUF760 (InterPro:IPR008479) | chr1:11568681-11570221 FORWARD no original description	1.34001	0.206927
11764927	glyma01g01610	moderately similar to ( 438)AT1G32130| Symbols: | similar to IWS1 C-terminus family protein [Arabidopsis thaliana] (TAIR:AT4G19000.1); similar to hypothetical protein [Vitis vinifera] (GB:CAN83660.1); contains InterPro domain IWS1, C-terminal (InterPro:IPR008654) | chr1:11559126-11561766 REVERSE no original description	1.15931	0.303652
11764953	glyma01g01630	moderately similar to ( 231)AT4G16070| Symbols: | lipase class 3 family protein | chr4:9096820-9100608 REVERSE no original description	1.79215	0.197885
11764961	glyma01g01650	weakly similar to ( 146)AT3G18670| Symbols: | ankyrin repeat family protein | chr3:6424141-6426477 REVERSE no original description	-1.02866	0.947359
11764969	glyma01g01700	moderately similar to ( 322)AT3G18670| Symbols: | ankyrin repeat family protein | chr3:6424141-6426477 REVERSE no original description	1.12239	0.56959
11764976	glyma01g01750	moderately similar to ( 341)AT2G35540| Symbols: | DNAJ heat shock N-terminal domain-containing protein | chr2:14934237-14936009 FORWARD no original description	-1.0715	0.826461
11764980	glyma01g01770	moderately similar to ( 451)AT1G32170| Symbols: XTH30, XTR4 | XTR4 (XYLOGLUCAN ENDOTRANSGLYCOSYLASE 4); hydrolase, acting on glycosyl bonds | chr1:11575414-11577756 FORWARDmoderately similar to ( 202)XTH_TOBAC no original description	1.78464	0.0710532
11764988	glyma01g01830	moderately similar to ( 340)AT1G32220| Symbols: | binding / catalytic/ coenzyme binding | chr1:11608018-11609571 FORWARD no original description	-1.39739	0.329558
11764997	glyma01g01850	highly similar to ( 766)AT5G46880| Symbols: HB-7 | HB-7 (homeobox-7); DNA binding / transcription factor | chr5:19048767-19052615 FORWARD no original description	-1.27015	0.107679
11765010	glyma01g01860	highly similar to ( 814)AT5G46910| Symbols: | transcription factor jumonji (jmj) family protein | chr5:19065007-19068107 FORWARD no original description	1.32946	0.251273
11765023	glyma01g01870	very weakly similar to (81.3)AT1G32240| Symbols: KAN2 | KAN2 (KANADI 2); DNA binding / transcription factor | chr1:11625862-11630335 REVERSE no original description	-2.13251	0.0364656
11765028	glyma01g01890	moderately similar to ( 421)AT2G35500| Symbols: | shikimate kinase-related | chr2:14921117-14922988 FORWARD no original description	-1.83674	0.0892002
11765039	glyma01g01910	moderately similar to ( 243)AT2G35490| Symbols: | plastid-lipid associated protein PAP, putative | chr2:14919388-14920876 REVERSEmoderately similar to ( 320)PG1_PEA no original description	-1.45241	0.0795314
11765045	glyma01g01940	no original description	1.67352	0.112199
11765051	glyma01g01960	moderately similar to ( 288)AT5G46860| Symbols: ATVAM3, SYP22, ATSYP22, SGR3, VAM3 | VAM3 (syntaxin 22); SNAP receptor | chr5:19029569-19031022 REVERSE no original description	1.29033	0.277184
11765061	glyma01g01970	very weakly similar to (90.9)AT1G32310| Symbols: | similar to unknown protein [Oryza sativa] (GB:AAL67597.1) | chr1:11653599-11654518 FORWARD no original description	-1.023	0.940478
11765070	glyma01g02050	moderately similar to ( 278)AT4G18230| Symbols: | similar to unnamed protein product [Vitis vinifera] (GB:CAO66912.1); contains InterPro domain Oligosaccharide biosynthesis protein Alg14 like (InterPro:IPR013969) | chr4:10080532-10081721 REVERSE no original description	1.12946	0.3197
11765081	glyma01g02060	nearly identical (1895)AT4G25960| Symbols: PGP2 | PGP2 (P-GLYCOPROTEIN 2); ATPase, coupled to transmembrane movement of substances | chr4:13177447-13183434 FORWARDhighly similar to ( 979)MDR_ORYSA no original description	-1.62173	0.128298
11765095	glyma01g02070	moderately similar to ( 245)AT5G16770| Symbols: AtMYB9 | AtMYB9 (myb domain protein 9); DNA binding | chr5:5515212-5516737 FORWARDmoderately similar to ( 201)MYB38_MAIZE no original description	1.65134	0.115302
11765100	glyma01g02090	moderately similar to ( 341)AT4G17790| Symbols: | similar to unknown protein [Arabidopsis thaliana] (TAIR:AT1G71940.1); similar to hypothetical protein 23.t00026 [Brassica oleracea] (GB:ABD65614.1); contains InterPro domain SNARE associated Golgi protein (InterPro:IPR015414) | chr4:9891438-9892688 FORWARD no original description	1.03752	0.879413
11765107	glyma01g02120	moderately similar to ( 266)AT2G23910| Symbols: | cinnamoyl-CoA reductase-related | chr2:10184982-10186869 FORWARDweakly similar to ( 112)DFRA_MAIZE no original description	1.46881	0.194087
11765115	glyma01g02130	weakly similar to ( 169)AT4G17920| Symbols: | zinc finger (C3HC4-type RING finger) family protein | chr4:9963233-9964102 REVERSE no original description	1.05842	0.846639
11765117	glyma01g02160	weakly similar to ( 178)AT5G46700| Symbols: TET1, TRN2 | TET1/TRN2 (TETRASPANIN2) | chr5:18968262-18969666 FORWARD no original description	1.2498	0.375526
11765119	glyma01g02170	weakly similar to ( 149)AT5G46700| Symbols: TET1, TRN2 | TET1/TRN2 (TETRASPANIN2) | chr5:18968262-18969666 FORWARD no original description	-1.2372	0.58055
11765122	glyma01g02190	very weakly similar to (89.4)AT1G32690| Symbols: | similar to unknown protein [Arabidopsis thaliana] (TAIR:AT2G35200.1); similar to hypothetical protein [Vitis vinifera] (GB:CAN63850.1) | chr1:11821059-11821661 REVERSE no original description	-1.08162	0.816851
11765125	glyma01g02200	weakly similar to ( 110)AT5G46720| Symbols: | similar to unknown protein [Arabidopsis thaliana] (TAIR:AT3G02910.1); similar to Os03g0854000 [Oryza sativa (japonica cultivar-group)] (GB:NP_001051934.1); similar to predicted protein [Physcomitrella patens subsp. patens] (GB:EDQ78254.1); contains InterPro domain Butirosin biosynthesis, BtrG-like (InterPro:IPR013024); contains InterPro domain Protein…	1.25073	0.263401
11765129	glyma01g02250	moderately similar to ( 231)AT1G32640| Symbols: RD22BP1, JAI1, JIN1, MYC2, ZBF1, ATMYC2 | ATMYC2 (JASMONATE INSENSITIVE 1); DNA binding / transcription factor | chr1:11799022-11800893 REVERSE no original description	-1.84936	0.0266738
11765133	glyma01g02260	no original description	1.24871	0.431921
11765135	glyma01g02280	no original description	-1.0178	0.928793
11765140	glyma01g02360	very weakly similar to (92.8)AT5G65660| Symbols: | hydroxyproline-rich glycoprotein family protein | chr5:26262670-26263471 REVERSE no original description	-1.09822	0.771633
11765145	glyma01g02380	weakly similar to ( 155)AT3G53440| Symbols: | DNA binding | chr3:19821914-19823452 FORWARD no original description	-1.11306	0.788554
11765153	glyma01g02440	moderately similar to ( 385)AT3G55100| Symbols: | ABC transporter family protein | chr3:20431329-20433317 REVERSEweakly similar to ( 193)PDR15_ORYSA no original description	1.02905	0.931368
11765166	glyma01g02460	moderately similar to ( 276)AT2G37050| Symbols: | similar to leucine-rich repeat family protein / protein kinase family protein [Arabidopsis thaliana] (TAIR:AT1G67720.1); similar to leucine-rich repeat family protein, putative, expressed [Oryza sativa (japonica cultivar-group)] (GB:ABA95578.2); similar to hypothetical protein [Vitis vinifera] (GB:CAN67050.1); similar to unnamed protein product [V…	1.28852	0.369914
11765177	glyma01g02510	no original description	1.02286	0.945704
11765180	glyma01g02550	weakly similar to ( 105)AT5G10530| Symbols: | lectin protein kinase, putative | chr5:3324979-3326934 REVERSEweakly similar to ( 147)LEC_SOYBN no original description	-1.01201	0.962622
11765182	glyma01g02560	highly similar to ( 704)AT2G22620| Symbols: | lyase | chr2:9611982-9617236 REVERSE no original description	-1.85321	0.113011
11765198	glyma01g02580	moderately similar to ( 434)AT4G37990| Symbols: ELI3, ELI3-2 | ELI3-2 (ELICITOR-ACTIVATED GENE 3) | chr4:17855958-17857382 FORWARDhighly similar to ( 530)MTDH_FRAAN no original description	53.0212	0.0296867
11765207	glyma01g02610	weakly similar to ( 116)AT5G65590| Symbols: | Dof-type zinc finger domain-containing protein | chr5:26229310-26230260 REVERSEweakly similar to ( 110)PBF_MAIZE no original description	-2.2634	0.118364
11765212	glyma01g02630	highly similar to ( 652)AT4G38040| Symbols: | exostosin family protein | chr4:17867495-17869125 FORWARD no original description	-1.03839	0.445349
11765221	glyma01g02650	moderately similar to ( 331)AT5G65560| Symbols: | pentatricopeptide (PPR) repeat-containing protein | chr5:26218238-26220985 REVERSEweakly similar to ( 142)RF1_ORYSA no original description	-1.05233	0.842377
11765223	glyma01g02670	moderately similar to ( 283)AT1G22360| Symbols: ATUGT85A2 | ATUGT85A2 (UDP-GLUCOSYL TRANSFERASE 85A2); UDP-glycosyltransferase | chr1:7895057-7897516 REVERSEweakly similar to ( 157)UFOG_HORVU no original description	4.5282	0.0243009
11765227	glyma01g02680	no original description	-1.02783	0.877638
11765231	glyma01g02700	weakly similar to ( 124)AT1G22360| Symbols: ATUGT85A2 | ATUGT85A2 (UDP-GLUCOSYL TRANSFERASE 85A2); UDP-glycosyltransferase | chr1:7895057-7897516 REVERSEvery weakly similar to (94.7)ZOX_PHAVU no original description	1.27563	0.280108
11765240	glyma01g02720	weakly similar to ( 150)AT1G51060| Symbols: HTA10 | HTA10; DNA binding | chr1:18930616-18931111 FORWARDweakly similar to ( 146)H2A3_ORYSA no original description	-1.1122	0.70797
11765247	glyma01g02740	moderately similar to ( 303)AT1G22380| Symbols: ATUGT85A3 | ATUGT85A3 (UDP-GLUCOSYL TRANSFERASE 85A3); glucuronosyltransferase/ transcription factor/ transferase, transferring glycosyl groups | chr1:7900511-7902321 REVERSEweakly similar to ( 150)UFOG_SOLME no original description	1.6589	0.0781892
11765250	glyma01g02750	highly similar to ( 515)AT5G65530| Symbols: | protein kinase, putative | chr5:26208070-26210052 REVERSEweakly similar to ( 182)NORK_PEA no original description	1.04228	0.921354
11765259	glyma01g02780	highly similar to ( 664)AT5G65500| Symbols: | protein kinase family protein | chr5:26198319-26201223 REVERSEvery weakly similar to (92.0)KPRO_MAIZE no original description	1.8448	0.024786
11765270	glyma01g02800	moderately similar to ( 445)AT5G65490| Symbols: | Identical to SGT1 protein homolog At5g65490 [Arabidopsis Thaliana] (GB:Q9LSM5); similar to hypothetical protein [Vitis vinifera] (GB:CAN64607.1); contains InterPro domain SGT1 (InterPro:IPR010770) | chr5:26195229-26197535 REVERSE no original description	-1.13629	0.37304
11765278	glyma01g02830	weakly similar to ( 135)AT4G38070| Symbols: | bHLH family protein | chr4:17876529-17882563 FORWARD no original description	1.01827	0.97533
11765280	glyma01g02840	highly similar to ( 616)AT5G10490| Symbols: MSL2 | MSL2 (MSCS-LIKE 2) | chr5:3300377-3303837 REVERSE no original description	2.31959	0.0479986
11765302	glyma01g02870	no original description	1.78888	0.0123063
11765306	glyma01g02890	nearly identical (1594)AT5G65460| Symbols: | kinesin motor protein-related | chr5:26179057-26186227 REVERSEweakly similar to ( 118)FLA10_CHLRE no original description	-1.30237	0.193109
11765332	glyma01g02900	highly similar to ( 890)AT2G22530| Symbols: | transferase | chr2:9580051-9584521 REVERSE no original description	1.40309	0.0943204
11765357	glyma01g02920	very weakly similar to (98.2)AT5G09540| Symbols: | DNAJ heat shock N-terminal domain-containing protein | chr5:2962423-2963265 REVERSE no original description	-1.22425	0.414642
11765361	glyma01g02930	weakly similar to ( 128)AT4G38070| Symbols: | bHLH family protein | chr4:17876529-17882563 FORWARD no original description	1.1841	0.738317
11765364	glyma01g02950	moderately similar to ( 399)AT2G22500| Symbols: | mitochondrial substrate carrier family protein | chr2:9570611-9571552 REVERSE no original description	-2.18879	0.0223407
11765372	glyma01g02990	no original description	1.29306	0.159373
11765389	glyma01g03030	moderately similar to ( 266)AT5G65420| Symbols: CYCD4;1 | CYCD4;1 (CYCLIN D4;1); cyclin-dependent protein kinase regulator | chr5:26158818-26160976 REVERSE no original description	-1.09465	0.586254
11765397	glyma01g03050	no original description	1.095	0.833523
11765400	glyma01g03070	no original description	1.10305	0.254221
11765404	glyma01g03090	highly similar to ( 635)AT5G65380| Symbols: | ripening-responsive protein, putative | chr5:26140467-26143578 REVERSE no original description	-1.56604	0.213101
11765413	glyma01g03100	highly similar to ( 705)AT1G67900| Symbols: | phototropic-responsive NPH3 family protein | chr1:25471400-25473551 FORWARDweakly similar to ( 135)NPH3_ORYSA no original description	-4.86855	0.0194258
11765420	glyma01g03110	no original description	1.28354	0.399315
11765427	glyma01g03180	moderately similar to ( 208)AT1G70600| Symbols: | 60S ribosomal protein L27A (RPL27aC) | chr1:26624831-26625271 REVERSE no original description	-1.81998	0.0451428
11765433	glyma01g03200	moderately similar to ( 303)AT2G42490| Symbols: | copper amine oxidase, putative | chr2:17698678-17702604 REVERSE no original description	-1.27272	0.210715
11765441	glyma01g03210	highly similar to ( 654)AT3G26600| Symbols: | armadillo/beta-catenin repeat family protein | chr3:9771126-9772973 FORWARD no original description	2.27122	0.0867977
11765444	glyma01g03250	moderately similar to ( 254)AT5G56090| Symbols: COX15 | COX15 (CYTOCHROME C OXIDASE 15) | chr5:22731860-22733831 FORWARD no original description	1.01949	0.933481
11765453	glyma01g03270	highly similar to ( 525)AT1G10700| Symbols: | ribose-phosphate pyrophosphokinase 3 / phosphoribosyl diphosphate synthetase 3 (PRS3) | chr1:3554158-3556275 FORWARDhighly similar to ( 543)KPRS3_SPIOL no original description	-2.76404	0.0194258
11765470	glyma01g03320	moderately similar to ( 328)AT1G51940| Symbols: | protein kinase family protein / peptidoglycan-binding LysM domain-containing protein | chr1:19299761-19302610 REVERSEweakly similar to ( 168)NORK_MEDTR no original description	-1.07075	0.89853
11765482	glyma01g03330	highly similar to ( 582)AT1G60780| Symbols: | clathrin adaptor complexes medium subunit family protein | chr1:22372954-22375550 REVERSE no original description	1.29999	0.154659
11765499	glyma01g03410	moderately similar to ( 351)AT1G70530| Symbols: | protein kinase family protein | chr1:26592413-26595042 REVERSEvery weakly similar to (98.6)NORK_MEDTR no original description	-1.04371	0.901452
11765513	glyma01g03420	highly similar to ( 863)AT1G70520| Symbols: | protein kinase family protein | chr1:26588551-26590997 REVERSEweakly similar to ( 200)NORK_MEDTR no original description	-1.22107	0.166934
11765521	glyma01g03440	no original description	1.20508	0.650087
11765532	glyma01g03470	weakly similar to ( 166)NO36A_SOYBN no original description	1.34793	0.422785
11765536	glyma01g03540	moderately similar to ( 350)AT5G05670| Symbols: | signal recognition particle binding | chr5:1695917-1697535 REVERSE no original description	-1.02687	0.938426
11765545	glyma01g03570	moderately similar to ( 245)AT2G47110| Symbols: UBQ6 | UBQ6 (ubiquitin 6); protein binding | chr2:19351771-19352244 FORWARDweakly similar to ( 147)UBIQ_WHEAT no original description	-1.299	0.378384
11765549	glyma01g03580	weakly similar to ( 177)AT1G23420| Symbols: INO | INO (INNER NO OUTER); transcription factor | chr1:8317412-8319093 FORWARDvery weakly similar to ( 100)YAB1_ORYSA no original description	-1.3049	0.285934
11765558	glyma01g03600	moderately similar to ( 330)AT1G10650| Symbols: | protein binding / zinc ion binding | chr1:3524123-3525061 REVERSE no original description	1.1221	0.735175
11765566	glyma01g03610	highly similar to ( 564)AT2G46290| Symbols: | eukaryotic translation initiation factor 3 subunit 2, putative / eIF-3 beta, putative / eIF3i, putative | chr2:19012983-19014870 REVERSE no original description	1.15391	0.249349
11765582	glyma01g03650	moderately similar to ( 307)AT1G70490| Symbols: ATARFA1D | ATARFA1D | chr1:26567825-26568815 REVERSEmoderately similar to ( 307)ARF_VIGUN no original description	1.5239	0.137964
11765593	glyma01g03670	no original description	1.0765	0.743472
11765604	glyma01g03700	weakly similar to ( 150)AT1G70420| Symbols: | similar to unknown protein [Arabidopsis thaliana] (TAIR:AT1G23710.1); similar to unnamed protein product [Vitis vinifera] (GB:CAO66069.1); contains InterPro domain Protein of unknown function DUF1645 (InterPro:IPR012442) | chr1:26543503-26544321 REVERSE no original description	2.41544	0.0542264
11765608	glyma01g03720	moderately similar to ( 379)AT5G14740| Symbols: CA18, BETA CA2, CA2 | CA2 (BETA CARBONIC ANHYDRASE 2) | chr5:4758260-4762318 FORWARDmoderately similar to ( 400)CAHC_TOBAC no original description	-1.71192	0.0740481
11765623	glyma01g03750	moderately similar to ( 217)AT1G23750| Symbols: | DNA-binding protein-related | chr1:8400627-8401160 FORWARD no original description	-1.25374	0.413498
11765627	glyma01g03760	highly similar to ( 716)AT1G70370| Symbols: | BURP domain-containing protein / polygalacturonase, putative | chr1:26516666-26518661 REVERSE no original description	-4.32392	0.0287341
11765637	glyma01g03780	no original description	-1.15342	0.531001
11765641	glyma01g03790	moderately similar to ( 489)AT1G23790| Symbols: | similar to unknown protein [Arabidopsis thaliana] (TAIR:AT1G70340.1); similar to unnamed protein product [Vitis vinifera] (GB:CAO40888.1); contains InterPro domain Protein of unknown function DUF936, plant (InterPro:IPR010341) | chr1:8410088-8411906 FORWARD no original description	-1.17641	0.573573
11765649	glyma01g03810	moderately similar to ( 284)AT1G60200| Symbols: | splicing factor PWI domain-containing protein / RNA recognition motif (RRM)-containing protein | chr1:22204547-22208906 REVERSE no original description	-1.12872	0.181601
11765658	glyma01g03830	highly similar to ( 526)AT1G23820| Symbols: SPDS1 | SPDS1 (SPERMIDINE SYNTHASE 1) | chr1:8420267-8422713 FORWARDhighly similar to ( 570)SPD1_PEA no original description	-1.14906	0.626154
11765670	glyma01g03850	nearly identical (1126)AT1G70300| Symbols: KUP6 | KUP6 (K+ uptake permease 6); potassium ion transmembrane transporter | chr1:26481656-26484896 REVERSEhighly similar to ( 943)HAK9_ORYSA no original description	1.32023	0.0489501
11765685	glyma01g03870	nearly identical (1358)AT1G23870| Symbols: TPS9, ATTPS9 | ATTPS9 (Arabidopsis thaliana trehalose-phosphatase/synthase 9); transferase, transferring glycosyl groups / trehalose-phosphatase | chr1:8432684-8435495 FORWARD no original description	-1.07846	0.872529
11765690	glyma01g03880	highly similar to ( 528)AT1G70280| Symbols: | NHL repeat-containing protein | chr1:26469749-26472134 REVERSE no original description	-1.22751	0.284552
11765700	glyma01g03890	nearly identical (1278)AT1G60070| Symbols: | clathrin binding | chr1:22146609-22152961 REVERSE no original description	-1.00709	0.977789
11765720	glyma01g03920	highly similar to ( 600)AT5G17680| Symbols: | disease resistance protein (TIR-NBS-LRR class), putative | chr5:5823001-5827155 FORWARD no original description	3.19878	0.021087
11765728	glyma01g03930	nearly identical (1101)AT5G26830| Symbols: | threonyl-tRNA synthetase / threonine--tRNA ligase (THRRS) | chr5:9437354-9441571 FORWARD no original description	-1.43752	0.123307
11765753	glyma01g03980	highly similar to ( 506)AT5G17680| Symbols: | disease resistance protein (TIR-NBS-LRR class), putative | chr5:5823001-5827155 FORWARD no original description	-1.0519	0.735739
11765766	glyma01g04000	moderately similar to ( 491)AT5G17680| Symbols: | disease resistance protein (TIR-NBS-LRR class), putative | chr5:5823001-5827155 FORWARD no original description	1.50255	0.117862
11765782	glyma01g04040	moderately similar to ( 206)AT5G40210| Symbols: | nodulin MtN21 family protein | chr5:16090953-16093316 REVERSE no original description	-1.32899	0.289599
11765792	glyma01g04050	weakly similar to ( 180)AT5G40240| Symbols: | nodulin MtN21 family protein | chr5:16099553-16101694 REVERSE no original description	-3.10557	0.0104281
11765802	glyma01g04060	weakly similar to ( 166)AT5G40240| Symbols: | nodulin MtN21 family protein | chr5:16099553-16101694 REVERSE no original description	-1.08179	0.823879
11765813	glyma01g04080	highly similar to ( 595)AT1G24030| Symbols: | protein kinase family protein | chr1:8503383-8505184 FORWARDmoderately similar to ( 223)NORK_MEDTR no original description	-1.55819	0.236749
11765821	glyma01g04110	moderately similar to ( 268)AT1G70230| Symbols: | similar to unknown protein [Arabidopsis thaliana] (TAIR:AT1G01430.1); similar to Os09g0375300 [Oryza sativa (japonica cultivar-group)] (GB:NP_001063036.1); similar to Os06g0235200 [Oryza sativa (japonica cultivar-group)] (GB:NP_001057240.1); similar to leaf senescence protein-like [Oryza sativa (japonica cultivar-group)] (GB:BAD26032.1); contains …	-1.23003	0.400932
11765825	glyma01g04160	highly similar to ( 858)AT1G60030| Symbols: | xanthine/uracil permease family protein | chr1:22117658-22120313 REVERSE no original description	1.01728	0.968887
11765841	glyma01g04170	moderately similar to ( 443)AT1G07420| Symbols: ATSMO1, ATSMO2-2, ATSMO2, SMO2-2 | SMO2-2 (sterol 4-alpha-methyl-oxidase 2); C-4 methylsterol oxidase | chr1:2278915-2280030 FORWARD no original description	1.02274	0.949927
11765856	glyma01g04190	weakly similar to ( 157)AT1G60010| Symbols: | similar to unknown protein [Arabidopsis thaliana] (TAIR:AT1G10530.1); similar to unnamed protein product [Vitis vinifera] (GB:CAO40951.1) | chr1:22099325-22100099 REVERSE no original description	1.54502	0.309123
11765862	glyma01g04200	moderately similar to ( 357)AT3G14470| Symbols: | disease resistance protein (NBS-LRR class), putative | chr3:4857947-4861111 FORWARD no original description	1.15033	0.637282
11765864	glyma01g04230	weakly similar to ( 171)AT1G70200| Symbols: | RNA recognition motif (RRM)-containing protein | chr1:26436177-26438014 REVERSE no original description	-1.7383	0.273532
11765871	glyma01g04240	moderately similar to ( 357)AT3G14470| Symbols: | disease resistance protein (NBS-LRR class), putative | chr3:4857947-4861111 FORWARD no original description	2.29746	0.0359596
11765882	glyma01g04370	weakly similar to ( 150)AT1G59970| Symbols: | matrixin family protein | chr1:22077266-22078348 FORWARDweakly similar to ( 131)MEP1_SOYBN no original description	1.53222	0.20819
11765884	glyma01g04390	no original description	1.10607	0.778913
11765889	glyma01g04420	very weakly similar to (82.0)AT1G59940| Symbols: ARR3 | ARR3 (RESPONSE REGULATOR 3); transcription regulator/ two-component response regulator | chr1:22069559-22070560 REVERSE no original description	-1.05084	0.859689
11765895	glyma01g04430	moderately similar to ( 457)AT1G70140| Symbols: ATFH8 | ATFH8 (FORMIN 8); actin binding / actin filament binding / profilin binding | chr1:26416351-26418711 REVERSE no original description	2.50603	0.0487604
11765898	glyma01g04450	moderately similar to ( 234)AT1G10460| Symbols: GLP7 | GLP7 (GERMIN-LIKE PROTEIN 7); manganese ion binding / metal ion binding / nutrient reservoir | chr1:3439579-3440232 REVERSEweakly similar to ( 164)NEC1_NICPL no original description	-1.14746	0.237727
11765901	glyma01g04500	moderately similar to ( 379)AT1G27210| Symbols: | binding | chr1:9455656-9457904 REVERSE no original description	-1.39948	0.289899
11765908	glyma01g04510	highly similar to ( 524)AT1G27200| Symbols: | similar to unknown protein [Arabidopsis thaliana] (TAIR:AT5G40720.1); similar to unknown [Populus trichocarpa] (GB:ABK95005.1); contains InterPro domain Protein of unknown function DUF23 (InterPro:IPR008166) | chr1:9449799-9451526 REVERSE no original description	1.34746	0.285698
11765912	glyma01g04530	moderately similar to ( 214)AT1G70000| Symbols: | DNA-binding family protein | chr1:26367337-26368298 REVERSE no original description	-1.96254	0.0411494
11765939	glyma01g04560	weakly similar to ( 133)AT1G69980| Symbols: | similar to unnamed protein product [Vitis vinifera] (GB:CAO40983.1) | chr1:26360222-26361310 REVERSE no original description	-1.51848	0.108324
11765945	glyma01g04590	nearly identical (1139)AT1G27170| Symbols: | ATP binding / protein binding / transmembrane receptor | chr1:9434705-9439206 FORWARDvery weakly similar to (95.9)RPK1_IPONI no original description	-1.0817	0.811115
11765951	glyma01g04600	no original description	1.1973	0.170299
11765957	glyma01g04630	highly similar to ( 604)AT1G59650| Symbols: CW14 | CW14 | chr1:21923764-21926335 FORWARD no original description	-1.084	0.870817
11765970	glyma01g04660	highly similar to ( 786)AT5G62620| Symbols: | galactosyltransferase family protein | chr5:25154362-25156659 FORWARD no original description	-1.9548	0.0530722
11765981	glyma01g04690	moderately similar to ( 236)AT1G10360| Symbols: GST29, ATGSTU18 | ATGSTU18 (GLUTATHIONE S-TRANSFERASE 29); glutathione transferase | chr1:3395740-3396808 REVERSEmoderately similar to ( 203)GSTU6_ORYSA no original description	2.02782	0.0651562
11765986	glyma01g04700	very weakly similar to (91.7)AT1G10360| Symbols: GST29, ATGSTU18 | ATGSTU18 (GLUTATHIONE S-TRANSFERASE 29); glutathione transferase | chr1:3395740-3396808 REVERSE no original description	-1.01218	0.978987
11765993	glyma01g04710	moderately similar to ( 209)AT1G10360| Symbols: GST29, ATGSTU18 | ATGSTU18 (GLUTATHIONE S-TRANSFERASE 29); glutathione transferase | chr1:3395740-3396808 REVERSEweakly similar to ( 166)GSTU6_ORYSA no original description	-1.77073	0.289855
11765997	glyma01g04720	moderately similar to ( 430)AT1G27150| Symbols: | binding | chr1:9429164-9432055 FORWARD no original description	-1.09396	0.766189
11766009	glyma01g04730	moderately similar to ( 458)AT1G27100| Symbols: | similar to unknown protein [Arabidopsis thaliana] (TAIR:AT1G69900.1); similar to hypothetical protein [Vitis vinifera] (GB:CAN62089.1); contains InterPro domain Protein of unknown function DUF569 (InterPro:IPR007679); contains InterPro domain Actin-crosslinking proteins (InterPro:IPR008999) | chr1:9407544-9411061 REVERSE no original description	1.80556	0.0256447
11766017	glyma01g04740	moderately similar to ( 279)AT2G02590| Symbols: | similar to unnamed protein product [Vitis vinifera] (GB:CAO41025.1); contains InterPro domain Putative small multi-drug export (InterPro:IPR009577) | chr2:704976-706493 FORWARD no original description	-1.69903	0.271405
11766022	glyma01g04750	moderately similar to ( 309)AT1G59725| Symbols: | DNAJ heat shock protein, putative | chr1:21954403-21955875 FORWARDvery weakly similar to (90.5)DNJH_CUCSA no original description	-1.17949	0.231228
11766035	glyma01g04860	moderately similar to ( 270)AT1G27070| Symbols: | 5'-AMP-activated protein kinase-related | chr1:9396932-9399212 REVERSE no original description	-2.04593	0.17972
11766044	glyma01g04900	highly similar to ( 748)AT1G69850| Symbols: NTL1, ATNRT1:2 | ATNRT1:2 (NITRATE TRANSPORTER 1:2); calcium ion binding / transporter | chr1:26300608-26304070 REVERSE no original description	4.26766	0.0123231
11766052	glyma01g04930	highly similar to ( 674)AT5G15080| Symbols: | protein kinase, putative | chr5:4886417-4888558 FORWARDmoderately similar to ( 228)NORK_PEA no original description	-1.55357	0.0722227
11766061	glyma01g04950	moderately similar to ( 456)AT5G62740| Symbols: | band 7 family protein | chr5:25218546-25219761 FORWARD no original description	1.16038	0.611932
11766070	glyma01g04970	highly similar to ( 512)AT1G14420| Symbols: AT59 | AT59 (Arabidopsis homolog of tomato LAT59); lyase/ pectate lyase | chr1:4931839-4933400 REVERSEmoderately similar to ( 461)PEL_LILLO no original description	1.09537	0.590608
11766075	glyma01g05000	moderately similar to ( 222)AT1G14410| Symbols: ATWHY1, PTAC1 | ATWHY1/PTAC1 (A. THALIANA WHIRLY 1); DNA binding / telomeric DNA binding | chr1:4929347-4930805 REVERSE no original description	-1.72409	0.218939
11766084	glyma01g05020	moderately similar to ( 265)AT3G50310| Symbols: MAPKKK20 | MAPKKK20 (Mitogen-activated protein kinase kinase kinase 20); kinase | chr3:18659278-18660306 REVERSEvery weakly similar to (87.8)M2K1_ORYSA no original description	-1.10038	0.755111
11766089	glyma01g05030	no original description	1.36674	0.49762
11766096	glyma01g05050	weakly similar to ( 163)AT1G18860| Symbols: ATWRKY61, WRKY61 | WRKY61 (WRKY DNA-binding protein 61); transcription factor | chr1:6509485-6511200 FORWARD no original description	-1.09836	0.819407
11766102	glyma01g05060	moderately similar to ( 494)AT1G69800| Symbols: | CBS domain-containing protein | chr1:26278079-26279988 REVERSE no original description	1.27279	0.555065
11766110	glyma01g05080	moderately similar to ( 284)AT2G02760| Symbols: UBC2, ATUBC2 | ATUBC2 (UBIQUITING-CONJUGATING ENZYME 2); ubiquitin-protein ligase | chr2:774270-775148 FORWARDmoderately similar to ( 286)UBC2_MEDSA no original description	-1.13318	0.617486
11766117	glyma01g05100	weakly similar to ( 171)AT2G02790| Symbols: IQD29 | IQD29 (IQ-domain 29); calmodulin binding | chr2:788707-790945 FORWARD no original description	-1.67921	0.0655405
11766136	glyma01g05170	highly similar to ( 546)AT1G14360| Symbols: ATUTR3, UTR3 | ATUTR3/UTR3 (UDP-GALACTOSE TRANSPORTER 3); pyrimidine nucleotide sugar transmembrane transporter | chr1:4911357-4913024 REVERSE no original description	1.37269	0.0954342
11766159	glyma01g05280	very weakly similar to (82.0)AT1G22030| Symbols: | similar to unknown protein [Arabidopsis thaliana] (TAIR:AT1G77855.1); similar to unnamed protein product [Vitis vinifera] (GB:CAO61782.1) | chr1:7759326-7760404 REVERSE no original description	1.15221	0.519682
11766170	glyma01g05340	highly similar to ( 524)AT2G02870| Symbols: | kelch repeat-containing F-box family protein | chr2:838377-839780 FORWARD no original description	2.6936	0.0316621
11766176	glyma01g05350	no original description	2.42179	0.0616973
11766180	glyma01g05360	moderately similar to ( 206)AT2G02880| Symbols: | mucin-related | chr2:841302-843150 FORWARD no original description	1.25386	0.572003
11766194	glyma01g05470	highly similar to ( 719)AT2G46210| Symbols: | delta-8 sphingolipid desaturase, putative | chr2:18984615-18985964 FORWARD no original description	1.16602	0.678792
11766198	glyma01g05480	moderately similar to ( 477)AT1G26830| Symbols: CUL3A, ATCUL3A, ATCUL3, CUL3 | ATCUL3/ATCUL3A/CUL3/CUL3A (Cullin 3A); protein binding / ubiquitin-protein ligase | chr1:9296050-9298361 FORWARD no original description	1.06989	0.828732
11766215	glyma01g05540	moderately similar to ( 315)AT1G26840| Symbols: ORC6, ATORC6 | ATORC6/ORC6 (Origin recognition complex protein 6); DNA binding | chr1:9298809-9300590 FORWARD no original description	-1.34695	0.286824
11766227	glyma01g05550	moderately similar to ( 370)AT1G69640| Symbols: | acid phosphatase, putative | chr1:26197596-26199129 REVERSE no original description	1.4536	0.0945349
11766264	glyma01g05680	moderately similar to ( 306)AT1G26870| Symbols: ANAC009 | ANAC009 (Arabidopsis NAC domain containing protein 9); transcription factor | chr1:9312843-9314970 FORWARDweakly similar to ( 191)NAC68_ORYSA no original description	1.13432	0.555572
11766270	glyma01g05690	moderately similar to ( 300)AT5G17680| Symbols: | disease resistance protein (TIR-NBS-LRR class), putative | chr5:5823001-5827155 FORWARD no original description	1.071	0.771274
11766279	glyma01g05750	highly similar to ( 579)AT2G02970| Symbols: | nucleoside phosphatase family protein / GDA1/CD39 family protein | chr2:865394-868006 REVERSEweakly similar to ( 157)NTPA_PEA no original description	1.28093	0.209046
11766290	glyma01g05770	moderately similar to ( 375)AT5G22260| Symbols: MS1 | MS1 (MALE STERILITY 1); DNA binding | chr5:7367710-7370195 REVERSE no original description	-1.15586	0.546461
11766305	glyma01g05800	moderately similar to ( 216)AT2G02960| Symbols: | zinc finger (C3HC4-type RING finger) family protein | chr2:862345-863979 REVERSE no original description	1.69331	0.0122141
11766316	glyma01g05810	very weakly similar to ( 100)AT5G15210| Symbols: ATHB30, ZFHD3 | ATHB30/ZFHD3 (ZINC FINGER HOMEODOMAIN 3); DNA binding / transcription factor | chr5:4937877-4938692 REVERSE no original description	4.05335	0.0100867
11766319	glyma01g05820	moderately similar to ( 275)AT5G39785| Symbols: | structural constituent of ribosome | chr5:15946485-15949443 FORWARD no original description	1.03261	0.956141
11766328	glyma01g05830	highly similar to ( 857)AT2G02980| Symbols: | pentatricopeptide (PPR) repeat-containing protein | chr2:868467-870278 FORWARDvery weakly similar to (92.4)RF1_ORYSA no original description	-1.55463	0.358304
11766332	glyma01g05840	moderately similar to ( 319)AT2G02990| Symbols: RNS1 | RNS1 (RIBONUCLEASE 1); endoribonuclease | chr2:873713-874666 FORWARDweakly similar to ( 117)RN28_PANGI no original description	1.41082	0.276868
11766337	glyma01g05850	moderately similar to ( 343)AT1G14220| Symbols: | ribonuclease T2 family protein | chr1:4858637-4859596 REVERSEweakly similar to ( 115)RN28_PANGI no original description	-1.07503	0.702678
11766344	glyma01g05860	highly similar to ( 848)AT1G26810| Symbols: GALT1 | GALT1 (GALACTOSYLTRANSFERASE1); UDP-galactose:N-glycan beta-1,3-galactosyltransferase/ transferase, transferring glycosyl groups / transferase, transferring hexosyl groups | chr1:9286849-9289314 REVERSE no original description	2.974	0.0107509
11766355	glyma01g05880	weakly similar to ( 160)AT1G26800| Symbols: | zinc finger (C3HC4-type RING finger) family protein | chr1:9285563-9286177 REVERSE no original description	-1.78533	0.238954
11766365	glyma01g05960	moderately similar to ( 217)AT3G47500| Symbols: CDF3 | CDF3 (CYCLING DOF FACTOR 3); DNA binding / protein binding / transcription factor | chr3:17515261-17516949 REVERSEweakly similar to ( 101)MNB1A_MAIZE no original description	-2.41674	0.0147637
11766368	glyma01g05970	very weakly similar to (88.2)AT3G29000| Symbols: | calcium-binding EF hand family protein | chr3:11007028-11007612 FORWARD no original description	-1.08171	0.835585
11766384	glyma01g06050	weakly similar to ( 189)AT3G56050| Symbols: | protein kinase family protein | chr3:20809301-20811685 REVERSE no original description	1.0216	0.90676
11766389	glyma01g06100	very weakly similar to (84.0)AT5G15290| Symbols: | integral membrane family protein | chr5:4967097-4967849 FORWARD no original description	1.49876	0.488666
11766393	glyma01g06140	very weakly similar to (86.3)AT1G74440| Symbols: | similar to unknown protein [Arabidopsis thaliana] (TAIR:AT1G18720.1); similar to unknown [Populus trichocarpa] (GB:ABK94463.1); similar to hypothetical protein [Vitis vinifera] (GB:CAN69808.1); contains InterPro domain Protein of unknown function DUF962 (InterPro:IPR009305) | chr1:27982869-27984032 REVERSE no original description	-1.31688	0.445235
11766399	glyma01g06170	highly similar to ( 555)AT2G03150| Symbols: EMB1579 | EMB1579 (EMBRYO DEFECTIVE 1579); binding | chr2:952310-959001 FORWARD no original description	-1.16014	0.207264
11766423	glyma01g06180	no original description	1.26622	0.496405
11766428	glyma01g06190	weakly similar to ( 144)AT5G15310| Symbols: AtMYB16, AtMIXTA | AtMIXTA/AtMYB16 (myb domain protein 16) | chr5:4974897-4976109 FORWARDweakly similar to ( 104)ODO1_PETHY no original description	-1.1572	0.414683
11766447	glyma01g06250	no original description	-1.1932	0.672818
11766453	glyma01g06260	very weakly similar to (91.7)AT1G26750| Symbols: | similar to unnamed protein product [Vitis vinifera] (GB:CAO68449.1); similar to hypothetical protein [Vitis vinifera] (GB:CAN72786.1) | chr1:9246844-9248040 FORWARD no original description	-1.00304	0.992143
11766470	glyma01g06350	moderately similar to ( 250)AT1G69450| Symbols: | similar to HYP1 (HYPOTHETICAL PROTEIN 1) [Arabidopsis thaliana] (TAIR:AT3G01100.1); similar to unnamed protein product [Vitis vinifera] (GB:CAO64743.1); similar to unnamed protein product [Vitis vinifera] (GB:CAO15025.1); similar to Protein of unknown function DUF221 [Medicago truncatula] (GB:ABN08272.1); contains InterPro domain Protein of unknow…	1.03897	0.952598
11766483	glyma01g06370	nearly identical (1252)AT1G69440| Symbols: ZIP, AGO7 | AGO7 (ARGONAUTE7); nucleic acid binding | chr1:26105228-26108679 REVERSE no original description	-1.44327	0.140733
11766511	glyma01g06530	moderately similar to ( 421)AT3G29180| Symbols: | similar to unknown protein [Arabidopsis thaliana] (TAIR:AT5G39430.1); similar to unnamed protein product [Vitis vinifera] (GB:CAO15029.1); contains InterPro domain Protein of unknown function DUF1336 (InterPro:IPR009769) | chr3:11150310-11152559 FORWARD no original description	-1.51561	0.380301
11766522	glyma01g06540	moderately similar to ( 362)AT2G25355| Symbols: | exonuclease-related | chr2:10808646-10810670 FORWARD no original description	-1.55198	0.0155944
11766542	glyma01g06590	weakly similar to ( 114)AT3G14470| Symbols: | disease resistance protein (NBS-LRR class), putative | chr3:4857947-4861111 FORWARD no original description	-1.15809	0.768835
11766551	glyma01g06630	moderately similar to ( 338)AT1G69380| Symbols: | similar to unknown protein [Arabidopsis thaliana] (TAIR:AT5G13610.1); similar to unnamed protein product [Vitis vinifera] (GB:CAO15325.1); contains InterPro domain Protein of unknown function DUF155 (InterPro:IPR003734) | chr1:26085392-26087094 REVERSE no original description	-1.13789	0.394884
11766562	glyma01g06680	moderately similar to ( 238)AT1G69360| Symbols: | similar to unknown protein [Arabidopsis thaliana] (TAIR:AT1G26620.1); similar to hypothetical protein [Vitis vinifera] (GB:CAN65039.1); contains InterPro domain Protein of unknown function DUF863, plant (InterPro:IPR008581) | chr1:26076183-26079083 REVERSE no original description	1.37057	0.0704155
11766575	glyma01g06780	no original description	1.17059	0.446844
11766586	glyma01g06800	moderately similar to ( 279)AT1G69330| Symbols: | zinc finger (C3HC4-type RING finger) family protein | chr1:26067801-26068613 REVERSE no original description	1.08708	0.501905
11766591	glyma01g06830	moderately similar to ( 296)AT2G20540| Symbols: | pentatricopeptide (PPR) repeat-containing protein | chr2:8851241-8852845 FORWARD no original description	-1.24467	0.667166
11766595	glyma01g06870	weakly similar to ( 184)AT1G69310| Symbols: ATWRKY57, WRKY57 | WRKY57 (WRKY DNA-binding protein 57); transcription factor | chr1:26059781-26061572 REVERSE no original description	1.13476	0.550766
11766628	glyma01g07010	moderately similar to ( 489)AT1G26520| Symbols: | similar to PRLI-interacting factor L, putative [Arabidopsis thaliana] (TAIR:AT1G15730.1); similar to unnamed protein product [Vitis vinifera] (GB:CAO41893.1); contains InterPro domain Cobalamin (vitamin B12) biosynthesis CobW-like, C-terminal (InterPro:IPR011629); contains InterPro domain Cobalamin (vitamin B12) biosynthesis CobW-like (InterPro:IP…	1.80467	0.0473864
11766640	glyma01g07020	highly similar to ( 873)AT2G03480| Symbols: | dehydration-responsive protein-related | chr2:1051506-1054087 FORWARD no original description	1.59521	0.0490319
11766655	glyma01g07070	moderately similar to ( 383)AT1G26480| Symbols: GF14 IOTA, GRF12 | GRF12 (GENERAL REGULATORY FACTOR 12); protein phosphorylated amino acid binding | chr1:9156560-9157832 REVERSEmoderately similar to ( 360)1433D_SOYBN no original description	1.22874	0.0824952
11766664	glyma01g07100	weakly similar to ( 122)AT1G18650| Symbols: | glycosyl hydrolase family protein 17 | chr1:6419028-6420405 REVERSE no original description	-1.15201	0.606931
11766676	glyma01g07180	moderately similar to ( 488)AT5G50280| Symbols: EMB1006 | EMB1006 (EMBRYO DEFECTIVE 1006) | chr5:20476464-20478730 FORWARDweakly similar to ( 143)RF1_ORYSA no original description	-1.43824	0.465857
11766708	glyma01g07300	moderately similar to ( 413)AT1G12700| Symbols: | helicase domain-containing protein / pentatricopeptide (PPR) repeat-containing protein | chr1:4322911-4326195 REVERSEmoderately similar to ( 274)RF1_ORYSA no original description	-1.11766	0.77503
11766729	glyma01g07360	no original description	-1.03967	0.955697
11766734	glyma01g07390	weakly similar to ( 138)AT1G13740| Symbols: | similar to unknown protein [Arabidopsis thaliana] (TAIR:AT1G69260.1); similar to unnamed protein product [Vitis vinifera] (GB:CAO41856.1); contains InterPro domain Protein of unknown function DUF1675 (InterPro:IPR012463) | chr1:4713966-4715155 FORWARD no original description	11.0415	0.00861152
11766757	glyma01g07530	highly similar to ( 986)AT1G26370| Symbols: | RNA helicase, putative | chr1:9122017-9125355 REVERSE no original description	1.13783	0.0303051
11766772	glyma01g07550	no original description	1.03658	0.840794
11766781	glyma01g07580	highly similar to ( 585)AT1G13710| Symbols: CYP78A5 | CYP78A5 (cytochrome P450, family 78, subfamily A, polypeptide 5); oxygen binding | chr1:4702929-4704589 REVERSEmoderately similar to ( 446)C78A3_SOYBN no original description	-2.21161	0.0782648
11766794	glyma01g07640	moderately similar to ( 268)AT1G69220| Symbols: SIK1 | SIK1 (ERINE/THREONINE KINASE 1); kinase | chr1:26023961-26029782 REVERSE no original description	1.2352	0.181838
11766800	glyma01g07670	moderately similar to ( 368)AT1G69220| Symbols: SIK1 | SIK1 (ERINE/THREONINE KINASE 1); kinase | chr1:26023961-26029782 REVERSE no original description	1.182	0.441628
11766811	glyma01g07680	weakly similar to ( 199)AT1G75310| Symbols: AUL1 | AUL1 (auxin-like 1 protein); heat shock protein binding | chr1:28264665-28269785 FORWARD no original description	1.18712	0.197972
11766839	glyma01g07770	moderately similar to ( 344)AT1G13700| Symbols: | glucosamine/galactosamine-6-phosphate isomerase family protein | chr1:4694472-4695597 REVERSE no original description	-1.46448	0.0677134
11766846	glyma01g07790	highly similar to ( 654)AT4G30000| Symbols: | dihydropterin pyrophosphokinase, putative / dihydropteroate synthase, putative / DHPS, putative | chr4:14670530-14672403 REVERSE no original description	-1.31372	0.184919
11766853	glyma01g07860	highly similar to ( 719)AT1G31710| Symbols: | copper amine oxidase, putative | chr1:11349836-11355320 FORWARDhighly similar to ( 917)AMO_PEA no original description	-2.52242	0.25042
11766873	glyma01g07910	nearly identical (1050)AT3G24240| Symbols: | leucine-rich repeat transmembrane protein kinase, putative | chr3:8780558-8784157 FORWARDmoderately similar to ( 426)RPK1_IPONI no original description	-1.06045	0.837612
11766881	glyma01g07930	highly similar to ( 661)AT3G02230| Symbols: ATRGP1, ATRGP, RGP1 | RGP1 (REVERSIBLY GLYCOSYLATED POLYPEPTIDE 1) | chr3:415470-417311 FORWARDhighly similar to ( 691)UPTG_PEA no original description	1.56175	0.0296867
11766888	glyma01g07970	highly similar to ( 590)AT3G47950| Symbols: AHA4 | AHA4 (Arabidopsis H(+)-ATPase 4); ATPase | chr3:17704000-17708786 FORWARDhighly similar to ( 602)PMA1_NICPL no original description	-1.15152	0.75576
11766911	glyma01g08030	weakly similar to ( 167)AT1G69180| Symbols: CRC | CRC (CRABS CLAW); transcription factor | chr1:26011397-26012603 REVERSEweakly similar to ( 170)YABDL_ORYSA no original description	1.29036	0.465509
11766932	glyma01g08130	moderately similar to ( 242)AT5G15800| Symbols: AGL2, SEP1 | SEP1 (SEPALLATA1) | chr5:5151597-5153770 REVERSEmoderately similar to ( 249)CMB1_DIACA no original description	1.02784	0.949128
11766945	glyma01g08150	moderately similar to ( 256)AT1G69120| Symbols: AGL7, AP1 | AP1 (APETALA1); DNA binding / transcription factor | chr1:25986239-25989765 REVERSEmoderately similar to ( 258)AP1_SINAL no original description	-1.259	0.42374
11766963	glyma01g08200	moderately similar to ( 345)AT5G41060| Symbols: | zinc finger (DHHC type) family protein | chr5:16453177-16454768 FORWARD no original description	-1.2516	0.350817
11766992	glyma01g08540	very weakly similar to (97.1)AT2G03810| Symbols: | 18S pre-ribosomal assembly protein gar2-related | chr2:1162700-1164283 FORWARD no original description	1.40167	0.10891
11767000	glyma01g08560	no original description	-1.02826	0.952998
11767007	glyma01g08580	moderately similar to ( 216)AT1G26300| Symbols: | BSD domain-containing protein | chr1:9098924-9099733 REVERSE no original description	1.18612	0.393707
11767016	glyma01g08610	moderately similar to ( 375)AT1G69020| Symbols: | prolyl oligopeptidase family protein | chr1:25947612-25950860 REVERSE no original description	-1.42013	0.112594
11767031	glyma01g08640	moderately similar to ( 393)AT3G14470| Symbols: | disease resistance protein (NBS-LRR class), putative | chr3:4857947-4861111 FORWARD no original description	1.53909	0.252361
11767045	glyma01g08980	highly similar to ( 613)AT5G15740| Symbols: | similar to unknown protein [Arabidopsis thaliana] (TAIR:AT3G02250.1); similar to hypothetical protein [Cleome spinosa] (GB:ABD96934.1); similar to unnamed protein product [Vitis vinifera] (GB:CAO49221.1); similar to hypothetical protein [Cleome spinosa] (GB:ABD96844.1); contains InterPro domain Protein of unknown function DUF246, plant (InterPro:IPR00…	-1.16413	0.684265
11767073	glyma01g09080	moderately similar to ( 219)AT2G46080| Symbols: | similar to BPS1 (BYPASS 1) [Arabidopsis thaliana] (TAIR:AT1G01550.2); similar to BPS1 (BYPASS 1) [Arabidopsis thaliana] (TAIR:AT1G01550.1); similar to unknown [Populus trichocarpa] (GB:ABK94247.1) | chr2:18955390-18956433 REVERSE no original description	1.24355	0.459071
11767081	glyma01g09120	highly similar to ( 830)AT2G03890| Symbols: | phosphatidylinositol 3- and 4-kinase family protein | chr2:1186196-1188148 FORWARD no original description	1.08828	0.27537
11767098	glyma01g09160	moderately similar to ( 417)AT5G03490| Symbols: | UDP-glucoronosyl/UDP-glucosyl transferase family protein | chr5:871549-872946 FORWARDweakly similar to ( 163)ZOX_PHAVU no original description	-1.30809	0.0978732
11767109	glyma01g09230	no original description	1.10213	0.851309
11767116	glyma01g09280	moderately similar to ( 258)AT5G10280| Symbols: AtMYB92, AtMYB64, MYB92 | MYB92 (myb domain protein 92); DNA binding / transcription factor | chr5:3232777-3233957 FORWARDmoderately similar to ( 202)ODO1_PETHY no original description	-1.17912	0.722711
11767121	glyma01g09310	nearly identical (1124)AT2G04030| Symbols: EMB1956, CR88 | CR88 (EMBRYO DEFECTIVE 1956); ATP binding | chr2:1281980-1285906 FORWARDhighly similar to ( 519)ENPL_HORVU no original description	-2.46455	0.105071
11767153	glyma01g09360	moderately similar to ( 375)AT1G17020| Symbols: ATSRG1, SRG1 | SRG1 (SENESCENCE-RELATED GENE 1); oxidoreductase, acting on paired donors, with incorporation or reduction of molecular oxygen, 2-oxoglutarate as one donor, and incorporation of one atom each of oxygen into both donors | chr1:5820251-5821734 FORWARDweakly similar to ( 172)LDOX_PETHY no original description	1.3198	0.316125
11767171	glyma01g09420	moderately similar to ( 315)AT1G68910| Symbols: | similar to unknown protein [Arabidopsis thaliana] (TAIR:AT5G11390.1); similar to unnamed protein product [Vitis vinifera] (GB:CAO15349.1) | chr1:25912036-25914148 REVERSE no original description	1.12872	0.660395
11767186	glyma01g09430	weakly similar to ( 122)ATMG00860| Symbols: ORF158 | hypothetical protein | chrM:235916-236392 FORWARDweakly similar to ( 152)RRPO_OENBE no original description	-1.02131	0.974884
11767208	glyma01g09460	no original description	3.35983	0.0758199
11767215	glyma01g09480	no original description	-1.1061	0.612707
11767221	glyma01g09510	weakly similar to ( 128)AT3G30530| Symbols: ATBZIP42 | ATBZIP42 (ARABIDOPSIS THALIANA BASIC LEUCINE-ZIPPER); DNA binding / protein heterodimerization/ protein homodimerization/ transcription factor | chr3:12141991-12142512 FORWARD no original description	-2.21604	0.0565457
11767224	glyma01g09520	highly similar to ( 747)AT1G26230| Symbols: | chaperonin, putative | chr1:9072375-9075259 REVERSEhighly similar to ( 674)RUBB_PEA no original description	-1.28352	0.593853
11767239	glyma01g09530	no original description	1.03347	0.889187
11767241	glyma01g09550	no original description	1.03046	0.969422
11767263	glyma01g09640	weakly similar to ( 117)AT3G25545| Symbols: | similar to unknown [Populus trichocarpa] (GB:ABK95265.1) | chr3:9278874-9279677 FORWARD no original description	1.29599	0.255809
11767267	glyma01g09650	moderately similar to ( 489)AT1G68850| Symbols: | peroxidase, putative | chr1:25887469-25888840 REVERSEmoderately similar to ( 263)PER2_ORYSA no original description	-1.41401	0.160403
11767273	glyma01g09660	highly similar to ( 963)AT1G26190| Symbols: | phosphoribulokinase/uridine kinase family protein | chr1:9057272-9060420 REVERSE no original description	1.33337	0.270469
11767290	glyma01g09900	moderately similar to ( 287)AT2G20830| Symbols: | folic acid binding / transferase | chr2:8975451-8976879 REVERSE no original description	1.471	0.551524
11767296	glyma01g10040	moderately similar to ( 470)AT3G05390| Symbols: | similar to unknown protein [Arabidopsis thaliana] (TAIR:AT4G01240.1); similar to unnamed protein product [Vitis vinifera] (GB:CAO17562.1); similar to hypothetical protein [Vitis vinifera] (GB:CAN77378.1); contains domain SSF53335 (SSF53335); contains domain PROKAR_LIPOPROTEIN (PS51257) | chr3:1546591-1547982 REVERSE no original description	1.09776	0.649571
11767317	glyma01g10070	no original description	1.20797	0.361471
11767319	glyma01g10080	moderately similar to ( 478)AT3G25570| Symbols: | adenosylmethionine decarboxylase family protein | chr3:9288650-9289699 REVERSEhighly similar to ( 600)DCAM_VICFA no original description	1.06636	0.828885
11767321	glyma01g10100	highly similar to ( 907)AT5G16000| Symbols: NIK1 | NIK1 (NSP-INTERACTING KINASE 1); kinase | chr5:5224267-5227006 FORWARDmoderately similar to ( 230)NORK_PEA no original description	-1.37181	0.45623
11767384	glyma01g10350	weakly similar to ( 157)AT1G16080| Symbols: | similar to unknown [Populus trichocarpa] (GB:ABK94042.1) | chr1:5514388-5515755 FORWARD no original description	1.15377	0.765586
11767414	glyma01g10840	weakly similar to ( 110)ATMG00860| Symbols: ORF158 | hypothetical protein | chrM:235916-236392 FORWARDweakly similar to ( 123)RRPO_OENBE no original description	-1.11708	0.772373
11767419	glyma01g10850	moderately similar to ( 321)AT2G35170| Symbols: | MORN (Membrane Occupation and Recognition Nexus) repeat-containing protein /phosphatidylinositol-4-phosphate 5-kinase-related | chr2:14834694-14836684 FORWARDvery weakly similar to (81.6)PI5K1_ORYSA no original description	1.33232	0.0391965
11767427	glyma01g10880	moderately similar to ( 482)AT1G02170| Symbols: ATMCPB1, MCP1B, AMC1, ATMC1, LOL3 | LOL3 (LSD ONE LIKE 3); caspase/ cysteine-type endopeptidase | chr1:411883-413426 FORWARD no original description	-1.17185	0.343474
11767436	glyma01g10900	moderately similar to ( 394)KTI1_SOYBN no original description	-1.05941	0.91703
11767440	glyma01g11120	no original description	-1.01925	0.966856
11767448	glyma01g11130	moderately similar to ( 344)AT5G46700| Symbols: TET1, TRN2 | TET1/TRN2 (TETRASPANIN2) | chr5:18968262-18969666 FORWARD no original description	1.22745	0.447009
11767451	glyma01g11150	no original description	1.0879	0.69364
11767463	glyma01g11170	weakly similar to ( 167)AT2G25010| Symbols: | similar to unknown protein [Arabidopsis thaliana] (TAIR:AT1G17930.1); similar to unnamed protein product [Vitis vinifera] (GB:CAO41085.1); contains InterPro domain Protein of unknown function DUF1723 (InterPro:IPR013541) | chr2:10638770-10640626 FORWARD no original description	1.74037	0.375348
11767471	glyma01g11180	no original description	1.09553	0.180813
11767480	glyma01g11640	weakly similar to ( 188)ITRA_SOYBN no original description	-3.38052	0.0176637
11767487	glyma01g11900	no original description	-1.02627	0.921035
11767502	glyma01g12740	highly similar to ( 525)AT1G32640| Symbols: RD22BP1, JAI1, JIN1, MYC2, ZBF1, ATMYC2 | ATMYC2 (JASMONATE INSENSITIVE 1); DNA binding / transcription factor | chr1:11799022-11800893 REVERSEvery weakly similar to (87.4)ARRS_MAIZE no original description	-3.33384	0.0127409
11767506	glyma01g12940	no original description	4.8355	0.0191563
11767514	glyma01g13410	weakly similar to ( 149)AT2G44940| Symbols: | AP2 domain-containing transcription factor TINY, putative | chr2:18544369-18545256 FORWARD no original description	-1.06434	0.838011
11767531	glyma01g13900	highly similar to ( 606)AT1G02050| Symbols: | chalcone and stilbene synthase family protein | chr1:359164-360441 REVERSEmoderately similar to ( 305)CHS9_DAUCA no original description	1.37058	0.443059
11767534	glyma01g13910	weakly similar to ( 103)AT4G23160| Symbols: | protein kinase family protein | chr4:12129496-12134097 FORWARDvery weakly similar to (86.7)POLX_TOBAC no original description	-1.08352	0.585793
11767547	glyma01g13950	highly similar to ( 737)AT2G44980| Symbols: | transcription regulatory protein SNF2, putative | chr2:18559418-18563744 REVERSEmoderately similar to ( 216)ISW2_ORYSA no original description	1.47334	0.0243528
11767566	glyma01g14170	moderately similar to ( 495)AT2G44990| Symbols: MAX3, CCD7 | CCD7 (more axillary growth 3) | chr2:18566013-18568408 FORWARD no original description	1.57901	0.55273
11767579	glyma01g14420	no original description	-1.42628	0.0104716
11767581	glyma01g14440	moderately similar to ( 327)AT2G45000| Symbols: EMB2766 | EMB2766 (EMBRYO DEFECTIVE 2766); structural constituent of nuclear pore | chr2:18571231-18574707 FORWARD no original description	-1.48124	0.0161695
11767590	glyma01g14500	weakly similar to ( 142)AT4G35670| Symbols: | glycoside hydrolase family 28 protein / polygalacturonase (pectinase) family protein | chr4:16915001-16917206 FORWARDvery weakly similar to (96.3)PGLR3_MAIZE no original description	1.1254	0.821778
11767595	glyma01g14700	weakly similar to ( 170)AT2G45030| Symbols: | mitochondrial elongation factor, putative | chr2:18579486-18583831 FORWARDweakly similar to ( 138)EFGM_ORYSA no original description	-1.24381	0.196134
11767597	glyma01g14740	weakly similar to ( 157)AT1G45332| Symbols: | mitochondrial elongation factor, putative | chr1:17174947-17179123 REVERSEweakly similar to ( 152)EFGM_ORYSA no original description	-1.15849	0.227719
11767600	glyma01g14800	highly similar to ( 781)AT2G45030| Symbols: | mitochondrial elongation factor, putative | chr2:18579486-18583831 FORWARDhighly similar to ( 773)EFGM_ORYSA no original description	1.02586	0.929224
11767624	glyma01g15010	weakly similar to ( 119)AT5G22580| Symbols: | Identical to Uncharacterized protein At5g22580 [Arabidopsis Thaliana] (GB:Q9FK81); similar to stable protein 1-related [Arabidopsis thaliana] (TAIR:AT3G17210.1); similar to hypothetical protein [Vitis vinifera] (GB:CAN68720.1); contains InterPro domain Dimeric alpha-beta barrel (InterPro:IPR011008); contains InterPro domain Stress responsive alpha-bet…	-1.34624	0.589489
11767627	glyma01g15020	weakly similar to ( 133)AT1G27370| Symbols: | squamosa promoter-binding protein-like 10 (SPL10) | chr1:9505441-9506984 REVERSEweakly similar to ( 129)SBP1_ANTMA no original description	-1.86692	0.0528016
11767636	glyma01g15430	no original description	1.09487	0.775721
11767640	glyma01g15630	very weakly similar to (92.4)AT3G60520| Symbols: | zinc ion binding | chr3:22372726-22373442 REVERSE no original description	-1.03352	0.956062
11767645	glyma01g15860	no original description	1.09736	0.81682
11767670	glyma01g15930	moderately similar to ( 278)AT4G00050| Symbols: UNE10 | UNE10 (unfertilized embryo sac 10); DNA binding / transcription factor | chr4:17863-19848 FORWARD no original description	-3.86583	0.0148173
11767682	glyma01g16140	moderately similar to ( 311)AT1G65680| Symbols: EXPB2, ATHEXP BETA 1.4, ATEXPB2 | ATEXPB2 (ARABIDOPSIS THALIANA EXPANSIN B2) | chr1:24430929-24432062 FORWARDmoderately similar to ( 284)EXB14_ORYSA no original description	-1.01313	0.950365
11767700	glyma01g16370	moderately similar to ( 464)AT3G28030| Symbols: UVR1, UVH3 | UVH3 (ULTRAVIOLET HYPERSENSITIVE 3); nuclease | chr3:10425558-10432415 FORWARD no original description	-1.34769	0.0994272
11767721	glyma01g16380	highly similar to ( 602)AT5G03900| Symbols: | Identical to Uncharacterized protein At5g03900 precursor [Arabidopsis Thaliana] (GB:Q8GW20;GB:Q8L632;GB:Q8LG15;GB:Q9FFM9;GB:Q9LZB9); similar to unnamed protein product [Vitis vinifera] (GB:CAO15906.1); contains InterPro domain HesB/YadR/YfhF-like (InterPro:IPR000361) | chr5:1048337-1051868 FORWARD no original description	-1.13543	0.569468
11767737	glyma01g16620	no original description	1.23206	0.494672
11767757	glyma01g16820	highly similar to ( 842)AT5G40200| Symbols: DEGP9 | DEGP9 (DEGP PROTEASE 9); serine-type peptidase/ trypsin | chr5:16087630-16090329 FORWARD no original description	-1.11815	0.496882
11767769	glyma01g16830	no original description	1.15509	0.75576
11767774	glyma01g17030	moderately similar to ( 357)AT3G28050| Symbols: | nodulin MtN21 family protein | chr3:10444221-10446453 FORWARD no original description	-1.22144	0.390009
11767797	glyma01g17330	moderately similar to ( 431)AT4G31500| Symbols: SUR2, RNT1, RED1, ATR4, CYP83B1 | CYP83B1 (CYTOCHROME P450 MONOOXYGENASE 83B1); oxygen binding | chr4:15273683-15275277 REVERSEmoderately similar to ( 395)C71A9_SOYBN no original description	1.15397	0.648219
11767803	glyma01g17580	moderately similar to ( 229)AT3G60670| Symbols: | zinc-binding protein, putative | chr3:22435670-22437049 REVERSE no original description	-1.39163	0.0847706
11767823	glyma01g17820	weakly similar to ( 122)AT4G00165| Symbols: | protease inhibitor/seed storage/lipid transfer protein (LTP) family protein | chr4:69433-69819 REVERSEvery weakly similar to (84.0)14KD_DAUCA no original description	-2.35449	0.0257461
11767825	glyma01g17880	no original description	-1.04525	0.919698
11767832	glyma01g18520	highly similar to ( 511)AT2G43890| Symbols: | polygalacturonase, putative / pectinase, putative | chr2:18184001-18185467 FORWARDmoderately similar to ( 424)PGLR_PRUPE no original description	-1.06389	0.904172
11767846	glyma01g18750	weakly similar to ( 145)AT3G60580| Symbols: | zinc finger (C2H2 type) family protein | chr3:22404982-22405848 FORWARD no original description	1.63771	0.188749
11767853	glyma01g19190	no original description	1.10289	0.659042
11767862	glyma01g19200	moderately similar to ( 251)AT1G68260| Symbols: | thioesterase family protein | chr1:25589639-25591264 REVERSE no original description	-1.10647	0.697207
11767871	glyma01g19410	no original description	1.22715	0.392807
11767885	glyma01g19420	weakly similar to ( 101)AT1G68440| Symbols: | similar to unknown protein [Arabidopsis thaliana] (TAIR:AT1G25400.1); similar to unnamed protein product [Vitis vinifera] (GB:CAO42150.1) | chr1:25661778-25662698 FORWARD no original description	1.05243	0.767263
11767889	glyma01g19820	moderately similar to ( 492)AT1G77420| Symbols: | hydrolase, alpha/beta fold family protein | chr1:29098535-29100336 FORWARD no original description	-1.33657	0.31328
11767906	glyma01g20030	moderately similar to ( 300)AT1G68540| Symbols: | oxidoreductase family protein | chr1:25723729-25724945 FORWARDweakly similar to ( 127)DFRA_VITVI no original description	-1.19042	0.257652
11767916	glyma01g20450	weakly similar to ( 116)AT1G68550| Symbols: | AP2 domain-containing transcription factor, putative | chr1:25729473-25730447 REVERSE no original description	-3.02356	0.0353595
11767923	glyma01g20670	moderately similar to ( 413)AT5G38470| Symbols: | DNA repair protein RAD23, putative | chr5:15421950-15424481 FORWARDmoderately similar to ( 358)RAD23_ORYSA no original description	1.3177	0.0558716
11767938	glyma01g20700	highly similar to ( 889)AT1G68570| Symbols: | proton-dependent oligopeptide transport (POT) family protein | chr1:25750474-25753773 FORWARD no original description	-1.65453	0.240621
11767945	glyma01g20710	highly similar to ( 847)AT1G68570| Symbols: | proton-dependent oligopeptide transport (POT) family protein | chr1:25750474-25753773 FORWARD no original description	-1.15219	0.448797
11767950	glyma01g20720	moderately similar to ( 456)AT3G25860| Symbols: PLE2, LTA2 | LTA2 (PLASTID E2 SUBUNIT OF PYRUVATE DECARBOXYLASE); dihydrolipoyllysine-residue acetyltransferase | chr3:9461869-9463822 FORWARD no original description	1.3758	0.119361
11767956	glyma01g20760	highly similar to ( 675)AT3G06350| Symbols: EMB3004, MEE32 | EMB3004/MEE32 (EMBRYO DEFECTIVE 3004); 3-dehydroquinate dehydratase/ NADP binding / binding / catalytic/ shikimate 5-dehydrogenase | chr3:1924542-1927707 REVERSE no original description	-1.13341	0.287515
11767970	glyma01g20780	moderately similar to ( 268)AT1G68580| Symbols: | agenet domain-containing protein / bromo-adjacent homology (BAH) domain-containing protein | chr1:25756532-25759294 FORWARD no original description	-1.19615	0.0682435
11767976	glyma01g20790	no original description	-1.74237	0.101018
11767984	glyma01g20800	very weakly similar to (92.0)AT3G25855| Symbols: | metal ion binding | chr3:9460845-9461504 REVERSE no original description	-1.06195	0.84021
11767988	glyma01g20810	highly similar to ( 659)AT3G25840| Symbols: | protein kinase family protein | chr3:9454230-9457559 REVERSEweakly similar to ( 111)MMK1_MEDSA no original description	1.3623	0.0473623
11768011	glyma01g20860	moderately similar to ( 231)AT1G13340| Symbols: | similar to unknown protein [Arabidopsis thaliana] (TAIR:AT1G34220.2); similar to unknown [Carica papaya] (GB:ABS01355.1); contains InterPro domain Protein of unknown function DUF292, eukaryotic (InterPro:IPR005061) | chr1:4569619-4571040 REVERSE no original description	1.50782	0.0899618
11768030	glyma01g20950	highly similar to ( 526)AT1G25480| Symbols: | similar to unknown protein [Arabidopsis thaliana] (TAIR:AT2G17470.1); similar to unknown protein [Arabidopsis thaliana] (TAIR:AT1G68600.1); similar to unnamed protein product [Vitis vinifera] (GB:CAO42118.1); contains InterPro domain Protein of unknown function UPF0005 (InterPro:IPR006214) | chr1:8948454-8950863 FORWARD no original description	1.31724	0.493897
11768039	glyma01g20980	weakly similar to ( 130)AT1G58320| Symbols: | similar to unknown protein [Arabidopsis thaliana] (TAIR:AT5G35525.1); similar to unnamed protein product [Vitis vinifera] (GB:CAO42113.1); contains InterPro domain Protein of unknown function Cys-rich (InterPro:IPR006461) | chr1:21637788-21638968 REVERSE no original description	1.25607	0.255099
11768045	glyma01g20990	weakly similar to ( 114)AT1G68170| Symbols: | nodulin MtN21 family protein | chr1:25555588-25557921 FORWARD no original description	-1.06564	0.894053
11768055	glyma01g21540	no original description	-1.03411	0.846639
11768061	glyma01g21570	moderately similar to ( 270)AT3G02100| Symbols: | UDP-glucoronosyl/UDP-glucosyl transferase family protein | chr3:368847-370491 REVERSEweakly similar to ( 127)IAAG_MAIZE no original description	-1.02995	0.954621
11768066	glyma01g21580	moderately similar to ( 345)AT3G02100| Symbols: | UDP-glucoronosyl/UDP-glucosyl transferase family protein | chr3:368847-370491 REVERSEweakly similar to ( 136)UFOG_SOLME no original description	2.98122	0.09886
11768069	glyma01g21590	moderately similar to ( 379)AT3G02100| Symbols: | UDP-glucoronosyl/UDP-glucosyl transferase family protein | chr3:368847-370491 REVERSEweakly similar to ( 151)IAAG_MAIZE no original description	-1.03872	0.896244
11768079	glyma01g21620	moderately similar to ( 351)AT3G02100| Symbols: | UDP-glucoronosyl/UDP-glucosyl transferase family protein | chr3:368847-370491 REVERSEweakly similar to ( 157)IAAG_MAIZE no original description	-1.07953	0.633457
11768158	glyma01g22120	moderately similar to ( 305)AT1G13290| Symbols: | zinc finger (C2H2 type) family protein | chr1:4550363-4551524 REVERSE no original description	1.05522	0.782275
11768168	glyma01g22480	moderately similar to ( 497)AT1G13250| Symbols: GATL3 | GATL3 (Galacturonosyltransferase-like 3); polygalacturonate 4-alpha-galacturonosyltransferase/ transferase, transferring glycosyl groups / transferase, transferring hexosyl groups | chr1:4528962-4529999 REVERSE no original description	-2.23516	0.0248892
11768171	glyma01g22490	highly similar to ( 752)AT1G68830| Symbols: STN7 | STN7 (STT7 HOMOLOG STN7); kinase/ protein kinase | chr1:25876317-25879136 REVERSEmoderately similar to ( 314)STT7_CHLRE no original description	-1.30031	0.435588
11768186	glyma01g22500	no original description	-1.07298	0.888099
11768194	glyma01g22600	moderately similar to ( 387)AT1G25682| Symbols: | cell cycle control protein-related | chr1:9002519-9004537 REVERSE no original description	1.23695	0.279147
11768204	glyma01g22610	moderately similar to ( 371)AT1G26090| Symbols: | ATP binding | chr1:9020496-9022606 FORWARD no original description	1.02194	0.95892
11768216	glyma01g22670	moderately similar to ( 218)AT3G21360| Symbols: | oxidoreductase | chr3:7522871-7524042 FORWARD no original description	1.32267	0.455775
11768222	glyma01g22710	moderately similar to ( 402)AT1G67230| Symbols: LINC1 | LINC1 (LITTLE NUCLEI1) | chr1:25155224-25159695 REVERSE no original description	1.17979	0.549943
11768240	glyma01g22730	moderately similar to ( 436)AT3G25670| Symbols: | leucine-rich repeat family protein | chr3:9345769-9347538 REVERSEweakly similar to ( 104)RPK1_IPONI no original description	-1.25796	0.59495
11768265	glyma01g22840	nearly identical (1320)AT1G68750| Symbols: ATPPC4 | ATPPC4 (Arabidopsis thaliana phosphoenolpyruvate carboxylase 4); phosphoenolpyruvate carboxylase | chr1:25826605-25831767 REVERSEhighly similar to ( 511)CAPP2_CHLRE no original description	1.13631	0.702678
11768287	glyma01g22850	highly similar to ( 699)AT1G31770| Symbols: | ABC transporter family protein | chr1:11375233-11377625 REVERSEweakly similar to ( 195)PDR3_ORYSA no original description	-1.12153	0.472292
11768296	glyma01g22910	no original description	-1.0996	0.695483
11768316	glyma01g22990	nearly identical (1002)AT1G68740| Symbols: | EXS family protein / ERD1/XPR1/SYG1 family protein | chr1:25816398-25820237 REVERSE no original description	-2.03504	0.0323727
11768332	glyma01g23010	very weakly similar to (85.9)AT1G68730| Symbols: | zinc finger (DNL type) family protein | chr1:25813984-25814791 REVERSE no original description	-1.08935	0.506236
11768363	glyma01g23140	nearly identical (1786)AT1G68710| Symbols: | haloacid dehalogenase-like hydrolase family protein | chr1:25797161-25801638 REVERSE no original description	2.33755	0.0412722
11768376	glyma01g23150	moderately similar to ( 452)AT5G54890| Symbols: | Identical to CRS2-associated factor 2, mitochondrial precursor [Arabidopsis Thaliana] (GB:Q9FFU1); similar to unknown protein [Arabidopsis thaliana] (TAIR:AT4G31010.1); similar to unnamed protein product [Vitis vinifera] (GB:CAO38974.1); contains InterPro domain CRS1/YhbY (InterPro:IPR001890) | chr5:22310572-22312135 FORWARD no original description	1.15132	0.730375
11768412	glyma01g23340	no original description	-2.47644	0.179253
11768421	glyma01g23480	no original description	-1.18134	0.521132
11768430	glyma01g23490	weakly similar to ( 182)AT5G28780| Symbols: | similar to unknown protein [Arabidopsis thaliana] (TAIR:AT3G51690.1); similar to expressed protein [Oryza sativa (japonica cultivar-group)] (GB:ABB47755.2); similar to putative helicase [Oryza sativa (japonica cultivar-group)] (GB:AAK54292.1); contains InterPro domain Protein of unknown function DUF889, eukaryote (InterPro:IPR010285) | chr5:10812911-1…	-1.08659	0.871309
11768434	glyma01g23500	highly similar to ( 789)AT3G60240| Symbols: CUM2, EIF4G | EIF4G (EUKARYOTIC TRANSLATION INITIATION FACTOR 4G) | chr3:22272817-22279270 FORWARDweakly similar to ( 174)IF41_WHEAT no original description	-1.01853	0.807553
11768450	glyma01g23830	moderately similar to ( 449)AT4G37880| Symbols: | protein binding / zinc ion binding | chr4:17810177-17811343 FORWARD no original description	1.9715	0.0432274
11768458	glyma01g23850	no original description	-1.02933	0.952007
11768490	glyma01g24420	weakly similar to ( 123)AT3G51840| Symbols: ATSCX, ATG6, ACX4 | ACX4 (ACYL-COA OXIDASE 4); oxidoreductase | chr3:19236630-19239985 REVERSE no original description	1.04077	0.902662
11768500	glyma01g24430	moderately similar to ( 377)AT3G09320| Symbols: | zinc finger (DHHC type) family protein | chr3:2862148-2864119 REVERSE no original description	1.00746	0.977908
11768521	glyma01g24520	moderately similar to ( 358)AT3G53900| Symbols: | uracil phosphoribosyltransferase, putative / UMP pyrophosphorylase, putative / UPRTase, putative | chr3:19967892-19969984 REVERSEmoderately similar to ( 379)UPP_TOBAC no original description	1.2378	0.278223
11768538	glyma01g24530	highly similar to ( 941)AT2G39800| Symbols: ATP5CS, P5CS1 | P5CS1 (DELTA1-PYRROLINE-5-CARBOXYLATE SYNTHASE 1) | chr2:16605594-16610017 REVERSEhighly similar to ( 957)P5CS_ACTCH no original description	3.5791	0.0486157
11768561	glyma01g24540	moderately similar to ( 330)AT3G55550| Symbols: | lectin protein kinase, putative | chr3:20610998-20613052 REVERSEweakly similar to ( 147)PSKR_DAUCA no original description	1.1843	0.61676
11768571	glyma01g24580	weakly similar to ( 133)AT3G48880| Symbols: | F-box family protein | chr3:18138858-18139993 FORWARD no original description	1.05611	0.895471
11768592	glyma01g24650	highly similar to ( 545)AT5G41970| Symbols: | similar to unknown protein [Arabidopsis thaliana] (TAIR:AT3G49320.1); similar to unnamed protein product [Vitis vinifera] (GB:CAO62930.1); contains InterPro domain Metal-dependent protein hydrolase (InterPro:IPR003226) | chr5:16808426-16810189 FORWARD no original description	-1.01884	0.970076
11768604	glyma01g24710	weakly similar to ( 150)AT5G51670| Symbols: | similar to unknown protein [Arabidopsis thaliana] (TAIR:AT3G23160.1); similar to unnamed protein product [Vitis vinifera] (GB:CAO49748.1); contains InterPro domain Protein of unknown function DUF668 (InterPro:IPR007700) | chr5:21010786-21012322 FORWARD no original description	1.88761	0.0170567
11768621	glyma01g24750	moderately similar to ( 239)AT4G34540| Symbols: | isoflavone reductase family protein | chr4:16500511-16501937 FORWARDweakly similar to ( 180)IFRH_SOLTU no original description	1.03604	0.951314
11768634	glyma01g24790	no original description	2.44952	0.0185182
11768640	glyma01g24820	very weakly similar to (95.9)AT5G06070| Symbols: RAB, RBE | RBE (RABBIT EARS); nucleic acid binding / transcription factor/ zinc ion binding | chr5:1828427-1829107 REVERSE no original description	1.03455	0.904567
11768644	glyma01g24850	moderately similar to ( 468)AT2G37730| Symbols: | fringe-related protein | chr2:15829264-15831616 REVERSE no original description	1.10792	0.806998
11768649	glyma01g24870	weakly similar to ( 136)AT5G45460| Symbols: | similar to unknown protein [Arabidopsis thaliana] (TAIR:AT5G45470.1); similar to unnamed protein product [Vitis vinifera] (GB:CAO39193.1) | chr5:18434381-18436492 REVERSE no original description	-1.00749	0.984358
11768652	glyma01g24880	no original description	-4.75325	0.0176051
11768656	glyma01g24910	no original description	1.06957	0.880808
11768666	glyma01g24920	moderately similar to ( 319)AT2G37770| Symbols: | aldo/keto reductase family protein | chr2:15841966-15843737 FORWARDweakly similar to ( 188)ALDR_HORVU no original description	-1.011	0.967544
11768672	glyma01g24950	moderately similar to ( 447)AT2G37770| Symbols: | aldo/keto reductase family protein | chr2:15841966-15843737 FORWARDmoderately similar to ( 233)ALDR_HORVU no original description	1.57875	0.078505
11768685	glyma01g24960	weakly similar to ( 121)AT2G37760| Symbols: | aldo/keto reductase family protein | chr2:15839073-15840756 FORWARD no original description	1.03375	0.948398
11768693	glyma01g25000	highly similar to ( 526)AT2G37770| Symbols: | aldo/keto reductase family protein | chr2:15841966-15843737 FORWARDmoderately similar to ( 267)ALDR_HORVU no original description	1.06897	0.880808
11768707	glyma01g25050	weakly similar to ( 185)AT2G47470| Symbols: ATPDIL2-1, UNE5, MEE30 | ATPDIL2-1/MEE30/UNE5 (PDI-LIKE 2-1) | chr2:19488573-19490753 FORWARDweakly similar to ( 200)PDIA6_MEDSA no original description	1.21054	0.65699
11768739	glyma01g25830	highly similar to ( 768)AT3G53950| Symbols: | glyoxal oxidase-related | chr3:19986682-19988319 FORWARD no original description	-1.28637	0.653933
11768742	glyma01g25840	weakly similar to ( 122)AT5G23740| Symbols: RPS11-BETA | RPS11-BETA (RIBOSOMAL PROTEIN S11-BETA); structural constituent of ribosome | chr5:8008254-8009333 REVERSEweakly similar to ( 137)RS11_SOYBN no original description	1.72904	0.685345
11768746	glyma01g25910	no original description	1.29535	0.119956
11768750	glyma01g25930	no original description	1.71771	0.29787
11768755	glyma01g25940	moderately similar to ( 425)AT1G16470| Symbols: PAB1 | PAB1 (PROTEASOME SUBUNIT PAB1); peptidase | chr1:5623116-5625433 FORWARDmoderately similar to ( 417)PSA2_ORYSA no original description	-1.0069	0.951605
11768774	glyma01g25960	no original description	-1.10257	0.861872
11768787	glyma01g26220	moderately similar to ( 241)AT3G09270| Symbols: ATGSTU8 | ATGSTU8 (Arabidopsis thaliana Glutathione S-transferase (class tau) 8); glutathione transferase | chr3:2848413-2849232 REVERSEmoderately similar to ( 268)GSTX6_SOYBN no original description	1.44117	0.0730864
11768792	glyma01g26230	moderately similar to ( 234)AT3G09270| Symbols: ATGSTU8 | ATGSTU8 (Arabidopsis thaliana Glutathione S-transferase (class tau) 8); glutathione transferase | chr3:2848413-2849232 REVERSEmoderately similar to ( 284)GSTX6_SOYBN no original description	1.2669	0.278276
11768816	glyma01g26340	no original description	1.15153	0.216986
11768823	glyma01g26350	highly similar to ( 862)AT3G54010| Symbols: DEI1, PAS1 | PAS1 (PASTICCINO 1); FK506 binding / peptidyl-prolyl cis-trans isomerase | chr3:20012566-20016041 FORWARDweakly similar to ( 182)FKB70_WHEAT no original description	-1.03451	0.906502
11768846	glyma01g26590	weakly similar to ( 179)AT5G01030| Symbols: | similar to unknown protein [Arabidopsis thaliana] (TAIR:AT2G37930.1); similar to unnamed protein product [Vitis vinifera] (GB:CAO15744.1) | chr5:10637-13002 FORWARD no original description	-2.23817	0.104325
11768849	glyma01g26610	weakly similar to ( 139)RRPO_OENBE no original description	1.18027	0.264859
11768882	glyma01g26650	moderately similar to ( 303)AT3G09230| Symbols: ATMYB1 | ATMYB1 (MYB DOMAIN PROTEIN 1); DNA binding / transcription factor | chr3:2833466-2835140 FORWARDweakly similar to ( 111)GAM1_ORYSA no original description	-1.31452	0.154393
11768887	glyma01g26670	weakly similar to ( 179)AT5G05830| Symbols: | zinc finger (C3HC4-type RING finger) family protein | chr5:1755911-1756826 FORWARD no original description	-1.09879	0.798488
11768890	glyma01g26710	no original description	-1.00017	0.999654
11768902	glyma01g26860	weakly similar to ( 146)AT2G37960| Symbols: | similar to unknown protein [Arabidopsis thaliana] (TAIR:AT3G54060.1); similar to unknown protein [Arabidopsis thaliana] (TAIR:AT3G54060.2); similar to unnamed protein product [Vitis vinifera] (GB:CAO15756.1) | chr2:15894040-15896258 REVERSE no original description	-1.08934	0.50918
11768915	glyma01g26900	weakly similar to ( 145)AT2G37960| Symbols: | similar to unknown protein [Arabidopsis thaliana] (TAIR:AT3G54060.1); similar to unknown protein [Arabidopsis thaliana] (TAIR:AT3G54060.2); similar to unnamed protein product [Vitis vinifera] (GB:CAO15756.1) | chr2:15894040-15896258 REVERSE no original description	-1.04642	0.946784
11768927	glyma01g26930	moderately similar to ( 309)AT3G09210| Symbols: PTAC13 | PTAC13 (PLASTID TRANSCRIPTIONALLY ACTIVE13); transcription elongation regulator | chr3:2825428-2826856 REVERSE no original description	-1.26221	0.238916
11768934	glyma01g26940	weakly similar to ( 186)AT5G01090| Symbols: | legume lectin family protein | chr5:33054-34115 FORWARD no original description	-2.02923	0.119326
11768938	glyma01g26970	moderately similar to ( 258)AT2G37970| Symbols: SOUL-1 | SOUL-1; binding | chr2:15898105-15898782 FORWARD no original description	1.89418	0.0573364
11768942	glyma01g26990	highly similar to ( 622)AT3G54090| Symbols: | pfkB-type carbohydrate kinase family protein | chr3:20039123-20040813 FORWARDweakly similar to ( 173)SCRK_SOLTU no original description	-2.1916	0.0989021
11768951	glyma01g27110	moderately similar to ( 388)AT3G11320| Symbols: | organic anion transmembrane transporter | chr3:3547023-3548545 REVERSE no original description	-1.14202	0.725294
11768956	glyma01g27120	moderately similar to ( 424)AT3G54110| Symbols: UCP, PUMP1, ATUCP1, UCP1, ATPUMP1 | ATPUMP1; binding / oxidative phosphorylation uncoupler | chr3:20049868-20051974 FORWARD no original description	2.20222	0.239559
11768993	glyma01g27240	highly similar to ( 905)AT3G09100| Symbols: | mRNA capping enzyme family protein | chr3:2788440-2792918 REVERSE no original description	-1.05827	0.80989
11769018	glyma01g27250	nearly identical (1116)AT3G09090| Symbols: DEX1 | DEX1 (DEFECTIVE IN EXINE FORMATION 1) | chr3:2783170-2787557 REVERSE no original description	-1.13225	0.405617
11769035	glyma01g27260	highly similar to ( 559)AT3G05610| Symbols: | pectinesterase family protein | chr3:1625882-1627982 REVERSEmoderately similar to ( 415)PME_MEDSA no original description	1.12429	0.80774
11769043	glyma01g27310	weakly similar to ( 159)AT2G29880| Symbols: | Identical to Uncharacterized protein At2g29880 [Arabidopsis Thaliana] (GB:O82368;GB:Q1PEY9); similar to unknown protein [Arabidopsis thaliana] (TAIR:AT5G27260.1); similar to hypothetical protein [Vitis vinifera] (GB:CAN74698.1) | chr2:12749613-12750622 FORWARD no original description	1.06561	0.864465
11769058	glyma01g27360	weakly similar to ( 176)AT2G38070| Symbols: | similar to glycine-rich protein [Arabidopsis thaliana] (TAIR:AT3G09070.1); similar to unnamed protein product [Vitis vinifera] (GB:CAO15781.1); contains InterPro domain Protein of unknown function DUF740 (InterPro:IPR008004) | chr2:15935815-15937674 FORWARD no original description	1.29635	0.313204
11769067	glyma01g27440	moderately similar to ( 451)AT5G36930| Symbols: | disease resistance protein (TIR-NBS-LRR class), putative | chr5:14585001-14589146 REVERSE no original description	1.2386	0.222013
11769075	glyma01g27460	highly similar to ( 602)AT5G36930| Symbols: | disease resistance protein (TIR-NBS-LRR class), putative | chr5:14585001-14589146 REVERSE no original description	1.73444	0.0679952
11769081	glyma01g27490	highly similar to ( 835)AT3G54140| Symbols: | proton-dependent oligopeptide transport (POT) family protein | chr3:20056863-20059132 REVERSE no original description	-1.202	0.540802
11769088	glyma01g27500	no original description	1.03815	0.930834
11769095	glyma01g27710	highly similar to ( 820)AT2G38080| Symbols: IRX12, LAC4 | IRX12/LAC4 (laccase 4); copper ion binding / oxidoreductase | chr2:15941618-15944430 FORWARDmoderately similar to ( 209)ASO_TOBAC no original description	-3.56981	0.0222859
11769104	glyma01g27720	moderately similar to ( 325)AT2G38090| Symbols: | myb family transcription factor | chr2:15952356-15953853 FORWARD no original description	-1.2497	0.523217
11769130	glyma01g27810	highly similar to ( 622)AT5G01210| Symbols: | transferase family protein | chr5:84553-85980 FORWARDweakly similar to ( 103)HCBT1_DIACA no original description	1.34904	0.388704
11769142	glyma01g27890	no original description	-1.21953	0.446322
11769168	glyma01g28020	no original description	1.16762	0.742368
11769174	glyma01g28030	no original description	-1.12803	0.637147
11769180	glyma01g28040	no original description	-1.07605	0.793498
11769186	glyma01g28050	no original description	-1.28583	0.590811
11769224	glyma01g28440	weakly similar to ( 135)AT4G31980| Symbols: | similar to unknown protein [Arabidopsis thaliana] (TAIR:AT5G11290.1); similar to unnamed protein product [Vitis vinifera] (GB:CAO46056.1); similar to hypothetical protein [Vitis vinifera] (GB:CAN68458.1); contains InterPro domain Protein of unknown function DUF862, eukaryotic (InterPro:IPR008580); contains InterPro domain Protein of unknown function D…	2.27128	0.0495879
11769230	glyma01g28500	very weakly similar to (83.6)AT2G38140| Symbols: PSRP4 | PSRP4 (PLASTID-SPECIFIC RIBOSOMAL PROTEIN 4); structural constituent of ribosome | chr2:15988026-15988537 FORWARD no original description	-2.14197	0.0596268
11769236	glyma01g28520	weakly similar to ( 139)AT5G01260| Symbols: | glycoside hydrolase starch-binding domain-containing protein | chr5:105366-106487 FORWARD no original description	-1.84676	0.209167
11769256	glyma01g28550	weakly similar to ( 190)AT2G40060| Symbols: | protein binding / protein transporter/ structural molecule | chr2:16733642-16735079 FORWARD no original description	1.10292	0.795566
11769273	glyma01g28800	very weakly similar to (98.2)AT4G31980| Symbols: | similar to unknown protein [Arabidopsis thaliana] (TAIR:AT5G11290.1); similar to unnamed protein product [Vitis vinifera] (GB:CAO46056.1); similar to hypothetical protein [Vitis vinifera] (GB:CAN68458.1); contains InterPro domain Protein of unknown function DUF862, eukaryotic (InterPro:IPR008580); contains InterPro domain Protein of unknown funct…	1.19276	0.72471
11769275	glyma01g28820	no original description	-1.14567	0.23237
11769290	glyma01g28850	highly similar to ( 560)AT1G32780| Symbols: | alcohol dehydrogenase, putative | chr1:11869957-11872575 REVERSEmoderately similar to ( 402)ADH1_PETHY no original description	-1.29814	0.142256
11769306	glyma01g28880	moderately similar to ( 488)AT1G32780| Symbols: | alcohol dehydrogenase, putative | chr1:11869957-11872575 REVERSEmoderately similar to ( 350)ADH1_PETHY no original description	1.08061	0.84897
11769357	glyma01g29150	highly similar to ( 786)AT5G01310| Symbols: | basic helix-loop-helix (bHLH) family protein | chr5:125303-128959 FORWARD no original description	-1.45452	0.0487937
11769406	glyma01g29330	moderately similar to ( 379)AT1G53430| Symbols: | leucine-rich repeat family protein / protein kinase family protein | chr1:19939741-19944627 FORWARDweakly similar to ( 179)NORK_MEDTR no original description	-1.19495	0.254593
11769428	glyma01g29350	moderately similar to ( 217)AT1G53420| Symbols: | serine/threonine protein kinase-related | chr1:19930294-19935162 REVERSEvery weakly similar to (90.1)RPK1_IPONI no original description	1.37377	0.0146884
11769438	glyma01g29360	highly similar to ( 601)AT1G07650| Symbols: | leucine-rich repeat transmembrane protein kinase, putative | chr1:2359814-2366420 REVERSEmoderately similar to ( 208)NORK_MEDTR no original description	1.34698	0.131644
11769459	glyma01g29380	highly similar to ( 562)AT1G07650| Symbols: | leucine-rich repeat transmembrane protein kinase, putative | chr1:2359814-2366420 REVERSEweakly similar to ( 194)NORK_MEDTR no original description	-1.21575	0.35325
11769482	glyma01g29470	nearly identical (1293)AT2G38280| Symbols: ATAMPD, FAC1 | FAC1 (EMBRYONIC FACTOR1); AMP deaminase | chr2:16040845-16045871 REVERSEnearly identical (1169)AMPD_ORYSA no original description	-2.42097	0.0347754
11769510	glyma01g29540	moderately similar to ( 351)AT2G38270| Symbols: CXIP2 | CXIP2 (CAX-INTERACTING PROTEIN 2); electron carrier/ protein disulfide oxidoreductase | chr2:16038425-16040132 REVERSE no original description	1.28094	0.122883
11769514	glyma01g29570	moderately similar to ( 343)AT1G45616| Symbols: | leucine-rich repeat family protein | chr1:17185990-17188974 REVERSEweakly similar to ( 176)RPK1_IPONI no original description	8.75098	0.0339207
11769516	glyma01g29580	moderately similar to ( 365)AT1G45616| Symbols: | leucine-rich repeat family protein | chr1:17185990-17188974 REVERSEweakly similar to ( 181)RPK1_IPONI no original description	3.02008	0.0306704
11769524	glyma01g29600	weakly similar to ( 192)AT3G60750| Symbols: | transketolase, putative | chr3:22464979-22467799 FORWARDweakly similar to ( 200)TKTC_MAIZE no original description	-1.0003	0.999337
11769536	glyma01g29620	moderately similar to ( 371)AT1G45616| Symbols: | leucine-rich repeat family protein | chr1:17185990-17188974 REVERSEweakly similar to ( 191)RPK1_IPONI no original description	4.10904	0.037283
11769541	glyma01g29630	highly similar to ( 640)AT5G05580| Symbols: SH1, FAD8 | FAD8 (FATTY ACID DESATURASE 8); omega-3 fatty acid desaturase | chr5:1664332-1666346 FORWARDhighly similar to ( 664)FAD3C_SOYBN no original description	-1.75135	0.0552995
11769566	glyma01g29670	no original description	2.88944	0.0293564
11769611	glyma01g29930	moderately similar to ( 310)AT5G05600| Symbols: | oxidoreductase, 2OG-Fe(II) oxygenase family protein | chr5:1672267-1674603 FORWARDweakly similar to ( 159)FL3H_VITVI no original description	-1.09856	0.939886
11769620	glyma01g30000	moderately similar to ( 238)AT5G61820| Symbols: | similar to MtN19-like protein [Pisum sativum] (GB:AAU14999.2); contains InterPro domain Stress up-regulated Nod 19 (InterPro:IPR011692) | chr5:24851731-24853449 REVERSE no original description	1.03482	0.895953
11769626	glyma01g30010	moderately similar to ( 227)AT5G61820| Symbols: | similar to MtN19-like protein [Pisum sativum] (GB:AAU14999.2); contains InterPro domain Stress up-regulated Nod 19 (InterPro:IPR011692) | chr5:24851731-24853449 REVERSE no original description	-1.11593	0.83422
11769661	glyma01g30350	moderately similar to ( 236)AT3G08920| Symbols: | rhodanese-like domain-containing protein | chr3:2712280-2713123 FORWARD no original description	-4.39687	0.0117698
11769669	glyma01g30390	moderately similar to ( 335)AT3G11210| Symbols: | GDSL-motif lipase/hydrolase family protein | chr3:3511107-3512905 REVERSE no original description	-1.91934	0.0403935
11769721	glyma01g30660	weakly similar to ( 112)AT5G01310| Symbols: | basic helix-loop-helix (bHLH) family protein | chr5:125303-128959 FORWARDvery weakly similar to ( 100)LAX_ORYSA no original description	1.39271	0.114402
11769724	glyma01g30670	moderately similar to ( 203)AT5G01300| Symbols: | phosphatidylethanolamine-binding family protein | chr5:121642-122127 REVERSE no original description	1.18021	0.74801
11769729	glyma01g30870	no original description	-1.00425	0.99159
11769742	glyma01g30910	moderately similar to ( 207)AT3G51780| Symbols: ATBAG4 | ATBAG4 (ARABIDOPSIS THALIANA BCL-2-ASSOCIATED ATHANOGENE 4); protein binding | chr3:19218006-19219155 REVERSE no original description	1.00251	0.979169
11769758	glyma01g31170	nearly identical (1357)AT3G51770| Symbols: ETO1 | ETO1 (ETHYLENE OVERPRODUCER 1) | chr3:19211307-19214974 REVERSE no original description	-1.58118	0.0342807
11769765	glyma01g31180	very weakly similar to (81.6)AT3G51760| Symbols: | unknown protein | chr3:19209520-19210384 REVERSE no original description	-1.12426	0.59209
11769770	glyma01g31260	highly similar to ( 509)AT5G01590| Symbols: | similar to unnamed protein product [Vitis vinifera] (GB:CAO63840.1) | chr5:224248-226194 FORWARD no original description	-1.08395	0.785703
11769775	glyma01g31270	moderately similar to ( 452)AT5G58420| Symbols: | 40S ribosomal protein S4 (RPS4D) | chr5:23636825-23638122 FORWARDmoderately similar to ( 458)RS4_SOLTU no original description	-3.04977	0.0281889
11769788	glyma01g31320	moderately similar to ( 225)AT2G38310| Symbols: | similar to unknown protein [Arabidopsis thaliana] (TAIR:AT5G05440.1); similar to unnamed protein product [Vitis vinifera] (GB:CAO48777.1); contains InterPro domain Bet v I allergen; (InterPro:IPR000916); contains InterPro domain Streptomyces cyclase/dehydrase (InterPro:IPR005031) | chr2:16057329-16057952 FORWARD no original description	-20.876	0.0119487
11769792	glyma01g31350	moderately similar to ( 366)AT2G38320| Symbols: | similar to unknown protein [Arabidopsis thaliana] (TAIR:AT5G01620.2); similar to unknown protein [Arabidopsis thaliana] (TAIR:AT5G01620.1); similar to unnamed protein product [Vitis vinifera] (GB:CAO48779.1); contains InterPro domain Protein of unknown function DUF231, plant (InterPro:IPR004253) | chr2:16062566-16064952 FORWARD no original descrip…	-1.18771	0.693986
11769801	glyma01g31370	highly similar to ( 607)AT5G01620| Symbols: | similar to unknown protein [Arabidopsis thaliana] (TAIR:AT2G38320.1); similar to unnamed protein product [Vitis vinifera] (GB:CAO48780.1); contains InterPro domain Protein of unknown function DUF231, plant (InterPro:IPR004253) | chr5:232879-234818 FORWARD no original description	1.01335	0.980253
11769820	glyma01g31470	weakly similar to ( 131)AT3G18880| Symbols: | ribosomal protein S17 family protein | chr3:6509594-6510075 FORWARD no original description	-1.28069	0.334176
11769826	glyma01g31480	highly similar to ( 897)AT1G67510| Symbols: | leucine-rich repeat family protein | chr1:25301140-25303847 REVERSEweakly similar to ( 160)PSKR_DAUCA no original description	-1.26205	0.23485
11769830	glyma01g31530	no original description	-1.02585	0.957231
11769838	glyma01g31620	weakly similar to ( 154)AT2G29880| Symbols: | Identical to Uncharacterized protein At2g29880 [Arabidopsis Thaliana] (GB:O82368;GB:Q1PEY9); similar to unknown protein [Arabidopsis thaliana] (TAIR:AT5G27260.1); similar to hypothetical protein [Vitis vinifera] (GB:CAN74698.1) | chr2:12749613-12750622 FORWARD no original description	-1.32226	0.346636
11769842	glyma01g31660	weakly similar to ( 183)AT1G58170| Symbols: | disease resistance-responsive protein-related / dirigent protein-related | chr1:21539853-21540410 FORWARD no original description	1.18321	0.640117
11769846	glyma01g31670	weakly similar to ( 191)AT1G58170| Symbols: | disease resistance-responsive protein-related / dirigent protein-related | chr1:21539853-21540410 FORWARD no original description	-1.07329	0.817411
11769852	glyma01g31700	moderately similar to ( 420)AT1G47890| Symbols: | disease resistance family protein | chr1:17647645-17650704 FORWARDmoderately similar to ( 221)RPK1_IPONI no original description	1.07568	0.780994
11769865	glyma01g31730	very weakly similar to (97.4)AT5G49040| Symbols: | disease resistance-responsive protein-related / dirigent protein-related | chr5:19899902-19900477 REVERSE no original description	-1.10099	0.751817
11769870	glyma01g31740	no original description	1.11258	0.851775
11769873	glyma01g31750	weakly similar to ( 157)AT5G49040| Symbols: | disease resistance-responsive protein-related / dirigent protein-related | chr5:19899902-19900477 REVERSE no original description	1.75626	0.0770774
11769884	glyma01g31830	weakly similar to ( 196)AT1G58170| Symbols: | disease resistance-responsive protein-related / dirigent protein-related | chr1:21539853-21540410 FORWARD no original description	1.19023	0.585153
11769888	glyma01g31840	highly similar to ( 603)AT3G51670| Symbols: | SEC14 cytosolic factor family protein / phosphoglyceride transfer family protein | chr3:19179891-19181827 FORWARD no original description	-1.04725	0.948141
11769906	glyma01g31910	weakly similar to ( 140)AT2G38480| Symbols: | integral membrane protein, putative | chr2:16118038-16118772 REVERSE no original description	-1.05524	0.926333
11769916	glyma01g32010	weakly similar to ( 154)AT1G55170| Symbols: | similar to unknown protein [Arabidopsis thaliana] (TAIR:AT3G14750.1); similar to hypothetical protein [Vitis vinifera] (GB:CAN71449.1); contains InterPro domain Prefoldin (InterPro:IPR009053) | chr1:20584245-20585373 FORWARD no original description	1.45113	0.269385
11769924	glyma01g32040	moderately similar to ( 275)AT5G01750| Symbols: | Identical to Uncharacterized protein At5g01750 [Arabidopsis Thaliana] (GB:Q9LZX1;GB:Q8LEK9); similar to unknown protein [Arabidopsis thaliana] (TAIR:AT3G11740.1); similar to unnamed protein product [Vitis vinifera] (GB:CAO48825.1); contains InterPro domain Protein of unknown function DUF567 (InterPro:IPR007612) | chr5:290031-291106 FORWARD no orig…	-1.05906	0.915834
11769942	glyma01g32070	moderately similar to ( 275)AT5G01750| Symbols: | Identical to Uncharacterized protein At5g01750 [Arabidopsis Thaliana] (GB:Q9LZX1;GB:Q8LEK9); similar to unknown protein [Arabidopsis thaliana] (TAIR:AT3G11740.1); similar to unnamed protein product [Vitis vinifera] (GB:CAO48825.1); contains InterPro domain Protein of unknown function DUF567 (InterPro:IPR007612) | chr5:290031-291106 FORWARD no orig…	-1.11484	0.716632
11769950	glyma01g32130	weakly similar to ( 124)AT2G40435| Symbols: | transcription regulator | chr2:16894126-16895485 FORWARD no original description	1.20175	0.638841
11769965	glyma01g32220	moderately similar to ( 220)AT5G05340| Symbols: | peroxidase, putative | chr5:1579143-1580820 REVERSEmoderately similar to ( 276)PER1_ARAHY no original description	1.18073	0.549096
11769976	glyma01g32270	moderately similar to ( 355)AT5G05340| Symbols: | peroxidase, putative | chr5:1579143-1580820 REVERSEmoderately similar to ( 361)PER1_ARAHY no original description	1.5926	0.079413
11769982	glyma01g32310	moderately similar to ( 340)AT5G05340| Symbols: | peroxidase, putative | chr5:1579143-1580820 REVERSEmoderately similar to ( 364)PER1_ARAHY no original description	-1.10737	0.753071
11769988	glyma01g32340	weakly similar to ( 150)AT3G27650| Symbols: LBD25 | LBD25 (LOB DOMAIN-CONTAINING PROTEIN 25) | chr3:10239968-10241583 FORWARD no original description	-1.16889	0.720885
11769992	glyma01g32360	highly similar to ( 536)AT2G30970| Symbols: ASP1 | ASP1 (ASPARTATE AMINOTRANSFERASE 1) | chr2:13186089-13188763 FORWARDmoderately similar to ( 346)AATC_DAUCA no original description	1.25977	0.559058
11770005	glyma01g32380	moderately similar to ( 236)AT2G38370| Symbols: | similar to unknown protein [Arabidopsis thaliana] (TAIR:AT3G51720.1); similar to unnamed protein product [Vitis vinifera] (GB:CAO48842.1); contains InterPro domain Protein of unknown function DUF827, plant (InterPro:IPR008545) | chr2:16079262-16081246 REVERSE no original description	-1.1532	0.652849
11770010	glyma01g32390	weakly similar to ( 172)AT3G51730| Symbols: | saposin B domain-containing protein | chr3:19197949-19199415 FORWARD no original description	1.15103	0.708073
11770022	glyma01g32400	highly similar to ( 621)AT5G58380| Symbols: SIP1, SNRK3.8, PKS2, CIPK10 | CIPK10 (CBL-INTERACTING PROTEIN KINASE 10); kinase | chr5:23614318-23615757 REVERSEmoderately similar to ( 459)CIPK1_ORYSA no original description	1.56759	0.0547247
11770027	glyma01g32430	highly similar to ( 565)AT5G01830| Symbols: | armadillo/beta-catenin repeat family protein / U-box domain-containing protein | chr5:320980-323004 FORWARDweakly similar to ( 163)SPL11_ORYSA no original description	1.63806	0.300447
11770030	glyma01g32440	very weakly similar to (99.0)AT2G30400| Symbols: ATOFP2, OFP2 | ATOFP2/OFP2 (ARABIDOPSIS THALIANA OVATE FAMILY PROTEIN 2) | chr2:12963669-12964631 FORWARD no original description	-1.44784	0.293657
11770034	glyma01g32470	no original description	1.53635	0.570795
11770037	glyma01g32480	highly similar to ( 513)AT2G38510| Symbols: | MATE efflux protein-related | chr2:16131063-16132523 FORWARD no original description	1.33434	0.555053
11770039	glyma01g32680	highly similar to ( 506)AT5G01850| Symbols: | protein kinase, putative | chr5:332826-334177 FORWARDvery weakly similar to (97.4)NORK_MEDTR no original description	-1.39087	0.296963
11770047	glyma01g32690	highly similar to ( 694)AT1G29690| Symbols: CAD1 | CAD1 (CONSTITUTIVELY ACTIVATED CELL DEATH 1) | chr1:10379296-10381847 REVERSE no original description	2.03972	0.00796133
11770066	glyma01g32750	very weakly similar to (91.7)AT5G59310| Symbols: LTP4 | LTP4 (LIPID TRANSFER PROTEIN 4); lipid binding | chr5:23942522-23942998 REVERSEweakly similar to ( 111)NLTP_CICAR no original description	1.17324	0.0669952
11770070	glyma01g32760	very weakly similar to (91.7)AT2G38540| Symbols: LTP1, ATLTP1, LP1 | LP1 (nonspecific lipid transfer protein 1) | chr2:16137496-16137971 FORWARDvery weakly similar to (96.3)NLTP2_GOSHI no original description	-1.27538	0.528566
11770073	glyma01g32800	moderately similar to ( 347)AT3G08760| Symbols: ATSIK | ATSIK; kinase | chr3:2658135-2659990 REVERSEvery weakly similar to (94.0)NORK_MEDTR no original description	1.36887	0.36414
11770089	glyma01g32890	no original description	-1.90466	0.115117
11770095	glyma01g32900	no original description	1.25665	0.594019
11770104	glyma01g32920	moderately similar to ( 296)AT2G45080| Symbols: CYCP3;1 | CYCP3;1 (cyclin p3;1); cyclin-dependent protein kinase | chr2:18598763-18599518 FORWARD no original description	-1.04664	0.939543
11770109	glyma01g32960	weakly similar to ( 115)AT4G35280| Symbols: | zinc finger (C2H2 type) family protein | chr4:16787434-16788288 REVERSE no original description	1.09918	0.756607
11770115	glyma01g32990	weakly similar to ( 106)AT2G45120| Symbols: | zinc finger (C2H2 type) family protein | chr2:18610755-18611699 FORWARD no original description	1.51601	0.0914255
11770147	glyma01g33170	moderately similar to ( 235)AT2G45130| Symbols: | SPX (SYG1/Pho81/XPR1) domain-containing protein | chr2:18613564-18614829 FORWARD no original description	1.08108	0.521692
11770153	glyma01g33180	weakly similar to ( 162)AT1G71140| Symbols: | MATE efflux family protein | chr1:26828424-26830410 FORWARD no original description	1.26343	0.530403
11770166	glyma01g33200	moderately similar to ( 332)AT3G60590| Symbols: | similar to unknown protein [Arabidopsis thaliana] (TAIR:AT1G48460.1); similar to unknown [Populus trichocarpa x Populus deltoides] (GB:ABK96523.1) | chr3:22410018-22410728 FORWARD no original description	1.19604	0.0502832
11770171	glyma01g33220	moderately similar to ( 281)AT3G60600| Symbols: VAP, (AT)VAP, VAP27, VAP27-1 | VAP27-1 (VAMP/SYNAPTOBREVIN-ASSOCIATED PROTEIN 27-1) | chr3:22411512-22412644 FORWARD no original description	1.50465	0.126975
11770181	glyma01g33240	highly similar to ( 767)AT3G28730| Symbols: SSRP1, NFD, ATHMG | ATHMG (HIGH MOBILITY GROUP); transcription factor | chr3:10786191-10789735 FORWARDhighly similar to ( 928)SSRP1_CATRO no original description	-1.1187	0.398193
11770200	glyma01g33290	highly similar to ( 932)AT1G79600| Symbols: | ABC1 family protein | chr1:29954998-29957409 REVERSE no original description	1.74905	0.0456218
11770212	glyma01g33300	no original description	1.08576	0.889655
11770227	glyma01g33340	moderately similar to ( 336)AT3G60660| Symbols: | similar to unknown protein [Arabidopsis thaliana] (TAIR:AT3G55860.1); similar to unnamed protein product [Vitis vinifera] (GB:CAO24503.1); contains InterPro domain Protein of unknown function DUF1395 (InterPro:IPR009829) | chr3:22432456-22434142 FORWARD no original description	1.06761	0.840964
11770239	glyma01g33350	weakly similar to ( 130)AT4G10490| Symbols: | oxidoreductase, 2OG-Fe(II) oxygenase family protein | chr4:6483896-6485175 FORWARDweakly similar to ( 109)ACCO2_MALDO no original description	1.34752	0.139474
11770254	glyma01g33420	weakly similar to ( 139)AT2G45210| Symbols: | auxin-responsive protein-related | chr2:18648958-18649446 FORWARDvery weakly similar to (83.2)AX10A_SOYBN no original description	1.56711	0.164963
11770257	glyma01g33430	moderately similar to ( 236)AT3G60720| Symbols: | receptor-like protein kinase-related | chr3:22453010-22454583 FORWARD no original description	1.21704	0.551927
11770269	glyma01g33500	highly similar to ( 688)AT2G45220| Symbols: | pectinesterase family protein | chr2:18651355-18653468 REVERSEhighly similar to ( 711)PME2_CITSI no original description	1.4493	0.136553
11770272	glyma01g33520	highly similar to ( 676)AT2G45240| Symbols: MAP1A | MAP1A (METHIONINE AMINOPEPTIDASE 1A); methionyl aminopeptidase | chr2:18663133-18665980 FORWARD no original description	1.12624	0.641786
11770298	glyma01g33610	moderately similar to ( 454)AT3G05100| Symbols: | similar to hypothetical protein [Vitis vinifera] (GB:CAN76021.1); contains InterPro domain Methyltransferase type 12 (InterPro:IPR013217) | chr3:1424161-1425673 FORWARD no original description	-1.10015	0.628898
11770304	glyma01g33620	weakly similar to ( 154)AT3G56830| Symbols: | similar to unknown protein [Arabidopsis thaliana] (TAIR:AT1G65420.1); similar to unnamed protein product [Vitis vinifera] (GB:CAO24523.1); contains InterPro domain Protein of unknown function DUF565 (InterPro:IPR007572) | chr3:21053760-21054819 REVERSE no original description	-1.17286	0.373365
11770309	glyma01g33640	moderately similar to ( 360)AT4G08870| Symbols: | arginase, putative | chr4:5647414-5648690 REVERSEmoderately similar to ( 402)ARGI_SOYBN no original description	-1.01757	0.9668
11770320	glyma01g33730	weakly similar to ( 179)AT3G16780| Symbols: | 60S ribosomal protein L19 (RPL19B) | chr3:5708988-5710255 FORWARDvery weakly similar to (80.9)RL19_MAIZE no original description	-1.33732	0.169505
11770356	glyma01g33960	weakly similar to ( 179)AT2G45360| Symbols: | similar to unknown protein [Arabidopsis thaliana] (TAIR:AT3G60780.1); similar to unnamed protein product [Vitis vinifera] (GB:CAO24498.1); contains InterPro domain Protein of unknown function DUF1442 (InterPro:IPR009902) | chr2:18705693-18706434 FORWARD no original description	1.00772	0.964659
11770380	glyma01g34160	no original description	1.63493	0.321664
11770389	glyma01g34210	no original description	-1.13866	0.700886
11770400	glyma01g34300	highly similar to ( 511)RUAP_SOYBN no original description	-8.37635	0.0241643
11770406	glyma01g34320	no original description	1.01312	0.977789
11770410	glyma01g34340	highly similar to ( 694)AT1G02010| Symbols: SEC1A | SEC1A; protein transporter | chr1:348046-352197 FORWARDhighly similar to ( 626)SEC1B_ORYSA no original description	1.07749	0.85083
11770426	glyma01g34350	nearly identical (1031)AT1G33390| Symbols: | helicase domain-containing protein | chr1:12099718-12104088 REVERSE no original description	-1.62283	0.0443692
11770444	glyma01g34380	moderately similar to ( 239)AT3G60810| Symbols: | similar to unnamed protein product [Vitis vinifera] (GB:CAO24482.1); contains InterPro domain Protein of unknown function DUF1499 (InterPro:IPR010865) | chr3:22481554-22482731 FORWARD no original description	-1.52326	0.328373
11770463	glyma01g34490	weakly similar to ( 120)AT5G62020| Symbols: HSFB2A, AT-HSFB2A | AT-HSFB2A (Arabidopsis thaliana heat shock transcription factor B2A); DNA binding / transcription factor | chr5:24933438-24934420 FORWARD no original description	1.46978	0.335188
11770467	glyma01g34520	highly similar to ( 561)AT3G60850| Symbols: | similar to unnamed protein product [Vitis vinifera] (GB:CAO24486.1) | chr3:22493028-22494974 FORWARD no original description	1.0698	0.230347
11770472	glyma01g34540	moderately similar to ( 223)AT2G45420| Symbols: LBD18 | LBD18 (LOB DOMAIN-CONTAINING PROTEIN 18) | chr2:18725675-18727519 FORWARD no original description	1.09985	0.726948
11770476	glyma01g34560	nearly identical (2658)AT3G60860| Symbols: | guanine nucleotide exchange family protein | chr3:22495779-22502485 FORWARD no original description	1.06017	0.887973
11770490	glyma01g34570	weakly similar to ( 105)AT1G24620| Symbols: | polcalcin, putative / calcium-binding pollen allergen, putative | chr1:8723879-8724439 REVERSEvery weakly similar to (85.9)CALM_CHLRE no original description	-1.10777	0.789696
11770494	glyma01g34580	weakly similar to ( 183)AT2G45430| Symbols: | DNA-binding protein-related | chr2:18734922-18735875 FORWARD no original description	1.22118	0.530776
11770500	glyma01g34650	weakly similar to ( 117)AT2G45480| Symbols: AtGRF9 | AtGRF9 (GROWTH-REGULATING FACTOR 9) | chr2:18752657-18754477 FORWARD no original description	1.26594	0.602654
11770503	glyma01g34690	moderately similar to ( 258)AT4G28830| Symbols: | methyltransferase | chr4:14232496-14233702 FORWARD no original description	-1.32485	0.0774545
11770516	glyma01g34740	no original description	1.09746	0.793004
11770521	glyma01g34760	highly similar to ( 518)AT1G67290| Symbols: | glyoxal oxidase-related | chr1:25194831-25196823 REVERSE no original description	1.28688	0.545633
11770526	glyma01g34770	moderately similar to ( 379)AT4G28850| Symbols: | xyloglucan:xyloglucosyl transferase, putative / xyloglucan endotransglycosylase, putative / endo-xyloglucan transferase, putative | chr4:14244342-14245787 FORWARDmoderately similar to ( 274)XTH_SOYBN no original description	-1.15617	0.69994
11770532	glyma01g34780	highly similar to ( 644)AT4G28880| Symbols: CKL3 | CKL3 (Casein Kinase I-like 3); casein kinase I/ kinase | chr4:14251357-14254054 FORWARD no original description	-1.02864	0.866796
11770549	glyma01g34820	moderately similar to ( 244)AT4G28910| Symbols: | similar to nuclear transport factor 2 (NTF2) family protein / RNA recognition motif (RRM)-containing protein [Arabidopsis thaliana] (TAIR:AT3G07250.1); similar to unnamed protein product [Vitis vinifera] (GB:CAO65474.1); contains InterPro domain Protein of unknown function DUF1675 (InterPro:IPR012463) | chr4:14264336-14265686 REVERSE no original d…	1.0186	0.823492
11770556	glyma01g34830	moderately similar to ( 310)AT4G28890| Symbols: | protein binding / ubiquitin-protein ligase/ zinc ion binding | chr4:14256443-14257741 REVERSE no original description	1.25314	0.279367
11770570	glyma01g34890	highly similar to ( 692)AT1G77210| Symbols: | sugar transporter, putative | chr1:29013930-29015874 REVERSEhighly similar to ( 523)STA_RICCO no original description	1.19204	0.685234
11770575	glyma01g34950	weakly similar to ( 114)AT3G55290| Symbols: | short-chain dehydrogenase/reductase (SDR) family protein | chr3:20513630-20514707 FORWARD no original description	1.04375	0.90753
11770579	glyma01g34970	moderately similar to ( 232)AT5G13960| Symbols: KYP, SUVH4 | SUVH4 (SU(VAR)3-9 HOMOLOG 4) | chr5:4501690-4505981 FORWARD no original description	-1.15394	0.672188
11770587	glyma01g34990	highly similar to ( 533)AT5G37000| Symbols: | exostosin family protein | chr5:14635337-14637512 FORWARD no original description	-1.80904	0.101114
11770601	glyma01g35010	weakly similar to ( 155)AT5G11590| Symbols: TINY2 | TINY2 (TINY2); DNA binding / transcription factor | chr5:3727790-3728500 REVERSE no original description	1.0185	0.952909
11770604	glyma01g35030	moderately similar to ( 416)AT5G48790| Symbols: | similar to unknown protein [Arabidopsis thaliana] (TAIR:AT1G73060.1); similar to unnamed protein product [Vitis vinifera] (GB:CAO49997.1) | chr5:19797236-19799203 REVERSE no original description	1.07122	0.886728
11770616	glyma01g35060	highly similar to ( 679)AT1G32415| Symbols: | pentatricopeptide (PPR) repeat-containing protein | chr1:11695591-11697876 FORWARDweakly similar to ( 127)RF1_ORYSA no original description	-1.14258	0.506823
11770621	glyma01g35070	weakly similar to ( 133)AT4G17030| Symbols: EXPR, AT-EXPR, ATEXPR1, ATHEXP BETA 3.1, ATEXLB1 | ATEXLB1 (ARABIDOPSIS THALIANA EXPANSIN-LIKE B1) | chr4:9581836-9583200 REVERSEmoderately similar to ( 230)EXLB1_ORYSA no original description	-1.25397	0.612904
11770638	glyma01g35110	moderately similar to ( 428)AT1G32120| Symbols: | similar to unknown protein [Arabidopsis thaliana] (TAIR:AT4G16050.1); similar to unknown protein [Arabidopsis thaliana] (TAIR:AT1G51538.1); similar to unnamed protein product [Vitis vinifera] (GB:CAO49973.1); similar to hypothetical protein [Vitis vinifera] (GB:CAN68559.1); contains InterPro domain Protein of unknown function DUF716 (InterPro:IPR0…	1.07965	0.808773
11770644	glyma01g35120	weakly similar to ( 151)AT3G07040| Symbols: RPS3, RPM1 | RPM1 (RESISTANCE TO P. SYRINGAE PV MACULICOLA 1); protein binding | chr3:2226250-2229030 REVERSE no original description	1.19404	0.586413
11770659	glyma01g35170	weakly similar to ( 141)AT4G19100| Symbols: | similar to unknown protein [Arabidopsis thaliana] (TAIR:AT5G52780.1); similar to hypothetical protein [Vitis vinifera] (GB:CAN79943.1) | chr4:10453464-10454370 FORWARD no original description	-5.62718	0.0337022
11770664	glyma01g35180	moderately similar to ( 340)AT1G31880| Symbols: NIP3;1, NLM9, BRX | BRX/NIP3;1/NLM9 (BREVIS RADIX); identical protein binding / water channel | chr1:11447784-11450033 FORWARD no original description	1.06259	0.89043
11770673	glyma01g35230	moderately similar to ( 241)AT4G19140| Symbols: | similar to unnamed protein product [Vitis vinifera] (GB:CAO66715.1) | chr4:10469841-10471286 FORWARD no original description	-1.00159	0.991972
11770703	glyma01g35290	highly similar to ( 912)AT2G43040| Symbols: NPG1 | NPG1 (NO POLLEN GERMINATION 1); calmodulin binding | chr2:17903126-17905601 REVERSE no original description	1.43895	0.101694
11770710	glyma01g35310	moderately similar to ( 308)AT1G24480| Symbols: | methyltransferase | chr1:8676428-8677147 REVERSE no original description	1.04406	0.89431
11770712	glyma01g35330	moderately similar to ( 301)AT1G31350| Symbols: | F-box family protein | chr1:11221500-11222687 REVERSE no original description	-2.20862	0.01766
11770722	glyma01g35370	weakly similar to ( 121)AT2G38250| Symbols: | DNA-binding protein-related | chr2:16025462-16026578 FORWARD no original description	1.68582	0.0750377
11770726	glyma01g35390	highly similar to ( 916)AT1G31420| Symbols: | leucine-rich repeat transmembrane protein kinase, putative | chr1:11250341-11253497 FORWARDmoderately similar to ( 324)PSKR_DAUCA no original description	-2.49653	0.0289488
11770741	glyma01g35400	moderately similar to ( 325)AT1G31440| Symbols: | SH3 domain-containing protein 1 (SH3P1) | chr1:11256131-11258460 REVERSE no original description	1.10085	0.47863
11770752	glyma01g35420	no original description	2.96914	0.0891602
11770754	glyma01g35430	highly similar to ( 615)AT1G61590| Symbols: | protein kinase, putative | chr1:22727356-22729687 REVERSEmoderately similar to ( 231)NORK_PEA no original description	1.35289	0.534049
11770762	glyma01g35440	highly similar to ( 610)AT4G19460| Symbols: | glycosyl transferase family 1 protein | chr4:10610433-10611983 REVERSE no original description	1.03288	0.966856
11770764	glyma01g35460	no original description	1.01817	0.955434
11770767	glyma01g35480	highly similar to ( 578)AT4G19420| Symbols: | pectinacetylesterase family protein | chr4:10587515-10589818 REVERSE no original description	1.0224	0.950951
11770787	glyma01g35490	moderately similar to ( 267)AT5G45290| Symbols: | zinc finger (C3HC4-type RING finger) family protein | chr5:18367238-18369319 REVERSE no original description	-3.73301	0.016722
11770795	glyma01g35500	highly similar to ( 852)AT5G45300| Symbols: BMY2, BAM8 | BAM8/BMY2 (BETA-AMYLASE 8); beta-amylase | chr5:18370863-18373923 FORWARDmoderately similar to ( 387)AMYB_MEDSA no original description	-1.54851	0.138833
11770809	glyma01g35530	moderately similar to ( 387)AT5G17540| Symbols: | transferase family protein | chr5:5782063-5783684 REVERSEweakly similar to ( 156)HCBT1_DIACA no original description	1.0467	0.934558
11770813	glyma01g35540	highly similar to ( 601)AT1G31650| Symbols: ATROPGEF14, ROPGEF14 | ATROPGEF14/ROPGEF14 (KINASE PARTNER PROTEIN-LIKE); Rho guanyl-nucleotide exchange factor/ | chr1:11326455-11329748 REVERSE no original description	-1.26839	0.252849
11770824	glyma01g35600	weakly similar to ( 166)AT4G19390| Symbols: | similar to unknown protein [Arabidopsis thaliana] (TAIR:AT5G13720.1); similar to unnamed protein product [Vitis vinifera] (GB:CAO63752.1); contains InterPro domain Uncharacterised conserved protein UCP022348 (InterPro:IPR016804); contains InterPro domain Protein of unknown function UPF0114 (InterPro:IPR005134) | chr4:10574914-10576366 REVERSE no origi…	2.32477	0.0570662
11770837	glyma01g35620	highly similar to ( 810)AT4G19380| Symbols: | alcohol oxidase-related | chr4:10568438-10572299 REVERSE no original description	1.77797	0.0603573
11770843	glyma01g35630	weakly similar to ( 132)AT1G31720| Symbols: | similar to unknown protein [Arabidopsis thaliana] (TAIR:AT4G19370.1); similar to unknown [Picea sitchensis] (GB:ABK21519.1); similar to Os02g0703300 [Oryza sativa (japonica cultivar-group)] (GB:NP_001047854.1); contains InterPro domain Protein of unknown function DUF1218 (InterPro:IPR009606) | chr1:11356150-11356941 FORWARD no original description	-1.00023	0.999654
11770853	glyma01g35650	nearly identical (1167)AT1G31730| Symbols: | epsilon-adaptin, putative | chr1:11359888-11363897 FORWARD no original description	-2.86603	0.0314529
11770868	glyma01g35690	highly similar to ( 939)AT2G35610| Symbols: | similar to unknown protein [Arabidopsis thaliana] (TAIR:AT1G70630.1); similar to unnamed protein product [Vitis vinifera] (GB:CAO63742.1); similar to expressed protein [Oryza sativa (japonica cultivar-group)] (GB:ABF97349.1); similar to hypothetical protein OsI_012032 [Oryza sativa (indica cultivar-group)] (GB:EAY90799.1); contains InterPro domain Ret…	-1.25816	0.474358
11770883	glyma01g35700	highly similar to ( 691)AT4G19220| Symbols: | pentatricopeptide (PPR) repeat-containing protein | chr4:10505277-10508132 REVERSE no original description	-1.26419	0.175067
11770885	glyma01g35720	weakly similar to ( 147)AT2G37960| Symbols: | similar to unknown protein [Arabidopsis thaliana] (TAIR:AT3G54060.1); similar to unknown protein [Arabidopsis thaliana] (TAIR:AT3G54060.2); similar to unnamed protein product [Vitis vinifera] (GB:CAO15756.1) | chr2:15894040-15896258 REVERSE no original description	1.25966	0.760641
11770891	glyma01g35760	no original description	1.07306	0.882905
11770901	glyma01g35780	no original description	-1.08592	0.734928
11770909	glyma01g35820	highly similar to ( 592)AT1G31780| Symbols: | similar to unknown [Populus trichocarpa] (GB:ABK94646.1); similar to unnamed protein product [Vitis vinifera] (GB:CAO63439.1); similar to Hypothetical protein [Oryza sativa (japonica cultivar-group)] (GB:AAN52749.1); contains InterPro domain Conserved oligomeric complex COG6 (InterPro:IPR010490) | chr1:11391322-11394591 FORWARD no original description	-1.16752	0.48563
11770933	glyma01g35850	highly similar to ( 674)AT4G19180| Symbols: | nucleoside phosphatase family protein / GDA1/CD39 family protein | chr4:10485529-10487879 REVERSEvery weakly similar to (83.6)APY_SOLTU no original description	1.22684	0.227719
11770954	glyma01g35950	nearly identical (1623)AT5G65930| Symbols: PKCBP, KCBP, ZWI | ZWI (ZWICHEL); calmodulin binding / microtubule motor | chr5:26387595-26393620 REVERSEmoderately similar to ( 216)FLA10_CHLRE no original description	1.10856	0.884725
11770981	glyma01g35960	moderately similar to ( 377)AT1G14130| Symbols: | 2-oxoglutarate-dependent dioxygenase, putative | chr1:4836038-4837037 REVERSEweakly similar to ( 120)FL3H_MALDO no original description	-1.2119	0.506086
11770987	glyma01g35970	moderately similar to ( 280)AT1G14130| Symbols: | 2-oxoglutarate-dependent dioxygenase, putative | chr1:4836038-4837037 REVERSEvery weakly similar to (94.4)FL3H_DIACA no original description	1.22277	0.527687
11770991	glyma01g35990	very weakly similar to (82.8)AT3G51500| Symbols: | unknown protein | chr3:19119332-19119682 FORWARD no original description	1.38255	0.142172
11770996	glyma01g36010	weakly similar to ( 190)AT3G51520| Symbols: | diacylglycerol acyltransferase family | chr3:19121718-19123497 FORWARD no original description	1.28002	0.26069
11771004	glyma01g36040	moderately similar to ( 329)AT2G17410| Symbols: | ARID/BRIGHT DNA-binding domain-containing protein | chr2:7566951-7570556 FORWARD no original description	-1.07372	0.703829
11771019	glyma01g36050	no original description	-1.26584	0.350347
11771023	glyma01g36070	highly similar to ( 523)AT2G17420| Symbols: ATNTRA, NTR2, NTRA | NTRA (NADPH-dependent thioredoxin reductase 2) | chr2:7571439-7573301 FORWARD no original description	1.43196	0.126972
11771028	glyma01g36090	no original description	-1.07291	0.759501
11771034	glyma01g36110	highly similar to ( 627)AT4G35470| Symbols: | leucine-rich repeat family protein | chr4:16846536-16848453 FORWARDvery weakly similar to (88.6)RPK1_IPONI no original description	-1.49744	0.127114
11771041	glyma01g36130	highly similar to ( 840)AT5G67360| Symbols: ARA12 | ARA12; subtilase | chr5:26889418-26891691 REVERSE no original description	-1.03228	0.927373
11771048	glyma01g36150	moderately similar to ( 305)AT4G35300| Symbols: TMT2 | TMT2 (TONOPLAST MONOSACCHARIDE TRANSPORTER2); carbohydrate transmembrane transporter/ sugar:hydrogen ion symporter | chr4:16796437-16799076 REVERSE no original description	5.50887	0.0232037
11771055	glyma01g36180	weakly similar to ( 103)AT1G42960| Symbols: | expressed protein localized to the inner membrane of the chloroplast. | chr1:16128303-16129520 FORWARD no original description	-1.26708	0.401066
11771064	glyma01g36190	moderately similar to ( 445)AT5G65980| Symbols: | auxin efflux carrier family protein | chr5:26409670-26411458 FORWARD no original description	-1.02084	0.955134
11771078	glyma01g36200	highly similar to ( 639)AT2G17520| Symbols: IRE1A | IRE1A (Yeast endoribonuclease/protein kinase IRE1-like gene); kinase | chr2:7624586-7628011 FORWARD no original description	-1.06395	0.633318
11771085	glyma01g36230	moderately similar to ( 378)AT3G51470| Symbols: | protein phosphatase 2C, putative / PP2C, putative | chr3:19108903-19110223 REVERSE no original description	-1.07912	0.77441
11771089	glyma01g36240	highly similar to ( 676)AT2G17525| Symbols: | pentatricopeptide (PPR) repeat-containing protein | chr2:7631260-7633140 FORWARDmoderately similar to ( 218)RF1_ORYSA no original description	-1.45735	0.0339207
11771092	glyma01g36250	weakly similar to ( 177)AT4G38250| Symbols: | amino acid transporter family protein | chr4:17935527-17936837 FORWARD no original description	-1.1842	0.491642
11771097	glyma01g36260	highly similar to ( 674)AT4G35500| Symbols: | protein kinase family protein | chr4:16857480-16859412 FORWARD no original description	1.18808	0.640825
11771104	glyma01g36280	moderately similar to ( 365)AT4G35520| Symbols: MLH3, ATMLH3 | ATMLH3/MLH3 (MUTL PROTEIN HOMOLOG 3); ATP binding | chr4:16865493-16871532 FORWARD no original description	1.12982	0.461053
11771137	glyma01g36330	weakly similar to ( 144)AT4G16444| Symbols: | similar to unnamed protein product [Vitis vinifera] (GB:CAO14486.1); contains domain PTHR11615 (PTHR11615); contains domain PTHR11615:SF3 (PTHR11615:SF3) | chr4:9274813-9276078 REVERSE no original description	1.25466	0.410659
11771147	glyma01g36340	highly similar to ( 555)AT3G06540| Symbols: | GDP dissociation inhibitor family protein / Rab GTPase activator family protein | chr3:2035207-2037668 REVERSE no original description	1.29847	0.0793894
11771159	glyma01g36360	moderately similar to ( 239)AT4G35590| Symbols: | RWP-RK domain-containing protein | chr4:16892914-16894870 FORWARD no original description	-1.09628	0.852114
11771170	glyma01g36380	weakly similar to ( 154)AT2G28930| Symbols: APK1B | APK1B (Arabidopsis protein kinase 1B); kinase | chr2:12431628-12433642 FORWARD no original description	1.26836	0.502426
11771180	glyma01g36420	moderately similar to ( 436)AT2G17580| Symbols: | polynucleotide adenylyltransferase family protein | chr2:7653589-7657148 FORWARD no original description	-1.44043	0.292662
11771193	glyma01g36430	moderately similar to ( 423)AT1G20610| Symbols: CYCB2;3 | CYCB2;3 (CYCLIN B2;3); cyclin-dependent protein kinase regulator | chr1:7135063-7137263 REVERSEmoderately similar to ( 486)CCNB2_MEDSA no original description	1.11779	0.740343
11771204	glyma01g36440	highly similar to ( 653)AT4G35630| Symbols: PSAT | PSAT (phosphoserine aminotransferase); phosphoserine transaminase | chr4:16904210-16905502 FORWARDhighly similar to ( 587)SERC_SPIOL no original description	1.01672	0.962366
11771208	glyma01g36470	no original description	1.13866	0.702967
11771214	glyma01g36480	moderately similar to ( 317)AT3G12500| Symbols: PR3, PR-3, CHI-B, B-CHI, ATHCHIB | ATHCHIB (BASIC CHITINASE); chitinase | chr3:3962508-3963952 REVERSEmoderately similar to ( 344)CHIX_PEA no original description	7.1496	0.0238279
11771220	glyma01g36490	weakly similar to ( 114)AT4G35680| Symbols: | similar to unknown protein [Arabidopsis thaliana] (TAIR:AT4G01590.1); similar to unknown protein [Arabidopsis thaliana] (TAIR:AT4G01590.2); similar to unnamed protein product [Vitis vinifera] (GB:CAO23714.1); contains InterPro domain Protein of unknown function DUF241, plant (InterPro:IPR004320) | chr4:16917943-16919754 FORWARD no original description	1.0055	0.993641
11771222	glyma01g36500	highly similar to ( 839)AT1G80740| Symbols: DMT4, CMT1 | CMT1 (CHROMOMETHYLASE 1); DNA binding | chr1:30347286-30351723 FORWARDhighly similar to ( 835)CMT1_MAIZE no original description	1.08184	0.756756
11771250	glyma01g36510	weakly similar to ( 133)AT4G35680| Symbols: | similar to unknown protein [Arabidopsis thaliana] (TAIR:AT4G01590.1); similar to unknown protein [Arabidopsis thaliana] (TAIR:AT4G01590.2); similar to unnamed protein product [Vitis vinifera] (GB:CAO23714.1); contains InterPro domain Protein of unknown function DUF241, plant (InterPro:IPR004320) | chr4:16917943-16919754 FORWARD no original description	1.03245	0.939006
11771253	glyma01g36520	weakly similar to ( 150)AT4G35690| Symbols: | similar to unknown protein [Arabidopsis thaliana] (TAIR:AT4G35710.1); similar to unnamed protein product [Vitis vinifera] (GB:CAO22786.1); contains InterPro domain Protein of unknown function DUF241, plant (InterPro:IPR004320) | chr4:16921891-16922745 FORWARD no original description	1.06652	0.940478
11771256	glyma01g36540	weakly similar to ( 151)AT4G35690| Symbols: | similar to unknown protein [Arabidopsis thaliana] (TAIR:AT4G35710.1); similar to unnamed protein product [Vitis vinifera] (GB:CAO22786.1); contains InterPro domain Protein of unknown function DUF241, plant (InterPro:IPR004320) | chr4:16921891-16922745 FORWARD no original description	-1.1634	0.68848
11771259	glyma01g36550	weakly similar to ( 151)AT4G35690| Symbols: | similar to unknown protein [Arabidopsis thaliana] (TAIR:AT4G35710.1); similar to unnamed protein product [Vitis vinifera] (GB:CAO22786.1); contains InterPro domain Protein of unknown function DUF241, plant (InterPro:IPR004320) | chr4:16921891-16922745 FORWARD no original description	-1.00209	0.996752
11771261	glyma01g36560	weakly similar to ( 130)AT4G35690| Symbols: | similar to unknown protein [Arabidopsis thaliana] (TAIR:AT4G35710.1); similar to unnamed protein product [Vitis vinifera] (GB:CAO22786.1); contains InterPro domain Protein of unknown function DUF241, plant (InterPro:IPR004320) | chr4:16921891-16922745 FORWARD no original description	-1.02952	0.934044
11771265	glyma01g36570	weakly similar to ( 149)AT4G35690| Symbols: | similar to unknown protein [Arabidopsis thaliana] (TAIR:AT4G35710.1); similar to unnamed protein product [Vitis vinifera] (GB:CAO22786.1); contains InterPro domain Protein of unknown function DUF241, plant (InterPro:IPR004320) | chr4:16921891-16922745 FORWARD no original description	1.80776	0.379406
11771267	glyma01g36590	highly similar to ( 529)AT1G47670| Symbols: | amino acid transporter family protein | chr1:17539274-17541926 REVERSE no original description	-1.68785	0.22412
11771275	glyma01g36620	weakly similar to ( 168)AT4G35770| Symbols: SEN1, ATSEN1, DIN1 | SEN1 (DARK INDUCIBLE 1) | chr4:16945078-16945969 FORWARDweakly similar to ( 160)DIN1_RAPSA no original description	1.90185	0.051701
11771291	glyma01g36720	very weakly similar to (93.6)AT2G17710| Symbols: | similar to unnamed protein product [Vitis vinifera] (GB:CAO42932.1) | chr2:7700938-7701636 FORWARD no original description	-5.06231	0.027236
11771297	glyma01g36740	moderately similar to ( 404)AT1G20270| Symbols: | oxidoreductase, 2OG-Fe(II) oxygenase family protein | chr1:7021373-7022913 REVERSE no original description	1.00406	0.977351
11771308	glyma01g36760	moderately similar to ( 337)AT4G35840| Symbols: | zinc finger (C3HC4-type RING finger) family protein | chr4:16981087-16982269 FORWARD no original description	-1.29189	0.131794
11771316	glyma01g36770	moderately similar to ( 380)AT2G17760| Symbols: | aspartyl protease family protein | chr2:7720570-7723351 FORWARD no original description	1.15616	0.635696
11771335	glyma01g36780	moderately similar to ( 436)AT5G42180| Symbols: | peroxidase 64 (PER64) (P64) (PRXR4) | chr5:16869930-16871249 FORWARDmoderately similar to ( 269)PER1_ORYSA no original description	-2.59809	0.0413465
11771343	glyma01g36800	weakly similar to ( 141)AT4G35890| Symbols: | La domain-containing protein | chr4:16997436-17000413 FORWARD no original description	1.16806	0.267269
11771351	glyma01g36810	no original description	-1.04411	0.75576
11771353	glyma01g36840	moderately similar to ( 490)AT3G51320| Symbols: | binding | chr3:19060832-19062424 REVERSE no original description	-1.25097	0.579061
11771356	glyma01g36870	nearly identical (1208)AT2G17790| Symbols: | similar to unknown protein [Arabidopsis thaliana] (TAIR:AT3G51310.1); similar to binding [Arabidopsis thaliana] (TAIR:AT1G75850.1); similar to unnamed protein product [Vitis vinifera] (GB:CAO60958.1); similar to hypothetical protein OsI_013447 [Oryza sativa (indica cultivar-group)] (GB:EAY92214.1); similar to unnamed protein product [Vitis vinifera] (G…	1.38659	0.0639722
11771379	glyma01g36900	weakly similar to ( 107)AT2G24960| Symbols: | similar to unknown protein [Arabidopsis thaliana] (TAIR:AT4G02210.1); similar to hypothetical protein [Vitis vinifera] (GB:CAN61085.1) | chr2:10624342-10627113 FORWARD no original description	1.3046	0.167287
11771383	glyma01g36930	weakly similar to ( 115)AT4G35970| Symbols: APX5 | APX5; L-ascorbate peroxidase/ peroxidase | chr4:17028654-17030208 FORWARDweakly similar to ( 116)APX4_ORYSA no original description	1.03988	0.898653
11771390	glyma01g36940	moderately similar to ( 284)AT4G35000| Symbols: APX3 | APX3 (ASCORBATE PEROXIDASE 3); L-ascorbate peroxidase | chr4:16665012-16667546 REVERSEmoderately similar to ( 279)APX4_ORYSA no original description	-1.11609	0.693632
11771401	glyma01g37130	weakly similar to ( 170)AT5G66230| Symbols: | similar to unknown protein [Arabidopsis thaliana] (TAIR:AT3G51230.1); similar to unnamed protein product [Vitis vinifera] (GB:CAO48217.1) | chr5:26479930-26481099 FORWARD no original description	1.06289	0.901679
11771407	glyma01g37150	no original description	1.0465	0.870752
11771414	glyma01g37190	weakly similar to ( 137)AT2G17950| Symbols: PGA6, WUS | WUS (WUSCHEL); DNA binding / transcription factor | chr2:7816182-7817753 REVERSEweakly similar to ( 199)WUS_PETHY no original description	-1.0161	0.960537
11771418	glyma01g37220	weakly similar to ( 159)AT2G21220| Symbols: | auxin-responsive protein, putative | chr2:9096461-9096775 FORWARDvery weakly similar to (85.1)AX15A_SOYBN no original description	1.24063	0.785114
11771421	glyma01g37250	moderately similar to ( 432)AT4G36130| Symbols: | 60S ribosomal protein L8 (RPL8C) | chr4:17097616-17098659 FORWARDmoderately similar to ( 412)RL8_TOBAC no original description	-2.15067	0.0182145
11771426	glyma01g37260	weakly similar to ( 117)AT1G19860| Symbols: | zinc finger (CCCH-type) family protein | chr1:6891645-6894391 REVERSE no original description	-1.37948	0.0776889
11771433	glyma01g37270	highly similar to ( 656)AT3G51160| Symbols: MUR_1, GMD2, MUR1 | MUR1 (MURUS 1) | chr3:19018211-19019332 REVERSE no original description	-1.10126	0.672923
11771440	glyma01g37320	weakly similar to ( 174)AT4G34720| Symbols: VHA-C1, ATVHA-C1, AVA-P1 | AVA-P1 (vacuolar H+-pumping ATPase 16 kDa proteolipid subunit 1); ATPase/ hydrogen ion transporting ATPase, rotational mechanism | chr4:16568228-16569170 REVERSEweakly similar to ( 176)VATL_PHAAU no original description	1.39146	0.0544611
11771445	glyma01g37360	weakly similar to ( 168)AT1G80160| Symbols: | lactoylglutathione lyase family protein / glyoxalase I family protein | chr1:30156172-30156822 FORWARD no original description	-1.0562	0.895241
11771451	glyma01g37370	moderately similar to ( 207)AT4G38960| Symbols: | zinc finger (B-box type) family protein | chr4:18162294-18163039 FORWARD no original description	-2.82796	0.0160248
11771465	glyma01g37400	highly similar to ( 579)AT3G51120| Symbols: | zinc finger (CCCH-type) family protein | chr3:18997006-19002680 REVERSE no original description	1.10076	0.737757
11771476	glyma01g37410	moderately similar to ( 260)AT2G18090| Symbols: | PHD finger family protein / SWIB complex BAF60b domain-containing protein / GYF domain-containing protein | chr2:7871583-7874399 FORWARD no original description	1.23118	0.106902
11771483	glyma01g37420	highly similar to ( 634)AT4G36210| Symbols: | similar to unknown protein [Arabidopsis thaliana] (TAIR:AT2G18100.1); similar to unnamed protein product [Vitis vinifera] (GB:CAO48261.1); contains InterPro domain Protein of unknown function DUF726 (InterPro:IPR007941) | chr4:17130357-17134305 FORWARD no original description	1.36948	0.30843
11771500	glyma01g37500	highly similar to ( 826)AT4G36390| Symbols: | radical SAM domain-containing protein / TRAM domain-containing protein | chr4:17194749-17197057 REVERSEhighly similar to ( 825)CK5P1_ORYSA no original description	-2.34225	0.099967
11771505	glyma01g37510	highly similar to ( 518)AT4G36380| Symbols: ROT3 | ROT3 (ROTUNDIFOLIA 3); oxygen binding / steroid hydroxylase | chr4:17187976-17192205 REVERSEmoderately similar to ( 386)C90D2_ORYSA no original description	-1.08549	0.759579
11771519	glyma01g37540	nearly identical (1439)AT4G36360| Symbols: BGAL3 | BGAL3 (beta-galactosidase 3); beta-galactosidase | chr4:17176843-17181146 REVERSEnearly identical (1109)BGAL_ASPOF no original description	-2.65961	0.0577398
11771541	glyma01g37580	nearly identical (1148)AT3G51050| Symbols: | FG-GAP repeat-containing protein | chr3:18965004-18968679 FORWARD no original description	1.02995	0.851013
11771557	glyma01g37600	highly similar to ( 907)AT3G51070| Symbols: | dehydration-responsive protein-related | chr3:18980048-18983271 FORWARD no original description	1.12905	0.554297
11771567	glyma01g37620	moderately similar to ( 383)AT5G35450| Symbols: | disease resistance protein (CC-NBS-LRR class), putative | chr5:13685039-13687915 FORWARD no original description	1.65576	0.0214441
11771574	glyma01g37710	moderately similar to ( 205)AT5G66450| Symbols: | phosphatidic acid phosphatase-related / PAP2-related | chr5:26552204-26553177 FORWARD no original description	1.24444	0.272963
11771592	glyma01g37860	moderately similar to ( 334)AT2G18245| Symbols: | similar to unknown protein [Arabidopsis thaliana] (TAIR:AT3G19970.1); similar to unnamed protein product [Vitis vinifera] (GB:CAO22826.1); contains InterPro domain Protein of unknown function DUF829, eukaryotic (InterPro:IPR008547) | chr2:7944435-7946464 FORWARD no original description	-2.55321	0.0461839
11771599	glyma01g37870	weakly similar to ( 179)AT2G18250| Symbols: ATCOAD | ATCOAD (4-PHOSPHOPANTETHEINE ADENYLYLTRANSFERASE); nucleotidyltransferase/ pantetheine-phosphate adenylyltransferase | chr2:7947107-7948581 FORWARD no original description	-2.01337	0.078505
11771608	glyma01g37880	moderately similar to ( 333)AT2G18260| Symbols: ATSYP112, SYP112 | SYP112 (syntaxin 112); SNAP receptor | chr2:7949357-7950274 FORWARD no original description	-1.06891	0.802356
11771610	glyma01g37890	highly similar to ( 603)AT5G66520| Symbols: | pentatricopeptide (PPR) repeat-containing protein | chr5:26569105-26570967 FORWARDweakly similar to ( 115)RF1_ORYSA no original description	-1.43114	0.0289822
11771613	glyma01g37910	moderately similar to ( 422)AT5G48330| Symbols: | regulator of chromosome condensation (RCC1) family protein | chr5:19603215-19604955 FORWARD no original description	1.0184	0.905184
11771619	glyma01g37940	moderately similar to ( 497)AT2G18280| Symbols: AtTLP2 | AtTLP2 (TUBBY LIKE PROTEIN 2); phosphoric diester hydrolase/ transcription factor | chr2:7953836-7955258 FORWARD no original description	1.37997	0.0851716
11771627	glyma01g37960	very weakly similar to (92.4)AT1G75250| Symbols: | myb family transcription factor | chr1:28248124-28249114 REVERSE no original description	-1.12812	0.554494
11771631	glyma01g37970	highly similar to ( 714)AT2G18330| Symbols: | AAA-type ATPase family protein | chr2:7972911-7975997 FORWARD no original description	-1.81699	0.0426158
11771642	glyma01g37980	no original description	1.89454	0.15892
11771654	glyma01g38040	moderately similar to ( 463)AT4G36670| Symbols: | mannitol transporter, putative | chr4:17287684-17289487 REVERSEweakly similar to ( 144)HEX6_RICCO no original description	1.48923	0.219922
11771662	glyma01g38060	moderately similar to ( 422)AT1G75160| Symbols: | similar to unknown protein [Arabidopsis thaliana] (TAIR:AT5G05840.1); similar to unnamed protein product [Vitis vinifera] (GB:CAO61175.1); contains InterPro domain Protein of unknown function DUF620 (InterPro:IPR006873) | chr1:28213195-28215285 FORWARD no original description	1.44852	0.235508
11771666	glyma01g38070	weakly similar to ( 191)AT5G65650| Symbols: | similar to unknown protein [Arabidopsis thaliana] (TAIR:AT4G36660.1); similar to unknown [Populus trichocarpa] (GB:ABK93535.1); contains InterPro domain Protein of unknown function DUF1195 (InterPro:IPR010608) | chr5:26256814-26258421 FORWARD no original description	1.01392	0.95892
11771673	glyma01g38090	highly similar to ( 550)AT4G36650| Symbols: | transcription factor IIB (TFIIB) family protein | chr4:17283605-17285532 REVERSEvery weakly similar to (94.0)TF2B_ORYSA no original description	1.14513	0.179566
11771679	glyma01g38110	highly similar to ( 540)AT2G18470| Symbols: | protein kinase family protein | chr2:8012367-8014849 REVERSEmoderately similar to ( 254)PSKR_DAUCA no original description	-1.07663	0.916864
11771688	glyma01g38120	moderately similar to ( 253)AT3G50670| Symbols: U1SNRNP, U1-70K | U1-70K (SPLICEOSOMAL PROTEIN U1A); RNA binding | chr3:18839213-18840473 REVERSE no original description	-1.14232	0.338368
11771701	glyma01g38130	moderately similar to ( 396)AT2G25737| Symbols: | similar to unknown protein [Arabidopsis thaliana] (TAIR:AT2G36630.1); similar to unnamed protein product [Vitis vinifera] (GB:CAO44067.1); contains InterPro domain Protein of unknown function DUF81; (InterPro:IPR002781) | chr2:10984252-10986755 FORWARD no original description	-1.69481	0.303209
11771716	glyma01g38140	weakly similar to ( 103)AT2G01050| Symbols: | nucleic acid binding / zinc ion binding | chr2:68337-69884 REVERSE no original description	1.17698	0.645385
11771721	glyma01g38150	highly similar to ( 988)AT5G66750| Symbols: SOM4, SOM1, CHR1, CHA1, DDM1, CHR01 | CHR01/DDM1 (DECREASED DNA METHYLATION 1); helicase | chr5:26666276-26670095 FORWARDmoderately similar to ( 427)ISW2_ORYSA no original description	1.86532	0.0608433
11771748	glyma01g38180	highly similar to ( 746)AT3G50660| Symbols: CYP90B1, CLM, SNP2, DWF4 | DWF4 (DWARF 4) | chr3:18825243-18828149 REVERSEmoderately similar to ( 413)C724B_ORYSA no original description	-2.10875	0.0921313
11771758	glyma01g38200	nearly identical (1003)AT5G66760| Symbols: SDH1-1 | SDH1-1 (Succinate dehydrogenase 1-1) | chr5:26671002-26674450 FORWARDhighly similar to ( 981)DHSA_ORYSA no original description	1.39048	0.090737
11771789	glyma01g38240	nearly identical (1358)AT4G36630| Symbols: EMB2754 | EMB2754 (EMBRYO DEFECTIVE 2754); binding / small GTPase regulator | chr4:17272094-17276528 REVERSE no original description	1.00471	0.988857
11771803	glyma01g38250	very weakly similar to (92.8)AT4G39250| Symbols: | DNA binding / transcription factor | chr4:18271451-18271851 REVERSE no original description	1.36411	0.104918
11771805	glyma01g38290	moderately similar to ( 389)AT3G50700| Symbols: ATIDD2 | ATIDD2 (ARABIDOPSIS THALIANA INDETERMINATE(ID)-DOMAIN 2); nucleic acid binding / transcription factor/ zinc ion binding | chr3:18851926-18853810 FORWARD no original description	1.76243	0.0271453
11771812	glyma01g38300	highly similar to ( 687)AT5G39350| Symbols: | pentatricopeptide (PPR) repeat-containing protein | chr5:15768157-15770190 FORWARDweakly similar to ( 114)RF1_ORYSA no original description	-1.03124	0.904743
11771819	glyma01g38340	moderately similar to ( 283)AT2G18540| Symbols: | cupin family protein | chr2:8049464-8052090 REVERSE no original description	-1.00614	0.984534
11771827	glyma01g38360	moderately similar to ( 469)AT4G36710| Symbols: | scarecrow transcription factor family protein | chr4:17306064-17307524 FORWARDweakly similar to ( 103)DWRF8_MAIZE no original description	1.04519	0.833422
11771831	glyma01g38370	moderately similar to ( 255)AT4G36720| Symbols: HVA22K | HVA22K (HVA22-LIKE PROTEIN K) | chr4:17307773-17309672 FORWARD no original description	1.07899	0.847457
11771842	glyma01g38400	moderately similar to ( 291)AT4G36750| Symbols: | quinone reductase family protein | chr4:17324647-17326220 FORWARD no original description	1.05987	0.726794
11771847	glyma01g38410	highly similar to ( 523)AT4G36760| Symbols: APP1, ATAPP1 | ATAPP1 (aminopeptidase P1) | chr4:17326727-17329461 FORWARD no original description	1.51512	0.0260475
11771877	glyma01g38460	highly similar to ( 612)AT4G36790| Symbols: | transporter-related | chr4:17336365-17338309 FORWARD no original description	1.53421	0.0194161
11771884	glyma01g38480	moderately similar to ( 252)AT2G18620| Symbols: | geranylgeranyl pyrophosphate synthase, putative / GGPP synthetase, putative / farnesyltranstransferase, putative | chr2:8085399-8086442 FORWARDmoderately similar to ( 267)GGPPS_HEVBR no original description	1.03021	0.927515
11771888	glyma01g38490	moderately similar to ( 312)AT2G18630| Symbols: | Identical to UPF0496 protein At2g18630 [Arabidopsis Thaliana] (GB:Q56XQ0;GB:Q9ZNR3); similar to unknown protein [Arabidopsis thaliana] (TAIR:AT5G66675.1); similar to unnamed protein product [Vitis vinifera] (GB:CAO22906.1); contains InterPro domain Protein of unknown function DUF677 (InterPro:IPR007749) | chr2:8088236-8089578 FORWARD no original d…	1.28039	0.300447
11771893	glyma01g38500	moderately similar to ( 314)AT2G23790| Symbols: | similar to unknown protein [Arabidopsis thaliana] (TAIR:AT4G36820.1); similar to unnamed protein product [Vitis vinifera] (GB:CAO22909.1); contains InterPro domain Protein of unknown function DUF607 (InterPro:IPR006769) | chr2:10132772-10134535 REVERSE no original description	1.47092	0.271903
11771898	glyma01g38510	moderately similar to ( 261)AT2G23780| Symbols: | zinc finger (C3HC4-type RING finger) family protein | chr2:10130631-10131314 REVERSE no original description	1.01845	0.952145
11771902	glyma01g38520	moderately similar to ( 438)AT3G50760| Symbols: GATL2 | GATL2 (Galacturonosyltransferase-like 2); polygalacturonate 4-alpha-galacturonosyltransferase/ transferase, transferring glycosyl groups / transferase, transferring hexosyl groups | chr3:18879055-18880080 FORWARD no original description	-2.22603	0.0492858
11771905	glyma01g38540	moderately similar to ( 380)AT5G09280| Symbols: | pectate lyase family protein | chr5:2880424-2881598 REVERSEmoderately similar to ( 249)PEL_TOBAC no original description	1.00005	0.999889
11771911	glyma01g38550	moderately similar to ( 471)AT2G23770| Symbols: | protein kinase family protein / peptidoglycan-binding LysM domain-containing protein | chr2:10127322-10129160 REVERSEweakly similar to ( 137)KPRO_MAIZE no original description	1.87104	0.0875244
11771914	glyma01g38580	nearly identical (3007)AT3G11130| Symbols: | clathrin heavy chain, putative | chr3:3482581-3491673 REVERSE no original description	-1.14627	0.379567
11771946	glyma01g38650	moderately similar to ( 373)AT2G23760| Symbols: SAW2, BLH4 | BLH4 (SAWTOOTH 2); DNA binding | chr2:10115031-10119816 REVERSE no original description	-2.43525	0.0082138
11771957	glyma01g38680	highly similar to ( 629)AT5G66600| Symbols: | similar to unknown protein [Arabidopsis thaliana] (TAIR:AT2G23700.1); similar to unnamed protein product [Vitis vinifera] (GB:CAO45439.1); similar to hypothetical protein [Vitis vinifera] (GB:CAN83308.1); contains InterPro domain Protein of unknown function DUF547 (InterPro:IPR006869) | chr5:26592331-26595541 REVERSE no original description	-3.33736	0.0188203
11771983	glyma01g38830	highly similar to ( 521)AT3G50420| Symbols: | pentatricopeptide (PPR) repeat-containing protein | chr3:18721852-18724630 REVERSE no original description	1.0422	0.885983
11771988	glyma01g38860	moderately similar to ( 291)AT2G23530| Symbols: | similar to protein binding / zinc ion binding [Arabidopsis thaliana] (TAIR:AT4G37110.1); similar to unnamed protein product [Vitis vinifera] (GB:CAO44617.1) | chr2:10027732-10029884 REVERSE no original description	-1.16466	0.643634
11771996	glyma01g38870	moderately similar to ( 500)AT4G31940| Symbols: CYP82C4 | CYP82C4 (cytochrome P450, family 82, subfamily C, polypeptide 4); oxygen binding | chr4:15452046-15453972 FORWARDhighly similar to ( 513)C82A3_SOYBN no original description	-1.36897	0.133966
11772001	glyma01g38880	highly similar to ( 536)AT4G31940| Symbols: CYP82C4 | CYP82C4 (cytochrome P450, family 82, subfamily C, polypeptide 4); oxygen binding | chr4:15452046-15453972 FORWARDhighly similar to ( 552)C82A3_SOYBN no original description	-1.40568	0.393987
11772005	glyma01g38920	highly similar to ( 714)AT2G23450| Symbols: | protein kinase family protein | chr2:9996006-9998324 REVERSEmoderately similar to ( 222)NORK_MEDTR no original description	3.80884	0.019222
11772014	glyma01g38950	weakly similar to ( 113)AT2G23610| Symbols: | esterase, putative | chr2:10051490-10053483 REVERSE no original description	-1.58812	0.0993455
11772020	glyma01g38970	weakly similar to ( 119)AT5G60850| Symbols: OBP4 | OBP4 (OBF BINDING PROTEIN 4); DNA binding / transcription factor | chr5:24497804-24498727 FORWARDweakly similar to ( 105)PBF_MAIZE no original description	1.29989	0.25736
11772024	glyma01g38990	very weakly similar to (84.7)AT2G23640| Symbols: | reticulon family protein (RTNLB13) | chr2:10064634-10066122 FORWARD no original description	1.90781	0.0964109
11772029	glyma01g39000	moderately similar to ( 428)AT5G66900| Symbols: | disease resistance protein (CC-NBS-LRR class), putative | chr5:26732157-26734983 REVERSE no original description	1.20236	0.29815
11772037	glyma01g39010	moderately similar to ( 422)AT5G66900| Symbols: | disease resistance protein (CC-NBS-LRR class), putative | chr5:26732157-26734983 REVERSE no original description	2.50354	0.0325344
11772046	glyma01g39030	moderately similar to ( 219)AT3G19080| Symbols: | SWIB complex BAF60b domain-containing protein | chr3:6596088-6598673 FORWARD no original description	1.41838	0.0420439
11772056	glyma01g39040	weakly similar to ( 165)AT4G37180| Symbols: | myb family transcription factor | chr4:17504642-17506101 FORWARD no original description	1.02868	0.882753
11772063	glyma01g39050	highly similar to ( 633)AT4G37190| Symbols: | similar to Os03g0240900 [Oryza sativa (japonica cultivar-group)] (GB:NP_001049512.1); similar to Os12g0586400 [Oryza sativa (japonica cultivar-group)] (GB:NP_001067157.1); similar to hypothetical protein OsI_037654 [Oryza sativa (indica cultivar-group)] (GB:EAY83695.1); contains InterPro domain Tubulin/FtsZ, GTPase; (InterPro:IPR003008) | chr4:1750744…	-1.16896	0.1913
11772075	glyma01g39070	moderately similar to ( 473)AT5G66850| Symbols: MAPKKK5 | MAPKKK5 (Mitogen-activated protein kinase kinase kinase 5); kinase | chr5:26713191-26716385 REVERSEweakly similar to ( 120)M2K1_ORYSA no original description	1.25411	0.149059
11772088	glyma01g39080	moderately similar to ( 365)AT1G49570| Symbols: | peroxidase, putative | chr1:18350745-18352380 FORWARDmoderately similar to ( 283)PER1_ARAHY no original description	-1.06543	0.845144
11772093	glyma01g39090	highly similar to ( 874)AT3G50530| Symbols: CRK | CRK (CDPK-RELATED KINASE); calcium ion binding / calcium-dependent protein serine/threonine phosphatase/ kinase | chr3:18764814-18767468 FORWARDhighly similar to ( 866)CRK_DAUCA no original description	-3.78664	0.084894
11772106	glyma01g39100	moderately similar to ( 234)AT5G66840| Symbols: | SAP domain-containing protein | chr5:26710148-26712522 REVERSE no original description	1.60376	0.0113181
11772117	glyma01g39110	nearly identical (2126)AT3G50590| Symbols: | transducin family protein / WD-40 repeat family protein | chr3:18782273-18790201 FORWARD no original description	1.14816	0.631694
11772147	glyma01g39220	no original description	-2.6239	0.00964565
11772154	glyma01g39280	moderately similar to ( 399)AT4G36980| Symbols: | similar to unnamed protein product [Vitis vinifera] (GB:CAO71849.1); contains domain SPLICING FACTOR (SUPPRESSOR OF WHITE APRICOT) (PTHR13161) | chr4:17434277-17437006 REVERSE no original description	-1.26623	0.0964747
11772170	glyma01g39290	moderately similar to ( 499)AT5G67020| Symbols: | similar to unknown protein [Arabidopsis thaliana] (TAIR:AT3G50340.1); similar to unknown protein [Oryza sativa (japonica cultivar-group)] (GB:BAD09363.1); contains domain DHS-like NAD/FAD-binding domain (SSF52467) | chr5:26767188-26768372 FORWARD no original description	-2.18716	0.0630961
11772178	glyma01g39320	weakly similar to ( 149)AT4G36970| Symbols: | remorin family protein | chr4:17429821-17431454 REVERSE no original description	-1.49373	0.390769
11772185	glyma01g39340	no original description	1.44426	0.221581
11772190	glyma01g39370	weakly similar to ( 127)AT5G67070| Symbols: RALFL34 | RALFL34 (RALF-LIKE 34) | chr5:26785346-26785735 FORWARD no original description	-1.00017	0.999428
11772194	glyma01g39380	moderately similar to ( 341)AT4G36950| Symbols: MAPKKK21 | MAPKKK21; ATP binding / protein kinase | chr4:17422830-17423840 REVERSEweakly similar to ( 101)M2K1_ORYSA no original description	-1.31459	0.63583
11772197	glyma01g39390	no original description	1.27766	0.726581
11772205	glyma01g39410	moderately similar to ( 385)AT4G36945| Symbols: | phospholipase C | chr4:17420124-17422043 REVERSE no original description	-1.63553	0.0309897
11772215	glyma01g39430	nearly identical (1639)AT5G67100| Symbols: ICU2 | ICU2 (INCURVATA2); DNA-directed DNA polymerase | chr5:26794220-26802330 FORWARDnearly identical (1538)DPOLA_ORYSA no original description	-1.18121	0.547779
11772248	glyma01g39460	moderately similar to ( 407)AT4G34050| Symbols: | caffeoyl-CoA 3-O-methyltransferase, putative | chr4:16310849-16311978 FORWARDmoderately similar to ( 410)CAMT_MEDSA no original description	-1.72841	0.122862
11772256	glyma01g39470	moderately similar to ( 293)AT5G67140| Symbols: | F-box family protein | chr5:26811235-26812439 REVERSE no original description	1.13545	0.630191
11772264	glyma01g39500	moderately similar to ( 447)AT4G34090| Symbols: | similar to unknown protein [Arabidopsis thaliana] (TAIR:AT2G23370.1); similar to unnamed protein product [Vitis vinifera] (GB:CAO47838.1) | chr4:16328056-16330115 REVERSE no original description	-3.19115	0.0377724
11772277	glyma01g39530	moderately similar to ( 213)AT4G36910| Symbols: LEJ2 | LEJ2 (LOSS OF THE TIMING OF ET AND JA BIOSYNTHESIS 2) | chr4:17391013-17393215 REVERSE no original description	1.43762	0.419536
11772289	glyma01g39570	moderately similar to ( 276)AT2G36780| Symbols: | UDP-glucoronosyl/UDP-glucosyl transferase family protein | chr2:15424697-15426187 REVERSEweakly similar to ( 136)ZOX_PHAVU no original description	1.05791	0.905228
11772292	glyma01g39590	moderately similar to ( 438)AT5G67210| Symbols: | nucleic acid binding / pancreatic ribonuclease | chr5:26836245-26837198 FORWARD no original description	-1.59279	0.393604
11772296	glyma01g39610	highly similar to ( 537)AT5G67230| Symbols: | glycosyl transferase family 43 protein | chr5:26839732-26841407 FORWARD no original description	1.03803	0.859582
11772305	glyma01g39630	highly similar to ( 587)AT3G50120| Symbols: | similar to unknown protein [Arabidopsis thaliana] (TAIR:AT3G50150.1); similar to unknown protein [Arabidopsis thaliana] (TAIR:AT3G50130.1); similar to unknown protein [Arabidopsis thaliana] (TAIR:AT3G50170.1); similar to unnamed protein product [Vitis vinifera] (GB:CAO71911.1); similar to hypothetical protein [Vitis vinifera] (GB:CAN59797.1); contains…	-1.31791	0.109251
11772309	glyma01g39650	highly similar to ( 603)AT3G19420| Symbols: | phosphoric monoester hydrolase | chr3:6731830-6735360 FORWARD no original description	-1.2612	0.554228
11772326	glyma01g39690	moderately similar to ( 287)AT5G67260| Symbols: CYCD3;2 | CYCD3;2 (CYCLIN D3;2); cyclin-dependent protein kinase | chr5:26853539-26854891 FORWARD no original description	1.0289	0.930733
11772334	glyma01g39740	moderately similar to ( 265)AT4G37260| Symbols: MYB73, AtMYB73 | AtMYB73/MYB73 (myb domain protein 73); DNA binding / transcription factor | chr4:17540596-17541558 FORWARDweakly similar to ( 109)MYB1_HORVU no original description	-1.38512	0.169783
11772338	glyma01g39750	weakly similar to ( 125)AT4G37300| Symbols: MEE59 | MEE59 (maternal effect embryo arrest 59) | chr4:17554799-17555492 FORWARD no original description	1.06405	0.825168
11772345	glyma01g39770	no original description	-2.03888	0.0214509
11772350	glyma01g39780	highly similar to ( 922)AT2G14960| Symbols: GH3.1 | GH3.1 | chr2:6458741-6460752 REVERSEhighly similar to ( 869)GH38_ORYSA no original description	-1.14833	0.179612
11772355	glyma01g39790	highly similar to ( 753)AT2G23150| Symbols: ATNRAMP3, NRAMP3 | NRAMP3 (NRAMP metal ion transporter 3); manganese ion transmembrane transporter/ metal ion transmembrane transporter | chr2:9863502-9865645 REVERSE no original description	-1.15071	0.015076
11772362	glyma01g39800	highly similar to ( 692)AT5G43100| Symbols: | aspartyl protease family protein | chr5:17316492-17319946 FORWARDvery weakly similar to (91.7)ASP1_ORYSA no original description	1.17701	0.252544
11772378	glyma01g39820	moderately similar to ( 437)AT5G43120| Symbols: | tetratricopeptide repeat (TPR)-containing protein | chr5:17329830-17331596 FORWARD no original description	1.21663	0.595418
11772383	glyma01g39880	moderately similar to ( 375)AT4G37480| Symbols: | DNAJ heat shock N-terminal domain-containing protein | chr4:17619255-17621396 FORWARD no original description	-1.32186	0.156721
11772388	glyma01g39900	moderately similar to ( 348)AT4G33910| Symbols: | oxidoreductase, 2OG-Fe(II) oxygenase family protein | chr4:16256948-16258619 REVERSE no original description	1.22282	0.652866
11772405	glyma01g39970	highly similar to ( 749)AT5G67385| Symbols: | signal transducer | chr5:26901980-26904309 FORWARDmoderately similar to ( 227)NPH3_ORYSA no original description	-2.33797	0.0436532
11772412	glyma01g39990	moderately similar to ( 432)AT4G37530| Symbols: | peroxidase, putative | chr4:17634780-17636002 FORWARDmoderately similar to ( 223)PER1_ORYSA no original description	-1.34518	0.367211
11772426	glyma01g40050	highly similar to ( 548)AT2G23060| Symbols: | GCN5-related N-acetyltransferase (GNAT) family protein | chr2:9819919-9821279 REVERSE no original description	1.20602	0.526734
11772432	glyma01g40080	highly similar to ( 549)AT5G67470| Symbols: | formin homology 2 domain-containing protein / FH2 domain-containing protein | chr5:26944061-26947438 FORWARD no original description	1.12737	0.58241
11772439	glyma01g40100	weakly similar to ( 123)AT4G37630| Symbols: CYCD5;1 | CYCD5;1 (CYCLIN D5;1); cyclin-dependent protein kinase | chr4:17679491-17680782 FORWARD no original description	-1.08675	0.784673
11772445	glyma01g40110	highly similar to ( 828)AT1G64960| Symbols: | binding | chr1:24133581-24137712 FORWARD no original description	1.14878	0.316653
11772455	glyma01g40140	moderately similar to ( 335)AT5G67500| Symbols: | porin, putative | chr5:26952449-26954349 FORWARDmoderately similar to ( 243)VDAC1_SOLTU no original description	1.26025	0.0265909
11772464	glyma01g40160	weakly similar to ( 195)AT3G49900| Symbols: | BTB/POZ domain-containing protein | chr3:18511620-18513599 REVERSE no original description	1.87184	0.0295117
11772470	glyma01g40170	highly similar to ( 771)AT5G67530| Symbols: | peptidyl-prolyl cis-trans isomerase cyclophilin-type family protein | chr5:26958486-26961104 FORWARDvery weakly similar to (85.5)CYPH_LUPLU no original description	-1.15986	0.42315
11772484	glyma01g40180	highly similar to ( 551)AT4G37650| Symbols: SGR7, SHR | SHR (SHORT ROOT); transcription factor | chr4:17691865-17693460 FORWARDweakly similar to ( 176)CIGR2_ORYSA no original description	-1.56521	0.0205801
11772488	glyma01g40210	moderately similar to ( 306)AT3G49870| Symbols: ATARLA1C | ATARLA1C (ADP-ribosylation factor-like A1C); GTP binding | chr3:18503659-18505006 REVERSEvery weakly similar to (99.8)ARF_MAIZE no original description	1.15924	0.488375
11772500	glyma01g40260	highly similar to ( 582)AT4G37680| Symbols: HHP4 | HHP4 (heptahelical protein 4); receptor | chr4:17701225-17702562 FORWARD no original description	-1.34733	0.149708
11772507	glyma01g40270	highly similar to ( 533)AT2G22900| Symbols: | galactosyl transferase GMA12/MNN10 family protein | chr2:9751439-9753273 REVERSE no original description	-2.07927	0.0232954
11772516	glyma01g40310	highly similar to ( 626)AT3G49810| Symbols: | U-box domain-containing protein | chr3:18485921-18487267 REVERSEweakly similar to ( 107)SPL11_ORYSA no original description	-1.31227	0.32707
11772519	glyma01g40320	no original description	-5.93741	0.0608327
11772523	glyma01g40330	moderately similar to ( 270)AT3G49800| Symbols: | BSD domain-containing protein | chr3:18482942-18484661 REVERSE no original description	1.38046	0.590616
11772529	glyma01g40350	moderately similar to ( 231)AT1G10150| Symbols: ATPP2-A10 | ATPP2-A10 (Phloem protein 2-A10); carbohydrate binding | chr1:3326162-3327406 FORWARD no original description	-1.19719	0.457606
11772533	glyma01g40370	very weakly similar to (85.5)AT4G37730| Symbols: ATBZIP7 | ATBZIP7 (ARABIDOPSIS THALIANA BASIC LEUCINE-ZIPPER 7); DNA binding / transcription factor | chr4:17723794-17724711 FORWARD no original description	1.43797	0.152576
11772535	glyma01g40380	moderately similar to ( 358)AT4G37750| Symbols: DRG, CKC, CKC1, ANT | ANT (AINTEGUMENTA); DNA binding / transcription factor | chr4:17739776-17742183 FORWARDmoderately similar to ( 308)BBM1_BRANA no original description	1.04821	0.910874
11772544	glyma01g40390	moderately similar to ( 272)AT3G49750| Symbols: | leucine-rich repeat family protein | chr3:18461589-18462413 REVERSE no original description	-1.49572	0.13664
11772548	glyma01g40400	highly similar to ( 707)AT4G37770| Symbols: ACS8 | ACS8 (1-Amino-cyclopropane-1-carboxylate synthase 8) | chr4:17752216-17753919 FORWARDhighly similar to ( 728)1A12_CUCMA no original description	-1.02164	0.930065
11772558	glyma01g40450	moderately similar to ( 219)AT4G37790| Symbols: HAT22 | HAT22 (homeobox-leucine zipper protein 22); transcription factor | chr4:17768235-17769266 FORWARD no original description	1.30372	0.348618
11772564	glyma01g40470	very weakly similar to (94.4)AT4G37810| Symbols: | similar to unknown protein [Arabidopsis thaliana] (TAIR:AT5G10310.1); similar to hypothetical protein [Vitis vinifera] (GB:CAN78177.1) | chr4:17780964-17781538 FORWARD no original description	1.23147	0.639259
11772575	glyma01g40520	no original description	1.04783	0.901791
11772586	glyma01g40580	moderately similar to ( 389)AT2G22780| Symbols: PMDH1 | PMDH1 (PEROXISOMAL NAD-MALATE DEHYDROGENASE 1); malate dehydrogenase | chr2:9697075-9699003 REVERSEmoderately similar to ( 430)MDHG_SOYBN no original description	-1.30354	0.0954992
11772594	glyma01g40650	moderately similar to ( 306)AT2G35260| Symbols: | similar to unknown protein [Arabidopsis thaliana] (TAIR:AT4G17840.1); similar to hypothetical protein [Vitis vinifera] (GB:CAN74782.1); similar to unnamed protein product [Vitis vinifera] (GB:CAO63413.1) | chr2:14856721-14858680 FORWARD no original description	-1.62928	0.016722
11772608	glyma01g40680	moderately similar to ( 246)AT4G17800| Symbols: | DNA-binding protein-related | chr4:9895562-9896440 REVERSE no original description	1.00445	0.985477
11772610	glyma01g40700	highly similar to ( 811)AT5G46630| Symbols: | clathrin adaptor complexes medium subunit family protein | chr5:18937807-18940287 FORWARD no original description	1.72702	0.0685433
11772625	glyma01g40710	weakly similar to ( 120)AT4G17960| Symbols: | similar to unknown protein [Arabidopsis thaliana] (TAIR:AT5G46620.1); similar to unnamed protein product [Vitis vinifera] (GB:CAO63438.1) | chr4:9971166-9972239 FORWARD no original description	1.18708	0.134365
11772639	glyma01g40760	highly similar to ( 551)AT4G17970| Symbols: | similar to unknown protein [Arabidopsis thaliana] (TAIR:AT5G46600.1); similar to unknown protein [Arabidopsis thaliana] (TAIR:AT5G46610.1); similar to unnamed protein product [Vitis vinifera] (GB:CAO63429.1); contains InterPro domain Protein of unknown function UPF0005 (InterPro:IPR006214) | chr4:9975494-9977734 FORWARD no original description	1.34729	0.324315
11772647	glyma01g40770	moderately similar to ( 309)AT1G32500| Symbols: ATNAP6 | ATNAP6 (NON-INTRINSIC ABC PROTEIN 6); protein binding | chr1:11750071-11751974 REVERSE no original description	1.1236	0.630556
11772658	glyma01g40810	moderately similar to ( 251)AT2G35370| Symbols: GDCH | GDCH (Glycine decarboxylase complex H) | chr2:14898318-14899129 FORWARDmoderately similar to ( 268)GCSH_FLAPR no original description	-1.57779	0.191758
11772666	glyma01g40840	weakly similar to ( 195)AT5G64816| Symbols: | Identical to Uncharacterized protein At5g64816 precursor [Arabidopsis Thaliana] (GB:Q8L8Q8;GB:Q9LV96); similar to unnamed protein product [Vitis vinifera] (GB:CAO22147.1) | chr5:25930713-25931105 FORWARD no original description	-1.06534	0.8304
11772671	glyma01g40850	highly similar to ( 882)AT1G32450| Symbols: | proton-dependent oligopeptide transport (POT) family protein | chr1:11715317-11719787 REVERSE no original description	-1.28908	0.223045
11772679	glyma01g40920	moderately similar to ( 226)AT1G32990| Symbols: PRPL11 | PRPL11 (PLASTID RIBOSOMAL PROTEIN L11); structural constituent of ribosome | chr1:11955807-11957119 FORWARDmoderately similar to ( 221)RK11_SPIOL no original description	-1.58751	0.108442
11772686	glyma01g40930	weakly similar to ( 173)AT1G32410| Symbols: | vacuolar protein sorting 55 family protein / VPS55 family protein | chr1:11694378-11695277 FORWARD no original description	1.22438	0.216812
11772694	glyma01g40950	highly similar to ( 559)AT5G18070| Symbols: | DRT101 (DNA-DAMAGE-REPAIR/TOLERATION 101); intramolecular transferase, phosphotransferases | chr5:5981119-5982789 FORWARDhighly similar to ( 511)AGM1_ORYSA no original description	-1.04165	0.655216
11772705	glyma01g40960	weakly similar to ( 107)ATCG01250| Symbols: NDHB.2 | NADH dehydrogenase ND2 | chrC:141854-143708 FORWARDweakly similar to ( 113)NU2C_CUCSA no original description	-1.16884	0.281102
11772709	glyma01g40970	very weakly similar to (80.9)ATCG01280| Symbols: YCF2.2 | hypothetical protein | chrC:145291-152175 REVERSEvery weakly similar to (90.1)YCF2_SOYBN no original description	-1.00548	0.991829
11772716	glyma01g41010	highly similar to ( 512)AT1G32415| Symbols: | pentatricopeptide (PPR) repeat-containing protein | chr1:11695591-11697876 FORWARDvery weakly similar to (92.4)RF1_ORYSA no original description	1.05969	0.774221
11772730	glyma01g41050	weakly similar to ( 169)AT4G17030| Symbols: EXPR, AT-EXPR, ATEXPR1, ATHEXP BETA 3.1, ATEXLB1 | ATEXLB1 (ARABIDOPSIS THALIANA EXPANSIN-LIKE B1) | chr4:9581836-9583200 REVERSEmoderately similar to ( 291)EXLB1_ORYSA no original description	-1.03088	0.937223
11772738	glyma01g41110	nearly identical (1966)AT5G47010| Symbols: UPF1, LBA1 | LBA1/UPF1 (LOW-LEVEL BETA-AMYLASE 1); RNA helicase | chr5:19089236-19096083 FORWARD no original description	-1.02683	0.836654
11772769	glyma01g41120	moderately similar to ( 242)AT2G22740| Symbols: SUVH6 | SUVH6 (SU(VAR)3-9 HOMOLOG 6) | chr2:9671336-9673708 REVERSE no original description	4.44384	0.0182503
11772773	glyma01g41140	nearly identical (1520)AT5G47020| Symbols: | glycine-rich protein | chr5:19099232-19107027 FORWARD no original description	1.13849	0.47187
11772798	glyma01g41190	highly similar to ( 779)AT4G17090| Symbols: BMY8, BAM3, CT-BMY | CT-BMY (BETA-AMYLASE 3, BETA-AMYLASE 8); beta-amylase | chr4:9605282-9607266 REVERSEmoderately similar to ( 458)AMYB_MEDSA no original description	3.08325	0.0433797
11772805	glyma01g41210	weakly similar to ( 139)AT3G60245| Symbols: | 60S ribosomal protein L37a (RPL37aC) | chr3:22279778-22280725 FORWARDweakly similar to ( 141)RL37A_ORYSA no original description	-1.16833	0.609665
11772812	glyma01g41220	no original description	-1.0466	0.841392
11772816	glyma01g41260	highly similar to ( 509)AT4G33950| Symbols: OST1, SNRK2-6, SRK2E, SNRK2.6, P44 | OST1/P44/SNRK2-6/SRK2E (OPEN STOMATA 1, SNF1-RELATED PROTEIN KINASE 2.6) | chr4:16272824-16274662 FORWARDhighly similar to ( 514)SAPK3_ORYSA no original description	-1.67567	0.304746
11772829	glyma01g41270	moderately similar to ( 440)AT4G17070| Symbols: | peptidyl-prolyl cis-trans isomerase | chr4:9595542-9598157 REVERSE no original description	1.71453	0.323923
11772837	glyma01g41300	moderately similar to ( 218)AT5G41150| Symbols: ATRAD1, RAD1, UVH1 | UVH1 (ULTRAVIOLET HYPERSENSITIVE 1) | chr5:16491606-16494147 REVERSE no original description	-1.11997	0.139256
11772846	glyma01g41310	highly similar to ( 764)AT5G07440| Symbols: GDH2 | GDH2 (GLUTAMATE DEHYDROGENASE 2) | chr5:2356154-2357547 FORWARDhighly similar to ( 762)DHEA_NICPL no original description	-1.02903	0.936731
11772858	glyma01g41330	moderately similar to ( 327)AT4G17030| Symbols: EXPR, AT-EXPR, ATEXPR1, ATHEXP BETA 3.1, ATEXLB1 | ATEXLB1 (ARABIDOPSIS THALIANA EXPANSIN-LIKE B1) | chr4:9581836-9583200 REVERSEweakly similar to ( 191)EXLB1_ORYSA no original description	4.63274	0.0111839
11772869	glyma01g41430	highly similar to ( 602)AT2G35660| Symbols: CTF2A | CTF2A; monooxygenase | chr2:14996090-14997399 FORWARDvery weakly similar to (95.9)ABA2_NICPL no original description	-1.21143	0.467224
11772879	glyma01g41460	moderately similar to ( 384)AT4G16845| Symbols: VRN2 | VRN2 (REDUCED VERNALIZATION RESPONSE 2) | chr4:9477265-9479744 FORWARD no original description	-1.00773	0.968987
11772897	glyma01g41470	no original description	1.32049	0.375144
11772900	glyma01g41480	moderately similar to ( 340)AT4G17510| Symbols: UCH3 | UCH3; ubiquitin thiolesterase | chr4:9767127-9768661 REVERSE no original description	-1.16454	0.579864
11772911	glyma01g41510	moderately similar to ( 354)AT5G60900| Symbols: RLK1 | RLK1 (RECEPTOR-LIKE PROTEIN KINASE 1); carbohydrate binding / kinase | chr5:24515693-24518720 REVERSEmoderately similar to ( 293)KPRO_MAIZE no original description	1.29151	0.266392
11772914	glyma01g41530	no original description	-1.30694	0.506073
11772917	glyma01g41540	moderately similar to ( 269)AT5G47240| Symbols: ATNUDT8 | ATNUDT8 (Arabidopsis thaliana Nudix hydrolase homolog 8); hydrolase | chr5:19201033-19202694 FORWARD no original description	1.11829	0.713553
11772929	glyma01g41550	moderately similar to ( 289)AT5G47310| Symbols: | similar to unknown protein [Arabidopsis thaliana] (TAIR:AT4G17486.1); similar to hypothetical protein 25.t00041 [Brassica oleracea] (GB:ABD64953.1); contains InterPro domain Protein of unknown function DUF862, eukaryotic (InterPro:IPR008580) | chr5:19218552-19219901 FORWARD no original description	-1.73642	0.049684
11772937	glyma01g41560	very weakly similar to (80.9)AT5G53110| Symbols: | similar to zinc finger (C3HC4-type RING finger) family protein [Arabidopsis thaliana] (TAIR:AT2G46495.1); similar to hypothetical protein [Vitis vinifera] (GB:CAN79324.1) | chr5:21546248-21546970 FORWARD no original description	7.86064	0.0174541
11772940	glyma01g41570	moderately similar to ( 437)AT3G60340| Symbols: | palmitoyl protein thioesterase family protein | chr3:22315370-22317364 FORWARD no original description	1.1695	0.291571
11772954	glyma01g41580	weakly similar to ( 137)AT4G16780| Symbols: HAT4, ATHB2, ATHB-2 | ATHB-2 (ARABIDOPSIS THALIANA HOMEOBOX PROTEIN 2); DNA binding / transcription factor | chr4:9449310-9450623 FORWARD no original description	-1.85196	0.317415
11772961	glyma01g41590	highly similar to ( 796)AT2G39810| Symbols: HOS1 | HOS1 (High expression of osmotically responsive genes 1) | chr2:16620019-16624880 FORWARD no original description	-1.44064	0.0209399
11772973	glyma01g41600	nearly identical (1109)AT2G35690| Symbols: ACX5 | ACX5 (ACYL-COA OXIDASE 5); acyl-CoA oxidase | chr2:15007041-15009971 FORWARDmoderately similar to ( 276)ACOX2_CUCMA no original description	-1.16862	0.823589
11772990	glyma01g41610	weakly similar to ( 161)AT3G13540| Symbols: ATM2, ATMYB5 | ATMYB5 (MYB DOMAIN PROTEIN 5); DNA binding / transcription factor | chr3:4420246-4421450 FORWARDweakly similar to ( 158)MYBC_MAIZE no original description	1.79041	0.107459
11772994	glyma01g41620	moderately similar to ( 281)AT4G16720| Symbols: | 60S ribosomal protein L15 (RPL15A) | chr4:9400178-9401337 REVERSEmoderately similar to ( 279)RL15_PETHY no original description	-1.42918	0.0806837
11773003	glyma01g41630	highly similar to ( 561)AT4G16700| Symbols: PSD1 | PSD1 (PHOSPHATIDYLSERINE DECARBOXYLASE 1); phosphatidylserine decarboxylase | chr4:9395837-9398283 REVERSE no original description	1.01256	0.930829
11773017	glyma01g41640	moderately similar to ( 285)AT4G17350| Symbols: | similar to unknown protein [Arabidopsis thaliana] (TAIR:AT5G47440.1); similar to hypothetical protein 31.t00035 [Brassica oleracea] (GB:ABD65121.1); contains InterPro domain Pleckstrin-like, plant (InterPro:IPR013666); contains InterPro domain Protein of unknown function DUF828, plant (InterPro:IPR008546); contains InterPro domain Pleckstrin-like …	3.35855	0.0971407
11773025	glyma01g41660	nearly identical (1623)AT1G09620| Symbols: | ATP binding / aminoacyl-tRNA ligase | chr1:3113079-3116457 REVERSE no original description	-1.1548	0.146152
11773030	glyma01g41680	highly similar to ( 542)AT5G47380| Symbols: | similar to unknown protein [Arabidopsis thaliana] (TAIR:AT5G66600.1); similar to unknown protein [Arabidopsis thaliana] (TAIR:AT5G66600.3); similar to hypothetical protein 24.t00022 [Brassica oleracea] (GB:ABD64944.1); contains InterPro domain Protein of unknown function DUF547 (InterPro:IPR006869) | chr5:19238699-19241698 REVERSE no original descript…	-1.27341	0.124194
11773043	glyma01g41720	no original description	1.1894	0.0507301
11773047	glyma01g41730	highly similar to ( 553)AT4G17330| Symbols: ATG2484-1 | ATG2484-1 (Arabidopsis thaliana G2484-1 protein); RNA binding | chr4:9689275-9693384 REVERSE no original description	1.13041	0.162442
11773061	glyma01g41750	moderately similar to ( 335)AT4G16640| Symbols: | matrix metalloproteinase, putative | chr4:9367418-9368512 REVERSEmoderately similar to ( 229)MEP1_SOYBN no original description	2.22683	0.137123
11773063	glyma01g41770	moderately similar to ( 350)AT5G47470| Symbols: | nodulin MtN21 family protein | chr5:19271825-19273605 FORWARD no original description	1.12261	0.707781
11773071	glyma01g41780	weakly similar to ( 114)AT2G45120| Symbols: | zinc finger (C2H2 type) family protein | chr2:18610755-18611699 FORWARD no original description	-1.00334	0.988057
11773074	glyma01g41790	nearly identical (1033)AT5G47490| Symbols: | similar to unknown protein [Arabidopsis thaliana] (TAIR:AT5G47480.1); similar to hypothetical protein 24.t00016 [Brassica oleracea] (GB:ABD64938.1); similar to hypothetical protein 24.t00015 [Brassica oleracea] (GB:ABD64937.1); similar to hypothetical protein 25.t00024 [Brassica oleracea] (GB:ABD64978.1); contains domain PTHR13402 (PTHR13402) | chr5:19…	1.20988	0.40602
11773092	glyma01g41800	nearly identical (1005)AT5G47490| Symbols: | similar to unknown protein [Arabidopsis thaliana] (TAIR:AT5G47480.1); similar to hypothetical protein 24.t00016 [Brassica oleracea] (GB:ABD64938.1); similar to hypothetical protein 24.t00015 [Brassica oleracea] (GB:ABD64937.1); similar to hypothetical protein 25.t00024 [Brassica oleracea] (GB:ABD64978.1); contains domain PTHR13402 (PTHR13402) | chr5:19…	-1.12068	0.148677
11773109	glyma01g41810	no original description	-1.16719	0.187561
11773113	glyma01g41850	highly similar to ( 607)AT2G35720| Symbols: | DNAJ heat shock N-terminal domain-containing protein | chr2:15023962-15026945 FORWARD no original description	-1.05076	0.828828
11773134	glyma01g41880	moderately similar to ( 391)AT5G47510| Symbols: | SEC14 cytosolic factor family protein / phosphoglyceride transfer family protein | chr5:19292275-19294226 FORWARD no original description	-1.24521	0.4747
11773148	glyma01g41900	weakly similar to ( 179)AT3G60600| Symbols: VAP, (AT)VAP, VAP27, VAP27-1 | VAP27-1 (VAMP/SYNAPTOBREVIN-ASSOCIATED PROTEIN 27-1) | chr3:22411512-22412644 FORWARD no original description	-1.01744	0.959111
11773154	glyma01g41910	weakly similar to ( 178)AT4G16520| Symbols: ATG8F | ATG8F (AUTOPHAGY 8F); microtubule binding | chr4:9306905-9308136 REVERSE no original description	2.76689	0.0369631
11773163	glyma01g41920	highly similar to ( 515)AT4G17260| Symbols: | L-lactate dehydrogenase, putative | chr4:9674070-9675322 FORWARDmoderately similar to ( 460)LDHA_HORVU no original description	1.18188	0.558322
11773168	glyma01g41930	highly similar to ( 622)AT1G12110| Symbols: CHL1-1, NRT1, B-1, ATNRT1, CHL1, NRT1.1 | NRT1.1 (NITRATE TRANSPORTER 1.1); transporter | chr1:4105339-4109288 FORWARD no original description	-1.10951	0.211588
11773178	glyma01g41960	moderately similar to ( 245)AT1G62520| Symbols: | similar to unknown protein [Arabidopsis thaliana] (TAIR:AT4G22560.1); similar to AT1G62520 [Arabidopsis lyrata subsp. petraea] (GB:AAT72492.1); contains domain ADP-ribosylation (SSF56399) | chr1:23148171-23149013 FORWARD no original description	1.06805	0.889147
11773182	glyma01g41990	highly similar to ( 818)AT1G12240| Symbols: ATBETAFRUCT4, VAC-INV | ATBETAFRUCT4/VAC-INV (VACUOLAR INVERTASE); beta-fructofuranosidase/ hydrolase, hydrolyzing O-glycosyl compounds | chr1:4153697-4157455 FORWARDhighly similar to ( 978)INVA_VICFA no original description	3.16211	0.0487475
11773191	glyma01g42000	weakly similar to ( 182)AT1G12250| Symbols: | thylakoid lumenal protein-related | chr1:4159621-4161267 FORWARD no original description	1.0467	0.926097
11773200	glyma01g42010	highly similar to ( 676)AT1G62740| Symbols: | stress-inducible protein, putative | chr1:23234691-23237045 FORWARDmoderately similar to ( 438)STIP_SOYBN no original description	1.39694	0.119552
11773211	glyma01g42050	moderately similar to ( 287)AT4G22680| Symbols: AtMYB85, MYB85 | MYB85 (myb domain protein 85); DNA binding / transcription factor | chr4:11922800-11924091 REVERSEmoderately similar to ( 299)ODO1_PETHY no original description	-1.3226	0.0786466
11773215	glyma01g42060	no original description	-1.31991	0.0388491
11773225	glyma01g42100	highly similar to ( 757)AT4G22730| Symbols: | leucine-rich repeat transmembrane protein kinase, putative | chr4:11941395-11943707 FORWARDmoderately similar to ( 201)RPK1_IPONI no original description	-2.83048	0.0100712
11773232	glyma01g42110	weakly similar to ( 123)AT5G60440| Symbols: | MADS-box protein (AGL62) | chr5:24323555-24324746 FORWARD no original description	1.10246	0.722979
11773235	glyma01g42130	moderately similar to ( 229)AT3G60780| Symbols: | similar to unknown protein [Arabidopsis thaliana] (TAIR:AT2G45360.1); similar to unnamed protein product [Vitis vinifera] (GB:CAO24498.1); contains InterPro domain Protein of unknown function DUF1442 (InterPro:IPR009902) | chr3:22473670-22474605 FORWARD no original description	1.10579	0.607638
11773240	glyma01g42140	highly similar to ( 805)AT1G12360| Symbols: KEU | KEU (KEULE); protein transporter | chr1:4201170-4206142 FORWARDhighly similar to ( 684)SEC1A_ORYSA no original description	1.402	0.393909
11773260	glyma01g42170	weakly similar to ( 119)AT4G22760| Symbols: | pentatricopeptide (PPR) repeat-containing protein | chr4:11958488-11962881 FORWARD no original description	2.7085	0.0171193
11773266	glyma01g42180	weakly similar to ( 101)AT2G27830| Symbols: | similar to pentatricopeptide (PPR) repeat-containing protein [Arabidopsis thaliana] (TAIR:AT4G22760.1); similar to hypothetical protein [Catharanthus roseus] (GB:CAC09928.1) | chr2:11867811-11868383 FORWARD no original description	1.80005	0.137329
11773271	glyma01g42190	weakly similar to ( 162)AT1G12390| Symbols: | cornichon family protein | chr1:4220345-4221479 FORWARD no original description	-1.20377	0.654225
11773276	glyma01g42210	moderately similar to ( 208)AT4G12060| Symbols: | Clp amino terminal domain-containing protein | chr4:7228263-7229892 REVERSE no original description	-1.19513	0.575005
11773283	glyma01g42230	moderately similar to ( 201)AT2G45430| Symbols: | DNA-binding protein-related | chr2:18734922-18735875 FORWARD no original description	1.14532	0.585361
11773287	glyma01g42270	moderately similar to ( 283)AT1G12450| Symbols: | similar to unknown protein [Arabidopsis thaliana] (TAIR:AT4G22850.1); similar to unnamed protein product [Vitis vinifera] (GB:CAO63604.1); contains InterPro domain SNARE associated Golgi protein (InterPro:IPR015414) | chr1:4244494-4245806 FORWARD no original description	2.37734	0.0265909
11773294	glyma01g42280	nearly identical (1086)AT1G12460| Symbols: | leucine-rich repeat transmembrane protein kinase, putative | chr1:4247701-4250442 FORWARDmoderately similar to ( 283)RPK1_IPONI no original description	1.79047	0.180789
11773298	glyma01g42300	moderately similar to ( 223)AT4G11990| Symbols: | similar to unknown protein [Arabidopsis thaliana] (TAIR:AT4G22860.1); similar to unnamed protein product [Vitis vinifera] (GB:CAO63610.1) | chr4:7186400-7189683 REVERSE no original description	-2.03415	0.0490319
11773312	glyma01g42310	highly similar to ( 511)AT3G14067| Symbols: | subtilase family protein | chr3:4658428-4660761 REVERSE no original description	-1.00604	0.949927
11773314	glyma01g42320	moderately similar to ( 455)AT1G04110| Symbols: SDD1 | SDD1 (STOMATAL DENSITY AND DISTRIBUTION); subtilase | chr1:1061456-1063783 REVERSE no original description	1.08798	0.819608
11773320	glyma01g42340	no original description	-1.43882	0.226287
11773332	glyma01g42360	moderately similar to ( 434)AT4G22890| Symbols: PGR5-LIKE A | PGR5-LIKE A | chr4:12007168-12009186 FORWARD no original description	-1.273	0.552172
11773347	glyma01g42370	moderately similar to ( 330)AT1G12560| Symbols: EXP7, ATEXP7, ATHEXP ALPHA 1.26, EXPA7, ATEXPA7 | ATEXPA7 (ARABIDOPSIS THALIANA EXPANSIN A7) | chr1:4276555-4277691 FORWARDmoderately similar to ( 321)EXP30_ORYSA no original description	1.02522	0.958154
11773352	glyma01g42380	highly similar to ( 601)AT4G11920| Symbols: | WD-40 repeat family protein | chr4:7160612-7163251 REVERSE no original description	-1.12773	0.344862
11773364	glyma01g42400	highly similar to ( 531)AT4G11860| Symbols: | similar to unknown protein [Arabidopsis thaliana] (TAIR:AT4G22960.1); similar to unnamed protein product [Vitis vinifera] (GB:CAO63644.1); contains InterPro domain Protein of unknown function DUF544 (InterPro:IPR007518); contains InterPro domain Ubiquitin interacting motif (InterPro:IPR003903) | chr4:7134231-7138355 REVERSE no original description	1.67475	0.143549
11773380	glyma01g42410	moderately similar to ( 439)AT1G62990| Symbols: IXR11, KNAT7 | KNAT7 (Knotted-like Arabidopsis thaliana); DNA binding / transcription factor | chr1:23341133-23344013 FORWARDmoderately similar to ( 428)HD1_BRANA no original description	-1.7166	0.126147
11773388	glyma01g42420	nearly identical (1246)AT2G42010| Symbols: PLDBETA, PLDBETA1 | PLDBETA1 (PHOSPHOLIPASE D BETA 1); phospholipase D | chr2:17540096-17545068 REVERSEhighly similar to ( 707)PLDA1_TOBAC no original description	-1.01909	0.964482
11773401	glyma01g42430	moderately similar to ( 405)AT4G00240| Symbols: PLDBETA2 | PLDBETA2 (phospholipase D beta 2) | chr4:106380-110718 REVERSEmoderately similar to ( 236)PLDA1_TOBAC no original description	-2.07618	0.02852
11773414	glyma01g42440	moderately similar to ( 279)AT1G63000| Symbols: UER1, NRS/ER | NRS/ER (NUCLEOTIDE-RHAMNOSE SYNTHASE/EPIMERASE-REDUCTASE) | chr1:23346175-23347524 FORWARD no original description	-1.73389	0.0253033
11773424	glyma01g42560	highly similar to ( 587)AT4G23030| Symbols: | MATE efflux protein-related | chr4:12072868-12074376 FORWARD no original description	1.02219	0.975985
11773428	glyma01g42580	highly similar to ( 753)AT1G12740| Symbols: CYP87A2 | CYP87A2 (cytochrome P450, family 87, subfamily A, polypeptide 2); oxygen binding | chr1:4342460-4344567 FORWARDhighly similar to ( 645)C87A3_ORYSA no original description	-1.17951	0.343345
11773438	glyma01g42610	moderately similar to ( 419)AT4G23050| Symbols: | protein kinase, putative | chr4:12080123-12083719 FORWARDweakly similar to ( 119)CRI4_MAIZE no original description	1.44207	0.235649
11773457	glyma01g42620	weakly similar to ( 135)AT4G23060| Symbols: IQD22 | IQD22 (IQ-domain 22); calmodulin binding | chr4:12087294-12090419 FORWARD no original description	1.35013	0.0732761
11773465	glyma01g42630	moderately similar to ( 395)AT1G12760| Symbols: | protein binding / zinc ion binding | chr1:4348939-4350510 FORWARD no original description	1.33349	0.0266811
11773473	glyma01g42660	moderately similar to ( 281)AT4G11650| Symbols: ATOSM34 | ATOSM34 (OSMOTIN 34) | chr4:7025121-7026107 REVERSEmoderately similar to ( 259)PRR1_TOBAC no original description	1.14212	0.737623
11773477	glyma01g42670	moderately similar to ( 321)AT4G11650| Symbols: ATOSM34 | ATOSM34 (OSMOTIN 34) | chr4:7025121-7026107 REVERSEmoderately similar to ( 300)PRR1_TOBAC no original description	-2.21163	0.111545
11773481	glyma01g42680	moderately similar to ( 291)AT4G20330| Symbols: | transcription initiation factor-related | chr4:10982694-10984050 REVERSE no original description	1.66335	0.101147
11773489	glyma01g42710	highly similar to ( 637)AT1G63300| Symbols: | similar to unknown protein [Arabidopsis thaliana] (TAIR:AT5G41140.1); similar to unnamed protein product [Vitis vinifera] (GB:CAO17243.1); contains domain PTHR23160 (PTHR23160) | chr1:23485858-23489732 FORWARD no original description	-1.88596	0.0453258
11773500	glyma01g42730	weakly similar to ( 162)AT5G30495| Symbols: | similar to unknown protein [Arabidopsis thaliana] (TAIR:AT1G54770.1); similar to unnamed protein product [Vitis vinifera] (GB:CAO70928.1); contains InterPro domain Fcf2 pre-rRNA processing (InterPro:IPR014810) | chr5:11397420-11398621 FORWARD no original description	1.29937	0.0169731
11773510	glyma01g42740	highly similar to ( 578)AT5G23850| Symbols: | similar to unknown protein [Arabidopsis thaliana] (TAIR:AT3G48980.1); similar to unnamed protein product [Vitis vinifera] (GB:CAO17250.1); contains InterPro domain Protein of unknown function DUF821, CAP10-like (InterPro:IPR008539); contains InterPro domain Lipopolysaccharide-modifying protein (InterPro:IPR006598) | chr5:8038129-8040744 FORWARD no ori…	2.41177	0.0343068
11773518	glyma01g42770	highly similar to ( 848)AT1G63430| Symbols: | leucine-rich repeat transmembrane protein kinase, putative | chr1:23526561-23530116 FORWARDweakly similar to ( 160)PSKR_DAUCA no original description	1.45532	0.0890227
11773535	glyma01g42790	nearly identical (1102)AT1G63440| Symbols: HMA5 | HMA5 (HEAVY METAL ATPASE 5); ATPase, coupled to transmembrane movement of ions, phosphorylative mechanism | chr1:23531320-23534774 FORWARD no original description	2.10411	0.0333622
11773542	glyma01g42800	nearly identical (1268)AT1G63440| Symbols: HMA5 | HMA5 (HEAVY METAL ATPASE 5); ATPase, coupled to transmembrane movement of ions, phosphorylative mechanism | chr1:23531320-23534774 FORWARDvery weakly similar to (92.4)ACA1_ORYSA no original description	1.38154	0.0972976
11773549	glyma01g42820	nearly identical (1355)AT4G11610| Symbols: | C2 domain-containing protein | chr4:7013950-7017840 REVERSE no original description	-1.35646	0.0444462
11773552	glyma01g42830	moderately similar to ( 429)AT5G41250| Symbols: | exostosin family protein | chr5:16518445-16520130 REVERSEmoderately similar to ( 232)KATAM_ORYSA no original description	-1.02846	0.956834
11773558	glyma01g42840	moderately similar to ( 294)AT4G11600| Symbols: PHGPX, LSC803, ATGPX6 | ATGPX6 (GLUTATHIONE PEROXIDASE 6); glutathione peroxidase | chr4:7010015-7011324 REVERSEmoderately similar to ( 287)GPX4_CITSI no original description	10.5906	0.0134671
11773574	glyma01g42900	highly similar to ( 535)AT4G23100| Symbols: GSH1, CAD2, PAD2, RML1 | RML1 (ROOT MERISTEMLESS 1) | chr4:12103790-12106762 REVERSEhighly similar to ( 543)GSH1_MEDTR no original description	3.50423	0.0944718
11773586	glyma01g42910	weakly similar to ( 123)AT5G41270| Symbols: | similar to Os01g0541600 [Oryza sativa (japonica cultivar-group)] (GB:NP_001043269.1); similar to hypothetical protein OsI_002270 [Oryza sativa (indica cultivar-group)] (GB:EAY74423.1); contains InterPro domain RNAse P, Rpr2/Rpp21 subunit (InterPro:IPR007175) | chr5:16525025-16526041 FORWARD no original description	-1.08982	0.141615
11773591	glyma01g42920	moderately similar to ( 394)AT4G11560| Symbols: | bromo-adjacent homology (BAH) domain-containing protein | chr4:7000089-7003439 REVERSE no original description	1.53309	0.0837282
11773604	glyma01g42930	moderately similar to ( 300)AT4G11450| Symbols: | similar to unknown protein [Arabidopsis thaliana] (TAIR:AT1G63520.1); similar to hypothetical protein [Vitis vinifera] (GB:CAN65660.1) | chr4:6959060-6961218 REVERSE no original description	-1.32377	0.0815608
11773610	glyma01g42940	highly similar to ( 806)AT1G63690| Symbols: | protease-associated (PA) domain-containing protein | chr1:23622153-23625745 FORWARD no original description	1.19044	0.535476
11773627	glyma01g42950	moderately similar to ( 492)AT4G00430| Symbols: PIP1;4, PIP1E, TMP-C | TMP-C (PLASMA MEMBRANE INTRINSIC PROTEIN 1;4); water channel | chr4:186143-187531 REVERSEmoderately similar to ( 482)PIP11_ORYSA no original description	-1.10452	0.559469
11773634	glyma01g42980	nearly identical (1135)AT4G23440| Symbols: | nucleoside-triphosphatase/ nucleotide binding / transmembrane receptor | chr4:12237775-12240669 FORWARD no original description	-1.42985	0.0541806
11773640	glyma01g43010	moderately similar to ( 315)AT4G23470| Symbols: | hydroxyproline-rich glycoprotein family protein | chr4:12249299-12251089 FORWARD no original description	2.25607	0.129244
11773648	glyma01g43040	moderately similar to ( 367)AT5G41410| Symbols: BEL1 | BEL1 (BELL 1); DNA binding / transcription factor | chr5:16597652-16600998 FORWARD no original description	-1.00894	0.960272
11773656	glyma01g43060	weakly similar to ( 160)AT5G41470| Symbols: | similar to nuclear transport factor 2 (NTF2) family protein [Arabidopsis thaliana] (TAIR:AT1G71480.1); similar to hypothetical protein OsI_013923 [Oryza sativa (indica cultivar-group)] (GB:EAY92690.1); contains domain NTF2-like (SSF54427) | chr5:16611181-16612647 FORWARD no original description	1.0118	0.976047
11773661	glyma01g43080	no original description	1.06108	0.748617
11773669	glyma01g43130	very weakly similar to (87.8)AT5G52830| Symbols: ATWRKY27, WRKY27 | WRKY27 (WRKY DNA-binding protein 27); transcription factor | chr5:21428222-21429444 FORWARD no original description	2.20365	0.0235629
11773673	glyma01g43150	moderately similar to ( 385)AT4G11260| Symbols: ATSGT1B, ETA3, RPR1, EDM1, SGT1B | SGT1B (enhanced downy mildew 1b); protein binding | chr4:6851511-6853715 REVERSE no original description	1.1362	0.201079
11773684	glyma01g43190	nearly identical (1439)AT1G64060| Symbols: ATRBOHF, RBOHAP108, RBOHF, ATRBOH F | ATRBOH F (RESPIRATORY BURST OXIDASE PROTEIN F); NAD(P)H oxidase | chr1:23773929-23779980 FORWARD no original description	-1.25264	0.280221
11773699	glyma01g43200	very weakly similar to (96.3)AT1G64065| Symbols: | similar to unknown protein [Arabidopsis thaliana] (TAIR:AT2G44000.1); similar to unnamed protein product [Vitis vinifera] (GB:CAO49537.1); contains InterPro domain Harpin-induced 1 (InterPro:IPR010847) | chr1:23782291-23782935 FORWARD no original description	-1.07435	0.671841
11773702	glyma01g43210	very weakly similar to (84.3)AT1G64065| Symbols: | similar to unknown protein [Arabidopsis thaliana] (TAIR:AT2G44000.1); similar to unnamed protein product [Vitis vinifera] (GB:CAO49537.1); contains InterPro domain Harpin-induced 1 (InterPro:IPR010847) | chr1:23782291-23782935 FORWARD no original description	1.16187	0.728381
11773704	glyma01g43250	moderately similar to ( 255)AT3G18440| Symbols: ATALMT9 | ATALMT9 (ALUMINUM-ACTIVATED MALATE TRANSPORTER 9); anion channel/ | chr3:6328187-6330658 FORWARD no original description	1.08594	0.905243
11773711	glyma01g43290	moderately similar to ( 412)AT5G41620| Symbols: | Identical to Uncharacterized protein At5g41620 [Arabidopsis Thaliana] (GB:Q66GQ2;GB:Q0WN78;GB:Q9FFR8); similar to intracellular protein transport protein USO1-related [Arabidopsis thaliana] (TAIR:AT1G64180.1); similar to unnamed protein product [Vitis vinifera] (GB:CAO65868.1) | chr5:16663558-16666004 FORWARD no original description	-1.12792	0.376075
11773716	glyma01g43300	weakly similar to ( 188)AT1G64185| Symbols: | lactoylglutathione lyase family protein / glyoxalase I family protein | chr1:23828190-23828815 FORWARD no original description	-1.12862	0.805107
11773722	glyma01g43320	weakly similar to ( 143)AT5G53340| Symbols: | galactosyltransferase family protein | chr5:21658271-21660421 REVERSE no original description	1.0851	0.889708
11773729	glyma01g43330	moderately similar to ( 442)AT4G23730| Symbols: | aldose 1-epimerase family protein | chr4:12362965-12364802 FORWARD no original description	1.07272	0.820134
11773737	glyma01g43340	moderately similar to ( 478)AT4G23740| Symbols: | leucine-rich repeat transmembrane protein kinase, putative | chr4:12367073-12369169 FORWARDweakly similar to ( 190)PSKR_DAUCA no original description	-1.04879	0.607218
11773742	glyma01g43350	weakly similar to ( 145)AT4G23750| Symbols: CRF2 | CRF2 (CYTOKININ RESPONSE FACTOR 2); DNA binding / transcription factor | chr4:12376761-12377792 FORWARDvery weakly similar to (90.5)ERF2_NICSY no original description	-1.29643	0.693824
11773747	glyma01g43370	nearly identical (1005)AT5G41770| Symbols: | crooked neck protein, putative / cell cycle protein, putative | chr5:16735249-16738164 FORWARD no original description	1.06408	0.836277
11773758	glyma01g43390	highly similar to ( 677)AT5G41800| Symbols: | amino acid transporter family protein | chr5:16751070-16753116 FORWARD no original description	-1.02637	0.921029
11773767	glyma01g43400	very weakly similar to (91.7)AT5G41810| Symbols: | similar to unknown protein [Arabidopsis thaliana] (TAIR:AT1G64340.1); similar to Avr9/Cf-9 rapidly elicited protein 194 [Nicotiana tabacum] (GB:AAG43553.1) | chr5:16755530-16756702 FORWARD no original description	-1.45766	0.0339451
11773771	glyma01g43410	moderately similar to ( 424)AT1G64350| Symbols: SEH1H | SEH1H; nucleotide binding | chr1:23885245-23886736 FORWARD no original description	-1.42588	0.292485
11773781	glyma01g43500	no original description	3.37786	0.0666334
11773785	glyma01g43540	moderately similar to ( 450)AT4G10960| Symbols: UGE5 | UGE5 (UDP-D-GLUCOSE/UDP-D-GALACTOSE 4-EPIMERASE 5); UDP-glucose 4-epimerase/ protein dimerization | chr4:6716079-6718468 REVERSEmoderately similar to ( 358)GALE1_PEA no original description	4.34394	0.043692
11773799	glyma01g43550	nearly identical (1063)AT5G42080| Symbols: ADL1A, AG68, DRP1A | ADL1 (ARABIDOPSIS DYNAMIN-LIKE PROTEIN); GTP binding | chr5:16838792-16841764 REVERSE no original description	1.01811	0.931091
11773817	glyma01g43560	moderately similar to ( 452)AT4G10955| Symbols: | lipase class 3 family protein | chr4:6713774-6715368 REVERSE no original description	-1.11045	0.662346
11773823	glyma01g43590	moderately similar to ( 478)AT4G10950| Symbols: | GDSL-motif lipase/hydrolase family protein | chr4:6711498-6713508 REVERSEweakly similar to ( 114)APG_BRANA no original description	1.30469	0.169327
11773829	glyma01g43610	highly similar to ( 807)AT4G15110| Symbols: CYP97B3 | CYP97B3 (cytochrome P450, family 97, subfamily B, polypeptide 3); oxygen binding | chr4:8629919-8632990 REVERSEhighly similar to ( 941)C97B2_SOYBN no original description	-1.02399	0.949991
11773844	glyma01g43620	highly similar to ( 547)AT1G50420| Symbols: SCL-3, SCL3 | SCL3 (SCARECROW-LIKE 3); transcription factor | chr1:18681845-18683293 REVERSEweakly similar to ( 174)CIGR2_ORYSA no original description	-1.65695	0.0340542
11773848	glyma01g43630	highly similar to ( 922)AT1G08520| Symbols: PDE166, CHLD | CHLD/PDE166 (PIGMENT DEFECTIVE 166); magnesium chelatase/ nucleoside-triphosphatase/ nucleotide binding | chr1:2696541-2700822 FORWARDhighly similar to ( 974)CHLD_PEA no original description	-1.5353	0.0441868
11773871	glyma01g43680	nearly identical (1410)AT4G23460| Symbols: | beta-adaptin, putative | chr4:12243909-12248908 REVERSE no original description	1.43899	0.0978482
11773889	glyma01g43720	moderately similar to ( 478)AT5G08280| Symbols: HEMC | HEMC (HYDROXYMETHYLBILANE SYNTHASE); hydroxymethylbilane synthase | chr5:2663764-2665597 REVERSEmoderately similar to ( 496)HEM3_PEA no original description	-2.27573	0.00853979
11773898	glyma01g43730	no original description	1.29973	0.457198
11773901	glyma01g43740	no original description	1.26266	0.477493
11773909	glyma01g43780	highly similar to ( 504)AT4G10020| Symbols: ATHSD5 | ATHSD5 (HYDROXYSTEROID DEHYDROGENASE 5); oxidoreductase | chr4:6268360-6270176 FORWARD no original description	1.08438	0.836762
11773918	glyma01g43790	highly similar to ( 750)AT4G20770| Symbols: | pentatricopeptide (PPR) repeat-containing protein | chr4:11130773-11132995 REVERSEweakly similar to ( 139)RF1_ORYSA no original description	-1.38803	0.538006
11773924	glyma01g43820	no original description	-1.12527	0.762563
11773928	glyma01g43830	no original description	-1.12956	0.740212
11773934	glyma01g43840	no original description	-1.32176	0.144497
11773944	glyma01g43860	highly similar to ( 587)AT3G16090| Symbols: | zinc finger (C3HC4-type RING finger) family protein | chr3:5456519-5458700 FORWARD no original description	1.14325	0.527274
11773954	glyma01g43880	highly similar to ( 681)AT5G13930| Symbols: CHS, TT4, ATCHS | ATCHS/CHS/TT4 (CHALCONE SYNTHASE); naringenin-chalcone synthase | chr5:4488764-4490037 FORWARDhighly similar to ( 813)CHS7_SOYBN no original description	2.21098	0.0460669
11773959	glyma01g43890	highly similar to ( 544)AT1G52640| Symbols: | pentatricopeptide (PPR) repeat-containing protein | chr1:19612525-19614096 REVERSEweakly similar to ( 163)RF1_ORYSA no original description	-1.07539	0.742317
11773963	glyma01g43900	nearly identical (1802)AT5G17020| Symbols: ATCRM1, ATXPO1, XPO1, XPO1A | XPO1A (exportin 1A); protein transporter | chr5:5594907-5602470 FORWARD no original description	-1.01874	0.940931
11773997	glyma01g43910	moderately similar to ( 337)AT3G03120| Symbols: ATARFB1C | ATARFB1C (ADP-ribosylation factor B1C); GTP binding | chr3:717352-718921 FORWARDmoderately similar to ( 226)ARF1_SOLTU no original description	1.62915	0.197063
11774008	glyma01g43930	weakly similar to ( 163)AT1G54130| Symbols: AT-RSH3, RSH3 | RSH3 (RELA/SPOT HOMOLOG 3); catalytic | chr1:20214845-20217429 FORWARD no original description	-1.22941	0.448494
11774018	glyma01g43940	very weakly similar to (94.7)AT3G14050| Symbols: AT-RSH2, RSH2 | RSH2 (RELA-SPOT HOMOLOG); catalytic | chr3:4650909-4653521 REVERSE no original description	-1.01291	0.959859
11774027	glyma01g43980	highly similar to ( 684)AT4G33270| Symbols: CDC20.1 | CDC20.1; signal transducer | chr4:16044549-16046594 REVERSE no original description	-1.16431	0.518137
11774035	glyma01g44000	moderately similar to ( 322)AT5G17170| Symbols: ENH1 | ENH1 (ENHANCER OF SOS3-1) | chr5:5649337-5650837 FORWARD no original description	-1.20953	0.350467
11774044	glyma01g44010	highly similar to ( 647)AT1G33250| Symbols: | fringe-related protein | chr1:12057504-12059326 REVERSE no original description	-1.21668	0.396602
11774051	glyma01g44040	no original description	-1.02059	0.947828
11774056	glyma01g44060	moderately similar to ( 218)AT2G40935| Symbols: | similar to unknown protein [Arabidopsis thaliana] (TAIR:AT3G18470.1); similar to hypothetical protein [Vitis vinifera] (GB:CAN70759.1); contains InterPro domain Protein of unknown function Cys-rich (InterPro:IPR006461) | chr2:17090277-17091294 FORWARD no original description	1.92815	0.206521
11774061	glyma01g44110	moderately similar to ( 299)AT4G10050| Symbols: | hydrolase, alpha/beta fold family protein | chr4:6284617-6287183 REVERSE no original description	1.14532	0.56864
11774069	glyma01g44120	moderately similar to ( 201)AT4G10040| Symbols: CYTC-2 | CYTC-2 (CYTOCHROME C-2); electron carrier | chr4:6277080-6278278 FORWARDweakly similar to ( 199)CYC_PHAAU no original description	1.65729	0.0961068
11774075	glyma01g44140	weakly similar to ( 172)AT1G71450| Symbols: | AP2 domain-containing transcription factor, putative | chr1:26930750-26931301 FORWARDvery weakly similar to (83.6)ERF4_NICSY no original description	9.32356	0.0217695
11774077	glyma01g44150	moderately similar to ( 208)AT1G71480| Symbols: | nuclear transport factor 2 (NTF2) family protein | chr1:26935741-26936748 FORWARD no original description	1.04661	0.929998
11774085	glyma01g44160	moderately similar to ( 259)AT4G25340| Symbols: | immunophilin-related / FKBP-type peptidyl-prolyl cis-trans isomerase-related | chr4:12959667-12962642 REVERSE no original description	-1.15315	0.349064
11774097	glyma01g44190	moderately similar to ( 472)AT4G10030| Symbols: | hydrolase, alpha/beta fold family protein | chr4:6270487-6273095 REVERSE no original description	-1.63296	0.0655405
11774113	glyma01g44200	highly similar to ( 570)AT4G10180| Symbols: FUS2, DET1 | DET1 (DE-ETIOLATED 1); catalytic | chr4:6346539-6349142 FORWARD no original description	-1.71677	0.0470273
11774128	glyma01g44220	moderately similar to ( 317)AT1G71500| Symbols: | Rieske (2Fe-2S) domain-containing protein | chr1:26939746-26940993 FORWARD no original description	-1.19604	0.251459
11774134	glyma01g44230	weakly similar to ( 121)AT1G22810| Symbols: | AP2 domain-containing transcription factor, putative | chr1:8074524-8074958 REVERSE no original description	1.65679	0.264956
11774137	glyma01g44310	highly similar to ( 777)AT3G22790| Symbols: | kinase interacting family protein | chr3:8052453-8057895 REVERSE no original description	1.03974	0.912399
11774147	glyma01g44340	moderately similar to ( 308)AT5G16810| Symbols: | ATP binding / protein kinase | chr5:5526863-5529881 REVERSE no original description	1.00643	0.988933
11774155	glyma01g44350	moderately similar to ( 335)AT5G16800| Symbols: | GCN5-related N-acetyltransferase (GNAT) family protein | chr5:5524723-5526298 REVERSE no original description	1.12556	0.800127
11774166	glyma01g44360	nearly identical (1811)AT5G42390| Symbols: | metalloendopeptidase | chr5:16962536-16969875 FORWARD no original description	1.10078	0.675649
11774194	glyma01g44370	moderately similar to ( 209)AT1G34670| Symbols: AtMYB93 | AtMYB93 (myb domain protein 93); DNA binding / transcription factor | chr1:12709106-12710401 FORWARDweakly similar to ( 184)ODO1_PETHY no original description	1.65554	0.150184
11774201	glyma01g44440	highly similar to ( 873)AT5G13270| Symbols: | pentatricopeptide (PPR) repeat-containing protein | chr5:4246957-4249215 REVERSEweakly similar to ( 127)RF1_ORYSA no original description	-1.61109	0.0333566
11774203	glyma01g44480	moderately similar to ( 449)AT1G64980| Symbols: | similar to unnamed protein product [Vitis vinifera] (GB:CAO62125.1); contains domain SSF53448 (SSF53448) | chr1:24141503-24142282 REVERSE no original description	-1.01833	0.975905
11774209	glyma01g44510	weakly similar to ( 104)AT3G04620| Symbols: | nucleic acid binding | chr3:1255666-1256745 REVERSE no original description	1.62107	0.12744
11774221	glyma01g44540	very weakly similar to (95.5)AT3G22620| Symbols: | protease inhibitor/seed storage/lipid transfer protein (LTP) family protein | chr3:8008622-8009422 FORWARD no original description	1.51518	0.544597
11774227	glyma01g44550	no original description	1.23407	0.560072
11774231	glyma01g44610	highly similar to ( 582)AT4G14790| Symbols: EDA15, ATSUV3 | ATSUV3 (embryo sac development arrest 15) | chr4:8496346-8499824 REVERSE no original description	-1.29245	0.211704
11774249	glyma01g44630	weakly similar to ( 184)AT3G22680| Symbols: | Identical to Uncharacterized protein At3g22680 [Arabidopsis Thaliana] (GB:Q9LUJ3;GB:Q84MD0); similar to unnamed protein product [Vitis vinifera] (GB:CAO71208.1); similar to Os06g0630300 [Oryza sativa (japonica cultivar-group)] (GB:NP_001058122.1); contains InterPro domain Protein of unknown function DUF1950 (InterPro:IPR015270) | chr3:8019792-8020381 …	1.00828	0.981936
11774255	glyma01g44660	very weakly similar to (98.6)AT1G63060| Symbols: | similar to unknown protein [Arabidopsis thaliana] (TAIR:AT5G07330.1); similar to unknown [Xerophyta humilis] (GB:AAT45004.1) | chr1:23387770-23388552 FORWARD no original description	3.05659	0.173554
11774259	glyma01g44670	moderately similar to ( 305)AT3G22780| Symbols: TSO1 | TSO1 (CHINESE FOR 'UGLY'); transcription factor | chr3:8048934-8052065 FORWARD no original description	1.26238	0.32688
11774273	glyma01g44680	highly similar to ( 881)AT3G22790| Symbols: | kinase interacting family protein | chr3:8052453-8057895 REVERSE no original description	-1.00609	0.982578
11774278	glyma01g44690	weakly similar to ( 157)AT2G32020| Symbols: | GCN5-related N-acetyltransferase (GNAT) family protein | chr2:13638270-13638821 REVERSE no original description	1.25178	0.481861
11774284	glyma01g44720	weakly similar to ( 194)AT3G22560| Symbols: | GCN5-related N-acetyltransferase (GNAT) family protein | chr3:7998922-7999449 REVERSE no original description	1.09858	0.744688
11774286	glyma01g44730	weakly similar to ( 137)AT3G22550| Symbols: | senescence-associated protein-related | chr3:7991834-7992812 REVERSE no original description	-6.08932	0.0122141
11774295	glyma01g44750	weakly similar to ( 122)AT3G22540| Symbols: | similar to unknown protein [Arabidopsis thaliana] (TAIR:AT4G14819.1); similar to unnamed protein product [Vitis vinifera] (GB:CAO71190.1); contains InterPro domain Protein of unknown function DUF1677, plant (InterPro:IPR012876) | chr3:7984240-7984572 REVERSE no original description	1.31006	0.574043
11774298	glyma01g44770	very weakly similar to (81.3)AT1G05430| Symbols: | similar to unnamed protein product [Vitis vinifera] (GB:CAO71187.1) | chr1:1594226-1595730 REVERSE no original description	-1.06732	0.78895
11774311	glyma01g44780	weakly similar to ( 127)AT4G14830| Symbols: | similar to unknown protein [Arabidopsis thaliana] (TAIR:AT3G22530.1); similar to unnamed protein product [Vitis vinifera] (GB:CAO71186.1); contains InterPro domain HSP20-like chaperone (InterPro:IPR008978) | chr4:8510978-8511436 FORWARD no original description	1.06882	0.816958
11774314	glyma01g44820	no original description	-2.00185	0.022963
11774321	glyma01g44850	weakly similar to ( 175)AT4G14890| Symbols: | ferredoxin family protein | chr4:8520882-8521346 FORWARDvery weakly similar to (85.1)FER2_RAPSA no original description	-2.45592	0.0252931
11774325	glyma01g44900	moderately similar to ( 337)AT4G14930| Symbols: | acid phosphatase survival protein SurE, putative | chr4:8538827-8541201 FORWARD no original description	1.15404	0.255898
11774339	glyma01g44920	highly similar to ( 521)AT4G14950| Symbols: | similar to unknown protein [Arabidopsis thaliana] (TAIR:AT1G05360.1); similar to unnamed protein product [Vitis vinifera] (GB:CAO71145.1); contains domain PTHR10281:SF1 (PTHR10281:SF1); contains domain PTHR10281 (PTHR10281) | chr4:8545513-8547718 FORWARD no original description	1.2413	0.109001
11774350	glyma01g44930	highly similar to ( 820)AT5G26340| Symbols: STP13, MSS1 | MSS1 (SUGAR TRANSPORT PROTEIN 13); carbohydrate transmembrane transporter/ hexose:hydrogen symporter/ high-affinity hydrogen:glucose symporter/ sugar:hydrogen ion symporter | chr5:9243854-9246997 REVERSEhighly similar to ( 540)STC_RICCO no original description	10.7404	0.00815539
11774358	glyma01g44940	weakly similar to ( 168)AT5G26330| Symbols: | plastocyanin-like domain-containing protein / mavicyanin, putative | chr5:9241617-9242638 REVERSEvery weakly similar to (99.8)BCP_PEA no original description	1.31576	0.31249
11774363	glyma01g44960	very weakly similar to (81.3)AT3G54200| Symbols: | similar to unknown protein [Arabidopsis thaliana] (TAIR:AT3G05975.1); similar to Harpin-induced 1 [Medicago truncatula] (GB:ABE93043.1); contains InterPro domain Harpin-induced 1 (InterPro:IPR010847) | chr3:20076709-20077416 FORWARD no original description	1.0439	0.859582
11774365	glyma01g44970	nearly identical (1027)AT5G19330| Symbols: | armadillo/beta-catenin repeat family protein / BTB/POZ domain-containing protein | chr5:6508302-6512703 REVERSE no original description	1.34907	0.100108
11774387	glyma01g45000	moderately similar to ( 243)AT1G47480| Symbols: | hydrolase | chr1:17420063-17421736 FORWARDweakly similar to ( 120)GID1_ORYSA no original description	1.41903	0.0309794
11774391	glyma01g45010	no original description	1.29382	0.469879
11774399	glyma01g45020	moderately similar to ( 247)AT1G47480| Symbols: | hydrolase | chr1:17420063-17421736 FORWARDvery weakly similar to (99.8)GID1_ORYSA no original description	-1.27601	0.349645
11774403	glyma01g45040	very weakly similar to (90.5)AT5G19260| Symbols: | similar to unknown protein [Arabidopsis thaliana] (TAIR:AT3G06020.1); similar to hypothetical protein [Vitis vinifera] (GB:CAN75990.1) | chr5:6479496-6480362 REVERSE no original description	-1.2054	0.377243
11774409	glyma01g45140	no original description	1.00164	0.99489
11774412	glyma01g45160	moderately similar to ( 488)AT4G23180| Symbols: RLK4, CRK10 | CRK10 (CYSTEINE-RICH RLK10); kinase | chr4:12138182-12140791 FORWARDmoderately similar to ( 206)NORK_PEA no original description	1.73772	0.128111
11774422	glyma01g45170	moderately similar to ( 322)AT4G05200| Symbols: | protein kinase family protein | chr4:2679791-2682307 REVERSEvery weakly similar to (94.4)NORK_PEA no original description	1.51743	0.061668
11774448	glyma01g45220	nearly identical (3964)AT1G50030| Symbols: TOR | TOR (TARGET OF RAPAMYCIN) | chr1:18526294-18543287 REVERSEweakly similar to ( 181)ATR_ORYSA no original description	-1.26116	0.207563
11774506	glyma01g45250	weakly similar to ( 187)AT2G14660| Symbols: | similar to hypothetical protein [Vitis vinifera] (GB:CAN83372.1); contains InterPro domain Protein of unknown function DUF55 (InterPro:IPR002740) | chr2:6279588-6280064 FORWARD no original description	-1.0208	0.932796
11774509	glyma01g45260	no original description	2.8562	0.0162253
11774513	glyma01g45270	weakly similar to ( 149)AT5G62300| Symbols: | 40S ribosomal protein S20 (RPS20C) | chr5:25038614-25039461 REVERSEweakly similar to ( 141)RS20_ORYSA no original description	-1.5204	0.225023
11774516	glyma01g45280	no original description	-1.10068	0.838298
11774520	glyma01g45290	moderately similar to ( 457)AT3G19640| Symbols: | magnesium transporter CorA-like family protein (MRS2-3) | chr3:6820975-6823110 FORWARD no original description	1.98204	0.0258826
11774528	glyma01g45320	no original description	1.13523	0.528334
11774534	glyma01g45330	highly similar to ( 513)AT2G14680| Symbols: MEE13 | MEE13 (maternal effect embryo arrest 13) | chr2:6285338-6290848 FORWARD no original description	-1.17744	0.473635
11774553	glyma01g45340	highly similar to ( 607)AT1G49980| Symbols: | similar to REV1 (Reversionless 1), damaged DNA binding / magnesium ion binding / nucleotidyltransferase [Arabidopsis thaliana] (TAIR:AT5G44750.2); similar to REV1 (Reversionless 1), damaged DNA binding / magnesium ion binding / nucleotidyltransferase [Arabidopsis thaliana] (TAIR:AT5G44750.1); similar to hypothetical protein OsJ_011272 [Oryza sativa (j…	-1.20724	0.24162
11774569	glyma01g45350	no original description	-1.44441	0.204627
11774578	glyma01g45380	nearly identical (1102)AT2G14740| Symbols: | vacuolar sorting receptor, putative | chr2:6315977-6319385 FORWARDnearly identical (1155)VSR1_PEA no original description	-1.76334	0.0519393
11774592	glyma01g45400	no original description	1.56373	0.0739317
11774598	glyma01g45410	highly similar to ( 568)AT3G19553| Symbols: | amino acid permease family protein | chr3:6790994-6792513 REVERSE no original description	-1.32185	0.144788
11774603	glyma01g45440	no original description	-1.03989	0.925281
11774613	glyma01g45490	nearly identical (1015)AT5G44750| Symbols: REV1 | REV1 (Reversionless 1); damaged DNA binding / magnesium ion binding / nucleotidyltransferase | chr5:18069896-18076808 FORWARD no original description	1.0553	0.653997
11774643	glyma01g45510	weakly similar to ( 162)AT2G15220| Symbols: | secretory protein, putative | chr2:6615771-6616448 FORWARD no original description	-1.07736	0.80505
11774647	glyma01g45530	moderately similar to ( 385)AT3G19440| Symbols: | pseudouridine synthase family protein | chr3:6740784-6743138 FORWARD no original description	-1.76192	0.025489
11774658	glyma01g45540	highly similar to ( 625)AT3G43610| Symbols: | tubulin binding | chr3:15528760-15534915 REVERSE no original description	1.35453	0.0543526
11774681	glyma01g45570	moderately similar to ( 333)AT3G19320| Symbols: | leucine-rich repeat family protein | chr3:6696401-6698079 REVERSEweakly similar to ( 115)RPK1_IPONI no original description	-1.23162	0.587754
11774684	glyma01g45590	highly similar to ( 803)AT3G19210| Symbols: ATRAD54, CHR25 | ATRAD54/CHR25 (ARABIDOPSIS HOMOLOG OF RAD54); ATP binding / DNA binding / helicase | chr3:6652805-6658882 REVERSEweakly similar to ( 112)ISW2_ORYSA no original description	1.29193	0.493529
11774699	glyma01g45630	moderately similar to ( 422)AT3G19210| Symbols: ATRAD54, CHR25 | ATRAD54/CHR25 (ARABIDOPSIS HOMOLOG OF RAD54); ATP binding / DNA binding / helicase | chr3:6652805-6658882 REVERSEweakly similar to ( 104)ISW2_ORYSA no original description	1.19082	0.189695
11774710	glyma01g45670	nearly identical (1142)AT1G76630| Symbols: | tetratricopeptide repeat (TPR)-containing protein | chr1:28764593-28769680 FORWARD no original description	1.27951	0.0271004
11774738	glyma01g00270	weakly similar to ( 118)AT1G68890| Symbols: | 2-oxoglutarate decarboxylase/ hydro-lyase/ magnesium ion binding / thiamin pyrophosphate binding | chr1:25900651-25910216 FORWARD no original description	-1.91108	0.0646639
11774761	glyma01g00300	highly similar to ( 652)AT4G38170| Symbols: FRS9 | FRS9 (FAR1-related sequence 9); zinc ion binding | chr4:17904607-17906433 FORWARD no original description	-1.19316	0.279102
11774781	glyma01g00420	highly similar to ( 548)AT2G07170| Symbols: | binding | chr2:2975562-2978689 FORWARD no original description	1.29155	0.0789782
11774789	glyma01g00430	nearly identical (1321)AT2G07050| Symbols: CAS1 | CAS1 (CYCLOARTENOL SYNTHASE 1); cycloartenol synthase | chr2:2924626-2930292 FORWARD no original description	-1.49246	0.0545989
11774811	glyma01g00460	nearly identical (1347)AT4G04940| Symbols: | transducin family protein / WD-40 repeat family protein | chr4:2511210-2517050 REVERSE no original description	-1.43049	0.0335649
11774831	glyma01g00510	highly similar to ( 582)AT1G19220| Symbols: IAA22, ARF11, ARF19 | ARF19 (AUXIN RESPONSE FACTOR 11); transcription factor | chr1:6628386-6632770 REVERSE no original description	-2.35619	0.0716284
11774848	glyma01g00520	moderately similar to ( 250)AT5G35330| Symbols: MBD2, MBD02 | MBD02 (methyl-CpG-binding domain 2); DNA binding | chr5:13540955-13542500 REVERSE no original description	-1.24106	0.269488
11774856	glyma01g00550	weakly similar to ( 108)AT4G20010| Symbols: PTAC9, OSB2 | OSB2/PTAC9 (PLASTID TRANSCRIPTIONALLY ACTIVE9); single-stranded DNA binding | chr4:10842138-10843999 FORWARD no original description	-1.14958	0.605649
11774864	glyma01g00600	weakly similar to ( 157)AT5G56840| Symbols: | DNA-binding family protein | chr5:22998015-22999378 FORWARD no original description	-1.46636	0.133033
11774870	glyma01g00620	moderately similar to ( 318)AT4G29540| Symbols: | bacterial transferase hexapeptide repeat-containing protein | chr4:14497781-14499771 FORWARD no original description	1.29047	0.35932
11774879	glyma01g00650	moderately similar to ( 285)AT4G26180| Symbols: | mitochondrial substrate carrier family protein | chr4:13260272-13261896 REVERSE no original description	1.06506	0.876035
11774890	glyma01g00670	weakly similar to ( 122)AT5G11780| Symbols: | similar to hypothetical protein [Vitis vinifera] (GB:CAN67286.1) | chr5:3793929-3795984 FORWARD no original description	-1.5417	0.0978876
11774898	glyma01g00690	highly similar to ( 556)AT4G29510| Symbols: ATPRMT11, PRMT11 | ATPRMT11/PRMT11 (ARABIDOPSIS ARGININE METHYLTRANSFERASE 11); protein-arginine N-methyltransferase | chr4:14491745-14493758 FORWARD no original description	-1.57554	0.0692226
11774909	glyma01g00750	highly similar to ( 528)AT3G14330| Symbols: | pentatricopeptide (PPR) repeat-containing protein | chr3:4779695-4782458 REVERSE no original description	-1.13781	0.82676
11774916	glyma01g00770	no original description	1.92118	0.0220904
11774919	glyma01g00780	moderately similar to ( 275)AT4G29170| Symbols: ATMND1 | ATMND1 | chr4:14383600-14385134 FORWARD no original description	-1.03381	0.749949
11774931	glyma01g00810	weakly similar to ( 166)AT3G49690| Symbols: RAX3, MYB84, ATMYB84 | ATMYB84/MYB84/RAX3 (myb domain protein 84); DNA binding / transcription factor | chr3:18438926-18440085 FORWARDweakly similar to ( 122)MYB4_ORYSA no original description	-1.04861	0.937817
11774935	glyma01g00820	moderately similar to ( 366)AT2G19810| Symbols: | zinc finger (CCCH-type) family protein | chr2:8557501-8558580 FORWARD no original description	1.42036	0.0317369
11774939	glyma01g00830	moderately similar to ( 224)AT1G64255| Symbols: | SWIM zinc finger family protein | chr1:23848617-23850869 FORWARD no original description	-1.12248	0.776446
11774943	glyma01g00860	weakly similar to ( 147)AT2G19790| Symbols: | clathrin adaptor complex small chain family protein | chr2:8534384-8535477 FORWARD no original description	1.54203	0.157148
11774954	glyma01g00870	highly similar to ( 609)AT4G26270| Symbols: | phosphofructokinase family protein | chr4:13301103-13304039 REVERSE no original description	-1.23238	0.402692
11774972	glyma01g00900	weakly similar to ( 122)AT4G29260| Symbols: | acid phosphatase class B family protein | chr4:14422316-14423415 REVERSEvery weakly similar to (88.6)VSPA_SOYBN no original description	-1.1635	0.640101
11774978	glyma01g00910	moderately similar to ( 486)AT4G29310| Symbols: | similar to unknown protein [Arabidopsis thaliana] (TAIR:AT1G10020.1); similar to unnamed protein product [Vitis vinifera] (GB:CAO65427.1); contains InterPro domain Protein of unknown function DUF1005 (InterPro:IPR010410) | chr4:14437898-14439615 REVERSE no original description	-1.01182	0.954668
11774981	glyma01g00940	highly similar to ( 928)AT4G26300| Symbols: EMB1027 | EMB1027 (EMBRYO DEFECTIVE 1027); ATP binding / arginine-tRNA ligase | chr4:13308409-13313118 REVERSE no original description	-1.57273	0.0271004
11775001	glyma01g01000	highly similar to ( 759)AT5G19740| Symbols: | peptidase M28 family protein | chr5:6673988-6676769 FORWARD no original description	-1.16668	0.520377
11775017	glyma01g01030	moderately similar to ( 215)AT3G16490| Symbols: IQD26 | IQD26 (IQ-domain 26); calmodulin binding | chr3:5603968-5605495 REVERSE no original description	-1.05206	0.90678
11775022	glyma01g01050	moderately similar to ( 403)AT4G29140| Symbols: | MATE efflux protein-related | chr4:14369154-14370752 FORWARD no original description	1.21662	0.520019
11775024	glyma01g01080	highly similar to ( 884)AT5G25930| Symbols: | leucine-rich repeat family protein / protein kinase family protein | chr5:9050883-9053981 FORWARDmoderately similar to ( 366)RPK1_IPONI no original description	-2.46299	0.0222464
11775028	glyma01g01090	highly similar to ( 855)AT5G25930| Symbols: | leucine-rich repeat family protein / protein kinase family protein | chr5:9050883-9053981 FORWARDmoderately similar to ( 357)RPK1_IPONI no original description	3.0371	0.147333
11775034	glyma01g01110	moderately similar to ( 234)AT2G37410| Symbols: TIM17, ATTIM17-2 | ATTIM17-2 (Arabidopsis thaliana translocase inner membrane subunit 17-2); P-P-bond-hydrolysis-driven protein transmembrane transporter | chr2:15705198-15705929 REVERSE no original description	1.2116	0.0157872
11775038	glyma01g01140	weakly similar to ( 140)AT1G60660| Symbols: B5 #5 | B5 #5 (cytochrome b5 family protein #5); heme binding / transition metal ion binding | chr1:22346254-22346619 REVERSE no original description	-1.62244	0.0467966
11775048	glyma01g01180	highly similar to ( 932)AT1G79750| Symbols: ATNADP-ME4 | ATNADP-ME4 (NADP-MALIC ENZYME 4); malate dehydrogenase (oxaloacetate-decarboxylating) (NADP+)/ malic enzyme/ oxidoreductase, acting on NADH or NADPH, NAD or NADP as acceptor | chr1:30012548-30016072 REVERSEnearly identical (1004)MAOX_VITVI no original description	-2.13793	0.0322121
11775072	glyma01g01190	highly similar to ( 577)AT1G77180| Symbols: | chromatin protein family | chr1:29004685-29006526 REVERSE no original description	1.39169	0.108807
11775075	glyma01g01210	highly similar to ( 728)AT2G19930| Symbols: | RNA-dependent RNA polymerase family protein | chr2:8614615-8619523 REVERSE no original description	1.16962	0.675224
11775093	glyma01g01230	moderately similar to ( 480)AT2G19950| Symbols: GC1 | This gene is predicted to encode a protein that functions as a Golgi apparatus structural component known as a golgin in mammals and yeast. A fluorescently-tagged version of GC1 co-localizes with Golgi markers, and this localization appears to be replicated using the C-terminal (558-715 aa) portion of the protein. | chr2:8623422-8628300 REVERS…	1.28077	0.225133
11775118	glyma01g01240	weakly similar to ( 102)AT1G52140| Symbols: | similar to unknown protein [Arabidopsis thaliana] (TAIR:AT3G16330.1); similar to hypothetical protein [Vitis vinifera] (GB:CAN64915.1) | chr1:19411228-19411854 REVERSE no original description	1.1245	0.697628
11775121	glyma01g01280	nearly identical (1101)AT2G20010| Symbols: | similar to unknown protein [Arabidopsis thaliana] (TAIR:AT2G25800.1); similar to unnamed protein product [Vitis vinifera] (GB:CAO65466.1); similar to unnamed protein product [Vitis vinifera] (GB:CAO44019.1); similar to unknown protein [Oryza sativa (japonica cultivar-group)] (GB:BAD28473.1); contains InterPro domain Munc13 homology 2 (InterPro:IPR01477…	1.00412	0.985238
11775130	glyma01g01300	moderately similar to ( 213)AT5G45580| Symbols: | transcription factor | chr5:18498319-18499825 REVERSE no original description	-1.42336	0.16462
11775141	glyma01g01340	highly similar to ( 549)AT1G32080| Symbols: | membrane protein, putative | chr1:11537552-11539736 REVERSE no original description	1.52237	0.162125
11775151	glyma01g01350	highly similar to ( 630)AT4G19010| Symbols: | 4-coumarate--CoA ligase family protein / 4-coumaroyl-CoA synthase family protein | chr4:10411726-10414232 REVERSEmoderately similar to ( 333)4CL1_TOBAC no original description	-2.77439	0.0206072
11775159	glyma01g01360	highly similar to ( 981)AT1G32090| Symbols: | early-responsive to dehydration protein-related / ERD protein-related | chr1:11540224-11544021 REVERSE no original description	-5.43769	0.00965739
11775173	glyma01g01370	highly similar to ( 687)AT1G32060| Symbols: PRK | PRK (PHOSPHORIBULOKINASE); ATP binding / phosphoribulokinase/ protein binding | chr1:11532648-11534386 FORWARDhighly similar to ( 701)KPPR_MESCR no original description	-2.76801	0.0122141
11775181	glyma01g01380	moderately similar to ( 392)AT1G32050| Symbols: | secretory carrier membrane protein (SCAMP) family protein | chr1:11528596-11530954 FORWARD no original description	1.64118	0.0616458
11775198	glyma01g01430	moderately similar to ( 227)AT5G45610| Symbols: | binding | chr5:18513624-18516900 REVERSE no original description	-1.08848	0.805706
11775205	glyma01g01450	no original description	-1.83777	0.219046
11775208	glyma01g01470	nearly identical (1145)AT1G31930| Symbols: XLG3 | XLG3 (EXTRA-LARGE GTP-BINDING PROTEIN 3); signal transducer | chr1:11465812-11468941 FORWARDweakly similar to ( 189)GPA2_SOYBN no original description	-1.32559	0.140133
11775220	glyma01g01500	moderately similar to ( 245)AT4G16070| Symbols: | lipase class 3 family protein | chr4:9096820-9100608 REVERSE no original description	-1.14248	0.0550142
11775231	glyma01g01510	moderately similar to ( 203)AT4G16070| Symbols: | lipase class 3 family protein | chr4:9096820-9100608 REVERSE no original description	3.42826	0.106908
11775247	glyma01g01550	moderately similar to ( 275)AT3G18670| Symbols: | ankyrin repeat family protein | chr3:6424141-6426477 REVERSE no original description	1.05222	0.905846
11775258	glyma01g01570	moderately similar to ( 294)AT4G16070| Symbols: | lipase class 3 family protein | chr4:9096820-9100608 REVERSE no original description	1.00602	0.984452
11775268	glyma01g01580	moderately similar to ( 230)AT4G16070| Symbols: | lipase class 3 family protein | chr4:9096820-9100608 REVERSE no original description	1.04949	0.889134
11775278	glyma01g01590	weakly similar to ( 192)AT1G68310| Symbols: | Identical to UPF0195 protein At1g68310 [Arabidopsis Thaliana] (GB:Q9C9G6); similar to unknown protein [Arabidopsis thaliana] (TAIR:AT3G50845.1); similar to predicted protein [Physcomitrella patens subsp. patens] (GB:EDQ68557.1); similar to hypothetical protein [Vitis vinifera] (GB:CAN82886.1); similar to Os04g0595200 [Oryza sativa (japonica cultivar-g…	1.53093	0.0466345
11775295	glyma01g01680	weakly similar to ( 178)AT3G14470| Symbols: | disease resistance protein (NBS-LRR class), putative | chr3:4857947-4861111 FORWARD no original description	-1.01613	0.973268
11775302	glyma01g01690	moderately similar to ( 265)AT4G16070| Symbols: | lipase class 3 family protein | chr4:9096820-9100608 REVERSE no original description	1.09339	0.796329
11775318	glyma01g01730	moderately similar to ( 449)AT4G23180| Symbols: RLK4, CRK10 | CRK10 (CYSTEINE-RICH RLK10); kinase | chr4:12138182-12140791 FORWARDmoderately similar to ( 203)NORK_PEA no original description	-1.4332	0.0283411
11775327	glyma01g01740	moderately similar to ( 328)AT2G35530| Symbols: | bZIP transcription factor family protein | chr2:14930359-14933104 REVERSEweakly similar to ( 152)HBP1A_WHEAT no original description	1.06975	0.510586
11775349	glyma01g01780	nearly identical (1656)AT3G03050| Symbols: KJK, ATCSLD3, CSLD3 | CSLD3 (CELLULOSE SYNTHASE-LIKE 3); cellulose synthase/ transferase, transferring glycosyl groups | chr3:687880-691636 FORWARD no original description	-1.03539	0.940766
11775357	glyma01g01790	moderately similar to ( 285)AT1G32190| Symbols: | similar to unknown protein [Arabidopsis thaliana] (TAIR:AT2G24320.1); similar to unnamed protein product [Vitis vinifera] (GB:CAO63335.1); contains domain PTHR12277:SF8 (PTHR12277:SF8); contains domain PTHR12277 (PTHR12277); contains domain SSF53474 (SSF53474); contains domain G3DSA:3.40.50.1820 (G3DSA:3.40.50.1820) | chr1:11593039-11595461 REVERS…	-1.53777	0.26069
11775368	glyma01g01800	moderately similar to ( 379)AT1G32200| Symbols: ACT1, ATS1 | ATS1 (ACYLTRANSFERASE 1) | chr1:11602203-11604981 REVERSEmoderately similar to ( 473)PLSB_PHAVU no original description	-1.24847	0.698321
11775384	glyma01g01820	weakly similar to ( 122)AT2G35520| Symbols: DAD2 | DAD2 (DEFENDER AGAINST CELL DEATH 2) | chr2:14928666-14929736 FORWARDweakly similar to ( 127)DAD1_MALDO no original description	1.21995	0.449716
11775388	glyma01g01840	no original description	-1.20136	0.552417
11775397	glyma01g01900	moderately similar to ( 341)AT1G32230| Symbols: CEO, ATP8, CEO1, RCD1 | RCD1 (RADICAL-INDUCED CELL DEATH1) | chr1:11613407-11615874 FORWARD no original description	1.26763	0.182115
11775414	glyma01g01920	weakly similar to ( 194)AT1G32230| Symbols: CEO, ATP8, CEO1, RCD1 | RCD1 (RADICAL-INDUCED CELL DEATH1) | chr1:11613407-11615874 FORWARD no original description	1.16284	0.60917
11775418	glyma01g01930	weakly similar to ( 185)AT1G32260| Symbols: | similar to unknown protein [Arabidopsis thaliana] (TAIR:AT2G35480.1); similar to unnamed protein product [Vitis vinifera] (GB:CAO63339.1) | chr1:11640740-11641764 REVERSE no original description	1.45995	0.0889964
11775425	glyma01g01950	moderately similar to ( 290)AT4G17720| Symbols: | RNA recognition motif (RRM)-containing protein | chr4:9862673-9864511 REVERSE no original description	1.71295	0.0101141
11775432	glyma01g01980	moderately similar to ( 325)AT1G32320| Symbols: ATMKK10 | ATMKK10 (Arabidopsis thaliana MAP kinase kinase 10); kinase | chr1:11655136-11656053 FORWARDweakly similar to ( 184)M2K1_ORYSA no original description	1.03535	0.872617
11775434	glyma01g01990	moderately similar to ( 341)AT1G32330| Symbols: HSFA1D, ATHSFA1D | ATHSFA1D (Arabidopsis thaliana heat shock transcription factor A1D); DNA binding / transcription factor | chr1:11657245-11660214 REVERSE no original description	-1.0867	0.352166
11775448	glyma01g02030	moderately similar to ( 280)AT1G05670| Symbols: | UDP-glucoronosyl/UDP-glucosyl transferase family protein | chr1:1698573-1702714 REVERSEmoderately similar to ( 241)RF1_ORYSA no original description	-1.57618	0.223868
11775458	glyma01g02080	moderately similar to ( 336)AT5G16760| Symbols: | inositol 1,3,4-trisphosphate 5/6-kinase | chr5:5509893-5510852 FORWARDmoderately similar to ( 363)ITPK1_MAIZE no original description	-1.0314	0.966966
11775461	glyma01g02100	moderately similar to ( 303)AT5G46840| Symbols: | RNA recognition motif (RRM)-containing protein | chr5:19023289-19024836 FORWARD no original description	1.12887	0.469313
11775470	glyma01g02110	weakly similar to ( 162)AT4G17940| Symbols: | binding | chr4:9965799-9966790 FORWARD no original description	3.72676	0.0280205
11775476	glyma01g02140	moderately similar to ( 204)AT5G17600| Symbols: | zinc finger (C3HC4-type RING finger) family protein | chr5:5800031-5801119 REVERSE no original description	1.14377	0.733332
11775480	glyma01g02150	moderately similar to ( 210)AT2G35410| Symbols: | 33 kDa ribonucleoprotein, chloroplast, putative / RNA-binding protein cp33, putative | chr2:14905420-14906669 FORWARDweakly similar to ( 118)ROC5_NICSY no original description	-1.71336	0.321275
11775486	glyma01g02180	moderately similar to ( 317)AT4G17900| Symbols: | zinc-binding family protein | chr4:9946826-9947710 FORWARD no original description	-1.05239	0.859384
11775505	glyma01g02240	moderately similar to ( 345)AT4G17895| Symbols: UBP20 | UBP20 (UBIQUITIN-SPECIFIC PROTEASE 20); ubiquitin-specific protease | chr4:9939927-9942711 FORWARD no original description	-1.27531	0.308463
11775516	glyma01g02270	no original description	-1.18287	0.272706
11775522	glyma01g02290	moderately similar to ( 254)AT5G46790| Symbols: | similar to unknown protein [Arabidopsis thaliana] (TAIR:AT4G17870.1); similar to Streptomyces cyclase/dehydrase family protein [Brassica oleracea] (GB:ABD65631.1); contains InterPro domain Streptomyces cyclase/dehydrase (InterPro:IPR005031) | chr5:19001290-19001955 REVERSE no original description	-1.12546	0.760921
11775525	glyma01g02300	moderately similar to ( 417)AT5G46800| Symbols: BOU | BOU (A BOUT DE SOUFFLE); binding | chr5:19006006-19007037 REVERSE no original description	1.03653	0.802855
11775534	glyma01g02320	no original description	1.07514	0.665293
11775544	glyma01g02330	nearly identical (1058)AT4G37870| Symbols: PCK1, PEPCK | PCK1/PEPCK (PHOSPHOENOLPYRUVATE CARBOXYKINASE 1); ATP binding / phosphoenolpyruvate carboxykinase (ATP) | chr4:17802968-17806326 REVERSEnearly identical (1020)PEPCK_MAIZE no original description	1.04908	0.815065
11775559	glyma01g02340	moderately similar to ( 414)AT2G22680| Symbols: | zinc finger (C3HC4-type RING finger) family protein | chr2:9652513-9654564 FORWARD no original description	-1.55542	0.0580638
11775563	glyma01g02350	moderately similar to ( 367)AT2G22670| Symbols: IAA8 | IAA8 (indoleacetic acid-induced protein 8) | chr2:9644216-9645539 FORWARDmoderately similar to ( 211)IAA30_ORYSA no original description	-1.49555	0.0372278
11775577	glyma01g02390	moderately similar to ( 254)AT5G65640| Symbols: BHLH093 | BHLH093 (BETA HLH PROTEIN 93) | chr5:26254363-26255861 FORWARD no original description	-1.39816	0.0709807
11775585	glyma01g02400	highly similar to ( 763)AT2G22660| Symbols: | similar to glycine-rich protein [Arabidopsis thaliana] (TAIR:AT4G37900.1); similar to unnamed protein product [Vitis vinifera] (GB:CAO44607.1); similar to unnamed protein product [Vitis vinifera] (GB:CAO38708.1); similar to glycine-rich protein [Medicago truncatula] (GB:ABY48136.1); contains InterPro domain Protein of unknown function DUF1399 (InterPr…	1.95864	0.088803
11775597	glyma01g02420	moderately similar to ( 465)AT4G37920| Symbols: | similar to unknown protein [Arabidopsis thaliana] (TAIR:AT1G36320.1); similar to putative protein [Medicago truncatula] (GB:ABY48137.1) | chr4:17828532-17830311 REVERSE no original description	1.39561	0.0512071
11775606	glyma01g02470	weakly similar to ( 132)AT2G22640| Symbols: HSPC300, BRK1 | BRK1/HSPC300 (BRICK1) | chr2:9630363-9631018 FORWARDweakly similar to ( 121)BRK1_MAIZE no original description	1.27586	0.149464
11775613	glyma01g02480	nearly identical (1177)AT5G65620| Symbols: | peptidase M3 family protein / thimet oligopeptidase family protein | chr5:26239177-26243010 FORWARD no original description	1.09243	0.585337
11775633	glyma01g02490	no original description	-1.22289	0.179057
11775639	glyma01g02520	no original description	1.37285	0.28392
11775646	glyma01g02530	weakly similar to ( 112)AT4G37940| Symbols: AGL21 | AGL21 (AGAMOUS-LIKE 21); transcription factor | chr4:17835689-17838615 REVERSEweakly similar to ( 113)MAD27_ORYSA no original description	1.11326	0.743784
11775651	glyma01g02540	weakly similar to ( 135)AT5G10530| Symbols: | lectin protein kinase, putative | chr5:3324979-3326934 REVERSEweakly similar to ( 159)LEC_SOYBN no original description	-1.34061	0.454858
11775655	glyma01g02570	moderately similar to ( 453)AT4G37980| Symbols: ELI3-1 | ELI3-1 (ELICITOR-ACTIVATED GENE 3); binding / catalytic/ oxidoreductase/ zinc ion binding | chr4:17852664-17853908 FORWARDhighly similar to ( 553)MTDH_FRAAN no original description	-1.23254	0.338145
11775666	glyma01g02620	nearly identical (1045)AT2G22610| Symbols: | kinesin motor protein-related | chr2:9606630-9611706 FORWARDmoderately similar to ( 218)FLA10_CHLRE no original description	-1.22238	0.378865
11775687	glyma01g02640	moderately similar to ( 254)AT2G22600| Symbols: | KH domain-containing protein | chr2:9603697-9606130 FORWARD no original description	2.39761	0.0202202
11775698	glyma01g02660	moderately similar to ( 278)AT5G65540| Symbols: | similar to unnamed protein product [Vitis vinifera] (GB:CAO23654.1) | chr5:26212936-26215338 FORWARD no original description	1.11487	0.568812
11775705	glyma01g02710	no original description	1.30327	0.301584
11775710	glyma01g02760	moderately similar to ( 476)AT5G10510| Symbols: AIL6 | AIL6 (AINTEGUMENTA-LIKE 6) | chr5:3315992-3320009 FORWARDmoderately similar to ( 306)BBM1_BRANA no original description	-1.11591	0.623886
11775725	glyma01g02790	highly similar to ( 790)AT4G38050| Symbols: | transmembrane transporter | chr4:17869523-17872455 REVERSE no original description	-1.5779	0.158584
11775739	glyma01g02810	highly similar to ( 637)AT2G22560| Symbols: | kinase interacting protein-related | chr2:9592972-9595918 FORWARD no original description	1.24502	0.168786
11775745	glyma01g02820	no original description	2.98368	0.0318874
11775751	glyma01g02850	highly similar to ( 773)AT5G65470| Symbols: | similar to unknown protein [Arabidopsis thaliana] (TAIR:AT4G24530.1); similar to unnamed protein product [Vitis vinifera] (GB:CAO61608.1); similar to unknown [Populus trichocarpa] (GB:ABK95421.1); similar to hypothetical protein [Vitis vinifera] (GB:CAN78778.1); contains InterPro domain Protein of unknown function DUF246, plant (InterPro:IPR004348) | …	-1.49851	0.121403
11775765	glyma01g02880	moderately similar to ( 275)AT2G22540| Symbols: AGL22, SVP | SVP (SHORT VEGETATIVE PHASE); transcription factor | chr2:9587497-9590683 FORWARDweakly similar to ( 195)MAD47_ORYSA no original description	-1.03578	0.906501
11775775	glyma01g02940	moderately similar to ( 481)AT5G65450| Symbols: | ubiquitin carboxyl-terminal hydrolase family protein / zinc finger (MYND type) family protein | chr5:26175089-26178322 FORWARD no original description	-1.13142	0.300451
11775792	glyma01g03020	weakly similar to ( 135)AT4G38100| Symbols: | threonine endopeptidase | chr4:17887027-17888171 REVERSE no original description	1.19747	0.351077
11775799	glyma01g03040	highly similar to ( 801)AT2G22480| Symbols: | phosphofructokinase family protein | chr2:9552750-9555494 FORWARD no original description	-1.34977	0.443742
11775813	glyma01g03060	weakly similar to ( 196)AT4G24660| Symbols: ATHB22, MEE68 | ATHB22/MEE68 (ARABIDOPSIS THALIANA HOMEOBOX PROTEIN 22); DNA binding / transcription factor | chr4:12724861-12725523 REVERSE no original description	-1.10672	0.495387
11775823	glyma01g03120	moderately similar to ( 238)AT4G10500| Symbols: | oxidoreductase, 2OG-Fe(II) oxygenase family protein | chr4:6491085-6492338 FORWARDweakly similar to ( 164)FLS_PETHY no original description	-1.20625	0.348894
11775831	glyma01g03130	moderately similar to ( 400)AT1G12970| Symbols: | leucine-rich repeat family protein | chr1:4423725-4425630 FORWARD no original description	2.69471	0.00809811
11775840	glyma01g03150	weakly similar to ( 148)AT3G26510| Symbols: | octicosapeptide/Phox/Bem1p (PB1) domain-containing protein | chr3:9713123-9713779 REVERSE no original description	-1.0504	0.855416
11775847	glyma01g03160	highly similar to ( 937)AT1G70610| Symbols: ATTAP1 | ATTAP1 (Arabidopsis thaliana transporter associated with antigen processing protein 1); ATPase, coupled to transmembrane movement of substances | chr1:26625749-26629994 FORWARDmoderately similar to ( 243)MDR_ORYSA no original description	-1.33478	0.134397
11775870	glyma01g03190	moderately similar to ( 466)AT3G26590| Symbols: | MATE efflux family protein | chr3:9763164-9766496 REVERSE no original description	-2.85421	0.0378931
11775879	glyma01g03220	moderately similar to ( 375)AT1G70590| Symbols: | F-box family protein | chr1:26622066-26623822 FORWARD no original description	1.05679	0.878043
11775887	glyma01g03240	no original description	1.0198	0.964462
11775890	glyma01g03260	highly similar to ( 874)AT1G70580| Symbols: GGT2, AOAT2 | AOAT2 (GLUTAMATE:GLYOXYLATE AMINOTRANSFERASE 2); alanine transaminase | chr1:26616885-26619508 FORWARDmoderately similar to ( 485)ALA2_HORVU no original description	-1.19735	0.132616
11775912	glyma01g03310	moderately similar to ( 215)AT4G08770| Symbols: | peroxidase, putative | chr4:5598256-5600259 REVERSEweakly similar to ( 194)PER2_ARAHY no original description	1.01415	0.965818
11775917	glyma01g03340	moderately similar to ( 421)AT1G70560| Symbols: | alliinase C-terminal domain-containing protein | chr1:26608557-26610982 FORWARD no original description	1.03131	0.936968
11775929	glyma01g03360	highly similar to ( 556)AT1G10740| Symbols: | similar to unknown protein [Arabidopsis thaliana] (TAIR:AT1G23330.1); similar to unnamed protein product [Vitis vinifera] (GB:CAO42648.1); contains domain SSF53474 (SSF53474); contains domain G3DSA:3.40.50.1820 (G3DSA:3.40.50.1820) | chr1:3568613-3570467 REVERSE no original description	1.74744	0.0844938
11775944	glyma01g03380	very weakly similar to (88.2)AT2G44820| Symbols: | similar to unnamed protein product [Vitis vinifera] (GB:CAO67279.1) | chr2:18491765-18492592 FORWARD no original description	-1.0957	0.483187
11775951	glyma01g03390	highly similar to ( 621)AT1G70550| Symbols: | similar to unknown protein [Arabidopsis thaliana] (TAIR:AT1G23340.1); similar to unknown protein [Arabidopsis thaliana] (TAIR:AT1G10750.1); similar to unknown protein [Arabidopsis thaliana] (TAIR:AT1G23340.2); similar to hypothetical protein [Vitis vinifera] (GB:CAN78442.1); similar to putative carboxyl-terminal proteinase [Gossypium hirsutum] (GB:AAK…	-1.98759	0.0975883
11775962	glyma01g03400	highly similar to ( 539)AT3G26610| Symbols: | polygalacturonase, putative / pectinase, putative | chr3:9778262-9781504 FORWARDmoderately similar to ( 238)PGLR_ACTCH no original description	1.15804	0.774142
11775971	glyma01g03430	moderately similar to ( 340)AT1G23360| Symbols: | UbiE/COQ5 methyltransferase family protein | chr1:8295410-8296328 REVERSE no original description	-1.29195	0.574415
11775981	glyma01g03450	moderately similar to ( 352)AT1G23380| Symbols: KNAT6L, KNAT6S, KNAT6 | KNAT6 (Knotted-like Arabidopsis thaliana 6); DNA binding / transcription factor | chr1:8297488-8302481 REVERSEmoderately similar to ( 229)HSBH1_SOYBN no original description	1.0619	0.860215
11775988	glyma01g03480	highly similar to ( 563)AT1G60790| Symbols: | similar to unknown protein [Arabidopsis thaliana] (TAIR:AT5G06700.1); similar to unnamed protein product [Vitis vinifera] (GB:CAO66110.1); contains InterPro domain Protein of unknown function DUF231, plant (InterPro:IPR004253) | chr1:22383858-22385881 REVERSE no original description	1.21235	0.153278
11775996	glyma01g03490	highly similar to ( 906)AT1G60800| Symbols: NIK3 | NIK3 (NSP-INTERACTING KINASE 3); kinase | chr1:22387266-22390596 REVERSEmoderately similar to ( 266)PSKR_DAUCA no original description	-1.69347	0.0566051
11776012	glyma01g03500	moderately similar to ( 236)AT1G23390| Symbols: | kelch repeat-containing F-box family protein | chr1:8309438-8310622 REVERSE no original description	-1.60946	0.316475
11776014	glyma01g03510	no original description	-1.01263	0.980875
11776023	glyma01g03530	highly similar to ( 731)AT1G10670| Symbols: ACLA-1 | ACLA-1 (ATP-citrate lyase A-1) | chr1:3535788-3538099 FORWARD no original description	-1.2377	0.140268
11776038	glyma01g03550	moderately similar to ( 344)AT1G10660| Symbols: | similar to unknown protein [Arabidopsis thaliana] (TAIR:AT5G62960.1); similar to unnamed protein product [Vitis vinifera] (GB:CAO64308.1) | chr1:3533010-3534782 FORWARD no original description	1.50177	0.0255006
11776050	glyma01g03590	weakly similar to ( 136)AT1G61700| Symbols: | DNA-directed RNA polymerase II, putative (RPB10) | chr1:22790770-22791777 FORWARDweakly similar to ( 127)RPB10_BRANA no original description	1.25057	0.12892
11776063	glyma01g03660	moderately similar to ( 224)AT1G60460| Symbols: | similar to hypothetical protein OsI_023542 [Oryza sativa (indica cultivar-group)] (GB:EAZ02310.1) | chr1:22279265-22282230 FORWARD no original description	1.03621	0.867715
11776069	glyma01g03690	highly similar to ( 516)AT1G23540| Symbols: | protein kinase family protein | chr1:8346931-8349775 REVERSEmoderately similar to ( 253)NORK_MEDTR no original description	1.1898	0.682927
11776080	glyma01g03710	moderately similar to ( 302)AT1G10600| Symbols: | similar to mov34 family protein [Arabidopsis thaliana] (TAIR:AT1G48790.1); similar to unnamed protein product [Vitis vinifera] (GB:CAO66068.1); contains InterPro domain Mov34/MPN/PAD-1 (InterPro:IPR000555) | chr1:3503766-3505191 FORWARD no original description	1.53633	0.14316
11776093	glyma01g03730	moderately similar to ( 210)AT1G23750| Symbols: | DNA-binding protein-related | chr1:8400627-8401160 FORWARD no original description	-1.15619	0.623976
11776101	glyma01g03820	highly similar to ( 872)AT1G23800| Symbols: ALDH2B, ALDH2B7 | ALDH2B7 (Aldehyde dehydrogenase 2B7); 3-chloroallyl aldehyde dehydrogenase/ aldehyde dehydrogenase (NAD) | chr1:8412227-8414793 REVERSEmoderately similar to ( 367)BADH_SPIOL no original description	3.36241	0.0270195
11776118	glyma01g03900	moderately similar to ( 288)AT5G40250| Symbols: | zinc finger (C3HC4-type RING finger) family protein | chr5:16103284-16104414 FORWARD no original description	-1.17381	0.643359
11776123	glyma01g03910	no original description	5.90581	0.0302416
11776128	glyma01g03940	moderately similar to ( 418)AT1G60060| Symbols: | similar to unknown protein [Arabidopsis thaliana] (TAIR:AT5G53900.2); similar to unnamed protein product [Vitis vinifera] (GB:CAO40921.1); contains domain PTHR13902:SF3 (PTHR13902:SF3); contains domain PTHR13902 (PTHR13902) | chr1:22142947-22145250 FORWARD no original description	-1.14402	0.735343
11776141	glyma01g03960	moderately similar to ( 357)AT5G17680| Symbols: | disease resistance protein (TIR-NBS-LRR class), putative | chr5:5823001-5827155 FORWARD no original description	1.2219	0.228812
11776152	glyma01g04070	weakly similar to ( 179)AT1G24020| Symbols: MLP423 | MLP423 (MLP-LIKE PROTEIN 423) | chr1:8500642-8501447 REVERSE no original description	-2.01692	0.118497
11776157	glyma01g04090	moderately similar to ( 286)AT1G24040| Symbols: | GCN5-related N-acetyltransferase (GNAT) family protein | chr1:8505783-8506742 REVERSE no original description	-1.67626	0.0614164
11776164	glyma01g04100	highly similar to ( 507)AT1G70230| Symbols: | similar to unknown protein [Arabidopsis thaliana] (TAIR:AT1G01430.1); similar to Os09g0375300 [Oryza sativa (japonica cultivar-group)] (GB:NP_001063036.1); similar to Os06g0235200 [Oryza sativa (japonica cultivar-group)] (GB:NP_001057240.1); similar to leaf senescence protein-like [Oryza sativa (japonica cultivar-group)] (GB:BAD26032.1); contains Inte…	1.34089	0.479434
11776169	glyma01g04120	moderately similar to ( 342)AT1G70230| Symbols: | similar to unknown protein [Arabidopsis thaliana] (TAIR:AT1G01430.1); similar to Os09g0375300 [Oryza sativa (japonica cultivar-group)] (GB:NP_001063036.1); similar to Os06g0235200 [Oryza sativa (japonica cultivar-group)] (GB:NP_001057240.1); similar to leaf senescence protein-like [Oryza sativa (japonica cultivar-group)] (GB:BAD26032.1); contains …	1.87695	0.0573963
11776173	glyma01g04130	moderately similar to ( 353)AT1G70230| Symbols: | similar to unknown protein [Arabidopsis thaliana] (TAIR:AT1G01430.1); similar to Os09g0375300 [Oryza sativa (japonica cultivar-group)] (GB:NP_001063036.1); similar to Os06g0235200 [Oryza sativa (japonica cultivar-group)] (GB:NP_001057240.1); similar to leaf senescence protein-like [Oryza sativa (japonica cultivar-group)] (GB:BAD26032.1); contains …	-2.15267	0.0778879
11776178	glyma01g04140	moderately similar to ( 305)AT1G70230| Symbols: | similar to unknown protein [Arabidopsis thaliana] (TAIR:AT1G01430.1); similar to Os09g0375300 [Oryza sativa (japonica cultivar-group)] (GB:NP_001063036.1); similar to Os06g0235200 [Oryza sativa (japonica cultivar-group)] (GB:NP_001057240.1); similar to leaf senescence protein-like [Oryza sativa (japonica cultivar-group)] (GB:BAD26032.1); contains …	-1.51962	0.115709
11776183	glyma01g04150	moderately similar to ( 309)AT1G70230| Symbols: | similar to unknown protein [Arabidopsis thaliana] (TAIR:AT1G01430.1); similar to Os09g0375300 [Oryza sativa (japonica cultivar-group)] (GB:NP_001063036.1); similar to Os06g0235200 [Oryza sativa (japonica cultivar-group)] (GB:NP_001057240.1); similar to leaf senescence protein-like [Oryza sativa (japonica cultivar-group)] (GB:BAD26032.1); contains …	-1.09352	0.812338
11776191	glyma01g04220	moderately similar to ( 343)AT1G70210| Symbols: CYCD1;1 | CYCD1;1 (CYCLIN D1;1); cyclin-dependent protein kinase regulator | chr1:26443678-26445643 FORWARD no original description	1.47105	0.166924
11776199	glyma01g04250	moderately similar to ( 483)AT1G24100| Symbols: UGT74B1 | UGT74B1 (UDP-glucosyl transferase 74B1); UDP-glycosyltransferase/ thiohydroximate beta-D-glucosyltransferase/ transferase, transferring glycosyl groups | chr1:8525536-8526999 REVERSEmoderately similar to ( 325)IAAG_MAIZE no original description	3.27569	0.0374937
11776213	glyma01g04270	highly similar to ( 580)AT1G10510| Symbols: EMB2004 | EMB2004 (EMBRYO DEFECTIVE 2004); protein binding | chr1:3461772-3465591 FORWARD no original description	-1.99063	0.0303919
11776236	glyma01g04300	highly similar to ( 539)AT1G24120| Symbols: ARL1 | ARL1 (ARG1-LIKE 1); heat shock protein binding / unfolded protein binding | chr1:8529272-8531935 REVERSE no original description	-1.04635	0.74001
11776251	glyma01g04310	no original description	-1.18646	0.438684
11776255	glyma01g04320	no original description	1.18728	0.316099
11776269	glyma01g04340	moderately similar to ( 370)AT1G24130| Symbols: | transducin family protein / WD-40 repeat family protein | chr1:8534172-8535419 REVERSE no original description	1.10318	0.831977
11776273	glyma01g04350	weakly similar to ( 138)AT1G59970| Symbols: | matrixin family protein | chr1:22077266-22078348 FORWARDweakly similar to ( 114)MEP1_SOYBN no original description	-1.67483	0.304465
11776276	glyma01g04380	moderately similar to ( 329)AT1G24140| Symbols: | matrixin family protein | chr1:8536120-8537274 REVERSEmoderately similar to ( 278)MEP1_SOYBN no original description	2.15179	0.0577494
11776280	glyma01g04400	highly similar to ( 862)AT1G70160| Symbols: | similar to unknown protein [Arabidopsis thaliana] (TAIR:AT5G54870.1); similar to unknown protein [Arabidopsis thaliana] (TAIR:AT4G27020.1); similar to unknown [Picea sitchensis] (GB:ABK24649.1); similar to hypothetical protein OsI_030218 [Oryza sativa (indica cultivar-group)] (GB:EAZ08986.1); similar to unnamed protein product [Vitis vinifera] (GB:CAO…	-1.19287	0.445434
11776289	glyma01g04410	moderately similar to ( 402)AT1G70150| Symbols: | zinc finger (MYND type) family protein | chr1:26420561-26422880 FORWARD no original description	-1.04214	0.769238
11776302	glyma01g04440	weakly similar to ( 144)AT1G70100| Symbols: | similar to unknown protein [Arabidopsis thaliana] (TAIR:AT1G24160.1); similar to unnamed protein product [Vitis vinifera] (GB:CAO40971.1) | chr1:26407399-26409433 FORWARD no original description	1.20407	0.529036
11776314	glyma01g04460	highly similar to ( 526)AT1G70090| Symbols: GATL9, LGT8 | GATL9/LGT8 (Galacturonosyltransferase-like 9) | chr1:26404590-26405762 FORWARD no original description	-1.05873	0.731052
11776318	glyma01g04470	moderately similar to ( 210)AT1G59900| Symbols: AT-E1 ALPHA | AT-E1 ALPHA (pyruvate dehydrogenase complex E1 alpha subunit); pyruvate dehydrogenase (acetyl-transferring) | chr1:22055033-22057325 FORWARDmoderately similar to ( 232)ODPA_PEA no original description	1.1665	0.659395
11776327	glyma01g04480	highly similar to ( 713)AT1G70070| Symbols: PDE317, ISE2, EMB25 | EMB25 (EMBRYO DEFECTIVE 25); ATP-dependent helicase/ RNA helicase | chr1:26393679-26397811 REVERSE no original description	1.10245	0.629133
11776332	glyma01g04490	nearly identical (1231)AT1G70060| Symbols: | paired amphipathic helix repeat-containing protein | chr1:26387452-26393231 FORWARD no original description	1.68084	0.0215967
11776365	glyma01g04570	highly similar to ( 637)AT1G10430| Symbols: PP2A-2 | PP2A-2 (protein phosphatase 2a-2); protein serine/threonine phosphatase | chr1:3428706-3430438 REVERSEhighly similar to ( 642)PP2A_HEVBR no original description	1.47186	0.161427
11776375	glyma01g04580	no original description	-2.04806	0.0602911
11776380	glyma01g04610	moderately similar to ( 234)AT1G59640| Symbols: BPE, BPEUB, BPEP, ZCW32 | ZCW32 (BIGPETAL, BIGPETALUB); DNA binding / transcription factor | chr1:21913300-21914695 REVERSE no original description	-1.36525	0.088173
11776393	glyma01g04640	moderately similar to ( 210)AT4G08850| Symbols: | leucine-rich repeat family protein / protein kinase family protein | chr4:5637464-5640493 REVERSEweakly similar to ( 177)PSKR_DAUCA no original description	-1.09396	0.618707
11776400	glyma01g04650	highly similar to ( 777)AT1G10385| Symbols: | similar to unknown protein [Arabidopsis thaliana] (TAIR:AT5G49830.1); similar to unnamed protein product [Vitis vinifera] (GB:CAO40996.1); similar to hypothetical protein [Vitis vinifera] (GB:CAN69091.1); similar to unnamed protein product [Vitis vinifera] (GB:CAO23193.1); contains domain gb def: F14N23.28 (PTHR21426:SF4); contains domain FAMILY NOT N…	-1.28993	0.583635
11776407	glyma01g04670	moderately similar to ( 290)AT1G10380| Symbols: | similar to unknown protein [Arabidopsis thaliana] (TAIR:AT3G17350.1); similar to unnamed protein product [Vitis vinifera] (GB:CAO40998.1); contains domain PROKAR_LIPOPROTEIN (PS51257) | chr1:3400707-3402111 FORWARD no original description	-1.76709	0.0425358
11776418	glyma01g04760	weakly similar to ( 127)AT5G39950| Symbols: ATH2, ATTRXH2, TRXH2, ATTRX2 | ATTRX2 (ARABIDOPSIS THIOREDOXIN H2); thiol-disulfide exchange intermediate | chr5:16008113-16009109 REVERSEweakly similar to ( 108)TRXH1_TOBAC no original description	-1.53299	0.082701
11776424	glyma01g04790	nearly identical (1138)AT1G32490| Symbols: EMB2733, ESP3 | EMB2733/ESP3 (EMBRYO DEFECTIVE 2733); ATP-dependent RNA helicase | chr1:11742336-11749266 REVERSE no original description	1.41223	0.231864
11776429	glyma01g04800	weakly similar to ( 111)AT1G59730| Symbols: ATH7 | ATH7 (thioredoxin H-type 7); thiol-disulfide exchange intermediate | chr1:21956424-21957057 REVERSEvery weakly similar to (97.4)TRXH_BRAOL no original description	-1.03398	0.931332
11776434	glyma01g04810	weakly similar to ( 110)AT5G39950| Symbols: ATH2, ATTRXH2, TRXH2, ATTRX2 | ATTRX2 (ARABIDOPSIS THIOREDOXIN H2); thiol-disulfide exchange intermediate | chr5:16008113-16009109 REVERSEvery weakly similar to (93.2)TRXH_BRAOL no original description	1.0703	0.880041
11776440	glyma01g04820	moderately similar to ( 228)AT1G27090| Symbols: | glycine-rich protein | chr1:9404028-9406085 REVERSE no original description	1.00483	0.95579
11776447	glyma01g04830	moderately similar to ( 310)AT1G69870| Symbols: | proton-dependent oligopeptide transport (POT) family protein | chr1:26319871-26323760 FORWARD no original description	-1.7038	0.190373
11776456	glyma01g04850	moderately similar to ( 420)AT1G69870| Symbols: | proton-dependent oligopeptide transport (POT) family protein | chr1:26319871-26323760 FORWARD no original description	1.00973	0.980551
11776464	glyma01g04870	moderately similar to ( 406)AT1G27060| Symbols: | regulator of chromosome condensation (RCC1) family protein | chr1:9395010-9396660 FORWARD no original description	-1.04834	0.845418
11776473	glyma01g04880	weakly similar to ( 159)AT1G27050| Symbols: ATHB54 | ATHB54 (ARABIDOPSIS THALIANA HOMEOBOX PROTEIN 54); nucleic acid binding / transcription factor | chr1:9391880-9394395 FORWARD no original description	1.43629	0.219379
11776477	glyma01g04890	weakly similar to ( 138)AT3G01470| Symbols: ATHB1, HD-ZIP-1, HAT5, ATHB-1 | ATHB-1 (Homeobox-leucine zipper protein HAT5); transcription factor | chr3:182655-184041 REVERSE no original description	1.4429	0.102838
11776484	glyma01g04920	moderately similar to ( 386)AT2G02710| Symbols: | PAC motif-containing protein | chr2:758811-760607 REVERSE no original description	-2.04892	0.0502674
11776494	glyma01g04940	moderately similar to ( 249)AT1G07040| Symbols: | similar to unknown protein [Arabidopsis thaliana] (TAIR:AT1G27030.1); similar to unnamed protein product [Vitis vinifera] (GB:CAO41035.1) | chr1:2161224-2163034 REVERSE no original description	1.05679	0.720606
11776500	glyma01g04980	moderately similar to ( 209)AT1G27000| Symbols: | bZIP family transcription factor | chr1:9374055-9376409 FORWARD no original description	1.36671	0.0304269
11776522	glyma01g05010	no original description	-1.33436	0.304649
11776524	glyma01g05070	moderately similar to ( 315)AT2G02750| Symbols: | pentatricopeptide (PPR) repeat-containing protein | chr2:771640-773481 REVERSE no original description	-1.13227	0.736373
11776532	glyma01g05090	highly similar to ( 501)AT1G14390| Symbols: | leucine-rich repeat transmembrane protein kinase, putative | chr1:4924272-4926789 FORWARDweakly similar to ( 116)NORK_MEDTR no original description	1.03088	0.965447
11776551	glyma01g05150	moderately similar to ( 273)AT1G17100| Symbols: | SOUL heme-binding family protein | chr1:5844759-5845532 FORWARD no original description	-1.90375	0.0105781
11776556	glyma01g05160	highly similar to ( 598)AT2G02800| Symbols: APK2B | APK2B (PROTEIN KINASE 2B); kinase | chr2:796888-799249 REVERSEmoderately similar to ( 228)NORK_MEDTR no original description	3.05475	0.00863046
11776567	glyma01g05190	moderately similar to ( 435)AT2G02820| Symbols: AtMYB88, MYB88 | MYB88 (myb domain protein 88); DNA binding / transcription factor | chr2:804715-807138 REVERSE no original description	-2.09006	0.0369087
11776584	glyma01g05220	weakly similar to ( 182)AT1G14345| Symbols: | oxidoreductase | chr1:4899171-4899761 FORWARD no original description	-1.48199	0.117793
11776587	glyma01g05230	moderately similar to ( 290)AT1G69780| Symbols: ATHB13 | ATHB13; DNA binding / transcription factor | chr1:26262829-26264128 FORWARD no original description	-3.39212	0.0185687
11776603	glyma01g05250	very weakly similar to (85.9)AT3G13870| Symbols: RHD3 | RHD3 (ROOT HAIR DEFECTIVE 3) | chr3:4565769-4571116 REVERSE no original description	1.23592	0.480727
11776632	glyma01g05310	very weakly similar to ( 100)AT1G26945| Symbols: | transcription regulator | chr1:9351558-9352461 FORWARD no original description	-1.24172	0.417549
11776636	glyma01g05320	moderately similar to ( 310)AT1G26940| Symbols: | peptidyl-prolyl cis-trans isomerase cyclophilin-type family protein | chr1:9343180-9344949 FORWARD no original description	1.37325	0.0172883
11776645	glyma01g05370	moderately similar to ( 221)AT1G69700| Symbols: ATHVA22C | ATHVA22C (Arabidopsis thaliana HVA22 homologue C) | chr1:26224000-26225326 FORWARDvery weakly similar to (89.7)HVA22_HORVU no original description	-1.06455	0.879885
11776663	glyma01g05410	weakly similar to ( 114)AT3G47620| Symbols: ATTCP14 | TCP family transcription factor, putative | chr3:17569989-17571458 FORWARD no original description	-1.0281	0.907759
11776671	glyma01g05430	moderately similar to ( 262)AT1G69680| Symbols: | similar to unknown [Populus trichocarpa] (GB:ABK93471.1); contains InterPro domain Mog1/PsbP/DUF1795, alpha/beta/alpha sandwich (InterPro:IPR016124); contains InterPro domain Mog1/PsbP, alpha/beta/alpha sandwich (InterPro:IPR016123); contains InterPro domain Ran-interacting Mog1 protein (InterPro:IPR007681) | chr1:26208811-26210231 FORWARD no orig…	1.09899	0.658029
11776682	glyma01g05440	moderately similar to ( 416)AT3G05290| Symbols: | mitochondrial substrate carrier family protein | chr3:1506135-1507620 REVERSE no original description	3.34694	0.0151323
11776690	glyma01g05450	no original description	-1.23397	0.744732
11776696	glyma01g05490	moderately similar to ( 297)AT1G14310| Symbols: | haloacid dehalogenase-like hydrolase family protein | chr1:4885044-4886667 FORWARD no original description	-1.5507	0.018813
11776709	glyma01g05500	moderately similar to ( 330)AT2G15480| Symbols: UGT73B5 | UGT73B5 (UDP-GLUCOSYL TRANSFERASE 73B5); UDP-glycosyltransferase/ transferase, transferring glycosyl groups | chr2:6765899-6767534 FORWARDweakly similar to ( 134)ZOX_PHAVU no original description	1.00232	0.997202
11776712	glyma01g05560	weakly similar to ( 110)AT2G02950| Symbols: PKS1 | PKS1 (PHYTOCHROME KINASE SUBSTRATE 1) | chr2:855148-856467 REVERSE no original description	-2.07492	0.0682087
11776715	glyma01g05580	nearly identical (1071)AT1G26850| Symbols: | dehydration-responsive family protein | chr1:9301133-9303419 REVERSE no original description	1.37788	0.396308
11776741	glyma01g05710	moderately similar to ( 476)AT5G36930| Symbols: | disease resistance protein (TIR-NBS-LRR class), putative | chr5:14585001-14589146 REVERSE no original description	1.03405	0.937127
11776756	glyma01g05740	weakly similar to ( 139)AT1G26880| Symbols: | 60S ribosomal protein L34 (RPL34A) | chr1:9315785-9316668 REVERSEweakly similar to ( 140)RL34_TOBAC no original description	-1.54259	0.0674326
11776767	glyma01g05870	very weakly similar to (80.9)AT1G14205| Symbols: | ribosomal protein L18 family protein | chr1:4855577-4856757 FORWARD no original description	-1.95701	0.238152
11776774	glyma01g05890	highly similar to ( 629)AT1G14190| Symbols: | glucose-methanol-choline (GMC) oxidoreductase family protein | chr1:4852797-4854302 FORWARD no original description	1.06853	0.923371
11776778	glyma01g05900	moderately similar to ( 412)AT1G14185| Symbols: | glucose-methanol-choline (GMC) oxidoreductase family protein | chr1:4850279-4851880 FORWARD no original description	1.23689	0.646875
11776789	glyma01g05920	weakly similar to ( 105)AT1G69580| Symbols: | similar to myb family transcription factor [Arabidopsis thaliana] (TAIR:AT3G04030.3); similar to unnamed protein product [Vitis vinifera] (GB:CAO48371.1); contains InterPro domain Homeodomain-related; (InterPro:IPR012287); contains InterPro domain Homeodomain-like (InterPro:IPR009057); contains InterPro domain Myb, DNA-binding (InterPro:IPR014778); co…	-1.34116	0.427773
11776800	glyma01g05980	moderately similar to ( 226)AT1G69560| Symbols: AtMYB105, MYB105 | MYB105 (myb domain protein 105); DNA binding / transcription factor | chr1:26161418-26162569 FORWARDvery weakly similar to (99.4)MYB1_MAIZE no original description	-1.25404	0.317417
11776809	glyma01g06010	moderately similar to ( 271)AT2G03050| Symbols: | mitochondrial transcription termination factor-related / mTERF-related | chr2:900093-900944 REVERSE no original description	1.17924	0.389103
11776812	glyma01g06030	moderately similar to ( 309)AT2G03090| Symbols: EXP15, ATEXP15, ATHEXP ALPHA 1.3, ATEXPA15 | ATEXPA15 (ARABIDOPSIS THALIANA EXPANSIN A15) | chr2:917360-918553 REVERSEmoderately similar to ( 283)EXPA2_ORYSA no original description	-1.81062	0.0550386
11776821	glyma01g06060	very weakly similar to (83.2)AT5G18260| Symbols: | protein binding / zinc ion binding | chr5:6036228-6037297 REVERSE no original description	1.12375	0.643762
11776830	glyma01g06080	weakly similar to ( 107)AT5G64130| Symbols: | similar to unknown protein [Arabidopsis thaliana] (TAIR:AT1G69510.2); similar to unknown protein [Arabidopsis thaliana] (TAIR:AT1G69510.1); similar to unknown protein [Arabidopsis thaliana] (TAIR:AT1G69510.3); similar to hypothetical protein [Vitis vinifera] (GB:CAN80447.1); contains InterPro domain Lg106-like (InterPro:IPR012482) | chr5:25681773-2568…	1.80774	0.0253483
11776839	glyma01g06110	weakly similar to ( 181)AT1G14150| Symbols: | oxygen evolving enhancer 3 (PsbQ) family protein | chr1:4839882-4840629 FORWARD no original description	-1.57136	0.0426857
11776857	glyma01g06150	moderately similar to ( 257)AT1G69490| Symbols: ANAC029, ATNAP, NAP | NAP (NAC-LIKE, ACTIVATED BY AP3/PI); transcription factor | chr1:26125896-26126885 FORWARDweakly similar to ( 193)NAC68_ORYSA no original description	2.28606	0.126902
11776870	glyma01g06270	weakly similar to ( 176)AT3G52220| Symbols: | similar to unnamed protein product [Vitis vinifera] (GB:CAO62409.1); contains domain PTHR14580 (PTHR14580) | chr3:19380558-19381958 REVERSE no original description	1.24271	0.439077
11776877	glyma01g06280	moderately similar to ( 431)AT1G14020| Symbols: | similar to unknown protein [Arabidopsis thaliana] (TAIR:AT2G03280.1); similar to unknown protein [Arabidopsis thaliana] (TAIR:AT2G03280.2); similar to unknown [Populus trichocarpa] (GB:ABK94283.1); contains InterPro domain Protein of unknown function DUF246, plant (InterPro:IPR004348) | chr1:4802927-4805108 FORWARD no original description	1.22178	0.295389
11776889	glyma01g06290	highly similar to ( 696)AT1G14000| Symbols: | protein kinase family protein / ankyrin repeat family protein | chr1:4797603-4800040 FORWARDweakly similar to ( 108)PSKR_DAUCA no original description	-1.14486	0.543093
11776903	glyma01g06300	moderately similar to ( 281)AT1G13990| Symbols: | similar to unnamed protein product [Vitis vinifera] (GB:CAO68469.1) | chr1:4794807-4796473 FORWARD no original description	1.88879	0.109076
11776910	glyma01g06320	moderately similar to ( 280)AT1G26670| Symbols: VTI12, ATVTI12, VTI1B | ATVTI12/VTI12/VTI1B (VESICAL TRANSPORT V-SNARE 12); SNARE binding / receptor/ soluble NSF attachment protein | chr1:9216090-9217780 FORWARD no original description	1.6622	0.128111
11776918	glyma01g06380	weakly similar to ( 154)AT1G26660| Symbols: | c-myc binding protein, putative / prefoldin, putative | chr1:9212285-9213752 FORWARD no original description	-1.42402	0.252267
11776936	glyma01g06440	no original description	1.05603	0.907007
11776942	glyma01g06450	highly similar to ( 593)AT1G69420| Symbols: | zinc finger (DHHC type) family protein | chr1:26097353-26100399 FORWARD no original description	-1.59535	0.289766
11776973	glyma01g06550	moderately similar to ( 353)AT1G13960| Symbols: WRKY4 | WRKY4 (WRKY DNA-binding protein 4); transcription factor | chr1:4776619-4779040 FORWARD no original description	4.73254	0.00481983
11776980	glyma01g06560	weakly similar to ( 123)AT5G42560| Symbols: | abscisic acid-responsive HVA22 family protein | chr5:17032931-17034197 FORWARDvery weakly similar to (83.6)ACOC_CUCMA no original description	-1.18827	0.159355
11776987	glyma01g06600	weakly similar to ( 174)AT1G69410| Symbols: | eukaryotic translation initiation factor 5A, putative / eIF-5A, putative | chr1:26092964-26093857 FORWARDweakly similar to ( 196)IF5A2_NICPL no original description	1.03355	0.952007
11776997	glyma01g06610	moderately similar to ( 335)AT1G69400| Symbols: | transducin family protein / WD-40 repeat family protein | chr1:26090690-26092469 FORWARD no original description	-1.09393	0.75717
11777007	glyma01g06620	moderately similar to ( 250)AT1G69390| Symbols: ATMINE1 | ATMINE1 (ARABIDOPSIS HOMOLOGUE OF BACTERIAL MINE 1); protein binding | chr1:26088384-26089947 FORWARD no original description	1.07766	0.787741
11777012	glyma01g06640	moderately similar to ( 262)AT2G03350| Symbols: | similar to unknown protein [Arabidopsis thaliana] (TAIR:AT3G08890.1); similar to unknown protein [Arabidopsis thaliana] (TAIR:AT3G08890.2); similar to unnamed protein product [Vitis vinifera] (GB:CAO15324.1); contains InterPro domain Protein of unknown function DUF538 (InterPro:IPR007493) | chr2:1019730-1021068 REVERSE no original description	-1.20676	0.582198
11777018	glyma01g06660	moderately similar to ( 292)AT3G29200| Symbols: ATCM1, CM1 | CM1 (chorismate mutase 1); chorismate mutase | chr3:11165819-11167495 REVERSE no original description	1.65973	0.239915
11777029	glyma01g06690	highly similar to ( 764)AT1G69350| Symbols: | pentatricopeptide (PPR) repeat-containing protein | chr1:26073545-26075908 FORWARDvery weakly similar to (86.3)RF1_ORYSA no original description	-1.34163	0.342991
11777031	glyma01g06700	moderately similar to ( 369)AT2G03390| Symbols: | uvrB/uvrC motif-containing protein | chr2:1030632-1032351 REVERSE no original description	-1.33361	0.504992
11777041	glyma01g06720	moderately similar to ( 341)AT5G24090| Symbols: | acidic endochitinase (CHIB1) | chr5:8143808-8145156 REVERSEmoderately similar to ( 349)CHLY_HEVBR no original description	-1.32684	0.110404
11777045	glyma01g06730	highly similar to ( 779)AT1G69340| Symbols: | appr-1-p processing enzyme family protein | chr1:26069961-26073307 FORWARD no original description	-1.09349	0.826348
11777064	glyma01g06740	no original description	-2.41112	0.0443143
11777074	glyma01g06750	weakly similar to ( 132)AT2G03430| Symbols: | ankyrin repeat family protein | chr2:1036189-1037533 REVERSE no original description	-1.10993	0.550028
11777097	glyma01g06810	no original description	-1.10573	0.70726
11777105	glyma01g06820	moderately similar to ( 393)AT1G17020| Symbols: ATSRG1, SRG1 | SRG1 (SENESCENCE-RELATED GENE 1); oxidoreductase, acting on paired donors, with incorporation or reduction of molecular oxygen, 2-oxoglutarate as one donor, and incorporation of one atom each of oxygen into both donors | chr1:5820251-5821734 FORWARDweakly similar to ( 199)LDOX_MALDO no original description	1.05126	0.922089
11777112	glyma01g06840	highly similar to ( 513)AT5G61240| Symbols: | protein binding | chr5:24646711-24649184 FORWARDweakly similar to ( 138)RPK1_IPONI no original description	1.26852	0.100511
11777126	glyma01g06850	no original description	-1.79398	0.106387
11777128	glyma01g06860	moderately similar to ( 298)AT1G13890| Symbols: ATSNAP30, SNAP30 | SNAP30 (synaptosomal-associated protein 30) | chr1:4751578-4752841 FORWARD no original description	-1.26104	0.617698
11777135	glyma01g06880	weakly similar to ( 181)AT1G26610| Symbols: | zinc finger (C2H2 type) family protein | chr1:9193722-9195089 FORWARD no original description	-1.00879	0.98325
11777148	glyma01g06970	highly similar to ( 900)AT3G29360| Symbols: | UDP-glucose 6-dehydrogenase, putative | chr3:11268612-11270054 REVERSEhighly similar to ( 895)UGDH_SOYBN no original description	-1.01457	0.975985
11777152	glyma01g06980	highly similar to ( 639)AT1G26560| Symbols: | glycosyl hydrolase family 1 protein | chr1:9178500-9181713 FORWARDmoderately similar to ( 363)BGLC_MAIZE no original description	1.04708	0.879566
11777165	glyma01g07040	highly similar to ( 621)AT1G26500| Symbols: | pentatricopeptide (PPR) repeat-containing protein | chr1:9158367-9159884 FORWARDvery weakly similar to (97.1)RF1_ORYSA no original description	1.1321	0.573131
11777167	glyma01g07060	highly similar to ( 582)AT3G45400| Symbols: | exostosin family protein | chr3:16662948-16664464 FORWARD no original description	-1.08855	0.875823
11777172	glyma01g07090	highly similar to ( 729)AT1G26460| Symbols: | pentatricopeptide (PPR) repeat-containing protein | chr1:9151803-9154394 FORWARD no original description	-1.16013	0.532136
11777184	glyma01g07110	moderately similar to ( 452)AT1G13820| Symbols: | hydrolase, alpha/beta fold family protein | chr1:4735619-4737614 FORWARD no original description	1.30159	0.185478
11777196	glyma01g07120	highly similar to ( 527)AT2G03530| Symbols: ATUPS2, UPS2 | UPS2 (UREIDE PERMEASE 2) | chr2:1071948-1073519 FORWARDhighly similar to ( 572)UPSA3_VIGUN no original description	-1.39548	0.124474
11777204	glyma01g07130	moderately similar to ( 210)ATCG00720| Symbols: PETB | Encodes the cytochrome b(6) subunit of the cytochrome b6f complex. | chrC:74841-76292 FORWARDmoderately similar to ( 212)CYB6_ATRBE no original description	-1.19442	0.590401
11777206	glyma01g07140	moderately similar to ( 416)AT1G12700| Symbols: | helicase domain-containing protein / pentatricopeptide (PPR) repeat-containing protein | chr1:4322911-4326195 REVERSEmoderately similar to ( 285)RF1_ORYSA no original description	-1.24589	0.0564524
11777209	glyma01g07160	moderately similar to ( 419)AT1G12700| Symbols: | helicase domain-containing protein / pentatricopeptide (PPR) repeat-containing protein | chr1:4322911-4326195 REVERSEmoderately similar to ( 287)RF1_ORYSA no original description	-1.08396	0.928143
11777211	glyma01g07190	moderately similar to ( 408)AT1G13770| Symbols: | similar to unknown protein [Arabidopsis thaliana] (TAIR:AT3G45890.1); similar to unnamed protein product [Vitis vinifera] (GB:CAO41865.1); contains InterPro domain Protein of unknown function DUF647 (InterPro:IPR006968) | chr1:4722240-4724342 FORWARD no original description	1.56539	0.0328434
11777254	glyma01g07400	moderately similar to ( 317)AT2G22070| Symbols: | pentatricopeptide (PPR) repeat-containing protein | chr2:9390682-9393042 FORWARD no original description	-1.15043	0.75395
11777267	glyma01g07460	weakly similar to ( 151)AT3G05950| Symbols: | germin-like protein, putative | chr3:1781136-1781970 REVERSEweakly similar to ( 118)GLP1_MESCR no original description	-1.1217	0.72609
11777270	glyma01g07470	weakly similar to ( 155)AT4G11080| Symbols: | high mobility group (HMG1/2) family protein | chr4:6760894-6763268 REVERSE no original description	-1.35887	0.226952
11777288	glyma01g07560	weakly similar to ( 140)AT3G11945| Symbols: ATHST | ATHST; prenyltransferase | chr3:3780047-3782886 REVERSE no original description	-1.07126	0.856029
11777305	glyma01g07630	no original description	-1.05513	0.858317
11777311	glyma01g07690	highly similar to ( 738)AT5G13210| Symbols: | similar to unknown protein [Arabidopsis thaliana] (TAIR:AT3G24780.1); similar to unknown protein [Arabidopsis thaliana] (TAIR:AT5G43400.1); similar to unnamed protein product [Vitis vinifera] (GB:CAO70061.1); contains InterPro domain von Willebrand factor, type A (InterPro:IPR002035); contains InterPro domain Uncharacterized conserved protein UCP01541…	1.75311	0.0658688
11777315	glyma01g07710	weakly similar to ( 146)AT5G07420| Symbols: | pectinesterase family protein | chr5:2349548-2351367 FORWARD no original description	-1.0473	0.912154
11777323	glyma01g07740	weakly similar to ( 168)POLX_TOBAC no original description	1.19323	0.546796
11777329	glyma01g07750	very weakly similar to (83.2)AT2G13770| Symbols: | similar to ribosomal protein-like [Oryza sativa (japonica cultivar-group)] (GB:BAD37986.1); contains InterPro domain Protein of unknown function DUF635 (InterPro:IPR006912) | chr2:5743685-5744929 FORWARD no original description	1.03837	0.922752
11777337	glyma01g07780	highly similar to ( 611)AT1G69200| Symbols: | kinase | chr1:26019681-26022028 FORWARDweakly similar to ( 172)SCRK1_ORYSA no original description	-3.0993	0.112025
11777343	glyma01g07800	moderately similar to ( 239)AT1G13690| Symbols: ATE1 | ATE1 (ATPase E1); nucleic acid binding | chr1:4693377-4694176 FORWARD no original description	1.04915	0.924737
11777351	glyma01g07850	no original description	1.06339	0.920843
11777367	glyma01g07940	moderately similar to ( 465)AT4G36470| Symbols: | S-adenosyl-L-methionine:carboxyl methyltransferase family protein | chr4:17215131-17216478 REVERSEmoderately similar to ( 221)BAMT_ANTMA no original description	-1.82695	0.100395
11777384	glyma01g08040	highly similar to ( 929)AT4G38440| Symbols: | similar to hypothetical protein [Vitis vinifera] (GB:CAN83259.1); similar to hypothetical protein [Oryza sativa (japonica cultivar-group)] (GB:BAD61853.1); similar to hypothetical protein OsI_022655 [Oryza sativa (indica cultivar-group)] (GB:EAZ01423.1); contains InterPro domain RNA polymerase II-associated protein 1, N-terminal (InterPro:IPR013930); …	-1.3046	0.480473
11777401	glyma01g08060	weakly similar to ( 181)AT1G69170| Symbols: | squamosa promoter-binding protein-like 6 (SPL6) | chr1:26009289-26010704 FORWARDweakly similar to ( 112)LG1_MAIZE no original description	3.55726	0.0608327
11777408	glyma01g08070	moderately similar to ( 323)AT5G60570| Symbols: | kelch repeat-containing F-box family protein | chr5:24365939-24367120 FORWARD no original description	1.09354	0.815629
11777414	glyma01g08080	no original description	1.04812	0.904607
11777442	glyma01g08230	weakly similar to ( 183)AT1G69060| Symbols: | heat shock protein binding | chr1:25968718-25970936 FORWARD no original description	1.74531	0.019295
11777451	glyma01g08250	no original description	-1.00077	0.999207
11777453	glyma01g08260	highly similar to ( 656)AT1G69040| Symbols: ACR4 | ACR4 (ACT REPEAT 4); amino acid binding | chr1:25961506-25963742 FORWARD no original description	1.37617	0.414642
11777488	glyma01g08600	highly similar to ( 520)AT5G22860| Symbols: | serine carboxypeptidase S28 family protein | chr5:7639910-7642948 REVERSE no original description	-5.43002	0.0164921
11777501	glyma01g08690	moderately similar to ( 428)AT1G69940| Symbols: ATPPME1 | ATPPME1; pectinesterase | chr1:26347212-26348634 REVERSEweakly similar to ( 151)PME3_CITSI no original description	-1.27113	0.667554
11777518	glyma01g08730	moderately similar to ( 426)AT1G69940| Symbols: ATPPME1 | ATPPME1; pectinesterase | chr1:26347212-26348634 REVERSEweakly similar to ( 151)PME3_CITSI no original description	1.3418	0.359131
11777526	glyma01g08760	moderately similar to ( 429)AT1G69940| Symbols: ATPPME1 | ATPPME1; pectinesterase | chr1:26347212-26348634 REVERSEweakly similar to ( 149)PME3_CITSI no original description	1.1452	0.747114
11777546	glyma01g09010	moderately similar to ( 284)AT1G69010| Symbols: BIM2 | BIM2 (BES1-INTERACTING MYC-LIKE PROTEIN 2); DNA binding / transcription factor | chr1:25945467-25947262 FORWARD no original description	-1.05326	0.800983
11777585	glyma01g09190	moderately similar to ( 271)AT2G03980| Symbols: | GDSL-motif lipase/hydrolase family protein | chr2:1260904-1262405 FORWARDweakly similar to ( 147)APG_BRANA no original description	1.1638	0.644155
11777600	glyma01g09220	highly similar to ( 621)AT1G11260| Symbols: STP1 | STP1 (SUGAR TRANSPORTER 1); carbohydrate transmembrane transporter/ sugar:hydrogen ion symporter | chr1:3777460-3780133 FORWARDhighly similar to ( 620)STC_RICCO no original description	-1.49219	0.0266811
11777606	glyma01g09270	no original description	-1.01121	0.978475
11777612	glyma01g09290	highly similar to ( 605)AT1G80670| Symbols: | transducin family protein / WD-40 repeat family protein | chr1:30325701-30328435 REVERSE no original description	-1.19183	0.262932
11777626	glyma01g09300	no original description	1.3773	0.381522
11777636	glyma01g09350	moderately similar to ( 407)AT1G69940| Symbols: ATPPME1 | ATPPME1; pectinesterase | chr1:26347212-26348634 REVERSEweakly similar to ( 145)PME_PRUPE no original description	-1.01438	0.979581
11777644	glyma01g09400	moderately similar to ( 305)AT1G68920| Symbols: | basic helix-loop-helix (bHLH) family protein | chr1:25919283-25921338 FORWARD no original description	-1.26892	0.141751
11777669	glyma01g09570	very weakly similar to (82.0)AT3G01410| Symbols: | RNase H domain-containing protein | chr3:153657-155446 REVERSEvery weakly similar to (84.0)RRPO_OENBE no original description	-1.17141	0.220658
11777777	glyma01g10160	moderately similar to ( 475)AT1G13570| Symbols: | F-box family protein | chr1:4642525-4643927 REVERSE no original description	1.73004	0.149888
11777819	glyma01g10390	weakly similar to ( 105)AT5G25830| Symbols: | zinc finger (GATA type) family protein | chr5:9004401-9005505 REVERSE no original description	-1.0223	0.953558
11777823	glyma01g10600	weakly similar to ( 176)AT4G17920| Symbols: | zinc finger (C3HC4-type RING finger) family protein | chr4:9963233-9964102 REVERSE no original description	1.2529	0.278311
11777826	glyma01g10610	moderately similar to ( 300)AT1G32360| Symbols: | zinc finger (CCCH-type) family protein | chr1:11673305-11675142 FORWARD no original description	1.54525	0.0287438
11777848	glyma01g11110	weakly similar to ( 176)AT3G03550| Symbols: | zinc finger (C3HC4-type RING finger) family protein | chr3:850398-851468 REVERSE no original description	-1.0692	0.818352
11777861	glyma01g11390	moderately similar to ( 286)AT4G17900| Symbols: | zinc-binding family protein | chr4:9946826-9947710 FORWARD no original description	1.21273	0.569405
11777876	glyma01g11670	very weakly similar to (91.3)AT3G18990| Symbols: REM39, VRN1 | VRN1 (REDUCED VERNALIZATION RESPONSE 1) | chr3:6549083-6551574 REVERSE no original description	1.2496	0.468526
11777880	glyma01g11870	weakly similar to ( 142)ITRA_SOYBN no original description	-3.82538	0.0303234
11777893	glyma01g12110	weakly similar to ( 147)AT4G30610| Symbols: SCPL24, BRS1 | BRS1 (BRI1 SUPPRESSOR 1) | chr4:14944225-14948397 FORWARDvery weakly similar to (94.4)CBP21_HORVU no original description	-1.13456	0.731031
11777905	glyma01g12340	moderately similar to ( 452)AT4G17890| Symbols: AGD8 | AGD8 (ARF-GAP DOMAIN 8); DNA binding | chr4:9937134-9939001 FORWARD no original description	1.69584	0.136575
11777916	glyma01g12950	no original description	-1.45319	0.103971
11777929	glyma01g12970	moderately similar to ( 244)AT4G17870| Symbols: | similar to unknown protein [Arabidopsis thaliana] (TAIR:AT5G46790.1); similar to Streptomyces cyclase/dehydrase family protein [Brassica oleracea] (GB:ABD65175.1); contains InterPro domain Streptomyces cyclase/dehydrase (InterPro:IPR005031) | chr4:9928805-9929380 FORWARD no original description	-1.05608	0.769496
11777933	glyma01g13170	moderately similar to ( 415)AT5G46800| Symbols: BOU | BOU (A BOUT DE SOUFFLE); binding | chr5:19006006-19007037 REVERSE no original description	1.24587	0.322872
11777950	glyma01g13400	weakly similar to ( 172)AT5G16800| Symbols: | GCN5-related N-acetyltransferase (GNAT) family protein | chr5:5524723-5526298 REVERSE no original description	-1.05721	0.8318
11777955	glyma01g13430	highly similar to ( 521)AT2G44950| Symbols: HUB1 | HUB1 (HISTONE MONO-UBIQUITINATION 1); protein binding / ubiquitin-protein ligase/ zinc ion binding | chr2:18549677-18555322 REVERSE no original description	-1.13835	0.527764
11777972	glyma01g13450	no original description	-1.02953	0.798865
11777993	glyma01g13930	highly similar to ( 607)AT1G02060| Symbols: | pentatricopeptide (PPR) repeat-containing protein | chr1:360918-363050 REVERSEweakly similar to ( 155)RF1_ORYSA no original description	-1.35746	0.296459
11777997	glyma01g13960	very weakly similar to (90.5)AT5G20570| Symbols: HRT1, ROC1, RBX1 | RBX1 (RING-BOX 1) | chr5:6956907-6958223 REVERSE no original description	1.27967	0.337894
11778014	glyma01g14480	no original description	-2.00396	0.114942
11778021	glyma01g14490	very weakly similar to (90.1)AT5G33406| Symbols: | hAT dimerisation domain-containing protein | chr5:12693688-12695633 REVERSE no original description	1.01794	0.977195
11778032	glyma01g15840	weakly similar to ( 156)AT1G22910| Symbols: | RNA recognition motif (RRM)-containing protein | chr1:8105797-8107938 FORWARD no original description	1.23946	0.498892
11778040	glyma01g15910	no original description	4.95553	0.0419261
11778043	glyma01g16360	weakly similar to ( 141)AT5G54980| Symbols: | integral membrane family protein | chr5:22333025-22333786 FORWARD no original description	3.0131	0.0496796
11778056	glyma01g16600	weakly similar to ( 119)AT1G43760| Symbols: | similar to unknown protein [Arabidopsis thaliana] (TAIR:AT1G40390.1); similar to putative AP endonuclease/reverse transcriptase [Brassica napus] (GB:AAM82604.1); contains InterPro domain RNA-directed DNA polymerase (reverse transcriptase), related (InterPro:IPR015706); contains InterPro domain Endonuclease/exonuclease/phosphatase (InterPro:IPR005135) …	-1.02457	0.898465
11778086	glyma01g16610	highly similar to ( 937)AT3G01380| Symbols: | phosphatidylinositolglycan class N (PIG-N) family protein | chr3:144295-149835 REVERSE no original description	1.01796	0.823024
11778097	glyma01g17230	no original description	-1.0305	0.84734
11778101	glyma01g17240	moderately similar to ( 253)AT3G60720| Symbols: | receptor-like protein kinase-related | chr3:22453010-22454583 FORWARD no original description	-1.15934	0.669328
11778112	glyma01g17300	weakly similar to ( 125)AT3G60690| Symbols: | auxin-responsive family protein | chr3:22446237-22446749 FORWARD no original description	1.03887	0.872708
11778116	glyma01g17340	no original description	-1.21411	0.644426
11778121	glyma01g17350	moderately similar to ( 400)AT3G60680| Symbols: | similar to unknown protein [Arabidopsis thaliana] (TAIR:AT2G45260.1); similar to unnamed protein product [Vitis vinifera] (GB:CAO24509.1); contains InterPro domain Protein of unknown function DUF641, plant (InterPro:IPR006943) | chr3:22441221-22442720 FORWARD no original description	1.34612	0.0171366
11778124	glyma01g17360	weakly similar to ( 159)AT3G51690| Symbols: | DNA helicase homolog PIF1. | chr3:19187710-19189086 REVERSE no original description	-1.18739	0.664215
11778145	glyma01g17850	highly similar to ( 947)AT1G79600| Symbols: | ABC1 family protein | chr1:29954998-29957409 REVERSE no original description	1.39309	0.163227
11778159	glyma01g17870	moderately similar to ( 305)AT5G51170| Symbols: | similar to hypothetical protein [Vitis vinifera] (GB:CAN70131.1); contains domain PTHR13522 (PTHR13522) | chr5:20811272-20812556 REVERSE no original description	1.52071	0.0133268
11778174	glyma01g18100	moderately similar to ( 395)AT4G00150| Symbols: | scarecrow-like transcription factor 6 (SCL6) | chr4:57429-59105 REVERSEweakly similar to ( 127)GAI1_VITVI no original description	-1.56202	0.0980812
11778181	glyma01g18300	no original description	1.11169	0.604334
11778196	glyma01g18760	weakly similar to ( 166)AT4G38180| Symbols: FRS5 | FRS5 (FAR1-RELATED SEQUENCE 5); zinc ion binding | chr4:17906696-17909398 REVERSE no original description	-1.20299	0.641203
11778201	glyma01g18780	weakly similar to ( 184)AT1G17880| Symbols: | nascent polypeptide-associated complex (NAC) domain-containing protein / BTF3b-like transcription factor, putative | chr1:6152565-6153418 REVERSE no original description	-1.53814	0.161137
11778206	glyma01g18980	moderately similar to ( 240)AT3G12160| Symbols: AtRABA4d | AtRABA4d (Arabidopsis Rab GTPase homolog A4d); GTP binding | chr3:3879502-3880444 REVERSEmoderately similar to ( 214)RGP1_ORYSA no original description	1.07047	0.821655
11778210	glyma01g19400	no original description	1.29074	0.283577
11778224	glyma01g20230	moderately similar to ( 204)AT1G13380| Symbols: | similar to unknown protein [Arabidopsis thaliana] (TAIR:AT4G27435.1); similar to unnamed protein product [Vitis vinifera] (GB:CAO42142.1); contains InterPro domain Protein of unknown function DUF1218 (InterPro:IPR009606) | chr1:4589215-4590359 REVERSE no original description	1.17424	0.314757
11778230	glyma01g20430	very weakly similar to (94.4)AT4G23160| Symbols: | protein kinase family protein | chr4:12129496-12134097 FORWARDweakly similar to ( 111)POLX_TOBAC no original description	1.11894	0.499403
11778240	glyma01g20460	nearly identical (1298)AT1G68560| Symbols: ATXYL1, XYL1 | ATXYL1/XYL1 (ALPHA-XYLOSIDASE 1); alpha-N-arabinofuranosidase/ hydrolase, hydrolyzing O-glycosyl compounds / xylan 1,4-beta-xylosidase | chr1:25738098-25741560 REVERSEhighly similar to ( 759)AGLU_ORYSA no original description	-3.0649	0.0411324
11778247	glyma01g20680	weakly similar to ( 113)ATMG00860| Symbols: ORF158 | hypothetical protein | chrM:235916-236392 FORWARDweakly similar to ( 141)RRPO_OENBE no original description	-1.16571	0.708014
11778254	glyma01g20740	moderately similar to ( 366)AT1G13635| Symbols: | methyladenine glycosylase family protein | chr1:4674245-4675781 FORWARD no original description	-2.90823	0.0484745
11778271	glyma01g20840	moderately similar to ( 300)AT2G25760| Symbols: | protein kinase family protein | chr2:10992196-10995730 REVERSE no original description	1.08729	0.806482
11778288	glyma01g20870	moderately similar to ( 257)AT1G13330| Symbols: | similar to unnamed protein product [Vitis vinifera] (GB:CAO42122.1); contains InterPro domain Tat binding protein 1-interacting (InterPro:IPR010776) | chr1:4568005-4569407 FORWARD no original description	1.23208	0.415797
11778299	glyma01g20900	moderately similar to ( 217)AT1G68290| Symbols: ENDO 2 | ENDO 2 (ENDONUCLEASE 2); T/G mismatch-specific endonuclease/ endonuclease/ nucleic acid binding / single-stranded DNA specific endodeoxyribonuclease | chr1:25600381-25601927 FORWARD no original description	1.15515	0.668628
11778318	glyma01g20970	no original description	1.05695	0.882975
11778328	glyma01g21010	moderately similar to ( 217)AT1G68640| Symbols: PAN | PAN (PERIANTHIA); DNA binding / transcription factor | chr1:25773402-25775966 REVERSEmoderately similar to ( 202)HBP1C_WHEAT no original description	-1.19002	0.675308
11778334	glyma01g21020	no original description	1.0981	0.880041
11778342	glyma01g21220	no original description	1.15746	0.665692
11778356	glyma01g21270	moderately similar to ( 425)AT1G25500| Symbols: | choline transporter-related | chr1:8955424-8957281 REVERSE no original description	-1.71452	0.0417464
11778377	glyma01g21480	highly similar to ( 536)AT1G25510| Symbols: | aspartyl protease family protein | chr1:8959359-8960810 REVERSE no original description	1.0284	0.922437
11778382	glyma01g21500	moderately similar to ( 226)AT1G68660| Symbols: | similar to unknown [Populus trichocarpa] (GB:ABK92624.1); contains InterPro domain Ribosomal protein L7/L12, C-terminal/adaptor protein ClpS-like (InterPro:IPR014719); contains InterPro domain Adaptor protein ClpS, core (InterPro:IPR003769) | chr1:25781721-25782746 REVERSE no original description	1.05076	0.784669
11778387	glyma01g21510	moderately similar to ( 351)AT1G25530| Symbols: | lysine and histidine specific transporter, putative | chr1:8964814-8967378 REVERSE no original description	-1.98942	0.0361821
11778401	glyma01g21530	no original description	-1.14089	0.830648
11778415	glyma01g21660	highly similar to ( 617)AT5G15550| Symbols: | transducin family protein / WD-40 repeat family protein | chr5:5059318-5062006 REVERSE no original description	-1.50753	0.0603717
11778434	glyma01g21680	very weakly similar to (80.5)AT4G29090| Symbols: | reverse transcriptase, putative / RNA-dependent DNA polymerase, putative | chr4:14333534-14335261 FORWARD no original description	1.14073	0.196114
11778445	glyma01g21710	weakly similar to ( 128)AT1G43760| Symbols: | similar to unknown protein [Arabidopsis thaliana] (TAIR:AT1G40390.1); similar to putative AP endonuclease/reverse transcriptase [Brassica napus] (GB:AAM82604.1); contains InterPro domain RNA-directed DNA polymerase (reverse transcriptase), related (InterPro:IPR015706); contains InterPro domain Endonuclease/exonuclease/phosphatase (InterPro:IPR005135) …	1.11065	0.0289117
11778479	glyma01g21900	moderately similar to ( 217)AT1G68670| Symbols: | myb family transcription factor | chr1:25786007-25787536 FORWARD no original description	-1.3989	0.167584
11778496	glyma01g22160	moderately similar to ( 236)AT1G13280| Symbols: AOC4 | AOC4 (ALLENE OXIDE CYCLASE 4) | chr1:4547621-4548549 FORWARD no original description	1.25992	0.136072
11778501	glyma01g22170	moderately similar to ( 365)AT1G13270| Symbols: MAP1B, MAP1C | MAP1C (METHIONINE AMINOPEPTIDASE 1B); metalloexopeptidase | chr1:4544996-4547152 FORWARD no original description	-2.31418	0.0250471
11778511	glyma01g22180	weakly similar to ( 143)AT1G13270| Symbols: MAP1B, MAP1C | MAP1C (METHIONINE AMINOPEPTIDASE 1B); metalloexopeptidase | chr1:4544996-4547152 FORWARD no original description	-2.25092	0.0562174
11778521	glyma01g22200	no original description	-1.04187	0.922346
11778544	glyma01g22250	very weakly similar to (94.4)AT4G23160| Symbols: | protein kinase family protein | chr4:12129496-12134097 FORWARDweakly similar to ( 112)POLX_TOBAC no original description	1.378	0.623645
11778546	glyma01g22260	moderately similar to ( 372)AT1G25560| Symbols: | AP2 domain-containing transcription factor, putative | chr1:8981878-8982963 REVERSE no original description	-1.5822	0.0721523
11778550	glyma01g22470	moderately similar to ( 399)AT1G25570| Symbols: | leucine-rich repeat protein-related | chr1:8992170-8995417 REVERSE no original description	-2.51441	0.0113181
11778562	glyma01g22510	moderately similar to ( 451)AT1G25580| Symbols: ANAC008 | ANAC008 (Arabidopsis NAC domain containing protein 8); transcription factor | chr1:8997051-8999587 REVERSE no original description	1.78804	0.0228193
11778569	glyma01g22530	moderately similar to ( 238)AT1G68810| Symbols: | basic helix-loop-helix (bHLH) family protein | chr1:25864952-25866545 FORWARD no original description	-1.0654	0.897408
11778589	glyma01g22580	weakly similar to ( 196)AT5G63690| Symbols: | similar to hypothetical protein [Vitis vinifera] (GB:CAN67844.1); similar to unnamed protein product [Vitis vinifera] (GB:CAO22434.1); contains InterPro domain Nucleic acid-binding, OB-fold (InterPro:IPR012340); contains InterPro domain Nucleic acid-binding, OB-fold-like (InterPro:IPR016027) | chr5:25510090-25510509 REVERSE no original description	-1.07945	0.420474
11778597	glyma01g22620	highly similar to ( 976)AT3G25690| Symbols: CHUP1 | CHUP1 (CHLOROPLAST UNUSUAL POSITIONING 1) | chr3:9355298-9358994 FORWARD no original description	-2.43653	0.016722
11778608	glyma01g22630	moderately similar to ( 325)AT3G25680| Symbols: | similar to unknown protein [Arabidopsis thaliana] (TAIR:AT5G23890.1); similar to unnamed protein product [Vitis vinifera] (GB:CAO42077.1); contains InterPro domain S-layer homology region (InterPro:IPR001119) | chr3:9350930-9353495 FORWARD no original description	-1.18895	0.155168
11778629	glyma01g22650	moderately similar to ( 245)AT1G26100| Symbols: | cytochrome B561 family protein | chr1:9022703-9024068 REVERSE no original description	-1.11663	0.828817
11778634	glyma01g22680	moderately similar to ( 207)AT1G26110| Symbols: | similar to unknown protein [Arabidopsis thaliana] (TAIR:AT5G45330.1); similar to hypothetical protein [Glycine max] (GB:BAB41197.1); contains domain PTHR13586 (PTHR13586) | chr1:9024603-9027543 REVERSE no original description	-1.21343	0.325451
11778644	glyma01g22690	no original description	1.33422	0.268199
11778660	glyma01g22800	moderately similar to ( 241)AT3G25640| Symbols: | similar to unknown protein [Arabidopsis thaliana] (TAIR:AT5G23100.1); similar to unnamed protein product [Vitis vinifera] (GB:CAO42071.1); contains InterPro domain Protein of unknown function DUF617, plant (InterPro:IPR006460) | chr3:9335012-9335815 FORWARD no original description	1.31994	0.244442
11778662	glyma01g22830	weakly similar to ( 155)AT1G68760| Symbols: ATNUDT1 | ATNUDT1 (Arabidopsis thaliana Nudix hydrolase homolog 1); dihydroneopterin triphosphate pyrophosphohydrolase/ hydrolase | chr1:25832753-25833270 FORWARD no original description	2.63049	0.0340692
11778670	glyma01g22880	highly similar to ( 657)AT5G13930| Symbols: CHS, TT4, ATCHS | ATCHS/CHS/TT4 (CHALCONE SYNTHASE); naringenin-chalcone synthase | chr5:4488764-4490037 FORWARDhighly similar to ( 774)CHS6_SOYBN no original description	1.38931	0.567126
11778692	glyma01g23000	very weakly similar to (90.1)AT2G01050| Symbols: | nucleic acid binding / zinc ion binding | chr2:68337-69884 REVERSE no original description	1.21821	0.585977
11778704	glyma01g23040	no original description	-1.26105	0.522739
11778708	glyma01g23060	moderately similar to ( 385)AT1G68720| Symbols: | cytidine/deoxycytidylate deaminase family protein | chr1:25808210-25812483 FORWARD no original description	-1.42274	0.113736
11778726	glyma01g23180	highly similar to ( 613)AT1G26150| Symbols: | protein kinase | chr1:9039777-9042860 REVERSEmoderately similar to ( 269)PSKR_DAUCA no original description	-1.22946	0.209725
11778739	glyma01g23210	weakly similar to ( 193)AT1G26160| Symbols: | metal-dependent phosphohydrolase HD domain-containing protein | chr1:9044771-9046932 REVERSE no original description	-1.66916	0.171332
11778748	glyma01g23230	moderately similar to ( 360)AT3G24140| Symbols: FMA | FMA (FAMA); DNA binding / transcription activator/ transcription factor | chr3:8715532-8717779 REVERSE no original description	-1.66775	0.214635
11778753	glyma01g23240	no original description	1.20757	0.328528
11778782	glyma01g23350	weakly similar to ( 198)AT1G26170| Symbols: | protein transporter | chr1:9047526-9054425 REVERSE no original description	-1.07497	0.610502
11778799	glyma01g23390	moderately similar to ( 364)AT1G26170| Symbols: | protein transporter | chr1:9047526-9054425 REVERSE no original description	-1.44378	0.0494956
11778812	glyma01g23410	weakly similar to ( 167)AT1G26170| Symbols: | protein transporter | chr1:9047526-9054425 REVERSE no original description	-1.1014	0.82401
11778827	glyma01g23470	weakly similar to ( 167)AT1G24620| Symbols: | polcalcin, putative / calcium-binding pollen allergen, putative | chr1:8723879-8724439 REVERSEweakly similar to ( 110)CALM3_PETHY no original description	1.49574	0.061437
11778854	glyma01g23730	weakly similar to ( 102)AT3G10130| Symbols: | SOUL heme-binding family protein | chr3:3131127-3133163 REVERSE no original description	1.34344	0.243429
11778860	glyma01g23740	very weakly similar to (83.6)AT3G01410| Symbols: | RNase H domain-containing protein | chr3:153657-155446 REVERSEvery weakly similar to (82.8)RRPO_OENBE no original description	1.02059	0.957888
11778870	glyma01g23760	weakly similar to ( 119)AT2G22720| Symbols: | similar to unknown protein [Arabidopsis thaliana] (TAIR:AT4G37860.1); similar to unnamed protein product [Vitis vinifera] (GB:CAO41059.1); contains InterPro domain Chromatin SPT2 (InterPro:IPR013256) | chr2:9665262-9667612 FORWARD no original description	1.29278	0.118918
11778896	glyma01g23790	nearly identical (1050)AT4G37870| Symbols: PCK1, PEPCK | PCK1/PEPCK (PHOSPHOENOLPYRUVATE CARBOXYKINASE 1); ATP binding / phosphoenolpyruvate carboxykinase (ATP) | chr4:17802968-17806326 REVERSEnearly identical (1012)PEPCK_MAIZE no original description	-1.1418	0.711327
11778909	glyma01g23820	highly similar to ( 510)AT3G49640| Symbols: | FAD binding / catalytic/ tRNA dihydrouridine synthase | chr3:18411465-18413578 REVERSE no original description	1.28853	0.166903
11778926	glyma01g23870	moderately similar to ( 389)AT2G22680| Symbols: | zinc finger (C3HC4-type RING finger) family protein | chr2:9652513-9654564 FORWARD no original description	1.95886	0.0681687
11778931	glyma01g23880	weakly similar to ( 126)AT4G00230| Symbols: XSP1 | XSP1 (XYLEM SERINE PEPTIDASE 1); subtilase | chr4:93935-97289 FORWARD no original description	1.00253	0.996689
11778939	glyma01g24090	moderately similar to ( 228)AT4G23160| Symbols: | protein kinase family protein | chr4:12129496-12134097 FORWARDmoderately similar to ( 286)POLX_TOBAC no original description	1.00143	0.997041
11778943	glyma01g24100	moderately similar to ( 387)AT5G65670| Symbols: IAA9 | IAA9 (indoleacetic acid-induced protein 9); transcription factor | chr5:26271689-26273360 FORWARDmoderately similar to ( 210)IAA30_ORYSA no original description	-1.6622	0.0251752
11778958	glyma01g24150	highly similar to ( 546)AT2G28930| Symbols: APK1B | APK1B (Arabidopsis protein kinase 1B); kinase | chr2:12431628-12433642 FORWARDmoderately similar to ( 237)NORK_MEDTR no original description	-1.07747	0.781537
11778972	glyma01g24360	moderately similar to ( 392)AT5G02230| Symbols: | haloacid dehalogenase-like hydrolase family protein | chr5:449130-450505 FORWARD no original description	7.14209	0.0195642
11778997	glyma01g24510	highly similar to ( 800)AT2G37840| Symbols: | protein kinase family protein | chr2:15860186-15863125 FORWARDweakly similar to ( 156)CIPK1_ORYSA no original description	1.46979	0.0285314
11779014	glyma01g24550	very weakly similar to (92.0)AT4G09550| Symbols: | similar to unknown protein [Arabidopsis thaliana] (TAIR:AT1G73790.1); similar to unknown [Populus trichocarpa] (GB:ABK92804.1) | chr4:6039703-6039918 FORWARD no original description	1.33325	0.0153124
11779019	glyma01g24570	moderately similar to ( 362)AT2G37680| Symbols: | similar to hypothetical protein [Vitis vinifera] (GB:CAN77671.1) | chr2:15810578-15812593 REVERSE no original description	-1.11977	0.492735
11779041	glyma01g24670	highly similar to ( 686)AT3G55550| Symbols: | lectin protein kinase, putative | chr3:20610998-20613052 REVERSEmoderately similar to ( 203)PSKR_DAUCA no original description	1.26934	0.557151
11779103	glyma01g24900	weakly similar to ( 187)AT3G53850| Symbols: | Identical to UPF0497 membrane protein At3g53850 [Arabidopsis Thaliana] (GB:Q945M8;GB:Q9M341); similar to integral membrane protein, putative [Arabidopsis thaliana] (TAIR:AT5G02060.1); similar to unnamed protein product [Vitis vinifera] (GB:CAO15702.1); contains InterPro domain Protein of unknown function DUF588 (InterPro:IPR006702) | chr3:19959240-199…	-1.49955	0.124379
11779119	glyma01g24980	very weakly similar to (84.3)AT5G13160| Symbols: PBS1 | PBS1 (AVRPPHB SUSCEPTIBLE 1); kinase | chr5:4176857-4179685 FORWARD no original description	-1.08299	0.8925
11779132	glyma01g25010	highly similar to ( 640)AT1G55510| Symbols: BCDH BETA1 | BCDH BETA1 (BRANCHED-CHAIN ALPHA-KETO ACID DECARBOXYLASE E1 BETA SUBUNIT); 3-methyl-2-oxobutanoate dehydrogenase (2-methylpropanoyl-transferring) | chr1:20727148-20729171 FORWARDmoderately similar to ( 202)ODPB_PEA no original description	1.40557	0.482901
11779148	glyma01g25040	moderately similar to ( 493)AT3G09350| Symbols: | armadillo/beta-catenin repeat family protein | chr3:2871716-2873115 FORWARD no original description	1.41659	0.182728
11779161	glyma01g25270	highly similar to ( 629)AT4G23980| Symbols: ARF9 | ARF9 (AUXIN RESPONSE FACTOR 9) | chr4:12451602-12454747 FORWARD no original description	1.09755	0.722775
11779182	glyma01g25690	highly similar to ( 597)AT1G18870| Symbols: ICS2 | ICS2; isochorismate synthase | chr1:6515737-6519167 FORWARDhighly similar to ( 612)ICS_CATRO no original description	-2.80035	0.0336787
11779203	glyma01g25710	moderately similar to ( 333)AT5G02030| Symbols: HB-6, RPL, PNY, BLR, BLH9, VAN, LSN | LSN (LARSON); DNA binding / transcription factor | chr5:395751-398869 FORWARD no original description	-1.24349	0.127122
11779218	glyma01g25750	weakly similar to ( 122)AT3G56870| Symbols: | similar to unnamed protein product [Vitis vinifera] (GB:CAO61177.1) | chr3:21064056-21066497 FORWARD no original description	-1.26423	0.408403
11779258	glyma01g25890	highly similar to ( 803)AT3G53960| Symbols: | proton-dependent oligopeptide transport (POT) family protein | chr3:19989284-19991864 REVERSE no original description	5.21044	0.0550386
11779272	glyma01g25970	no original description	-1.48808	0.0521798
11779274	glyma01g25980	no original description	1.01319	0.973267
11779278	glyma01g26010	highly similar to ( 534)AT5G02010| Symbols: ATROPGEF7, ROPGEF7 | ATROPGEF7/ROPGEF7 (KINASE PARTNER PROTEIN-LIKE); Rho guanyl-nucleotide exchange factor/ | chr5:383490-385695 FORWARD no original description	1.45955	0.0696738
11779299	glyma01g26300	moderately similar to ( 249)AT3G53990| Symbols: | universal stress protein (USP) family protein | chr3:20000636-20001997 REVERSE no original description	1.03534	0.924548
11779311	glyma01g26360	weakly similar to ( 105)AT2G26975| Symbols: | copper transporter, putative | chr2:11520070-11520507 FORWARD no original description	-1.51676	0.0420944
11779315	glyma01g26570	weakly similar to ( 144)AT5G59720| Symbols: | HSP18.2 (HEAT SHOCK PROTEIN 18.2) | chr5:24079858-24080343 FORWARDweakly similar to ( 147)HSP11_SOYBN no original description	-1.00716	0.980633
11779319	glyma01g26580	highly similar to ( 516)AT5G33370| Symbols: | GDSL-motif lipase/hydrolase family protein | chr5:12620094-12621900 REVERSEweakly similar to ( 139)APG_BRANA no original description	-1.04982	0.920068
11779326	glyma01g26600	moderately similar to ( 264)AT3G09250| Symbols: | DNA binding / nuclease | chr3:2839086-2840300 FORWARD no original description	-1.00005	0.999832
11779338	glyma01g26690	moderately similar to ( 399)AT3G54030| Symbols: | protein kinase family protein | chr3:20022140-20024468 FORWARD no original description	-1.20674	0.676509
11779356	glyma01g26700	highly similar to ( 508)AT3G54020| Symbols: | phosphatidic acid phosphatase-related / PAP2-related | chr3:20017076-20018998 FORWARD no original description	1.86217	0.0555828
11779378	glyma01g26740	moderately similar to ( 276)AT3G23330| Symbols: | pentatricopeptide (PPR) repeat-containing protein | chr3:8347207-8349354 FORWARD no original description	-1.1876	0.451983
11779386	glyma01g26750	highly similar to ( 666)AT3G09220| Symbols: LAC7 | LAC7 (laccase 7); copper ion binding / oxidoreductase | chr3:2827440-2830483 REVERSEmoderately similar to ( 212)ASO_CUCSA no original description	1.29731	0.0854249
11779409	glyma01g26830	very weakly similar to (96.7)AT1G11755| Symbols: | transferase | chr1:3969987-3971488 REVERSE no original description	-1.08814	0.616638
11779414	glyma01g26840	weakly similar to ( 188)AT3G54040| Symbols: | photoassimilate-responsive protein-related | chr3:20025010-20026277 REVERSE no original description	3.13735	0.0151323
11779425	glyma01g26950	highly similar to ( 868)AT5G62700| Symbols: ATGCP3, TUB3 | TUB3 (TUBULIN BETA-3); structural molecule | chr5:25201727-25203652 FORWARDhighly similar to ( 872)TBB2_SOYBN no original description	-1.20269	0.0655927
11779434	glyma01g26980	very weakly similar to (90.1)AT2G37975| Symbols: | similar to unknown protein [Arabidopsis thaliana] (TAIR:AT3G54085.1); similar to hypothetical protein [Oryza sativa (indica cultivar-group)] (GB:ABR25323.1); contains InterPro domain Yos1-like (InterPro:IPR013880) | chr2:15898978-15899214 REVERSE no original description	2.21012	0.0317843
11779438	glyma01g27000	highly similar to ( 702)AT2G37980| Symbols: | similar to unknown protein [Arabidopsis thaliana] (TAIR:AT5G01100.1); similar to unknown protein [Arabidopsis thaliana] (TAIR:AT3G54100.1); similar to unnamed protein product [Vitis vinifera] (GB:CAO15763.1); similar to hypothetical protein [Vitis vinifera] (GB:CAN72579.1); contains InterPro domain Protein of unknown function DUF246, plant (InterPro:I…	4.2716	0.0135269
11779452	glyma01g27020	weakly similar to ( 140)AT2G29880| Symbols: | Identical to Uncharacterized protein At2g29880 [Arabidopsis Thaliana] (GB:O82368;GB:Q1PEY9); similar to unknown protein [Arabidopsis thaliana] (TAIR:AT5G27260.1); similar to hypothetical protein [Vitis vinifera] (GB:CAN74698.1) | chr2:12749613-12750622 FORWARD no original description	1.16379	0.737782
11779455	glyma01g27040	moderately similar to ( 246)AT5G01150| Symbols: | similar to unknown protein [Arabidopsis thaliana] (TAIR:AT5G01130.1); similar to unnamed protein product [Vitis vinifera] (GB:CAO64803.1); contains InterPro domain Protein of unknown function DUF674 (InterPro:IPR007750) | chr5:51987-53648 FORWARD no original description	1.35199	0.222242
11779463	glyma01g27060	moderately similar to ( 464)AT1G76340| Symbols: | integral membrane family protein | chr1:28640082-28641200 REVERSE no original description	-1.12544	0.657568
11779474	glyma01g27130	weakly similar to ( 148)AT3G54120| Symbols: | reticulon family protein (RTNLB12) | chr3:20052247-20053111 REVERSE no original description	-1.68237	0.0486366
11779481	glyma01g27170	moderately similar to ( 213)AT5G57230| Symbols: | similar to unknown [Populus trichocarpa x Populus deltoides] (GB:ABK96632.1); contains InterPro domain Thioredoxin-like fold (InterPro:IPR012336) | chr5:23207798-23208711 FORWARD no original description	-1.20495	0.69363
11779489	glyma01g27200	moderately similar to ( 325)AT3G54130| Symbols: | josephin family protein | chr3:20053873-20055407 REVERSEmoderately similar to ( 311)ATX3_ORYSA no original description	1.48029	0.0543215
11779494	glyma01g27210	weakly similar to ( 162)AT2G38025| Symbols: | similar to OTU-like cysteine protease family protein [Arabidopsis thaliana] (TAIR:AT3G57810.1); similar to OTU-like cysteine protease family protein [Arabidopsis thaliana] (TAIR:AT3G57810.3); similar to OTU-like cysteine protease family protein [Arabidopsis thaliana] (TAIR:AT3G57810.2); similar to unnamed protein product [Vitis vinifera] (GB:CAO15771.…	1.16571	0.832529
11779502	glyma01g27280	weakly similar to ( 116)AT3G09085| Symbols: | similar to unnamed protein product [Vitis vinifera] (GB:CAO15778.1) | chr3:2782243-2782581 FORWARD no original description	1.00165	0.994137
11779506	glyma01g27300	weakly similar to ( 103)AT3G01820| Symbols: | adenylate kinase family protein | chr3:293988-295364 REVERSEvery weakly similar to (82.0)KADC_SOLTU no original description	-1.09817	0.791781
11779530	glyma01g27410	very weakly similar to (86.3)AT2G24940| Symbols: ATMAPR2 | ATMAPR2 (ARABIDOPSIS THALIANA MEMBRANE-ASSOCIATED PROGESTERONE BINDING PROTEIN 2); heme binding / transition metal ion binding | chr2:10616526-10616828 FORWARD no original description	-1.22472	0.62045
11779538	glyma01g27470	highly similar to ( 584)AT3G48520| Symbols: CYP94B3 | CYP94B3 (cytochrome P450, family 94, subfamily B, polypeptide 3); oxygen binding | chr3:17986089-17987609 REVERSEvery weakly similar to (95.5)C72A1_CATRO no original description	1.07593	0.522121
11779540	glyma01g27480	no original description	1.0577	0.871309
11779573	glyma01g27840	highly similar to ( 705)AT5G01220| Symbols: SQD2 | SQD2 (SULFOQUINOVOSYLDIACYLGLYCEROL 2); UDP-sulfoquinovose:DAG sulfoquinovosyltransferase/ transferase, transferring glycosyl groups | chr5:86906-89884 REVERSE no original description	1.02286	0.824865
11779598	glyma01g27900	highly similar to ( 759)AT2G38110| Symbols: ATGPAT6, GPAT6 | ATGPAT6/GPAT6 (GLYCEROL-3-PHOSPHATE ACYLTRANSFERASE 6); 1-acylglycerol-3-phosphate O-acyltransferase/ acyltransferase | chr2:15959894-15962442 REVERSE no original description	-3.6802	0.0531595
11779602	glyma01g27910	moderately similar to ( 246)AT1G55110| Symbols: ATIDD7 | ATIDD7 (ARABIDOPSIS THALIANA INDETERMINATE(ID)-DOMAIN 7); nucleic acid binding / transcription factor/ zinc ion binding | chr1:20564073-20566292 REVERSE no original description	-1.23575	0.503854
11779619	glyma01g27970	moderately similar to ( 449)AT2G45960| Symbols: TMP-A, ATHH2, PIP1;2, PIP1B | PIP1B (plasma membrane intrinsic protein 1;2) | chr2:18917523-18918817 FORWARDmoderately similar to ( 435)PIP11_ORYSA no original description	-1.27148	0.367346
11779638	glyma01g28310	highly similar to ( 527)AT2G38120| Symbols: WAV5, PIR1, MAP1, AUX1 | AUX1 (AUXIN RESISTANT 1); amino acid transmembrane transporter/ transporter | chr2:15980571-15983870 FORWARDhighly similar to ( 567)LAX4_MEDTR no original description	-2.85179	0.00782517
11779653	glyma01g28370	weakly similar to ( 115)AT3G15430| Symbols: | regulator of chromosome condensation (RCC1) family protein | chr3:5209415-5211569 FORWARD no original description	-1.19397	0.638603
11779674	glyma01g28430	weakly similar to ( 108)ATCG01130| Symbols: YCF1.2 | hypothetical protein | chrC:123884-129244 REVERSEweakly similar to ( 140)YCF1_SOYBN no original description	-1.34239	0.260194
11779683	glyma01g28460	moderately similar to ( 273)AT1G61800| Symbols: GPT2 | GPT2 (glucose-6-phosphate/phosphate translocator 2); antiporter/ glucose-6-phosphate transmembrane transporter | chr1:22828192-22830124 FORWARDweakly similar to ( 123)TPT_SOLTU no original description	-1.27724	0.436465
11779699	glyma01g28480	very weakly similar to (92.8)AT3G50160| Symbols: | similar to unknown protein [Arabidopsis thaliana] (TAIR:AT3G50150.1); similar to unnamed protein product [Vitis vinifera] (GB:CAO71911.1); contains InterPro domain Protein of unknown function DUF247, plant (InterPro:IPR004158) | chr3:18609809-18611886 REVERSE no original description	1.19866	0.33144
11779715	glyma01g28510	moderately similar to ( 357)AT3G09020| Symbols: | alpha 1,4-glycosyltransferase family protein / glycosyltransferase sugar-binding DXD motif-containing protein | chr3:2753312-2754547 FORWARD no original description	1.0271	0.952007
11779725	glyma01g28780	very weakly similar to (97.8)AT3G50190| Symbols: | similar to unknown protein [Arabidopsis thaliana] (TAIR:AT3G50140.1); similar to unknown protein [Arabidopsis thaliana] (TAIR:AT3G50130.1); similar to unnamed protein product [Vitis vinifera] (GB:CAO71911.1); contains InterPro domain Protein of unknown function DUF247, plant (InterPro:IPR004158) | chr3:18620147-18622152 REVERSE no original descri…	-1.0749	0.884252
11779730	glyma01g28810	moderately similar to ( 466)AT3G08940| Symbols: LHCB4.2 | LHCB4.2 (LIGHT HARVESTING COMPLEX PSII) | chr3:2717722-2718670 FORWARDmoderately similar to ( 241)CB29_CHLRE no original description	-1.75609	0.0283897
11779735	glyma01g28830	moderately similar to ( 242)AT5G60540| Symbols: EMB2407, ATPDX2, PDX2 | ATPDX2/EMB2407/PDX2 (PYRIDOXINE BIOSYNTHESIS 2); glutaminase/ glutaminyl-tRNA synthase (glutamine-hydrolyzing)/ protein heterodimerization | chr5:24354100-24355873 REVERSE no original description	-1.21844	0.629536
11779743	glyma01g28890	moderately similar to ( 265)AT3G51870| Symbols: | mitochondrial substrate carrier family protein | chr3:19254955-19257588 FORWARD no original description	-1.41755	0.186426
11779767	glyma01g28990	weakly similar to ( 122)AT3G28890| Symbols: | leucine-rich repeat family protein | chr3:10897943-10900078 REVERSEvery weakly similar to (80.9)PSKR_DAUCA no original description	1.0171	0.952214
11779788	glyma01g29030	moderately similar to ( 337)AT1G45616| Symbols: | leucine-rich repeat family protein | chr1:17185990-17188974 REVERSEweakly similar to ( 147)PSKR_DAUCA no original description	2.2003	0.084927
11779820	glyma01g29170	highly similar to ( 689)AT4G21380| Symbols: ARK3 | ARK3 (Arabidopsis Receptor Kinase 3); kinase | chr4:11389230-11393101 REVERSEmoderately similar to ( 337)SLSG3_BRAOL no original description	2.90469	0.0142072
11779830	glyma01g29190	nearly identical (1068)AT5G01320| Symbols: | pyruvate decarboxylase, putative | chr5:129483-131624 REVERSEnearly identical (1035)PDC2_TOBAC no original description	1.0604	0.899081
11779856	glyma01g29280	highly similar to ( 542)AT5G17620| Symbols: | similar to unnamed protein product [Vitis vinifera] (GB:CAO17833.1); contains InterPro domain Plant nuclear matrix 1 (InterPro:IPR010604) | chr5:5805936-5808457 REVERSE no original description	1.52264	0.253795
11779869	glyma01g29320	moderately similar to ( 383)AT4G23160| Symbols: | protein kinase family protein | chr4:12129496-12134097 FORWARDmoderately similar to ( 327)POLX_TOBAC no original description	-1.11789	0.202726
11779884	glyma01g29410	moderately similar to ( 224)AT5G58590| Symbols: RANBP1 | RANBP1 (RAN BINDING PROTEIN 1) | chr5:23697545-23698940 REVERSE no original description	-1.10426	0.63458
11779891	glyma01g29420	highly similar to ( 548)AT3G51800| Symbols: ATG2 | ATG2 (G2p-related protein); metalloexopeptidase | chr3:19222238-19224545 REVERSE no original description	1.06589	0.901001
11779910	glyma01g29480	very weakly similar to (80.1)AT2G40170| Symbols: ATEM6, GEA6 | ATEM6/GEA6 (ARABIDOPSIS EARLY METHIONINE-LABELLED 6) | chr2:16786870-16787245 REVERSEvery weakly similar to (82.8)EMB1_DAUCA no original description	1.09744	0.756232
11779954	glyma01g29720	weakly similar to ( 171)AT5G61820| Symbols: | similar to MtN19-like protein [Pisum sativum] (GB:AAU14999.2); contains InterPro domain Stress up-regulated Nod 19 (InterPro:IPR011692) | chr5:24851731-24853449 REVERSE no original description	1.01159	0.982588
11779967	glyma01g29760	weakly similar to ( 169)AT5G01380| Symbols: | transcription factor | chr5:155783-157450 REVERSE no original description	1.15739	0.292506
11779988	glyma01g29910	weakly similar to ( 132)AT1G79620| Symbols: | leucine-rich repeat transmembrane protein kinase, putative | chr1:29962526-29967067 REVERSE no original description	1.09249	0.859801
11780003	glyma01g29950	moderately similar to ( 304)AT5G05610| Symbols: | PHD finger family protein | chr5:1677332-1678943 REVERSE no original description	1.60342	0.195581
11780011	glyma01g29970	weakly similar to ( 140)AT5G61820| Symbols: | similar to MtN19-like protein [Pisum sativum] (GB:AAU14999.2); contains InterPro domain Stress up-regulated Nod 19 (InterPro:IPR011692) | chr5:24851731-24853449 REVERSE no original description	1.10019	0.670738
11780017	glyma01g29990	moderately similar to ( 248)AT5G61820| Symbols: | similar to MtN19-like protein [Pisum sativum] (GB:AAU14999.2); contains InterPro domain Stress up-regulated Nod 19 (InterPro:IPR011692) | chr5:24851731-24853449 REVERSE no original description	1.06371	0.912827
11780021	glyma01g30020	moderately similar to ( 333)AT5G61820| Symbols: | similar to MtN19-like protein [Pisum sativum] (GB:AAU14999.2); contains InterPro domain Stress up-regulated Nod 19 (InterPro:IPR011692) | chr5:24851731-24853449 REVERSE no original description	1.23367	0.469711
11780025	glyma01g30030	moderately similar to ( 327)AT5G61820| Symbols: | similar to MtN19-like protein [Pisum sativum] (GB:AAU14999.2); contains InterPro domain Stress up-regulated Nod 19 (InterPro:IPR011692) | chr5:24851731-24853449 REVERSE no original description	1.16742	0.580539
11780029	glyma01g30040	moderately similar to ( 278)AT5G61820| Symbols: | similar to MtN19-like protein [Pisum sativum] (GB:AAU14999.2); contains InterPro domain Stress up-regulated Nod 19 (InterPro:IPR011692) | chr5:24851731-24853449 REVERSE no original description	1.14264	0.097894
11780035	glyma01g30050	weakly similar to ( 185)AT5G61820| Symbols: | similar to MtN19-like protein [Pisum sativum] (GB:AAU14999.2); contains InterPro domain Stress up-regulated Nod 19 (InterPro:IPR011692) | chr5:24851731-24853449 REVERSE no original description	1.04002	0.949367
11780041	glyma01g30300	moderately similar to ( 461)AT5G01390| Symbols: | DNAJ heat shock protein, putative | chr5:160499-162198 REVERSEvery weakly similar to (95.1)DNJH_CUCSA no original description	1.18398	0.267131
11780047	glyma01g30320	highly similar to ( 949)AT5G01400| Symbols: ESP4 | ESP4 (ENHANCED SILENCING PHENOTYPE 4); binding | chr5:162802-171071 REVERSE no original description	-1.19261	0.122883
11780090	glyma01g30380	no original description	-1.01993	0.968363
11780095	glyma01g30400	highly similar to ( 656)AT5G01460| Symbols: | LMBR1 integral membrane family protein | chr5:186822-190007 FORWARD no original description	1.34983	0.476888
11780115	glyma01g30470	moderately similar to ( 231)AT1G27090| Symbols: | glycine-rich protein | chr1:9404028-9406085 REVERSE no original description	-1.80665	0.0724333
11780124	glyma01g30530	no original description	-1.02574	0.938426
11780130	glyma01g30560	no original description	1.23041	0.392995
11780148	glyma01g30610	highly similar to ( 541)AT3G51860| Symbols: ATHCX1, CAX1-LIKE, ATCAX3, CAX3 | CAX3 (cation exchanger 3); cation:cation antiporter | chr3:19250435-19253496 FORWARDmoderately similar to ( 478)CAX1A_ORYSA no original description	1.44002	0.192866
11780177	glyma01g30920	highly similar to ( 519)AT2G38290| Symbols: ATAMT2 | ATAMT2 (AMMONIUM TRANSPORTER 2); ammonium transmembrane transporter | chr2:16046750-16049369 REVERSE no original description	-1.51957	0.294036
11780198	glyma01g31230	moderately similar to ( 247)AT5G01580| Symbols: OSH1 | OSH1 (OAS HIGH ACCUMULATION 1); catalytic | chr5:222759-223851 REVERSE no original description	-1.17211	0.674674
11780208	glyma01g31300	moderately similar to ( 276)AT5G01600| Symbols: ATFER1 | ATFER1 (FERRETIN 1); ferric iron binding | chr5:228146-229591 REVERSEmoderately similar to ( 431)FRI2_SOYBN no original description	20.417	0.0136299
11780233	glyma01g31360	moderately similar to ( 421)AT3G22110| Symbols: PAC1 | PAC1 (20S proteasome alpha subunit C1); peptidase | chr3:7792826-7793578 REVERSEmoderately similar to ( 422)PSA4_SPIOL no original description	1.67623	0.0185115
11780255	glyma01g31520	moderately similar to ( 489)AT5G41750| Symbols: | disease resistance protein (TIR-NBS-LRR class), putative | chr5:16711275-16714755 FORWARD no original description	1.04977	0.935856
11780263	glyma01g31550	moderately similar to ( 495)AT5G41750| Symbols: | disease resistance protein (TIR-NBS-LRR class), putative | chr5:16711275-16714755 FORWARD no original description	1.18866	0.392722
11780271	glyma01g31570	moderately similar to ( 235)AT3G08780| Symbols: | similar to unnamed protein product [Vitis vinifera] (GB:CAO48785.1) | chr3:2666520-2667458 REVERSE no original description	1.04635	0.693205
11780279	glyma01g31590	moderately similar to ( 453)AT3G51740| Symbols: IMK2 | IMK2 (INFLORESCENCE MERISTEM RECEPTOR-LIKE KINASE 2); ATP binding / kinase/ protein serine/threonine kinase | chr3:19200227-19202821 FORWARDweakly similar to ( 180)PSKR_DAUCA no original description	1.05559	0.86338
11780284	glyma01g31600	moderately similar to ( 238)AT2G38360| Symbols: | prenylated rab acceptor (PRA1) family protein | chr2:16076918-16077580 REVERSE no original description	-1.00676	0.975722
11780288	glyma01g31610	weakly similar to ( 176)AT5G01650| Symbols: | macrophage migration inhibitory factor family protein / MIF family protein | chr5:242731-244030 REVERSE no original description	-1.01163	0.961065
11780294	glyma01g31630	weakly similar to ( 134)AT3G51660| Symbols: | macrophage migration inhibitory factor family protein / MIF family protein | chr3:19175208-19176055 REVERSE no original description	-1.21598	0.324411
11780301	glyma01g31650	weakly similar to ( 198)AT5G01660| Symbols: | kelch repeat-containing protein | chr5:244501-248142 REVERSEvery weakly similar to (87.0)B2_DAUCA no original description	1.13338	0.734561
11780314	glyma01g31810	no original description	-1.20249	0.582204
11780326	glyma01g31850	moderately similar to ( 336)AT5G36250| Symbols: | protein phosphatase 2C, putative / PP2C, putative | chr5:14299820-14301606 FORWARD no original description	1.6461	0.297513
11780332	glyma01g31860	moderately similar to ( 347)AT3G14470| Symbols: | disease resistance protein (NBS-LRR class), putative | chr3:4857947-4861111 FORWARD no original description	1.03184	0.945353
11780341	glyma01g31870	weakly similar to ( 110)AT4G27750| Symbols: ISI1 | ISI1 (IMPAIRED SUCROSE INDUCTION 1); binding | chr4:13841714-13843507 FORWARD no original description	-1.056	0.895301
11780353	glyma01g31900	highly similar to ( 560)AT5G01710| Symbols: | similar to methyltransferase [Arabidopsis thaliana] (TAIR:AT4G24805.1); similar to unnamed protein product [Vitis vinifera] (GB:CAO48800.1); contains InterPro domain Methyltransferase FkbM (InterPro:IPR006342) | chr5:263706-265247 REVERSE no original description	-1.25915	0.438188
11780358	glyma01g31920	moderately similar to ( 269)AT2G38470| Symbols: ATWRKY33, WRKY33 | WRKY33 (WRKY DNA-binding protein 33); transcription factor | chr2:16115554-16117617 FORWARD no original description	-1.85029	0.174429
11780367	glyma01g31930	highly similar to ( 638)AT5G01720| Symbols: | F-box family protein (FBL3) | chr5:267115-270388 REVERSE no original description	1.2909	0.232235
11780377	glyma01g31940	highly similar to ( 530)AT2G38460| Symbols: | iron transporter-related | chr2:16110681-16113008 FORWARD no original description	-1.28378	0.547121
11780397	glyma01g31970	moderately similar to ( 283)AT2G38460| Symbols: | iron transporter-related | chr2:16110681-16113008 FORWARD no original description	-1.2006	0.745392
11780407	glyma01g31990	weakly similar to ( 120)AT5G05360| Symbols: | binding | chr5:1588357-1589179 FORWARD no original description	1.12346	0.564004
11780415	glyma01g32000	moderately similar to ( 355)AT2G38440| Symbols: SCAR2, DIS3, WAVE4, ITB1 | ITB1 (IRREGULAR TRICHOME BRANCH1) | chr2:16102628-16107929 FORWARDmoderately similar to ( 243)SCRL1_ORYSA no original description	-1.11637	0.243895
11780431	glyma01g32020	moderately similar to ( 331)AT5G05350| Symbols: | similar to unknown protein [Arabidopsis thaliana] (TAIR:AT3G10980.1); similar to unnamed protein product [Vitis vinifera] (GB:CAO41459.1); contains InterPro domain Protein of unknown function Cys-rich (InterPro:IPR006461) | chr5:1585758-1587338 FORWARD no original description	-1.07709	0.866065
11780434	glyma01g32090	highly similar to ( 734)AT3G08860| Symbols: | alanine--glyoxylate aminotransferase, putative / beta-alanine-pyruvate aminotransferase, putative / AGT, putative | chr3:2696760-2699093 REVERSEvery weakly similar to (94.4)GSA_HORVU no original description	2.31653	0.0466044
11780453	glyma01g32120	moderately similar to ( 249)AT5G01780| Symbols: | oxidoreductase, 2OG-Fe(II) oxygenase family protein | chr5:302362-304126 REVERSE no original description	1.12938	0.629762
11780456	glyma01g32140	very weakly similar to (86.3)NLTP_HELAN no original description	1.18139	0.726634
11780458	glyma01g32160	very weakly similar to (88.2)AT2G38540| Symbols: LTP1, ATLTP1, LP1 | LP1 (nonspecific lipid transfer protein 1) | chr2:16137496-16137971 FORWARDvery weakly similar to (99.8)NLTP_CICAR no original description	1.09777	0.7338
11780460	glyma01g32180	no original description	1.06307	0.751356
11780469	glyma01g32190	very weakly similar to (81.6)AT5G59320| Symbols: LTP3 | LTP3 (LIPID TRANSFER PROTEIN 3); lipid binding | chr5:23946277-23946718 FORWARDweakly similar to ( 110)NLTP1_PHAAU no original description	1.23262	0.554866
11780494	glyma01g32370	no original description	1.30243	0.313853
11780507	glyma01g32450	moderately similar to ( 413)AT5G58350| Symbols: ZIK2, WNK4 | WNK4 (Arabidopsis WNK kinase 4); kinase | chr5:23602731-23604907 FORWARD no original description	-1.13581	0.49575
11780527	glyma01g32770	very weakly similar to (82.8)AT2G04865| Symbols: | similar to unknown protein [Arabidopsis thaliana] (TAIR:AT2G25010.1); similar to unnamed protein product [Vitis vinifera] (GB:CAO41085.1); contains InterPro domain Protein of unknown function DUF1723 (InterPro:IPR013541) | chr2:1712146-1714596 FORWARD no original description	-1.01533	0.958981
11780535	glyma01g32790	moderately similar to ( 436)AT3G42630| Symbols: | pentatricopeptide (PPR) repeat-containing protein | chr3:14733300-14734621 FORWARD no original description	-1.34328	0.219469
11780540	glyma01g32810	highly similar to ( 679)AT4G32010| Symbols: HSL1, HSI2-L1 | HSI2-L1/HSL1 (HSI2-LIKE 1); transcription factor | chr4:15481237-15484903 FORWARD no original description	-1.28041	0.0925689
11780557	glyma01g32830	weakly similar to ( 127)AT5G01750| Symbols: | Identical to Uncharacterized protein At5g01750 [Arabidopsis Thaliana] (GB:Q9LZX1;GB:Q8LEK9); similar to unknown protein [Arabidopsis thaliana] (TAIR:AT3G11740.1); similar to unnamed protein product [Vitis vinifera] (GB:CAO48825.1); contains InterPro domain Protein of unknown function DUF567 (InterPro:IPR007612) | chr5:290031-291106 FORWARD no original…	1.46763	0.303652
11780565	glyma01g32860	highly similar to ( 763)AT3G56370| Symbols: | leucine-rich repeat transmembrane protein kinase, putative | chr3:20910382-20913369 REVERSEweakly similar to ( 172)NORK_MEDTR no original description	1.03587	0.890048
11780568	glyma01g32870	no original description	3.26242	0.0280581
11780594	glyma01g33070	moderately similar to ( 223)AT2G18950| Symbols: TPT1, ATHPT, HPT, VTE2, HPT1 | HPT1 (HOMOGENTISATE PHYTYLTRANSFERASE 1); prenyltransferase | chr2:8214573-8217129 FORWARD no original description	7.42809	0.0330904
11780615	glyma01g33110	moderately similar to ( 296)AT4G22030| Symbols: | F-box family protein | chr4:11672408-11675587 FORWARD no original description	1.17061	0.690071
11780618	glyma01g33120	weakly similar to ( 115)AT5G24910| Symbols: CYP714A1 | CYP714A1 (cytochrome P450, family 714, subfamily A, polypeptide 1); oxygen binding | chr5:8567677-8570263 REVERSE no original description	-1.28228	0.268725
11780622	glyma01g33130	no original description	1.26033	0.152184
11780624	glyma01g33150	moderately similar to ( 471)AT4G31940| Symbols: CYP82C4 | CYP82C4 (cytochrome P450, family 82, subfamily C, polypeptide 4); oxygen binding | chr4:15452046-15453972 FORWARDnearly identical (1081)C82A4_SOYBN no original description	1.71243	0.128246
11780641	glyma01g33250	moderately similar to ( 233)AT4G00150| Symbols: | scarecrow-like transcription factor 6 (SCL6) | chr4:57429-59105 REVERSEvery weakly similar to (87.8)CIGR1_ORYSA no original description	-1.07997	0.867244
11780648	glyma01g33270	moderately similar to ( 382)AT4G00150| Symbols: | scarecrow-like transcription factor 6 (SCL6) | chr4:57429-59105 REVERSEweakly similar to ( 127)GAI1_VITVI no original description	1.05496	0.922089
11780652	glyma01g33280	moderately similar to ( 203)AT1G49920| Symbols: | zinc finger protein-related | chr1:18485466-18487901 REVERSE no original description	1.11661	0.674674
11780660	glyma01g33370	moderately similar to ( 264)AT2G45190| Symbols: FIL, YAB1, AFO | AFO (ABNORMAL FLORAL ORGANS); transcription factor | chr2:18635524-18637626 REVERSEweakly similar to ( 140)YAB1_ORYSA no original description	1.00572	0.98846
11780669	glyma01g33380	moderately similar to ( 342)AT2G45200| Symbols: ATGOS12, GOS12 | GOS12 (GOLGI SNARE 12); SNARE binding | chr2:18644763-18646714 REVERSE no original description	1.24863	0.444841
11780685	glyma01g33440	highly similar to ( 672)AT2G45220| Symbols: | pectinesterase family protein | chr2:18651355-18653468 REVERSEhighly similar to ( 677)PME2_CITSI no original description	1.11588	0.817008
11780690	glyma01g33480	highly similar to ( 688)AT2G45220| Symbols: | pectinesterase family protein | chr2:18651355-18653468 REVERSEhighly similar to ( 711)PME2_CITSI no original description	1.09479	0.767984
11780695	glyma01g33510	weakly similar to ( 147)AT3G22520| Symbols: | similar to unknown protein [Arabidopsis thaliana] (TAIR:AT4G14840.1); similar to unnamed protein product [Vitis vinifera] (GB:CAO71183.1) | chr3:7974991-7977413 FORWARD no original description	1.00512	0.992005
11780704	glyma01g33560	weakly similar to ( 146)AT4G00080| Symbols: UNE11 | UNE11 (unfertilized embryo sac 11); pectinesterase inhibitor | chr4:32946-33575 FORWARDweakly similar to ( 110)21KD_DAUCA no original description	1.17603	0.479293
11780706	glyma01g33570	very weakly similar to (82.8)AT4G12390| Symbols: PME1 | PME1; pectinesterase inhibitor | chr4:7336550-7337170 FORWARD no original description	-1.0105	0.975282
11780711	glyma01g33580	weakly similar to ( 109)AT4G00080| Symbols: UNE11 | UNE11 (unfertilized embryo sac 11); pectinesterase inhibitor | chr4:32946-33575 FORWARDvery weakly similar to (85.5)21KD_DAUCA no original description	-1.07471	0.857291
11780715	glyma01g33590	weakly similar to ( 114)AT5G65830| Symbols: | leucine-rich repeat family protein | chr5:26359622-26360461 REVERSE no original description	-1.04606	0.792548
11780718	glyma01g33600	highly similar to ( 649)AT2G45260| Symbols: | similar to unknown protein [Arabidopsis thaliana] (TAIR:AT4G34080.1); similar to unnamed protein product [Vitis vinifera] (GB:CAO24521.1); contains InterPro domain Protein of unknown function DUF641, plant (InterPro:IPR006943) | chr2:18671735-18673012 REVERSE no original description	1.08357	0.559027
11780728	glyma01g33650	highly similar to ( 769)AT4G00110| Symbols: GAE3 | GAE3 (UDP-D-GLUCURONATE 4-EPIMERASE 3); catalytic | chr4:38702-39994 REVERSEweakly similar to ( 102)GALE1_PEA no original description	-1.0187	0.940862
11780731	glyma01g33660	highly similar to ( 680)AT2G45300| Symbols: | 3-phosphoshikimate 1-carboxyvinyltransferase / 5-enolpyruvylshikimate-3-phosphate / EPSP synthase | chr2:18684592-18686942 FORWARDhighly similar to ( 713)AROA_PETHY no original description	-1.40562	0.0791671
11780744	glyma01g33680	moderately similar to ( 341)AT3G13440| Symbols: | similar to unnamed protein product [Vitis vinifera] (GB:CAO41305.1); contains InterPro domain Methyltransferase type 12 (InterPro:IPR013217) | chr3:4378345-4379354 FORWARD no original description	-1.14173	0.0368885
11780750	glyma01g33690	highly similar to ( 806)AT2G22410| Symbols: | pentatricopeptide (PPR) repeat-containing protein | chr2:9516115-9518160 FORWARDvery weakly similar to ( 100)RF1_ORYSA no original description	-1.08873	0.624468
11780758	glyma01g33720	moderately similar to ( 295)AT2G45270| Symbols: | glycoprotease M22 family protein | chr2:18673657-18676406 FORWARD no original description	-1.19751	0.541717
11780770	glyma01g33750	moderately similar to ( 420)AT4G08900| Symbols: | arginase | chr4:5703496-5705177 FORWARDmoderately similar to ( 374)ARGI_SOYBN no original description	-1.34113	0.175868
11780784	glyma01g33880	moderately similar to ( 254)AT1G71820| Symbols: | similar to hypothetical protein OsI_008770 [Oryza sativa (indica cultivar-group)] (GB:EAY87537.1); similar to exocyst complex subunit SEC6 [Carica papaya] (GB:ABS32232.1); similar to unnamed protein product [Vitis vinifera] (GB:CAO67837.1); contains InterPro domain Exocyst complex component Sec6 (InterPro:IPR010326) | chr1:27013684-27020407 FORWAR…	-1.04534	0.702517
11780791	glyma01g33890	moderately similar to ( 315)AT4G08850| Symbols: | leucine-rich repeat family protein / protein kinase family protein | chr4:5637464-5640493 REVERSEmoderately similar to ( 208)RPK1_IPONI no original description	-1.07368	0.771274
11780797	glyma01g33900	moderately similar to ( 206)AT4G00100| Symbols: RPS13, PFL2, ATRPS13A | ATRPS13A (RIBOSOMAL PROTEIN S13A); structural constituent of ribosome | chr4:37172-38123 FORWARDmoderately similar to ( 212)RS13_SOYBN no original description	1.26871	0.117771
11780802	glyma01g33910	moderately similar to ( 419)AT2G45350| Symbols: CRR4 | CRR4 (CHLORORESPIRATORY REDUCTION 4) | chr2:18701890-18703710 REVERSE no original description	1.04457	0.928969
11780817	glyma01g34000	no original description	2.00927	0.0369157
11780827	glyma01g34030	no original description	1.11219	0.88548
11780830	glyma01g34040	no original description	1.51075	0.21235
11780832	glyma01g34060	no original description	1.11842	0.805915
11780853	glyma01g34180	weakly similar to ( 104)AT5G17450| Symbols: | heavy-metal-associated domain-containing protein / copper chaperone (CCH)-related | chr5:5755829-5756745 FORWARD no original description	-1.14644	0.644426
11780865	glyma01g34240	weakly similar to ( 151)AT2G45380| Symbols: | similar to glycine-rich protein [Arabidopsis thaliana] (TAIR:AT4G22740.2); similar to glycine-rich protein [Arabidopsis thaliana] (TAIR:AT4G22740.1); similar to unnamed protein product [Vitis vinifera] (GB:CAO16973.1); similar to Os06g0134900 [Oryza sativa (japonica cultivar-group)] (GB:NP_001056719.1); similar to unnamed protein product [Vitis vinife…	2.95052	0.0669179
11780871	glyma01g34250	no original description	1.17634	0.487563
11780874	glyma01g34260	no original description	-1.06059	0.607563
11780877	glyma01g34270	moderately similar to ( 441)AT3G60800| Symbols: | zinc finger (DHHC type) family protein | chr3:22478461-22480248 REVERSE no original description	1.08593	0.554859
11780889	glyma01g34360	weakly similar to ( 179)AT2G02390| Symbols: GST18, ATGSTZ1 | ATGSTZ1 (GLUTATHIONE S-TRANSFERASE 18); glutathione transferase | chr2:629014-630954 FORWARDweakly similar to ( 173)GSTZ1_DIACA no original description	1.06757	0.745238
11780917	glyma01g34410	weakly similar to ( 182)AT4G12080| Symbols: | DNA-binding family protein | chr4:7239460-7241240 FORWARD no original description	-1.11174	0.23931
11780926	glyma01g34420	moderately similar to ( 440)AT5G22100| Symbols: | RNA cyclase family protein | chr5:7329018-7330721 FORWARD no original description	1.00496	0.990965
11780946	glyma01g34500	no original description	-1.04614	0.924548
11780954	glyma01g34550	weakly similar to ( 200)AT3G51700| Symbols: | similar to unknown protein [Arabidopsis thaliana] (TAIR:AT3G51690.1); similar to hypothetical protein 31.t00030 [Brassica oleracea] (GB:ABD65117.1); contains InterPro domain Protein of unknown function DUF889, eukaryote (InterPro:IPR010285) | chr3:19190422-19192124 REVERSE no original description	-1.30006	0.439405
11780959	glyma01g34590	nearly identical (1075)AT1G01950| Symbols: | armadillo/beta-catenin repeat family protein / kinesin motor family protein | chr1:325473-330403 FORWARDweakly similar to ( 189)KLP1_CHLRE no original description	1.1336	0.524684
11780987	glyma01g34620	no original description	1.37433	0.166598
11780992	glyma01g34630	moderately similar to ( 295)AT1G01940| Symbols: | peptidyl-prolyl cis-trans isomerase cyclophilin-type family protein | chr1:323082-324719 FORWARDweakly similar to ( 103)CYPH_MAIZE no original description	1.10473	0.521116
11780999	glyma01g34660	weakly similar to ( 172)AT5G18800| Symbols: | NADH-ubiquinone oxidoreductase 19 kDa subunit (NDUFA8) family protein | chr5:6267306-6268395 FORWARD no original description	-1.06302	0.935096
11781009	glyma01g34680	no original description	-1.19939	0.309169
11781014	glyma01g34700	highly similar to ( 610)AT4G29060| Symbols: EMB2726 | EMB2726 (EMBRYO DEFECTIVE 2726); translation elongation factor | chr4:14317750-14321321 FORWARD no original description	-3.49816	0.0485331
11781042	glyma01g34800	highly similar to ( 503)AT1G67280| Symbols: | lactoylglutathione lyase, putative / glyoxalase I, putative | chr1:25192226-25193797 REVERSEmoderately similar to ( 392)LGUL_ORYSA no original description	-1.83599	0.203619
11781054	glyma01g34840	nearly identical (1425)AT2G20050| Symbols: | protein serine/threonine phosphatase | chr2:8656860-8661274 REVERSEvery weakly similar to (81.6)KPK1_PHAVU no original description	-1.72126	0.0310386
11781079	glyma01g34900	moderately similar to ( 306)AT4G23160| Symbols: | protein kinase family protein | chr4:12129496-12134097 FORWARDmoderately similar to ( 285)POLX_TOBAC no original description	1.10785	0.70398
11781085	glyma01g34930	very weakly similar to (80.5)AT1G63310| Symbols: | similar to oxidoreductase, acting on NADH or NADPH [Arabidopsis thaliana] (TAIR:AT1G75260.1); similar to unnamed protein product [Vitis vinifera] (GB:CAO62854.1) | chr1:23490245-23490709 REVERSE no original description	-1.08759	0.696064
11781088	glyma01g34940	moderately similar to ( 211)AT1G49590| Symbols: | formin-binding protein-related | chr1:18358665-18360077 FORWARD no original description	1.1237	0.605471
11781096	glyma01g34960	moderately similar to ( 309)AT5G04610| Symbols: | spermidine synthase-related / putrescine aminopropyltransferase-related | chr5:1325613-1326917 REVERSE no original description	1.02841	0.914062
11781099	glyma01g34980	highly similar to ( 514)AT2G20020| Symbols: | Identical to CRS2-associated factor 1, chloroplast precursor [Arabidopsis Thaliana] (GB:Q9SL79;GB:Q94AQ2); similar to ATCAF2/CAF2 (ARABIDOPSIS THALIANA HOMOLOG OF MAIZE CAF2) [Arabidopsis thaliana] (TAIR:AT1G23400.1); similar to unnamed protein product [Vitis vinifera] (GB:CAO65472.1); contains InterPro domain CRS1/YhbY (InterPro:IPR001890) | chr2:865…	-1.43434	0.262759
11781110	glyma01g35050	no original description	1.5257	0.385783
11781112	glyma01g35080	moderately similar to ( 327)AT1G07615| Symbols: | GTP binding | chr1:2342274-2344197 REVERSE no original description	-1.14797	0.656352
11781118	glyma01g35130	moderately similar to ( 351)AT5G45550| Symbols: | mob1/phocein family protein | chr5:18479511-18482067 FORWARD no original description	1.22111	0.484916
11781127	glyma01g35160	moderately similar to ( 306)AT2G19640| Symbols: ASHR2 | ASHR2 (ASH1-RELATED PROTEIN 2) | chr2:8498483-8499679 FORWARD no original description	-1.27678	0.420808
11781131	glyma01g35190	highly similar to ( 659)AT4G19110| Symbols: | protein kinase, putative | chr4:10454781-10457043 REVERSEmoderately similar to ( 218)CDC2A_ANTMA no original description	1.49821	0.0131259
11781152	glyma01g35220	nearly identical (1004)AT1G31850| Symbols: | dehydration-responsive protein, putative | chr1:11431145-11433423 FORWARD no original description	-1.58096	0.0957714
11781165	glyma01g35250	no original description	1.04021	0.949134
11781171	glyma01g35260	no original description	-1.15315	0.588554
11781179	glyma01g35280	moderately similar to ( 378)AT5G45390| Symbols: NCLPP3, NCLPP4, CLPP4 | CLPP4 (Clp protease proteolytic subunit 4); endopeptidase Clp | chr5:18413578-18414813 FORWARDweakly similar to ( 160)CLPP_CHLVU no original description	-1.25807	0.272368
11781183	glyma01g35300	moderately similar to ( 208)AT4G19150| Symbols: | ankyrin repeat family protein | chr4:10471589-10472251 REVERSE no original description	1.17115	0.268256
11781188	glyma01g35320	highly similar to ( 642)AT1G31830| Symbols: | amino acid permease family protein | chr1:11418856-11420295 REVERSE no original description	-1.09357	0.525893
11781192	glyma01g35360	moderately similar to ( 228)AT5G07840| Symbols: | ankyrin repeat family protein | chr5:2506765-2507292 REVERSE no original description	1.01311	0.965139
11781198	glyma01g35380	no original description	1.48641	0.295221
11781200	glyma01g35410	no original description	-1.09802	0.870595
11781204	glyma01g35450	highly similar to ( 662)AT5G45275| Symbols: | similar to nodulin-related [Arabidopsis thaliana] (TAIR:AT4G19450.1); similar to NFD4 (NUCLEAR FUSION DEFECTIVE 4) [Arabidopsis thaliana] (TAIR:AT1G31470.1); similar to unnamed protein product [Vitis vinifera] (GB:CAO63775.1); contains InterPro domain MFS general substrate transporter (InterPro:IPR016196); contains InterPro domain Nodulin-like (InterP…	1.5192	0.596544
11781208	glyma01g35470	moderately similar to ( 332)AT1G31500| Symbols: | endonuclease/exonuclease/phosphatase family protein | chr1:11273802-11276515 REVERSE no original description	-1.67285	0.0372278
11781223	glyma01g35560	highly similar to ( 682)AT3G47570| Symbols: | leucine-rich repeat transmembrane protein kinase, putative | chr3:17538596-17541733 FORWARDmoderately similar to ( 323)RPK1_IPONI no original description	2.06221	0.2618
11781231	glyma01g35580	moderately similar to ( 211)AT5G45310| Symbols: | similar to unnamed protein product [Vitis vinifera] (GB:CAO63757.1) | chr5:18376600-18378023 REVERSE no original description	1.00421	0.99029
11781238	glyma01g35590	moderately similar to ( 201)AT5G45320| Symbols: | similar to unknown protein [Arabidopsis thaliana] (TAIR:AT3G26350.1); similar to hypothetical protein [Vitis vinifera] (GB:CAN78292.1); contains InterPro domain Harpin-induced 1 (InterPro:IPR010847) | chr5:18379581-18380280 REVERSE no original description	1.00885	0.980338
11781242	glyma01g35640	weakly similar to ( 180)AT5G45330| Symbols: | similar to unknown protein [Arabidopsis thaliana] (TAIR:AT1G26110.1); similar to hypothetical protein [Glycine max] (GB:BAB41197.1); contains domain PTHR13586 (PTHR13586) | chr5:18380928-18383771 REVERSE no original description	1.10866	0.590545
11781253	glyma01g35660	highly similar to ( 649)AT4G19230| Symbols: CYP707A1 | CYP707A1 (cytochrome P450, family 707, subfamily A, polypeptide 1); oxygen binding | chr4:10521535-10523577 FORWARDmoderately similar to ( 228)C85A1_ORYSA no original description	-2.89387	0.0604707
11781264	glyma01g35680	moderately similar to ( 213)ATCG00270| Symbols: PSBD | PSII D2 protein | chrC:32711-33772 FORWARDmoderately similar to ( 214)PSBD_PINTH no original description	-1.1671	0.543361
11781271	glyma01g35730	moderately similar to ( 241)AT4G19210| Symbols: ATRLI2 | ATRLI2 (Arabidopsis thaliana RNase L inhibitor protein 2) | chr4:10501917-10504787 FORWARD no original description	1.03879	0.808852
11781281	glyma01g35740	no original description	1.71855	0.428198
11781286	glyma01g35750	moderately similar to ( 348)AT5G45360| Symbols: | F-box family protein | chr5:18402010-18403897 REVERSE no original description	1.20685	0.113713
11781298	glyma01g35790	moderately similar to ( 354)AT4G19190| Symbols: | zinc knuckle (CCHC-type) family protein | chr4:10493334-10495980 FORWARD no original description	1.13779	0.230916
11781308	glyma01g35800	highly similar to ( 990)AT1G31770| Symbols: | ABC transporter family protein | chr1:11375233-11377625 REVERSEmoderately similar to ( 204)PDR15_ORYSA no original description	-1.82823	0.0612063
11781315	glyma01g35880	no original description	-1.0881	0.561148
11781317	glyma01g35910	highly similar to ( 735)AT4G19170| Symbols: NCED4 | NCED4 (NINE-CIS-EPOXYCAROTENOID DIOXYGENASE 4) | chr4:10481846-10483633 FORWARD no original description	-1.46042	0.104763
11781321	glyma01g35920	moderately similar to ( 324)AT1G31790| Symbols: | pentatricopeptide (PPR) repeat-containing protein | chr1:11394725-11395954 REVERSE no original description	-1.23672	0.752026
11781329	glyma01g35940	highly similar to ( 623)AT3G45890| Symbols: | similar to unknown protein [Arabidopsis thaliana] (TAIR:AT1G13770.1); similar to unnamed protein product [Vitis vinifera] (GB:CAO23851.1); contains InterPro domain Protein of unknown function DUF647 (InterPro:IPR006968) | chr3:16882682-16885085 FORWARD no original description	-1.0983	0.718684
11781337	glyma01g35980	moderately similar to ( 449)AT5G06740| Symbols: | lectin protein kinase family protein | chr5:2084095-2086053 FORWARDweakly similar to ( 191)NORK_MEDTR no original description	-1.28821	0.251133
11781340	glyma01g36000	moderately similar to ( 469)AT2G04160| Symbols: AIR3 | AIR3 (Auxin-Induced in Root cultures 3); subtilase | chr2:1401447-1407691 REVERSE no original description	-1.65852	0.159101
11781356	glyma01g36030	moderately similar to ( 390)AT1G76520| Symbols: | auxin efflux carrier family protein | chr1:28720278-28722183 FORWARD no original description	-1.29705	0.436987
11781380	glyma01g36080	highly similar to ( 677)AT1G76490| Symbols: HMGR1, HMG1 | HMG1 (3-HYDROXY-3-METHYLGLUTARYL COA REDUCTASE) | chr1:28700695-28703100 FORWARDhighly similar to ( 691)HMDH3_SOLTU no original description	-1.43267	0.471792
11781387	glyma01g36120	moderately similar to ( 412)AT2G17270| Symbols: | mitochondrial substrate carrier family protein | chr2:7517538-7519200 FORWARD no original description	-1.36361	0.359102
11781396	glyma01g36160	weakly similar to ( 140)AT1G76410| Symbols: ATL8 | ATL8; protein binding / zinc ion binding | chr1:28673809-28674366 FORWARD no original description	-1.09036	0.760414
11781400	glyma01g36170	highly similar to ( 624)AT2G17480| Symbols: ATMLO8, MLO8 | MLO8 (MILDEW RESISTANCE LOCUS O 8); calmodulin binding | chr2:7597641-7600850 REVERSEmoderately similar to ( 411)MLOH1_HORVU no original description	1.07935	0.882643
11781417	glyma01g36210	nearly identical (1075)AT3G51480| Symbols: GLR3.6, ATGLR3.6 | ATGLR3.6 (Arabidopsis thaliana glutamate receptor 3.6) | chr3:19112235-19115660 FORWARDhighly similar to ( 952)GLR31_ORYSA no original description	-1.31175	0.241744
11781430	glyma01g36270	no original description	1.05636	0.690071
11781435	glyma01g36290	weakly similar to ( 165)AT4G35530| Symbols: | phosphatidylinositolglycan-related | chr4:16871930-16873285 REVERSE no original description	-1.0746	0.758959
11781443	glyma01g36300	moderately similar to ( 344)AT2G17550| Symbols: | similar to unknown protein [Arabidopsis thaliana] (TAIR:AT5G02390.1); similar to unnamed protein product [Vitis vinifera] (GB:CAO14481.1) | chr2:7641577-7643852 REVERSE no original description	1.2174	0.443746
11781465	glyma01g36320	moderately similar to ( 261)AT5G66005| Symbols: | Expressed protein | chr5:26415090-26416349 REVERSE no original description	-1.09587	0.590147
11781474	glyma01g36350	moderately similar to ( 395)AT4G13650| Symbols: | pentatricopeptide (PPR) repeat-containing protein | chr4:7939607-7942894 REVERSEvery weakly similar to (88.2)RF1_ORYSA no original description	-1.20563	0.0277272
11781478	glyma01g36390	highly similar to ( 994)AT3G51460| Symbols: RHD4 | phosphoinositide phosphatase family protein | chr3:19103986-19108121 FORWARD no original description	1.59211	0.0842274
11781503	glyma01g36410	moderately similar to ( 387)AT2G17200| Symbols: | ubiquitin family protein | chr2:7489215-7492172 REVERSE no original description	1.15255	0.245988
11781514	glyma01g36450	highly similar to ( 514)AT5G66030| Symbols: ATGRIP, GRIP | ATGRIP/GRIP | chr5:26422359-26427114 REVERSE no original description	-1.1003	0.596939
11781537	glyma01g36460	moderately similar to ( 391)AT4G35640| Symbols: ATSERAT3;2 | ATSERAT3;2 (SERINE ACETYLTRANSFERASE 3;2); acetyltransferase/ serine O-acetyltransferase | chr4:16905760-16907982 REVERSE no original description	-2.09283	0.0803162
11781546	glyma01g36530	weakly similar to ( 170)AT3G43630| Symbols: | nodulin, putative | chr3:15549804-15550406 FORWARDweakly similar to ( 135)NO21_SOYBN no original description	-1.12728	0.811123
11781552	glyma01g36600	moderately similar to ( 300)AT4G35750| Symbols: | Rho-GTPase-activating protein-related | chr4:16940870-16941679 REVERSE no original description	1.22384	0.623645
11781558	glyma01g36610	weakly similar to ( 138)AT4G35760| Symbols: | electron carrier/ protein disulfide oxidoreductase | chr4:16942738-16944627 REVERSE no original description	-1.14272	0.160946
11781565	glyma01g36630	highly similar to ( 796)AT4G35780| Symbols: | protein kinase family protein | chr4:16946734-16950410 REVERSEweakly similar to ( 137)NORK_PEA no original description	1.25642	0.580087
11781586	glyma01g36640	moderately similar to ( 238)AT5G66050| Symbols: | similar to wound-responsive family protein [Arabidopsis thaliana] (TAIR:AT1G19660.2); similar to wound-responsive family protein [Arabidopsis thaliana] (TAIR:AT1G19660.1); similar to unnamed protein product [Vitis vinifera] (GB:CAO24574.1); contains InterPro domain Protein of unknown function DUF151 (InterPro:IPR003729) | chr5:26429559-26431654 RE…	1.4273	0.0513377
11781600	glyma01g36660	moderately similar to ( 433)AT5G66055| Symbols: EMB2036, AKRP | AKRP/EMB2036 (EMBRYO DEFECTIVE 2036); protein binding | chr5:26435031-26436460 REVERSE no original description	-1.24952	0.0811409
11781617	glyma01g36670	weakly similar to ( 121)AT4G35785| Symbols: | transformer serine/arginine-rich ribonucleoprotein, putative | chr4:16953989-16955131 REVERSE no original description	1.47416	0.0672489
11781625	glyma01g36680	nearly identical (1038)AT4G35790| Symbols: PLDDELTA, ATPLDDELTA | ATPLDDELTA (Arabidopsis thaliana phospholipase D delta); phospholipase D | chr4:16955778-16959879 REVERSEhighly similar to ( 520)PLDA1_MAIZE no original description	-1.59717	0.0562005
11781638	glyma01g36700	nearly identical (2749)AT4G35800| Symbols: RNA_POL_II_LSRNA_POL_II_LS, RNA_POL_II_LS, RPB1, NRPB1 | NRPB1 (RNA POLYMERASE II LARGE SUBUNIT); DNA binding / DNA-directed RNA polymerase | chr4:16961119-16967896 REVERSEweakly similar to ( 137)RPOC1_MESVI no original description	1.1766	0.0283827
11781655	glyma01g36730	very weakly similar to (84.0)AT5G59570| Symbols: | myb family transcription factor | chr5:24021273-24022169 FORWARD no original description	1.10727	0.476974
11781658	glyma01g36750	nearly identical (1629)AT4G35830| Symbols: | aconitate hydratase, cytoplasmic / citrate hydro-lyase / aconitase (ACO) | chr4:16973011-16977282 REVERSEnearly identical (1617)ACOC_CUCMA no original description	-1.11062	0.689045
11781680	glyma01g36790	moderately similar to ( 243)AT1G63855| Symbols: | similar to unnamed protein product [Vitis vinifera] (GB:CAO23262.1); contains domain SSF53335 (SSF53335); contains domain PTHR14614 (PTHR14614) | chr1:23703935-23704617 REVERSE no original description	-1.19321	0.508953
11781688	glyma01g36820	no original description	-1.03121	0.95626
11781692	glyma01g36830	no original description	1.0368	0.902319
11781697	glyma01g36850	moderately similar to ( 225)AT5G42190| Symbols: ASK2, SKP1B | ASK2 (ARABIDOPSIS SKP1-LIKE 2); ubiquitin-protein ligase | chr5:16871723-16872744 REVERSE no original description	1.54981	0.0177189
11781703	glyma01g36860	highly similar to ( 513)AT4G35920| Symbols: MCA1 | MCA1 (MID1-COMPLEMENTING ACTIVITY 1) | chr4:17012109-17014195 REVERSE no original description	-1.33337	0.278453
11781716	glyma01g36880	moderately similar to ( 355)AT2G17800| Symbols: ARAC1, ATGP2, ATRAC1, RAC1, ROP3, AtROP3 | ARAC1/ATGP2/ATRAC1/AtROP3/RAC1/ROP3 (Rho-related protein from plants 3) | chr2:7747395-7749024 FORWARDmoderately similar to ( 358)RHO1_PEA no original description	-1.26577	0.234941
11781731	glyma01g36890	highly similar to ( 640)AT5G66120| Symbols: | 3-dehydroquinate synthase, putative | chr5:26448742-26450875 REVERSE no original description	-1.85959	0.0151965
11781746	glyma01g36920	moderately similar to ( 425)AT3G51290| Symbols: | proline-rich family protein | chr3:19050959-19053416 FORWARD no original description	1.10259	0.706823
11781751	glyma01g36950	nearly identical (1419)AT2G17820| Symbols: AHK1, ATHK1 | ATHK1 (HISTIDINE KINASE 1) | chr2:7750215-7755095 REVERSEvery weakly similar to (97.1)ETR1_BRAOL no original description	-1.57464	0.133551
11781766	glyma01g36960	moderately similar to ( 491)AT2G17840| Symbols: ERD7 | ERD7 (EARLY-RESPONSIVE TO DEHYDRATION 7) | chr2:7763005-7764880 REVERSE no original description	2.55252	0.0611088
11781772	glyma01g36970	weakly similar to ( 126)AT1G24100| Symbols: UGT74B1 | UGT74B1 (UDP-glucosyl transferase 74B1); UDP-glycosyltransferase/ thiohydroximate beta-D-glucosyltransferase/ transferase, transferring glycosyl groups | chr1:8525536-8526999 REVERSE no original description	1.48008	0.138356
11781775	glyma01g36980	nearly identical (1361)AT5G66150| Symbols: | glycosyl hydrolase family 38 protein | chr5:26456239-26461660 REVERSE no original description	1.05338	0.832931
11781805	glyma01g36990	moderately similar to ( 365)AT4G38630| Symbols: MCB1, ATMCB1, MBP1, RPN10 | RPN10 (REGULATORY PARTICLE NON-ATPASE 10) | chr4:18057351-18059453 REVERSE no original description	1.07277	0.301326
11781818	glyma01g37000	moderately similar to ( 418)AT1G11000| Symbols: ATMLO4, MLO4 | MLO4 (MILDEW RESISTANCE LOCUS O 4); calmodulin binding | chr1:3671935-3675909 REVERSEmoderately similar to ( 239)MLOH1_ORYSA no original description	1.11712	0.792872
11781833	glyma01g37010	weakly similar to ( 163)AT2G17850| Symbols: | similar to unknown protein [Arabidopsis thaliana] (TAIR:AT5G66170.2); similar to unnamed protein product [Vitis vinifera] (GB:CAO48196.1); contains InterPro domain Rhodanese-like (InterPro:IPR001763) | chr2:7767087-7767869 REVERSEweakly similar to ( 112)DIN1_RAPSA no original description	1.02513	0.922305
11781841	glyma01g37020	moderately similar to ( 265)AT4G38660| Symbols: | thaumatin, putative | chr4:18066442-18067786 REVERSEmoderately similar to ( 222)TLP1_PRUPE no original description	1.56251	0.124416
11781851	glyma01g37040	moderately similar to ( 317)AT4G36010| Symbols: | pathogenesis-related thaumatin family protein | chr4:17039475-17040979 REVERSEmoderately similar to ( 225)TLP1_PRUPE no original description	-1.73119	0.155106
11781862	glyma01g37060	weakly similar to ( 197)AT4G36010| Symbols: | pathogenesis-related thaumatin family protein | chr4:17039475-17040979 REVERSEweakly similar to ( 150)TLP1_PRUPE no original description	1.2693	0.13287
11781864	glyma01g37080	highly similar to ( 760)AT5G66200| Symbols: | armadillo/beta-catenin repeat family protein | chr5:26470874-26472829 REVERSE no original description	-1.39177	0.32551
11781868	glyma01g37090	weakly similar to ( 120)AT4G36040| Symbols: | DNAJ heat shock N-terminal domain-containing protein (J11) | chr4:17049711-17050196 REVERSE no original description	1.72664	0.356462
11781872	glyma01g37100	highly similar to ( 841)AT5G66210| Symbols: CPK28 | CPK28 (calcium-dependent protein kinase 28) | chr5:26474371-26476660 REVERSEmoderately similar to ( 451)CRK_DAUCA no original description	1.7134	0.0908549
11781887	glyma01g37120	highly similar to ( 577)AT3G51240| Symbols: TT6, F3'H, F3H | F3H (TRANSPARENT TESTA 6); naringenin 3-dioxygenase | chr3:19036388-19037637 FORWARDhighly similar to ( 585)FL3H_MALDO no original description	1.26187	0.584288
11781891	glyma01g37140	nearly identical (5980)AT2G17930| Symbols: | FAT domain-containing protein / phosphatidylinositol 3- and 4-kinase family protein | chr2:7791537-7809312 REVERSE no original description	-1.20228	0.0842274
11781928	glyma01g37160	moderately similar to ( 332)AT5G45600| Symbols: TAF14B, GAS41 | GAS41 (TBP-ASSOCIATED FACTOR 14B) | chr5:18505286-18506893 FORWARD no original description	-1.23169	0.222198
11781934	glyma01g37180	moderately similar to ( 251)AT2G17990| Symbols: | similar to kinectin-related [Arabidopsis thaliana] (TAIR:AT5G66250.3); similar to kinectin-related [Arabidopsis thaliana] (TAIR:AT5G66250.1); similar to kinectin-related [Arabidopsis thaliana] (TAIR:AT5G66250.2); similar to putative calcium-dependent protein kinase CPK1 adapter protein 2 [Mesembryanthemum crystallinum] (GB:AAR06858.1) | chr2:78345…	1.25144	0.0627692
11781942	glyma01g37200	no original description	-1.13501	0.58392
11781952	glyma01g37240	moderately similar to ( 305)AT4G36120| Symbols: | similar to unknown protein [Arabidopsis thaliana] (TAIR:AT1G19835.1); similar to unnamed protein product [Vitis vinifera] (GB:CAO48232.1); contains InterPro domain Protein of unknown function DUF869, plant (InterPro:IPR008587) | chr4:17093216-17096576 REVERSE no original description	1.03976	0.919186
11781964	glyma01g37290	moderately similar to ( 211)AT5G66290| Symbols: | similar to hypothetical protein [Thellungiella halophila] (GB:ABB45846.1) | chr5:26495143-26496667 REVERSE no original description	-1.46573	0.140733
11781976	glyma01g37310	moderately similar to ( 406)AT2G18060| Symbols: ANAC037, VND1 | VND1 (VASCULAR RELATED NAC-DOMAIN PROTEIN 1); transcription factor | chr2:7855481-7857385 REVERSEmoderately similar to ( 250)NAC76_ORYSA no original description	2.32286	0.0711891
11781982	glyma01g37330	nearly identical (1285)AT4G36180| Symbols: | leucine-rich repeat family protein | chr4:17120212-17123701 REVERSEmoderately similar to ( 347)PSKR_DAUCA no original description	-1.08111	0.840352
11781986	glyma01g37340	highly similar to ( 582)AT3G51150| Symbols: | kinesin motor family protein | chr3:19012985-19017488 FORWARDmoderately similar to ( 204)FLA10_CHLRE no original description	-1.05041	0.906805
11782006	glyma01g37380	highly similar to ( 723)AT3G51130| Symbols: | Identical to UPF0183 protein At3g51130 [Arabidopsis Thaliana] (GB:Q9SD33;GB:Q53YG9;GB:Q8LD70;GB:Q94C31); similar to unnamed protein product [Vitis vinifera] (GB:CAO48256.1); similar to Os06g0714000 [Oryza sativa (japonica cultivar-group)] (GB:NP_001058570.1); contains InterPro domain Protein of unknown function UPF0183 (InterPro:IPR005373) | chr3:1900…	1.49661	0.0497195
11782023	glyma01g37430	highly similar to ( 726)AT4G36220| Symbols: CYP84A1, FAH1 | FAH1 (FERULATE-5-HYDROXYLASE 1); ferulate 5-hydroxylase | chr4:17137587-17139622 REVERSEmoderately similar to ( 315)C71DA_SOYBN no original description	1.1747	0.554425
11782032	glyma01g37450	moderately similar to ( 218)AT5G66320| Symbols: | zinc finger (GATA type) family protein | chr5:26513434-26514535 REVERSE no original description	-2.21928	0.010175
11782037	glyma01g37460	moderately similar to ( 374)AT5G66330| Symbols: | leucine-rich repeat family protein | chr5:26517757-26519013 REVERSEweakly similar to ( 104)RPK1_IPONI no original description	-1.12587	0.776674
11782041	glyma01g37470	weakly similar to ( 174)AT3G54340| Symbols: AP3 | AP3 (APETALA 3); DNA binding / transcription factor | chr3:20130406-20132065 REVERSEweakly similar to ( 186)DEFA_ANTMA no original description	1.17239	0.832077
11782053	glyma01g37480	moderately similar to ( 269)AT1G75440| Symbols: UBC16 | UBC16 (UBIQUITIN-CONJUGATING ENZYME 16); ubiquitin-protein ligase | chr1:28317284-28318621 FORWARD no original description	1.60585	0.382808
11782062	glyma01g37490	highly similar to ( 747)AT4G36400| Symbols: | FAD linked oxidase family protein | chr4:17197268-17200475 FORWARD no original description	1.83447	0.0481066
11782079	glyma01g37520	moderately similar to ( 324)AT5G66360| Symbols: | ribosomal RNA adenine dimethylase family protein | chr5:26527555-26528937 FORWARD no original description	-1.7696	0.139612
11782083	glyma01g37550	weakly similar to ( 179)AT3G51030| Symbols: ATTRX H1, ATTRX1 | ATTRX1 (Arabidopsis thaliana thioredoxin H-type 1); thiol-disulfide exchange intermediate | chr3:18962104-18962936 REVERSEweakly similar to ( 185)TRXH_RICCO no original description	-1.14841	0.646956
11782090	glyma01g37560	moderately similar to ( 279)AT3G51040| Symbols: RTH | RTH (RTE1-HOMOLOG) | chr3:18963262-18964041 REVERSE no original description	1.05773	0.708242
11782105	glyma01g37590	weakly similar to ( 184)AT5G66350| Symbols: SHI | SHI (SHORT INTERNODES); transcription factor | chr5:26521940-26523369 REVERSE no original description	-1.17217	0.498829
11782108	glyma01g37610	weakly similar to ( 160)AT1G77370| Symbols: | glutaredoxin, putative | chr1:29078810-29079536 FORWARDvery weakly similar to (97.1)GLRX_RICCO no original description	1.32074	0.113718
11782116	glyma01g37630	highly similar to ( 523)AT5G66390| Symbols: | peroxidase 72 (PER72) (P72) (PRXR8) | chr5:26533289-26534555 REVERSEmoderately similar to ( 303)PER1_ARAHY no original description	1.01214	0.981843
11782123	glyma01g37640	highly similar to ( 543)AT2G18180| Symbols: | SEC14 cytosolic factor, putative / phosphoglyceride transfer protein, putative | chr2:7918136-7920777 REVERSE no original description	1.17163	0.271856
11782135	glyma01g37650	moderately similar to ( 405)AT2G18193| Symbols: | AAA-type ATPase family protein | chr2:7924703-7926266 REVERSE no original description	-1.04751	0.917166
11782140	glyma01g37670	highly similar to ( 503)AT5G17760| Symbols: | AAA-type ATPase family protein | chr5:5861278-5862303 REVERSE no original description	-1.17644	0.603193
11782145	glyma01g37680	moderately similar to ( 226)AT5G66430| Symbols: | S-adenosyl-L-methionine:carboxyl methyltransferase family protein | chr5:26542636-26544025 REVERSEmoderately similar to ( 223)BAMT_ANTMA no original description	-1.0318	0.949128
11782149	glyma01g37690	very weakly similar to (87.8)AT5G66440| Symbols: | similar to unknown protein [Arabidopsis thaliana] (TAIR:AT4G34560.1); similar to hypothetical protein [Thellungiella halophila] (GB:ABB45849.1) | chr5:26547500-26548258 REVERSE no original description	2.37177	0.0486217
11782159	glyma01g37720	highly similar to ( 554)AT5G66460| Symbols: | (1-4)-beta-mannan endohydrolase, putative | chr5:26556137-26558063 REVERSE no original description	-1.05952	0.829218
11782168	glyma01g37730	moderately similar to ( 251)AT3G50910| Symbols: | similar to unknown protein [Arabidopsis thaliana] (TAIR:AT5G66480.1); similar to hypothetical protein [Thellungiella halophila] (GB:ABB45854.1) | chr3:18931170-18932980 FORWARD no original description	2.31115	0.0115825
11782174	glyma01g37750	no original description	2.02489	0.0104281
11782177	glyma01g37760	weakly similar to ( 196)AT1G75310| Symbols: AUL1 | AUL1 (auxin-like 1 protein); heat shock protein binding | chr1:28264665-28269785 FORWARD no original description	-2.20927	0.0395962
11782194	glyma01g37780	moderately similar to ( 437)AT1G19580| Symbols: GAMMA CA1 | GAMMA CA1 (GAMMA CARBONIC ANHYDRASE 1); carbonate dehydratase | chr1:6774928-6777083 FORWARD no original description	-1.24022	0.269664
11782202	glyma01g37790	moderately similar to ( 347)AT1G01050| Symbols: ATPPA1 | ATPPA1 (ARABIDOPSIS THALIANA PYROPHOSPHORYLASE 1); inorganic diphosphatase/ pyrophosphatase | chr1:31382-32670 REVERSEmoderately similar to ( 343)IPYR_ORYSA no original description	-1.00082	0.998437
11782215	glyma01g37810	moderately similar to ( 332)AT4G39230| Symbols: | isoflavone reductase, putative | chr4:18266018-18267598 REVERSEhighly similar to ( 533)IFR_MEDSA no original description	-1.03271	0.923773
11782223	glyma01g37820	moderately similar to ( 385)AT1G75280| Symbols: | isoflavone reductase, putative | chr1:28255691-28257016 FORWARDmoderately similar to ( 409)IFRH_TOBAC no original description	1.8459	0.161301
11782234	glyma01g37840	moderately similar to ( 391)AT1G75280| Symbols: | isoflavone reductase, putative | chr1:28255691-28257016 FORWARDmoderately similar to ( 407)IFRH_TOBAC no original description	-1.048	0.871309
11782242	glyma01g37850	moderately similar to ( 403)AT4G39230| Symbols: | isoflavone reductase, putative | chr4:18266018-18267598 REVERSEmoderately similar to ( 423)IFRH_TOBAC no original description	1.74263	0.1889
11782248	glyma01g37900	moderately similar to ( 474)AT5G66530| Symbols: | aldose 1-epimerase family protein | chr5:26571047-26572801 REVERSE no original description	-1.73842	0.104328
11782261	glyma01g37920	highly similar to ( 872)AT5G03260| Symbols: LAC11 | LAC11 (laccase 11); copper ion binding / oxidoreductase | chr5:777197-779337 REVERSEmoderately similar to ( 235)ASO_CUCSA no original description	-1.25207	0.672523
11782269	glyma01g37930	highly similar to ( 858)AT5G03260| Symbols: LAC11 | LAC11 (laccase 11); copper ion binding / oxidoreductase | chr5:777197-779337 REVERSEmoderately similar to ( 228)ASO_CUCSA no original description	-2.7455	0.300002
11782277	glyma01g37950	moderately similar to ( 323)AT4G36550| Symbols: | binding / ubiquitin-protein ligase | chr4:17245403-17247721 REVERSEvery weakly similar to (89.0)SPL11_ORYSA no original description	-1.36981	0.158334
11782284	glyma01g37990	weakly similar to ( 172)AT2G18350| Symbols: ATHB24 | ATHB24 (ARABIDOPSIS THALIANA HOMEOBOX PROTEIN 24); DNA binding / transcription factor | chr2:7978204-7978992 REVERSE no original description	1.22746	0.173425
11782297	glyma01g38220	no original description	1.18929	0.488666
11782301	glyma01g38230	moderately similar to ( 202)AT3G50845| Symbols: | similar to unknown protein [Arabidopsis thaliana] (TAIR:AT1G68310.1); similar to unknown [Picea sitchensis] (GB:ABK23822.1); contains InterPro domain Protein of unknown function DUF59 (InterPro:IPR002744) | chr3:18911088-18912190 REVERSE no original description	1.05291	0.740017
11782308	glyma01g38260	no original description	1.25277	0.376909
11782313	glyma01g38270	moderately similar to ( 312)AT2G18390| Symbols: ATARLC1, HAL, ARL2, TTN5 | TTN5 (TITAN 5); GTP binding | chr2:7995417-7996456 FORWARDweakly similar to ( 152)ARF1_ORYSA no original description	1.15711	0.69428
11782321	glyma01g38280	nearly identical (1367)AT1G63810| Symbols: | similar to unnamed protein product [Vitis vinifera] (GB:CAO22840.1); similar to Nrap protein, expressed [Oryza sativa (japonica cultivar-group)] (GB:ABA95898.2); similar to hypothetical protein [Vitis vinifera] (GB:CAN72980.1); contains InterPro domain Nrap protein (InterPro:IPR005554) | chr1:23673353-23679205 REVERSE no original description	-2.35651	0.0263516
11782349	glyma01g38320	highly similar to ( 519)AT2G33840| Symbols: | tRNA synthetase class I (W and Y) family protein | chr2:14322087-14324405 FORWARD no original description	-1.13583	0.178075
11782364	glyma01g38330	moderately similar to ( 268)AT4G38150| Symbols: | pentatricopeptide (PPR) repeat-containing protein | chr4:17901205-17902113 REVERSEvery weakly similar to (90.1)RF1_ORYSA no original description	1.33488	0.189754
11782366	glyma01g38350	moderately similar to ( 322)AT4G16580| Symbols: | catalytic | chr4:9341174-9342577 REVERSE no original description	1.27891	0.488579
11782375	glyma01g38380	moderately similar to ( 218)AT4G36730| Symbols: GBF1 | GBF1 (G-box binding factor 1); transcription factor | chr4:17309854-17311756 REVERSEweakly similar to ( 124)CPRF1_PETCR no original description	-1.08651	0.675164
11782389	glyma01g38390	weakly similar to ( 177)AT4G36740| Symbols: HB-5, ATHB40 | ATHB40/HB-5 (ARABIDOPSIS THALIANA HOMEOBOX PROTEIN 40); DNA binding / transcription factor | chr4:17314653-17316318 REVERSE no original description	-1.0621	0.904156
11782395	glyma01g38430	moderately similar to ( 414)AT5G66690| Symbols: UGT72E2 | UGT72E2; UDP-glycosyltransferase/ coniferyl-alcohol glucosyltransferase/ transferase, transferring glycosyl groups | chr5:26642381-26643826 FORWARDweakly similar to ( 157)ZOX_PHAVU no original description	1.05867	0.650018
11782397	glyma01g38450	moderately similar to ( 214)AT1G75080| Symbols: BZR1 | BZR1 (BRASSINAZOLE-RESISTANT 1) | chr1:28189370-28190724 FORWARD no original description	1.80013	0.170372
11782402	glyma01g38470	moderately similar to ( 244)AT2G18600| Symbols: | RUB1-conjugating enzyme, putative | chr2:8080419-8081647 REVERSE no original description	1.06307	0.751869
11782414	glyma01g38530	moderately similar to ( 412)AT4G36850| Symbols: | PQ-loop repeat family protein / transmembrane family protein | chr4:17353418-17355824 REVERSE no original description	1.12232	0.760921
11782427	glyma01g38560	moderately similar to ( 207)AT3G21630| Symbols: CERK1 | CERK1 (CHITIN ELICITOR RECEPTOR KINASE 1); kinase/ receptor signaling protein/ transmembrane receptor protein kinase | chr3:7615550-7618537 REVERSEweakly similar to ( 111)PSKR_DAUCA no original description	-1.19549	0.688023
11782432	glyma01g38570	highly similar to ( 523)AT5G66631| Symbols: | similar to MEE40 (maternal effect embryo arrest 40) [Arabidopsis thaliana] (TAIR:AT3G53700.1); similar to unnamed protein product [Vitis vinifera] (GB:CAO22920.1); contains InterPro domain Pentatricopeptide repeat (InterPro:IPR002885) | chr5:26613433-26615418 FORWARD no original description	-1.32612	0.0849068
11782439	glyma01g38590	moderately similar to ( 353)AT3G26300| Symbols: CYP71B34 | CYP71B34 (cytochrome P450, family 71, subfamily B, polypeptide 34); oxygen binding | chr3:9640436-9642103 REVERSEhighly similar to ( 587)C71D8_SOYBN no original description	-2.95551	0.0881764
11782444	glyma01g38600	moderately similar to ( 347)AT3G26300| Symbols: CYP71B34 | CYP71B34 (cytochrome P450, family 71, subfamily B, polypeptide 34); oxygen binding | chr3:9640436-9642103 REVERSEhighly similar to ( 571)C71D8_SOYBN no original description	1.27419	0.590774
11782447	glyma01g38610	moderately similar to ( 383)AT3G26310| Symbols: CYP71B35 | CYP71B35 (cytochrome P450, family 71, subfamily B, polypeptide 35); oxygen binding | chr3:9642326-9644016 REVERSEhighly similar to ( 614)C71D8_SOYBN no original description	-1.01643	0.970396
11782455	glyma01g38630	moderately similar to ( 339)AT3G26300| Symbols: CYP71B34 | CYP71B34 (cytochrome P450, family 71, subfamily B, polypeptide 34); oxygen binding | chr3:9640436-9642103 REVERSEhighly similar to ( 801)C71D8_SOYBN no original description	-1.01618	0.975106
11782459	glyma01g38640	moderately similar to ( 421)AT4G36860| Symbols: | zinc ion binding | chr4:17358577-17361188 REVERSE no original description	1.06121	0.352001
11782475	glyma01g38660	highly similar to ( 624)AT3G50780| Symbols: | protein binding | chr3:18886643-18888322 REVERSE no original description	-1.1514	0.354341
11782479	glyma01g38670	nearly identical (1203)AT2G23740| Symbols: | nucleic acid binding / transcription factor/ zinc ion binding | chr2:10105293-10110309 FORWARD no original description	1.07454	0.735427
11782495	glyma01g38690	weakly similar to ( 164)AT5G66590| Symbols: | allergen V5/Tpx-1-related family protein | chr5:26591481-26592038 FORWARDweakly similar to ( 178)ST14_SOLTU no original description	1.05134	0.740212
11782498	glyma01g38710	no original description	-2.38068	0.111385
11782502	glyma01g38720	weakly similar to ( 154)AT2G23690| Symbols: | similar to unknown protein [Arabidopsis thaliana] (TAIR:AT4G37240.1); similar to unnamed protein product [Vitis vinifera] (GB:CAO41608.1); similar to unnamed protein product [Vitis vinifera] (GB:CAO45438.1); similar to hypothetical protein [Vitis vinifera] (GB:CAN61825.1) | chr2:10079377-10083049 FORWARD no original description	1.0435	0.8397
11782506	glyma01g38730	moderately similar to ( 462)AT2G29760| Symbols: | pentatricopeptide (PPR) repeat-containing protein | chr2:12719961-12722177 FORWARDweakly similar to ( 107)RF1_ORYSA no original description	-1.19515	0.63287
11782508	glyma01g38740	weakly similar to ( 145)AT3G50810| Symbols: | integral membrane protein, putative | chr3:18898595-18900849 REVERSE no original description	-1.08056	0.597997
11782516	glyma01g38750	moderately similar to ( 473)AT3G50820| Symbols: PSBO2, PSBO-2 | PSBO-2/PSBO2 (PHOTOSYSTEM II SUBUNIT O-2); oxygen evolving/ poly(U) binding | chr3:18901989-18903292 REVERSEhighly similar to ( 509)PSBO_PEA no original description	-1.9306	0.0197941
11782529	glyma01g38780	moderately similar to ( 460)AT5G66560| Symbols: | phototropic-responsive NPH3 family protein | chr5:26581594-26583888 FORWARDweakly similar to ( 129)NPH3_ORYSA no original description	1.09865	0.758704
11782537	glyma01g38800	moderately similar to ( 278)AT4G37210| Symbols: | tetratricopeptide repeat (TPR)-containing protein | chr4:17512370-17514415 FORWARD no original description	-1.02695	0.738757
11782548	glyma01g38820	weakly similar to ( 106)AT2G23610| Symbols: | esterase, putative | chr2:10051490-10053483 REVERSEweakly similar to ( 102)PIR7A_ORYSA no original description	-1.08102	0.85733
11782551	glyma01g38840	moderately similar to ( 360)AT4G37130| Symbols: | hydroxyproline-rich glycoprotein family protein | chr4:17489561-17491767 FORWARD no original description	-1.40255	0.031674
11782560	glyma01g38850	highly similar to ( 511)AT2G23540| Symbols: | GDSL-motif lipase/hydrolase family protein | chr2:10031446-10033138 FORWARDweakly similar to ( 144)APG_BRANA no original description	1.86056	0.455695
11782566	glyma01g38890	nearly identical (1088)AT2G23460| Symbols: XLG1, ATXLG1 | XLG1 (EXTRA-LARGE G-PROTEIN 1); signal transducer | chr2:10002779-10006025 FORWARDweakly similar to ( 154)GPA1_LOTJA no original description	1.21762	0.0378221
11782580	glyma01g38900	moderately similar to ( 466)AT2G26490| Symbols: | transducin family protein / WD-40 repeat family protein | chr2:11275113-11276510 FORWARD no original description	1.0353	0.938498
11782583	glyma01g38910	no original description	-1.27921	0.318864
11782591	glyma01g38930	moderately similar to ( 305)AT4G37200| Symbols: HCF164 | HCF164 (High chlorophyll fluorescence 164); thiol-disulfide exchange intermediate | chr4:17509830-17511224 REVERSE no original description	-1.00094	0.996389
11782598	glyma01g38940	no original description	-1.52582	0.0415694
11782602	glyma01g38980	highly similar to ( 790)AT5G66920| Symbols: SKS17 | SKS17 (SKU5 Similar 17); copper ion binding / oxidoreductase | chr5:26740189-26742596 FORWARDhighly similar to ( 582)NTP3_TOBAC no original description	-1.15022	0.842592
11782613	glyma01g39020	moderately similar to ( 497)AT4G33950| Symbols: OST1, SNRK2-6, SRK2E, SNRK2.6, P44 | OST1/P44/SNRK2-6/SRK2E (OPEN STOMATA 1, SNF1-RELATED PROTEIN KINASE 2.6) | chr4:16272824-16274662 FORWARDmoderately similar to ( 486)SAPKA_ORYSA no original description	-1.39882	0.365806
11782627	glyma01g39060	moderately similar to ( 201)AT5G66870| Symbols: LBD36, ASL1 | ASL1 (LATERAL ORGAN BOUNDARIES domain gene 36) | chr5:26723847-26724788 FORWARD no original description	1.02508	0.922565
11782634	glyma01g39120	highly similar to ( 585)AT4G37080| Symbols: | similar to unknown protein [Arabidopsis thaliana] (TAIR:AT5G42690.2); similar to hypothetical protein [Populus tremula] (GB:CAM84232.1); contains InterPro domain Protein of unknown function DUF547 (InterPro:IPR006869) | chr4:17474199-17476710 FORWARD no original description	-1.65318	0.45985
11782647	glyma01g39140	weakly similar to ( 119)AT5G66820| Symbols: | similar to hypothetical protein [Vitis vinifera] (GB:CAN66294.1); similar to unnamed protein product [Vitis vinifera] (GB:CAO23751.1) | chr5:26706323-26708336 FORWARD no original description	-1.06712	0.869457
11782659	glyma01g39160	no original description	-1.07548	0.86691
11782663	glyma01g39170	no original description	1.1966	0.710246
11782666	glyma01g39180	no original description	1.19524	0.672434
11782668	glyma01g39190	moderately similar to ( 432)AT3G50620| Symbols: | nodulation protein-related | chr3:18795974-18797728 REVERSE no original description	-1.08392	0.80865
11782677	glyma01g39200	highly similar to ( 581)AT4G37040| Symbols: MAP1D | MAP1D (METHIONINE AMINOPEPTIDASE 1D); metalloexopeptidase | chr4:17455169-17457079 FORWARD no original description	-1.20771	0.57465
11782690	glyma01g39230	very weakly similar to (86.7)AT5G66800| Symbols: | similar to unknown protein [Arabidopsis thaliana] (TAIR:AT3G50640.1); similar to hypothetical protein [Vitis vinifera] (GB:CAN61148.1) | chr5:26688659-26689342 FORWARD no original description	-1.22613	0.234512
11782694	glyma01g39240	weakly similar to ( 142)AT2G15680| Symbols: | calmodulin-related protein, putative | chr2:6838106-6838669 FORWARDvery weakly similar to (81.6)CALM_CHLRE no original description	-1.14745	0.660907
11782698	glyma01g39250	weakly similar to ( 137)AT4G37020| Symbols: | similar to unnamed protein product [Vitis vinifera] (GB:CAO71839.1); contains domain PTHR10967:SF2 (PTHR10967:SF2); contains domain PTHR10967 (PTHR10967) | chr4:17445772-17447129 FORWARD no original description	1.12564	0.502824
11782708	glyma01g39260	moderately similar to ( 228)AT4G36990| Symbols: HSFB1, AT-HSFB1, ATHSF4, HSF4 | HSF4 (HEAT SHOCK FACTOR 4); DNA binding / transcription factor | chr4:17440654-17441700 FORWARD no original description	2.26825	0.0305442
11782713	glyma01g39270	weakly similar to ( 124)AT4G33985| Symbols: | similar to unknown protein [Arabidopsis thaliana] (TAIR:AT2G15590.2); similar to unnamed protein product [Vitis vinifera] (GB:CAO71847.1); contains InterPro domain Protein of unknown function DUF1685 (InterPro:IPR012881) | chr4:16288306-16288862 REVERSE no original description	-1.91369	0.00462523
11782719	glyma01g39310	highly similar to ( 528)AT5G67030| Symbols: LOS6, NPQ2, ATABA1, ZEP, IBS3, ATZEP, ABA1 | ABA1 (ABA DEFICIENT 1); zeaxanthin epoxidase | chr5:26771252-26774316 REVERSEhighly similar to ( 536)ABA2_NICPL no original description	2.29385	0.0230516
11782733	glyma01g39330	highly similar to ( 505)AT4G36960| Symbols: | RNA recognition motif (RRM)-containing protein | chr4:17427345-17429584 FORWARDvery weakly similar to (85.5)ROC3_NICSY no original description	1.31137	0.184055
11782749	glyma01g39350	moderately similar to ( 449)AT5G67050| Symbols: | lipase class 3 family protein | chr5:26776708-26778391 REVERSE no original description	1.06066	0.897995
11782757	glyma01g39360	weakly similar to ( 130)AT3G50330| Symbols: HEC2 | HEC2 (HECATE 2); DNA binding / transcription factor | chr3:18668405-18669100 REVERSE no original description	-1.08607	0.90008
11782759	glyma01g39420	highly similar to ( 574)AT1G01540| Symbols: | protein kinase family protein | chr1:195980-198383 FORWARDmoderately similar to ( 243)PSKR_DAUCA no original description	-1.83259	0.0276883
11782769	glyma01g39440	highly similar to ( 939)AT2G23420| Symbols: | nicotinate phosphoribosyltransferase family protein / NAPRTase family protein | chr2:9978899-9981989 FORWARD no original description	1.02713	0.931877
11782786	glyma01g39450	weakly similar to ( 132)AT4G36930| Symbols: SPT | SPT (SPATULA); DNA binding / transcription factor | chr4:17414164-17415942 FORWARD no original description	1.14714	0.436659
11782792	glyma01g39480	highly similar to ( 582)AT5G67130| Symbols: | phospholipase C | chr5:26808825-26810875 FORWARD no original description	1.02288	0.974415
11782803	glyma01g39490	highly similar to ( 903)AT2G23380| Symbols: ICU1, SDG1, SET1, CLF | CLF (CURLY LEAF); transcription factor | chr2:9962650-9967197 FORWARDhighly similar to ( 864)EZ1_MAIZE no original description	1.22993	0.739534
11782824	glyma01g39510	moderately similar to ( 426)AT2G23360| Symbols: | transport protein-related | chr2:9956536-9959807 FORWARD no original description	-1.10205	0.676294
11782835	glyma01g39520	moderately similar to ( 346)AT4G36920| Symbols: FLO2, FL1, AP2 | AP2 (APETALA 2); transcription factor | chr4:17400995-17403137 FORWARDweakly similar to ( 144)BBM1_BRANA no original description	1.42865	0.118208
11782848	glyma01g39540	weakly similar to ( 156)AT3G50260| Symbols: CEJ1, ATERF#011 | ATERF#011/CEJ1 (COOPERATIVELY REGULATED BY ETHYLENE AND JASMONATE 1); DNA binding / transcription factor | chr3:18645669-18646130 FORWARD no original description	1.04342	0.868134
11782855	glyma01g39560	moderately similar to ( 257)AT2G42240| Symbols: | similar to RNA-binding protein, putative [Arabidopsis thaliana] (TAIR:AT3G13700.2); similar to unnamed protein product [Vitis vinifera] (GB:CAO71899.1); contains InterPro domain RNA recognition motif, RNP-1; (InterPro:IPR000504); contains InterPro domain Nucleotide-binding, alpha-beta plait; (InterPro:IPR012677) | chr2:17603922-17606050 FORWARD no…	-1.2433	0.178857
11782867	glyma01g39580	moderately similar to ( 296)AT3G57870| Symbols: EMB1637, SCE1, AHUS5 | AHUS5 (SUMO CONJUGATION ENZYME 1); ubiquitin-protein ligase | chr3:21439808-21441087 REVERSEweakly similar to ( 119)UBC2_MEDSA no original description	1.46443	0.14077
11782875	glyma01g39600	weakly similar to ( 177)AT2G23320| Symbols: WRKY15 | WRKY15 (WRKY DNA-binding protein 15); transcription factor | chr2:9932078-9933071 FORWARD no original description	1.69899	0.0359991
11782881	glyma01g39640	moderately similar to ( 242)AT4G39220| Symbols: ATRER1A | ATRER1A (Arabidopsis thaliana endoplasmic reticulum retrieval protein 1A) | chr4:18264274-18265525 FORWARD no original description	1.1616	0.483631
11782886	glyma01g39660	highly similar to ( 533)AT5G67250| Symbols: VFB4, SKIP2 | SKIP2 (SKP1 INTERACTING PARTNER 2); ubiquitin-protein ligase | chr5:26848903-26850486 REVERSE no original description	1.35628	0.0883227
11782889	glyma01g39700	moderately similar to ( 323)AT3G62290| Symbols: ATARFA1E | ATARFA1E (ADP-RIBOSYLATION FACTOR A1E); GTP binding / phospholipase activator/ protein binding | chr3:23063262-23064520 FORWARDmoderately similar to ( 322)ARF2_ORYSA no original description	-1.09243	0.671346
11782897	glyma01g39710	no original description	1.15992	0.513963
11782901	glyma01g39720	moderately similar to ( 403)AT5G67270| Symbols: ATEB1C | ATEB1C (MICROTUBULE END BINDING PROTEIN 1); microtubule binding | chr5:26857474-26859210 REVERSE no original description	1.11195	0.503641
11782910	glyma01g39760	moderately similar to ( 364)AT4G37340| Symbols: CYP81D3 | CYP81D3 (cytochrome P450, family 81, subfamily D, polypeptide 3); oxygen binding | chr4:17564947-17566700 REVERSEmoderately similar to ( 225)C82A1_PEA no original description	1.47325	0.187689
11782915	glyma01g39810	no original description	1.27095	0.539809
11782919	glyma01g39830	nearly identical (1255)AT4G37460| Symbols: | binding | chr4:17608617-17615528 REVERSE no original description	1.22883	0.328329
11782946	glyma01g39850	moderately similar to ( 445)AT4G37470| Symbols: | hydrolase, alpha/beta fold family protein | chr4:17617039-17618357 REVERSE no original description	-1.04004	0.953026
11782951	glyma01g39860	moderately similar to ( 499)AT4G33920| Symbols: | protein phosphatase 2C family protein / PP2C family protein | chr4:16260881-16262708 FORWARD no original description	1.34176	0.227694
11782956	glyma01g39870	no original description	1.17565	0.521979
11782959	glyma01g39890	moderately similar to ( 384)AT5G67370| Symbols: | similar to unknown protein [Arabidopsis thaliana] (TAIR:AT5G11840.1); similar to hypothetical protein [Vitis vinifera] (GB:CAN75014.1); contains InterPro domain Protein of unknown function DUF1230 (InterPro:IPR009631) | chr5:26894893-26896691 REVERSE no original description	-1.96913	0.0564011
11782969	glyma01g39910	moderately similar to ( 452)AT2G23093| Symbols: | similar to unknown protein [Arabidopsis thaliana] (TAIR:AT3G49310.1); similar to unnamed protein product [Vitis vinifera] (GB:CAO71977.1); contains InterPro domain Protein of unknown function DUF791 (InterPro:IPR008509); contains InterPro domain MFS general substrate transporter (InterPro:IPR016196) | chr2:9839273-9841496 FORWARD no original descr…	-1.47764	0.44643
11782981	glyma01g39920	weakly similar to ( 104)AT4G24230| Symbols: ACBP3 | ACBP3 (ACYL-COA-BINDING DOMAIN 3) | chr4:12567132-12568764 REVERSE no original description	-1.59632	0.0782662
11782987	glyma01g39950	highly similar to ( 609)AT5G67380| Symbols: ATCKA1, CKA1 | CKA1 (CASEIN KINASE ALPHA 1); kinase | chr5:26898382-26900609 REVERSEhighly similar to ( 591)CSK2A_MAIZE no original description	2.00603	0.024601
11783000	glyma01g39960	highly similar to ( 778)AT4G37510| Symbols: | ribonuclease III family protein | chr4:17626253-17628848 REVERSE no original description	-2.43388	0.0322858
11783008	glyma01g39980	no original description	-1.31818	0.148725
11783011	glyma01g40010	moderately similar to ( 241)AT3G49940| Symbols: LBD38 | LBD38 (LOB DOMAIN-CONTAINING PROTEIN 38) | chr3:18525450-18526287 FORWARD no original description	-1.23451	0.450897
11783020	glyma01g40040	no original description	-1.44562	0.240335
11783027	glyma01g40060	moderately similar to ( 265)AT5G67460| Symbols: | glycosyl hydrolase family protein 17 | chr5:26939210-26940500 REVERSE no original description	-1.00965	0.982982
11783032	glyma01g40090	moderately similar to ( 437)AT5G67480| Symbols: BT4 | BT4 (BTB AND TAZ DOMAIN PROTEIN 4); protein binding | chr5:26948281-26949755 REVERSE no original description	1.02906	0.957182
11783038	glyma01g40130	nearly identical (1661)AT4G37640| Symbols: ACA2 | ACA2 (CALCIUM ATPASE 2); calmodulin binding | chr4:17683219-17686802 REVERSEnearly identical (1606)ACA1_ORYSA no original description	-1.56492	0.0954322
11783049	glyma01g40150	weakly similar to ( 176)AT3G49910| Symbols: | 60S ribosomal protein L26 (RPL26A) | chr3:18515296-18515736 FORWARDweakly similar to ( 157)RL26_BRARA no original description	-1.14632	0.459162
11783053	glyma01g40190	highly similar to ( 640)AT3G49880| Symbols: | glycosyl hydrolase family protein 43 | chr3:18507892-18509383 FORWARD no original description	1.33174	0.153173
11783056	glyma01g40200	moderately similar to ( 251)AT5G67550| Symbols: | similar to unknown protein [Arabidopsis thaliana] (TAIR:AT1G71110.1); similar to hypothetical protein [Vitis vinifera] (GB:CAN65326.1) | chr5:26964134-26966338 REVERSE no original description	-1.19063	0.361828
11783068	glyma01g40220	weakly similar to ( 196)AT5G67580| Symbols: TRB2, ATTRB2 | ATTRB2/TRB2 (TELOMERE REPEAT BINDING FACTOR 2); DNA binding / transcription factor | chr5:26973069-26974299 REVERSE no original description	-1.0018	0.996586
11783077	glyma01g40230	highly similar to ( 793)AT2G22910| Symbols: | GCN5-related N-acetyltransferase (GNAT) family protein / amino acid kinase family protein | chr2:9757068-9759817 FORWARD no original description	-1.02912	0.926017
11783092	glyma01g40240	moderately similar to ( 233)AT5G67610| Symbols: | similar to unknown protein [Arabidopsis thaliana] (TAIR:AT3G49840.1); similar to unnamed protein product [Vitis vinifera] (GB:CAO17677.1) | chr5:26978450-26980840 REVERSE no original description	-1.34948	0.020944
11783103	glyma01g40280	no original description	-1.58606	0.115329
11783110	glyma01g40340	moderately similar to ( 401)AT5G65890| Symbols: ACR1 | ACR1 (ACT DOMAIN REPEAT 1) | chr5:26373273-26374947 FORWARD no original description	1.40202	0.288086
11783117	glyma01g40360	no original description	1.28667	0.250918
11783122	glyma01g40410	moderately similar to ( 233)AT3G49690| Symbols: RAX3, MYB84, ATMYB84 | ATMYB84/MYB84/RAX3 (myb domain protein 84); DNA binding / transcription factor | chr3:18438926-18440085 FORWARDweakly similar to ( 164)MYB4_ORYSA no original description	1.05083	0.878872
11783128	glyma01g40420	highly similar to ( 598)AT3G49680| Symbols: ATBCAT-3, BCAT3 | ATBCAT-3/BCAT3 (BRANCHED-CHAIN AMINOTRANSFERASE 3) | chr3:18433753-18436458 FORWARD no original description	-1.15251	0.476236
11783140	glyma01g40430	moderately similar to ( 273)AT5G65770| Symbols: LINC4 | LINC4 (LITTLE NUCLEI4) | chr5:26328813-26332836 FORWARD no original description	1.19397	0.385912
11783153	glyma01g40460	moderately similar to ( 477)AT5G65730| Symbols: | xyloglucan:xyloglucosyl transferase, putative / xyloglucan endotransglycosylase, putative / endo-xyloglucan transferase, putative | chr5:26316306-26317516 FORWARDmoderately similar to ( 311)XTH_TOBAC no original description	-6.81416	0.0131559
11783158	glyma01g40510	highly similar to ( 719)AT5G65720| Symbols: ATNIFS1, NIFS1, NFS1, ATNFS1 | ATNFS1/ATNIFS1/NFS1/NIFS1 (ARABIOPSIS THALIANA NITROGEN FIXATION S HOMOLOG 1) | chr5:26313959-26314936 FORWARD no original description	-1.04228	0.916864
11783163	glyma01g40530	weakly similar to ( 104)AT2G22790| Symbols: | similar to unknown protein [Arabidopsis thaliana] (TAIR:AT5G67020.1); similar to unnamed protein product [Vitis vinifera] (GB:CAO17740.1) | chr2:9703012-9703989 FORWARD no original description	1.64429	0.141655
11783165	glyma01g40540	no original description	1.10528	0.82723
11783172	glyma01g40550	highly similar to ( 858)AT1G50010| Symbols: TUA2 | TUA2 (tubulin alpha-2 chain) | chr1:18521405-18523397 FORWARDhighly similar to ( 862)TBA1_PEA no original description	-1.08251	0.853253
11783179	glyma01g40560	highly similar to ( 840)AT5G65710| Symbols: HSL2 | HSL2 (HAESA-LIKE 2); ATP binding / kinase/ protein serine/threonine kinase | chr5:26309598-26312666 FORWARDmoderately similar to ( 244)RPK1_IPONI no original description	-5.01467	0.00725024
11783189	glyma01g40590	nearly identical (1524)AT5G65700| Symbols: BAM1 | BAM1 (big apical meristem 1); ATP binding / kinase/ protein serine/threonine kinase | chr5:26299052-26302171 FORWARDmoderately similar to ( 492)RPK1_IPONI no original description	-1.65518	0.147842
11783193	glyma01g40600	weakly similar to ( 169)AT4G37850| Symbols: | basic helix-loop-helix (bHLH) family protein | chr4:17796356-17797641 REVERSE no original description	1.13861	0.628015
11783199	glyma01g40610	weakly similar to ( 136)AT4G37850| Symbols: | basic helix-loop-helix (bHLH) family protein | chr4:17796356-17797641 REVERSE no original description	1.14882	0.555012
11783204	glyma01g40620	weakly similar to ( 142)AT4G37850| Symbols: | basic helix-loop-helix (bHLH) family protein | chr4:17796356-17797641 REVERSE no original description	-7.8753	0.0764289
11783210	glyma01g40630	no original description	-1.05877	0.891453
11783217	glyma01g40660	moderately similar to ( 369)AT4G17830| Symbols: | peptidase M20/M25/M40 family protein | chr4:9915929-9918062 FORWARD no original description	2.04203	0.0686584
11783224	glyma01g40670	very weakly similar to (83.2)AT4G17810| Symbols: | nucleic acid binding / transcription factor/ zinc ion binding | chr4:9906931-9907545 FORWARD no original description	1.0542	0.764304
11783228	glyma01g40690	weakly similar to ( 151)AT5G46640| Symbols: | DNA-binding family protein | chr5:18941897-18943519 FORWARD no original description	-1.33212	0.0418916
11783236	glyma01g40720	weakly similar to ( 176)AT1G32540| Symbols: LOL1 | LOL1 (LSD ONE LIKE 1) | chr1:11768023-11769571 FORWARD no original description	-3.96606	0.0182743
11783243	glyma01g40780	highly similar to ( 663)AT2G35350| Symbols: PLL1 | PLL1 (POLTERGEIST LIKE 1); protein serine/threonine phosphatase | chr2:14888439-14891195 REVERSE no original description	1.14954	0.473865
11783250	glyma01g40820	moderately similar to ( 441)AT2G32440| Symbols: CYP88A4, KAO2 | KAO2 (ENT-KAURENOIC ACID HYDROXYLASE 2); oxygen binding | chr2:13782745-13784860 FORWARDmoderately similar to ( 427)C88A1_MAIZE no original description	1.12717	0.311199
11783259	glyma01g40830	no original description	3.36084	0.01452
11783263	glyma01g40860	highly similar to ( 716)AT1G32440| Symbols: PKP3 | PKP3 (PLASTIDIAL PYRUVATE KINASE 3); pyruvate kinase | chr1:11712185-11714943 FORWARDhighly similar to ( 748)KPYG_TOBAC no original description	1.12476	0.388922
11783277	glyma01g40870	moderately similar to ( 453)AT2G35380| Symbols: | peroxidase 20 (PER20) (P20) | chr2:14900188-14901037 FORWARDmoderately similar to ( 297)PER1_ARAHY no original description	1.0723	0.927306
11783282	glyma01g40880	highly similar to ( 588)AT4G18010| Symbols: IP5PII | IP5PII (INOSITOL POLYPHOSPHATE 5-PHOSPHATASE II); inositol-polyphosphate 5-phosphatase | chr4:9991206-9994111 REVERSE no original description	1.69646	0.12935
11783299	glyma01g40890	moderately similar to ( 362)AT1G32400| Symbols: TOM2A | TOM2A (TOBAMOVIRUS MULTIPLICATION 2A) | chr1:11689373-11690853 REVERSE no original description	1.13579	0.601573
11783309	glyma01g40900	moderately similar to ( 362)AT4G18020| Symbols: PRR2, APRR2 | APRR2 (PSEUDO-RESPONSE REGULATOR 2) | chr4:10004003-10006694 REVERSE no original description	-1.36747	0.167888
11783326	glyma01g40910	moderately similar to ( 271)AT5G46560| Symbols: | similar to unnamed protein product [Vitis vinifera] (GB:CAO63458.1); contains domain EGF/Laminin (SSF57196) | chr5:18905288-18907317 FORWARD no original description	1.2584	0.456465
11783338	glyma01g40940	weakly similar to ( 101)AT3G59840| Symbols: | similar to hypothetical protein [Vitis vinifera] (GB:CAN83312.1) | chr3:22116830-22117123 REVERSE no original description	-1.55895	0.0289255
11783341	glyma01g40980	very weakly similar to (97.8)ATCG00740| Symbols: RPOA | RNA polymerase alpha subunit | chrC:77901-78890 REVERSEweakly similar to ( 111)RPOA_SOYBN no original description	1.04077	0.852023
11783345	glyma01g40990	no original description	-1.10201	0.693452
11783349	glyma01g41030	moderately similar to ( 257)AT2G38740| Symbols: | haloacid dehalogenase-like hydrolase family protein | chr2:16201717-16203073 REVERSE no original description	1.60004	0.045922
11783360	glyma01g41070	very weakly similar to (98.2)AT2G45760| Symbols: BAL, BAP2 | BAP2 (BON ASSOCIATION PROTEIN 2) | chr2:18854199-18854822 REVERSE no original description	4.81968	0.0471281
[truncated: 44,261 more rows]

## Sheet: Table S4B
Table S4. Differential expression data of soybean genes in R2 leaves under drought stress. (B) Microarray analysis of genes that are annotated with a function.
[truncated: 41,064 more rows]

[truncated: 2 more sheets: Table S4C (UP>=2 q<=0.05), Table S4D (DOWN<=2 q<=0.05)]
