# Supplementary material for: Differential Gene Expression in Soybean Leaf Tissues at Late Developmental Stages under Drought Stress Revealed by Genome-Wide Transcriptome Analysis
Source: PLoS One. 2012 Nov 19;7(11):e49522. doi: 10.1371/journal.pone.0049522 (PMC3505142; doi:10.1371/journal.pone.0049522)
Supplement: Table S5 — Differential expression of hormone-related genes in soybeanV6 and R2 leaves under drought stress. (XLS) [file pone.0049522.s005.xls]

## Sheet: Table S5
Table S5. Differential expression of hormone-related genes in soybean V6 and R2 leaves under drought stress
Glyma ID	Description	Fold change
		V6-D/V6-C	R2-D/R2-C
Auxin (IAA, indole-3-acetic acid)
Glyma0079s00220	weakly similar to ( 103)AT4G38840| Symbols: | auxin-responsive protein, putative | chr4:18125168-18125467 REVERSEweakly similar to ( 182)AX6B_SOYBN no original description	-2.17497	-1.87962
Glyma0079s00310	very weakly similar to (83.2)AT4G38840| Symbols: | auxin-responsive protein, putative | chr4:18125168-18125467 REVERSEweakly similar to ( 119)AX10A_SOYBN no original description	-2.03815	-1.68711
Glyma0079s00320	weakly similar to ( 108)AT4G38840| Symbols: | auxin-responsive protein, putative | chr4:18125168-18125467 REVERSEweakly similar to ( 152)AX6B_SOYBN no original description	-2.09185	-1.906
Glyma0079s00350	weakly similar to ( 110)AT4G38840| Symbols: | auxin-responsive protein, putative | chr4:18125168-18125467 REVERSEweakly similar to ( 146)AX15A_SOYBN no original description	-2.03455	-1.76536
Glyma0079s00370	weakly similar to ( 105)AT4G38840| Symbols: | auxin-responsive protein, putative | chr4:18125168-18125467 REVERSEweakly similar to ( 174)A10A5_SOYBN no original description	-2.06234	-1.60659
Glyma0101s00200	very weakly similar to (93.6)AT4G38840| Symbols: | auxin-responsive protein, putative | chr4:18125168-18125467 REVERSEweakly similar to ( 111)AX10A_SOYBN no original description	-2.0913	-1.315
Glyma03g40880	moderately similar to ( 292)AT1G60710| Symbols: ATB2 | ATB2; oxidoreductase | chr1:22358738-22360292 REVERSEmoderately similar to ( 262)A115_TOBAC no original description	-3.92108	-1.13482
Glyma04g40440	moderately similar to ( 461)AT5G54140| Symbols: ILL3 | ILL3 (IAA-amino acid hydrolase ILR1-like 3); metallopeptidase | chr5:21983059-21985060 FORWARD no original description	-3.29418	-1.35851
Glyma06g13910	weakly similar to ( 130)AT2G46690| Symbols: | auxin-responsive family protein | chr2:19187974-19188339 FORWARD no original description	-2.81143	-1.28186
Glyma06g43110	weakly similar to ( 102)AT4G38840| Symbols: | auxin-responsive protein, putative | chr4:18125168-18125467 REVERSEweakly similar to ( 120)AXX15_SOYBN no original description	-2.20976	-2.00899
Glyma06g43130	very weakly similar to (97.4)AT4G38840| Symbols: | auxin-responsive protein, putative | chr4:18125168-18125467 REVERSEweakly similar to ( 163)AX6B_SOYBN no original description	-2.11172	-1.84915
Glyma06g43140	weakly similar to ( 110)AT4G38840| Symbols: | auxin-responsive protein, putative | chr4:18125168-18125467 REVERSEweakly similar to ( 159)AXX15_SOYBN no original description	-2.11773	-1.36185
Glyma06g43220	weakly similar to ( 111)AT4G38840| Symbols: | auxin-responsive protein, putative | chr4:18125168-18125467 REVERSEweakly similar to ( 167)AX15A_SOYBN no original description	-2.08344	-1.55934
Glyma06g43260	weakly similar to ( 107)AT4G38840| Symbols: | auxin-responsive protein, putative | chr4:18125168-18125467 REVERSEweakly similar to ( 145)AX15A_SOYBN no original description	-2.19304	-1.671
Glyma06g43280	weakly similar to ( 105)AT4G38840| Symbols: | auxin-responsive protein, putative | chr4:18125168-18125467 REVERSEweakly similar to ( 189)A10A5_SOYBN no original description	-2.20019	-1.18419
Glyma06g43330	weakly similar to ( 110)AT4G38840| Symbols: | auxin-responsive protein, putative | chr4:18125168-18125467 REVERSEweakly similar to ( 146)AX15A_SOYBN no original description	-2.03455	-1.76536
Glyma06g43350	weakly similar to ( 105)AT4G38840| Symbols: | auxin-responsive protein, putative | chr4:18125168-18125467 REVERSEweakly similar to ( 189)A10A5_SOYBN no original description	-2.49276	-1.95382
Glyma06g43370	weakly similar to ( 105)AT4G38840| Symbols: | auxin-responsive protein, putative | chr4:18125168-18125467 REVERSEweakly similar to ( 174)A10A5_SOYBN no original description	-2.06234	-1.60659
Glyma06g43380	weakly similar to ( 111)AT4G38840| Symbols: | auxin-responsive protein, putative | chr4:18125168-18125467 REVERSEweakly similar to ( 171)AXX15_SOYBN no original description	-2.11739	-2.08492
Glyma06g43400	weakly similar to ( 108)AT4G38840| Symbols: | auxin-responsive protein, putative | chr4:18125168-18125467 REVERSEweakly similar to ( 152)AX6B_SOYBN no original description	-2.56656	-1.86748
Glyma06g43420	weakly similar to ( 110)AT4G38840| Symbols: | auxin-responsive protein, putative | chr4:18125168-18125467 REVERSEweakly similar to ( 150)AX15A_SOYBN no original description	-2.09604	-1.6328
Glyma06g43430	weakly similar to ( 103)AT4G38840| Symbols: | auxin-responsive protein, putative | chr4:18125168-18125467 REVERSEweakly similar to ( 182)AX6B_SOYBN no original description	-2.07834	-1.72426
Glyma06g43440	weakly similar to ( 105)AT4G38840| Symbols: | auxin-responsive protein, putative | chr4:18125168-18125467 REVERSEweakly similar to ( 189)A10A5_SOYBN no original description	-2.63177	-2.02074
Glyma06g43450	weakly similar to ( 105)AT4G38840| Symbols: | auxin-responsive protein, putative | chr4:18125168-18125467 REVERSEweakly similar to ( 129)AXX15_SOYBN no original description	-2.12152	-1.95619
Glyma06g43470	weakly similar to ( 108)AT4G38840| Symbols: | auxin-responsive protein, putative | chr4:18125168-18125467 REVERSEweakly similar to ( 152)AX6B_SOYBN no original description	-2.09185	-1.906
Glyma07g05760	weakly similar to ( 131)AT2G46690| Symbols: | auxin-responsive family protein | chr2:19187974-19188339 FORWARD no original description	-2.29359	1.0846
Glyma07g34190	highly similar to ( 532)AT1G23080| Symbols: PIN7 | PIN7 (PIN-FORMED 7) | chr1:8180757-8183395 REVERSEmoderately similar to ( 426)PIN1_ORYSA no original description	-2.69484	-8.87921
Glyma08g21030	highly similar to ( 607)AT1G51760| Symbols: JR3, IAR3 | IAR3 (IAA-ALANINE RESISTANT 3); metallopeptidase | chr1:19203231-19205093 FORWARD no original description	-2.21978	1.06792
Glyma09g35370	weakly similar to ( 102)AT4G38840| Symbols: | auxin-responsive protein, putative | chr4:18125168-18125467 REVERSEweakly similar to ( 121)AX15A_SOYBN no original description	-2.76364	-1.96849
Glyma09g35570	weakly similar to ( 110)AT5G18020| Symbols: | auxin-responsive protein, putative | chr5:5966307-5966582 REVERSEweakly similar to ( 107)AX15A_SOYBN no original description	-3.9766	-2.54019
Glyma09g35580	weakly similar to ( 111)AT4G38840| Symbols: | auxin-responsive protein, putative | chr4:18125168-18125467 REVERSEweakly similar to ( 149)AX6B_SOYBN no original description	-6.15874	-6.85735
Glyma10g38890	moderately similar to ( 379)AT1G60710| Symbols: ATB2 | ATB2; oxidoreductase | chr1:22358738-22360292 REVERSEmoderately similar to ( 362)A115_TOBAC no original description	-4.89395	-1.02954
Glyma11g35080	highly similar to ( 723)AT2G38120| Symbols: WAV5, PIR1, MAP1, AUX1 | AUX1 (AUXIN RESISTANT 1); amino acid transmembrane transporter/ transporter | chr2:15980571-15983870 FORWARDhighly similar to ( 775)LAX1_MEDTR no original description	-2.49096	-1.42909
Glyma12g14560	very weakly similar to (93.6)AT4G38840| Symbols: | auxin-responsive protein, putative | chr4:18125168-18125467 REVERSEweakly similar to ( 111)AX10A_SOYBN no original description	-2.0913	-1.315
Glyma12g15000	very weakly similar to (95.5)AT4G38840| Symbols: | auxin-responsive protein, putative | chr4:18125168-18125467 REVERSEweakly similar to ( 111)AX15A_SOYBN no original description	-2.19554	1.23698
Glyma12g32910	highly similar to ( 819)AT4G03400| Symbols: GH3-10, DFL2 | DFL2 (DWARF IN LIGHT 2) | chr4:1497674-1499728 REVERSEhighly similar to ( 570)GH35_ORYSA no original description	-3.36012	-2.89875
Glyma16g02350	weakly similar to ( 125)AT2G46690| Symbols: | auxin-responsive family protein | chr2:19187974-19188339 FORWARD no original description	-6.34797	-2.48128
Glyma18g47630	moderately similar to ( 328)AT5G16530| Symbols: PIN5 | PIN5 (PIN-FORMED 5); auxin:hydrogen symporter/ transporter | chr5:5400738-5402479 FORWARDmoderately similar to ( 330)PIN6_ORYSA no original description	-2.30369	-1.47976
Glyma19g44810	weakly similar to ( 102)AT4G00880| Symbols: | auxin-responsive family protein | chr4:366692-367060 REVERSE no original description	-2.56204	1.89863
Glyma20g01760	highly similar to ( 894)AT1G70940| Symbols: PIN3 | PIN3 (PIN-FORMED 3); auxin:hydrogen symporter/ transporter | chr1:26746832-26749533 FORWARDhighly similar to ( 711)PIN1_ORYSA no original description	-2.51722	-2.00502
Ethylene (ET)
Glyma01g09360	moderately similar to ( 375)AT1G17020| Symbols: ATSRG1, SRG1 | SRG1 (SENESCENCE-RELATED GENE 1); oxidoreductase, acting on paired donors, with incorporation or reduction of molecular oxygen, 2-oxoglutarate as one donor, and incorporation of one atom each of oxygen into both donors | chr1:5820251-5821734 FORWARDweakly similar to ( 172)LDOX_PETHY no original description	10.2263	1.3198
Glyma01g41520	weakly similar to ( 189)AT5G47220| Symbols: ATERF2, ATERF-2, ERF2 | ATERF-2/ATERF2/ERF2 (ETHYLENE RESPONSE FACTOR 2); DNA binding / transcription activator/ transcription factor | chr5:19189250-19189981 REVERSEweakly similar to ( 182)ERF2_NICSY no original description	-2.4815	-1.96402
Glyma02g37350	moderately similar to ( 228)AT2G36690| Symbols: | oxidoreductase, 2OG-Fe(II) oxygenase family protein | chr2:15387009-15389066 FORWARDweakly similar to ( 176)LDOX_MALDO no original description	-4.06794	-2.75478
Glyma02g43560	moderately similar to ( 336)AT1G05010| Symbols: ACO4, EAT1, EFE | EFE (ETHYLENE FORMING ENZYME) | chr1:1431418-1432694 REVERSEmoderately similar to ( 361)ACCO3_PETHY no original description	-3.22805	-1.45595
Glyma03g24980	moderately similar to ( 449)AT1G06620| Symbols: | 2-oxoglutarate-dependent dioxygenase, putative | chr1:2025617-2027093 FORWARDmoderately similar to ( 391)DV4H_CATRO no original description	-3.21211	-1.39848
Glyma04g40600	highly similar to ( 509)AT5G24530| Symbols: | oxidoreductase, 2OG-Fe(II) oxygenase family protein | chr5:8378967-8383157 FORWARDmoderately similar to ( 216)FL3H_PETHY no original description	-4.13512	1.36181
Glyma04g42460	moderately similar to ( 443)AT1G77330| Symbols: | 1-aminocyclopropane-1-carboxylate oxidase, putative / ACC oxidase, putative | chr1:29068109-29069341 REVERSEmoderately similar to ( 331)ACCO_ACTCH no original description	-3.78106	1.00005
Glyma05g15730	weakly similar to ( 157)AT2G25450| Symbols: | 2-oxoglutarate-dependent dioxygenase, putative | chr2:10837364-10838641 REVERSEweakly similar to ( 136)DV4H_CATRO no original description	3.06356	1.97433
Glyma05g18280	weakly similar to ( 124)AT2G25450| Symbols: | 2-oxoglutarate-dependent dioxygenase, putative | chr2:10837364-10838641 REVERSEweakly similar to ( 116)DV4H_CATRO no original description	3.24184	2.12971
Glyma05g26830	moderately similar to ( 391)AT1G17020| Symbols: ATSRG1, SRG1 | SRG1 (SENESCENCE-RELATED GENE 1); oxidoreductase, acting on paired donors, with incorporation or reduction of molecular oxygen, 2-oxoglutarate as one donor, and incorporation of one atom each of oxygen into both donors | chr1:5820251-5821734 FORWARDmoderately similar to ( 212)LDOX_MALDO no original description	-11.4019	-1.56124
Glyma06g12340	moderately similar to ( 440)AT1G77330| Symbols: | 1-aminocyclopropane-1-carboxylate oxidase, putative / ACC oxidase, putative | chr1:29068109-29069341 REVERSEmoderately similar to ( 340)ACCO_ACTCH no original description	-13.4219	-2.73984
Glyma06g13370	weakly similar to ( 147)AT2G44800| Symbols: | oxidoreductase, 2OG-Fe(II) oxygenase family protein | chr2:18474079-18475626 FORWARDweakly similar to ( 127)FLS_PETHY no original description	-3.00254	-1.63739
Glyma06g14190	moderately similar to ( 409)AT5G24530| Symbols: | oxidoreductase, 2OG-Fe(II) oxygenase family protein | chr5:8378967-8383157 FORWARDweakly similar to ( 174)FL3H_VITVI no original description	-12.6411	1.68479
Glyma06g44430	weakly similar to ( 109)AT5G44210| Symbols: ERF9, ATERF9, ATERF-9 | ATERF-9/ATERF9/ERF9 (ERF domain protein 9); DNA binding / transcription factor/ transcription repressor | chr5:17823969-17824571 FORWARDweakly similar to ( 105)ERF4_TOBAC no original description	3.26143	1.81556
Glyma07g03810	moderately similar to ( 394)AT1G15550| Symbols: ATGA3OX1, GA4 | GA4 (GA REQUIRING 4); gibberellin 3-beta-dioxygenase | chr1:5344564-5346073 REVERSEmoderately similar to ( 234)G3O23_WHEAT no original description	-9.0534	-2.97473
Glyma07g25390	moderately similar to ( 273)AT1G03400| Symbols: | 2-oxoglutarate-dependent dioxygenase, putative | chr1:842894-844157 REVERSEmoderately similar to ( 236)DV4H_CATRO no original description	7.66944	5.31154
Glyma08g02130	highly similar to ( 675)AT4G11280| Symbols: | ACS6 (1-AMINOCYCLOPROPANE-1-CARBOXYLIC ACID (ACC) SYNTHASE 6) | chr4:6864164-6865918 FORWARDnearly identical (1002)1A1C_SOYBN no original description	13.224	1.08935
Glyma09g00490	nearly identical (1147)AT1G66340| Symbols: EIN1, ETR, ETR1 | ETR1 (ETHYLENE RESPONSE 1); two-component response regulator | chr1:24738361-24741029 FORWARDnearly identical (1240)ETR1_MALDO no original description	-2.00945	-1.6233
Glyma10g00980	weakly similar to ( 157)AT3G23240| Symbols: ATERF1, ERF1 | ATERF1/ERF1 (ETHYLENE RESPONSE FACTOR 1); DNA binding / transcription activator/ transcription factor | chr3:8295712-8296368 FORWARDvery weakly similar to (85.5)ERF5_NICSY no original description	12.0195	2.53021
Glyma10g04210	weakly similar to ( 135)AT3G23240| Symbols: ATERF1, ERF1 | ATERF1/ERF1 (ETHYLENE RESPONSE FACTOR 1); DNA binding / transcription activator/ transcription factor | chr3:8295712-8296368 FORWARDvery weakly similar to (82.8)ERF2_TOBAC no original description	-7.50876	-10.6551
Glyma10g23460	weakly similar to ( 137)AT5G07580| Symbols: | DNA binding / transcription factor | chr5:2399526-2400350 FORWARDweakly similar to ( 124)ERF5_TOBAC no original description	-6.98859	-4.18733
Glyma11g03070	highly similar to ( 547)AT1G62960| Symbols: ACS10 | ACS10 (ACC SYNTHASE 10); 1-aminocyclopropane-1-carboxylate synthase | chr1:23321936-23323894 REVERSEmoderately similar to ( 369)1A1C_MALDO no original description	-3.16908	-1.84193
Glyma12g13320	very weakly similar to (80.5)AT5G44210| Symbols: ERF9, ATERF9, ATERF-9 | ATERF-9/ATERF9/ERF9 (ERF domain protein 9); DNA binding / transcription factor/ transcription repressor | chr5:17823969-17824571 FORWARDvery weakly similar to (82.4)ERF4_NICSY no original description	5.05465	-1.06346
Glyma12g34200	moderately similar to ( 315)AT4G21200| Symbols: ATGA2OX8 | ATGA2OX8 (GIBBERELLIN 2-OXIDASE 8); gibberellin 2-beta-dioxygenase | chr4:11302761-11306611 FORWARDweakly similar to ( 138)ACCO1_ORYSA no original description	-2.76685	-2.45751
Glyma12g34490	moderately similar to ( 214)AT3G20640| Symbols: | ethylene-responsive protein -related | chr3:7210660-7213205 REVERSE no original description	-2.80914	-3.01329
Glyma13g30990	very weakly similar to (95.9)AT5G44210| Symbols: ERF9, ATERF9, ATERF-9 | ATERF-9/ATERF9/ERF9 (ERF domain protein 9); DNA binding / transcription factor/ transcription repressor | chr5:17823969-17824571 FORWARDweakly similar to ( 107)ERF4_NICSY no original description	3.16302	-2.6829
Glyma13g33890	moderately similar to ( 444)AT1G17020| Symbols: ATSRG1, SRG1 | SRG1 (SENESCENCE-RELATED GENE 1); oxidoreductase, acting on paired donors, with incorporation or reduction of molecular oxygen, 2-oxoglutarate as one donor, and incorporation of one atom each of oxygen into both donors | chr1:5820251-5821734 FORWARDweakly similar to ( 194)LDOX_PETHY no original description	-5.30138	-4.34146
Glyma14g35640	moderately similar to ( 211)AT2G36690| Symbols: | oxidoreductase, 2OG-Fe(II) oxygenase family protein | chr2:15387009-15389066 FORWARDweakly similar to ( 165)LDOX_MALDO no original description	-3.40381	-1.66391
Glyma15g08370	very weakly similar to (90.9)AT5G44210| Symbols: ERF9, ATERF9, ATERF-9 | ATERF-9/ATERF9/ERF9 (ERF domain protein 9); DNA binding / transcription factor/ transcription repressor | chr5:17823969-17824571 FORWARDvery weakly similar to (99.0)ERF4_NICSY no original description	3.49882	1.62795
Glyma15g38480	moderately similar to ( 317)AT1G17020| Symbols: ATSRG1, SRG1 | SRG1 (SENESCENCE-RELATED GENE 1); oxidoreductase, acting on paired donors, with incorporation or reduction of molecular oxygen, 2-oxoglutarate as one donor, and incorporation of one atom each of oxygen into both donors | chr1:5820251-5821734 FORWARDweakly similar to ( 130)LDOX_PETHY no original description	-6.50978	-1.71128
Glyma16g08470	moderately similar to ( 472)AT1G35190| Symbols: | oxidoreductase, 2OG-Fe(II) oxygenase family protein | chr1:12890522-12892610 FORWARDvery weakly similar to (97.1)G2OX1_PEA no original description	7.49232	2.07589
Glyma18g50870	moderately similar to ( 264)AT5G24530| Symbols: | oxidoreductase, 2OG-Fe(II) oxygenase family protein | chr5:8378967-8383157 FORWARDweakly similar to ( 173)FL3H_MALDO no original description	35.7003	18.1647
Glyma19g40090	highly similar to ( 892)AT2G40940| Symbols: ERS, ERS1 | ERS1 (ETHYLENE RESPONSE SENSOR 1); receptor | chr2:17091713-17093897 REVERSEhighly similar to ( 860)ETR1_PRUPE no original description	-2.38756	-2.02802
Glyma19g40330	weakly similar to ( 134)AT3G62550| Symbols: | universal stress protein (USP) family protein | chr3:23147170-23148050 FORWARD no original description	-4.08518	-5.37339
Abscisic acid (ABA)
Glyma01g35910	highly similar to ( 735)AT4G19170| Symbols: NCED4 | NCED4 (NINE-CIS-EPOXYCAROTENOID DIOXYGENASE 4) | chr4:10481846-10483633 FORWARD no original description	-2.81022	-1.46042
Glyma02g14880	moderately similar to ( 226)AT1G49720| Symbols: ABF1 | ABF1 (ABSCISIC ACID RESPONSIVE ELEMENT-BINDING FACTOR 1); DNA binding / transcription activator/ transcription factor | chr1:18404494-18406022 FORWARD no original description	-5.30625	7.27118
Glyma03g00580	moderately similar to ( 230)AT3G56850| Symbols: DPBF3, AREB3 | AREB3 (ABA-RESPONSIVE ELEMENT BINDING PROTEIN 3); DNA binding / transcription activator/ transcription factor | chr3:21057533-21058873 REVERSE no original description	3.45176	4.77727
Glyma04g04170	moderately similar to ( 265)AT1G45249| Symbols: AREB1, ABF2 | ABF2 (ABSCISIC ACID RESPONSIVE ELEMENTS-BINDING FACTOR 2); transcription factor | chr1:17168629-17169855 REVERSE no original description	3.7936	8.4197
Glyma06g04350	weakly similar to ( 187)AT1G45249| Symbols: AREB1, ABF2 | ABF2 (ABSCISIC ACID RESPONSIVE ELEMENTS-BINDING FACTOR 2); transcription factor | chr1:17168629-17169855 REVERSE no original description	4.27741	11.8684
Glyma06g17610	weakly similar to ( 148)AT4G24960| Symbols: HVA22D, ATHVA22D | ATHVA22D (Arabidopsis thaliana HVA22 homologue D) | chr4:12828411-12828992 FORWARDweakly similar to ( 153)HVA22_HORVU no original description	11.1379	41.9066
Glyma08g18800	moderately similar to ( 278)AT1G30100| Symbols: ATNCED5, NCED5 | NCED5 (NINE-CIS-EPOXYCAROTENOID DIOXYGENASE 5) | chr1:10571367-10573136 FORWARD no original description	5.47361	21.4653
Glyma09g00460	nearly identical (1061)AT1G16540| Symbols: SIR3, LOS5, ABA3, ATABA3 | ABA3/ATABA3/LOS5/SIR3 (ABA DEFICIENT 3); Mo-molybdopterin cofactor sulfurase/ selenocysteine lyase | chr1:5659458-5665194 FORWARDhighly similar to ( 861)MOCOS_ORYSA no original description	2.13542	1.99079
Glyma10g25680	very weakly similar to (82.4)AT4G24960| Symbols: HVA22D, ATHVA22D | ATHVA22D (Arabidopsis thaliana HVA22 homologue D) | chr4:12828411-12828992 FORWARDvery weakly similar to (87.0)HVA22_HORVU no original description	4.49336	8.64669
Glyma11g05960	highly similar to ( 921)AT5G67030| Symbols: LOS6, NPQ2, ATABA1, ZEP, IBS3, ATZEP, ABA1 | ABA1 (ABA DEFICIENT 1); zeaxanthin epoxidase | chr5:26771252-26774316 REVERSEhighly similar to ( 900)ABA2_NICPL no original description	4.32712	11.8438
Glyma14g04950	nearly identical (1614)AT2G27150| Symbols: AAO3 | AAO3 (ABSCISIC ALDEHYDE OXIDASE 3) | chr2:11609030-11614092 FORWARDnearly identical (1456)ALDOL_ORYSA no original description	4.2634	2.10271
Glyma15g40070	highly similar to ( 504)AT3G14440| Symbols: ATNCED3, STO1, NCED3 | NCED3 (NINE-CIS-EPOXYCAROTENOID DIOXYGENASE3) | chr3:4831685-4833484 REVERSE no original description	9.88152	45.3559
Glyma17g20020	highly similar to ( 880)AT5G67030| Symbols: LOS6, NPQ2, ATABA1, ZEP, IBS3, ATZEP, ABA1 | ABA1 (ABA DEFICIENT 1); zeaxanthin epoxidase | chr5:26771252-26774316 REVERSEhighly similar to ( 875)ABA2_NICPL no original description	-2.12895	-1.04596
Glyma19g27260	moderately similar to ( 281)AT5G13200| Symbols: | GRAM domain-containing protein / ABA-responsive protein-related | chr5:4207084-4208082 FORWARD no original description	10.5315	3.86046
Jasmonate (JA)
Glyma02g26160	highly similar to ( 949)AT3G45140| Symbols: ATLOX2, LOX2 | LOX2 (LIPOXYGENASE 2) | chr3:16536422-16540218 FORWARDhighly similar to ( 984)LOXC2_ORYSA no original description	46.9642	2.0668
Glyma03g39730	nearly identical (1226)AT1G55020| Symbols: LOX1 | LOX1 (Lipoxygenase 1); lipoxygenase | chr1:20529465-20533810 FORWARDnearly identical (1216)LOX1_SOLTU no original description	2.09197	1.68024
Glyma07g06370	highly similar to ( 813)AT2G46370| Symbols: JAR, FIN219, JAR1 | JAR1 (JASMONATE RESISTANT 1) | chr2:19041652-19043442 FORWARDhighly similar to ( 828)GH35_ORYSA no original description	-3.06247	-1.42946
Glyma07g21100	moderately similar to ( 310)AT5G42650| Symbols: CYP74A, AOS | AOS (ALLENE OXIDE SYNTHASE); hydro-lyase/ oxygen binding | chr5:17115031-17116587 REVERSEmoderately similar to ( 324)C74A1_ORYSA no original description	-3.31254	-1.3721
Glyma10g29490	nearly identical (1203)AT1G55020| Symbols: LOX1 | LOX1 (Lipoxygenase 1); lipoxygenase | chr1:20529465-20533810 FORWARDnearly identical (1223)LOX1_SOLTU no original description	-7.06932	1.41143
Glyma12g31770	moderately similar to ( 447)AT4G15440| Symbols: CYP74B2, HPL1 | HPL1 (HYDROPEROXIDE LYASE 1); heme binding / iron ion binding / monooxygenase | chr4:8835868-8838461 FORWARDmoderately similar to ( 280)C74A4_ORYSA no original description	-4.23016	-1.68375
Glyma14g39790	highly similar to ( 517)AT1G76680| Symbols: OPR1 | OPR1 (12-oxophytodienoate reductase 1); 12-oxophytodienoate reductase | chr1:28781876-28783165 FORWARD no original description	3.11411	3.81314
Glyma16g01070	nearly identical (1335)AT1G72520| Symbols: | lipoxygenase, putative | chr1:27312273-27316251 FORWARDnearly identical (1168)LOX6_ORYSA no original description	-3.26072	-1.08729
Glyma19g44310	highly similar to ( 807)AT2G46370| Symbols: JAR, FIN219, JAR1 | JAR1 (JASMONATE RESISTANT 1) | chr2:19041652-19043442 FORWARDhighly similar to ( 839)GH35_ORYSA no original description	-2.48516	-1.96153
Glyma20g11610	highly similar to ( 905)AT3G45140| Symbols: ATLOX2, LOX2 | LOX2 (LIPOXYGENASE 2) | chr3:16536422-16540218 FORWARDhighly similar to ( 913)LOXC2_ORYSA no original description	25.0979	3.6781
Glyma20g28290	nearly identical (1167)AT3G22400| Symbols: LOX5 | LOX5; lipoxygenase | chr3:7927018-7931174 FORWARDnearly identical (1112)LOX1_SOLTU no original description	-8.5129	-4.4126
Giberelline (GA)
Glyma06g04740	very weakly similar to (80.5)AT5G59845| Symbols: | gibberellin-regulated family protein | chr5:24128669-24129034 FORWARD no original description	-23.3609	-19.2755
Glyma06g16080	weakly similar to ( 179)AT5G07200| Symbols: GA20OX3, ATGA20OX3 | YAP169 (GIBBERELLIN 20 OXIDASE 3); gibberellin 20-oxidase | chr5:2243836-2245158 REVERSEweakly similar to ( 178)GAOX2_ORYSA no original description	-9.18415	-6.91043
Glyma10g12130	moderately similar to ( 344)AT1G52790| Symbols: | oxidoreductase, 2OG-Fe(II) oxygenase family protein | chr1:19665862-19666969 REVERSEvery weakly similar to (88.2)GAOX1_ORYSA no original description	-9.47673	-1.96749
Glyma11g33720	highly similar to ( 645)AT1G14920| Symbols: RGA2, GAI | GAI (GA INSENSITIVE); transcription factor | chr1:5149409-5151010 FORWARDhighly similar to ( 707)GAI_GOSHI no original description	-2.20974	-1.24838
Glyma13g43850	moderately similar to ( 424)AT1G15550| Symbols: ATGA3OX1, GA4 | GA4 (GA REQUIRING 4); gibberellin 3-beta-dioxygenase | chr1:5344564-5346073 REVERSEmoderately similar to ( 251)G3O23_WHEAT no original description	-2.59453	-8.51097
Glyma15g01500	moderately similar to ( 404)AT1G15550| Symbols: ATGA3OX1, GA4 | GA4 (GA REQUIRING 4); gibberellin 3-beta-dioxygenase | chr1:5344564-5346073 REVERSEmoderately similar to ( 236)G3O23_WHEAT no original description	-9.17548	-6.56418
Glyma15g39750	moderately similar to ( 375)AT1G30040| Symbols: ATGA2OX2 | ATGA2OX2; gibberellin 2-beta-dioxygenase | chr1:10537753-10538765 FORWARDhighly similar to ( 547)G2OX1_PEA no original description	-8.65978	-1.69152
Glyma17g30800	moderately similar to ( 296)AT1G15550| Symbols: ATGA3OX1, GA4 | GA4 (GA REQUIRING 4); gibberellin 3-beta-dioxygenase | chr1:5344564-5346073 REVERSEmoderately similar to ( 234)G3O23_WHEAT no original description	7.45762	1.27367
Glyma17g37760	very weakly similar to (80.1)AT1G75750| Symbols: GASA1 | GASA1 (GAST1 PROTEIN HOMOLOG 1) | chr1:28445474-28445945 REVERSE no original description	3.04445	-1.31073
Glyma20g34260	moderately similar to ( 357)AT1G14920| Symbols: RGA2, GAI | GAI (GA INSENSITIVE); transcription factor | chr1:5149409-5151010 FORWARDmoderately similar to ( 369)GAI1_VITVI no original description	2.88612	1.81825
Brassinosteroid (BR)
Glyma02g08950	moderately similar to ( 219)AT5G16010| Symbols: | 3-oxo-5-alpha-steroid 4-dehydrogenase family protein / steroid 5-alpha-reductase family protein | chr5:5227985-5229015 FORWARD no original description	2.54157	1.01592
Glyma04g02270	moderately similar to ( 456)AT1G20330| Symbols: CVP1, FRL1, SMT2 | SMT2 (STEROL METHYLTRANSFERASE 2) | chr1:7038958-7040043 REVERSEmoderately similar to ( 374)SMT2_ORYSA no original description	-2.13548	-1.51163
Glyma08g06810	highly similar to ( 717)AT1G58440| Symbols: SQE1, XF1 | XF1 (SQUALENE EPOXIDASE 1); oxidoreductase | chr1:21717759-21720911 REVERSEhighly similar to ( 744)ERG1_PANGI no original description	2.98379	-3.88602
Glyma12g01160	highly similar to ( 582)AT5G13710| Symbols: CPH, SMT1 | SMT1 (STEROL METHYLTRANSFERASE 1) | chr5:4424051-4426869 REVERSEhighly similar to ( 535)SMT1_ORYSA no original description	-11.6441	-2.4997
Glyma12g03210	highly similar to ( 986)AT3G19820| Symbols: DIM, EVE1, DW1, DIM1, CBB1, DWF1 | DWF1 (DIMINUTO 1); catalytic | chr3:6879841-6881622 REVERSEnearly identical (1075)DIM_PEA no original description	-3.26868	-2.21345
Glyma13g07800	moderately similar to ( 364)AT3G02580| Symbols: DWF7, BUL1 | STE1 (STEROL 1); C-5 sterol desaturase | chr3:547055-548622 FORWARDmoderately similar to ( 375)SC5D_TOBAC no original description	-3.71722	-2.34289
Glyma13g32600	highly similar to ( 748)AT1G58440| Symbols: SQE1, XF1 | XF1 (SQUALENE EPOXIDASE 1); oxidoreductase | chr1:21717759-21720911 REVERSEhighly similar to ( 762)ERG1_PANGI no original description	2.15879	-1.89271
Glyma14g08320	moderately similar to ( 246)AT1G19350| Symbols: BZR2, BES1 | BES1 (BRI1-EMS-SUPPRESSOR 1) | chr1:6688832-6690156 FORWARD no original description	-2.27981	1.39974
Cytokinin (CK)
Glyma03g28910	highly similar to ( 589)AT2G41510| Symbols: ATCKX1, CKX1 | ATCKX1/CKX1 (CYTOKININ OXIDASE/DEHYDROGENASE 1); cytokinin dehydrogenase | chr2:17321704-17323939 FORWARDmoderately similar to ( 324)CKX1_MAIZE no original description	-24.6157	-3.70766
Glyma04g05840	highly similar to ( 598)AT5G21482| Symbols: ATCKX5, CKX7 | CKX7 (CYTOKININ OXIDASE 7); oxidoreductase | chr5:7226845-7230055 FORWARDmoderately similar to ( 294)CKX1_MAIZE no original description	-14.436	-1.9105
Glyma08g11060	nearly identical (1377)AT1G27320| Symbols: AHK3 | AHK3 (ARABIDOPSIS HISTIDINE KINASE 3) | chr1:9487767-9492014 FORWARDweakly similar to ( 158)ETR1_BRAOL no original description	2.00122	1.24852
Glyma09g35950	highly similar to ( 752)AT3G63440| Symbols: ATCKX6, CKX6, ATCKX7 | ATCKX6/ATCKX7/CKX6 (CYTOKININ OXIDASE/DEHYDROGENASE 6); cytokinin dehydrogenase | chr3:23435266-23437240 FORWARDmoderately similar to ( 405)CKX1_MAIZE no original description	6.535	-2.35544
Glyma11g20860	highly similar to ( 756)AT3G63440| Symbols: ATCKX6, CKX6, ATCKX7 | ATCKX6/ATCKX7/CKX6 (CYTOKININ OXIDASE/DEHYDROGENASE 6); cytokinin dehydrogenase | chr3:23435266-23437240 FORWARDmoderately similar to ( 418)CKX1_MAIZE no original description	-37.3776	-9.93265
Glyma12g01390	highly similar to ( 605)AT3G63440| Symbols: ATCKX6, CKX6, ATCKX7 | ATCKX6/ATCKX7/CKX6 (CYTOKININ OXIDASE/DEHYDROGENASE 6); cytokinin dehydrogenase | chr3:23435266-23437240 FORWARDmoderately similar to ( 330)CKX1_MAIZE no original description	9.30924	2.46173
Glyma17g34330	highly similar to ( 627)AT5G21482| Symbols: ATCKX5, CKX7 | CKX7 (CYTOKININ OXIDASE 7); oxidoreductase | chr5:7226845-7230055 FORWARDmoderately similar to ( 331)CKX1_MAIZE no original description	-3.83392	-2.79272
Glyma19g31620	highly similar to ( 740)AT2G41510| Symbols: ATCKX1, CKX1 | ATCKX1/CKX1 (CYTOKININ OXIDASE/DEHYDROGENASE 1); cytokinin dehydrogenase | chr2:17321704-17323939 FORWARDmoderately similar to ( 393)CKX1_MAIZE no original description	-20.7967	-1.17806
Salicylic acid (SA)
Glyma16g24740	moderately similar to ( 286)AT3G11480| Symbols: BSMT1 | BSMT1; S-adenosylmethionine-dependent methyltransferase | chr3:3614550-3617143 FORWARDmoderately similar to ( 286)BAMT_ANTMA no original description	-22.8869	-1.76064
Glyma16g24830	moderately similar to ( 263)AT4G36470| Symbols: | S-adenosyl-L-methionine:carboxyl methyltransferase family protein | chr4:17215131-17216478 REVERSEmoderately similar to ( 276)BAMT_ANTMA no original description	-2.11037	-1.18156
